# Supplementary material for: Identification of a Novel IncHI1B Plasmid in MDR Klebsiella pneumoniae 200 from Swine in China
Source: Antibiotics (Basel). 2022 Sep 9;11(9):1225. doi: 10.3390/antibiotics11091225 (PMC9494989; doi:10.3390/antibiotics11091225)
Supplement: Supplementary file 1 [file antibiotics-11-01225-s001.zip › Table S1.pdf]

Table S1. Antimicrobial resistance profile of *K. pneumoniae* 200

| Antimicrobial agents          | Profile |
|-------------------------------|---------|
| Cefotaxime                    | R       |
| Ceftazidime                   | R       |
| Cefoxitin                     | R       |
| Oxacillin                     | R       |
| Meropenem                     | S       |
| Imipenem                      | S       |
| amikacin                      | R       |
| Gentamicin                    | R       |
| Kanamycin                     | R       |
| Streptomycin                  | R       |
| Ciprofloxacin                 | R       |
| Chloramphenicol               | R       |
| Erythromycin                  | R       |
| Tetracycline                  | R       |
| Trimethoprim-Sulfamethoxazole | R       |
