# Supplementary material for: Identification of a Novel IncHI1B Plasmid in MDR Klebsiella pneumoniae 200 from Swine in China
Source: Antibiotics (Basel). 2022 Sep 9;11(9):1225. doi: 10.3390/antibiotics11091225 (PMC9494989; doi:10.3390/antibiotics11091225)
Supplement: Supplementary file 1 [file antibiotics-11-01225-s001.zip › Table S2.pdf]

Table S2. Characteristics of *K. pneumonia* strain 200

| Parameter                         | Chromosome                                                                                                                                                                                                                                                                                                                                                                                                                                                             |
|-----------------------------------|------------------------------------------------------------------------------------------------------------------------------------------------------------------------------------------------------------------------------------------------------------------------------------------------------------------------------------------------------------------------------------------------------------------------------------------------------------------------|
| Size(bp)                          | 5,257,665                                                                                                                                                                                                                                                                                                                                                                                                                                                              |
| G+C(%)                            | 58.78                                                                                                                                                                                                                                                                                                                                                                                                                                                                  |
| No. of predicted coding sequences | 5,106                                                                                                                                                                                                                                                                                                                                                                                                                                                                  |
| Resistance genes                  | <p><i>gyrB, emrD, eefC, eefB, eefA, acrF, acrE, acrS, folP, evgA, tolC, parE, basR, parC, mdtP, mdtO, mdtN, dfrE, emrB, emrA, oqxB, oqxA, acrD, gyrA, baeR, baeS, mdtD, mdtC, mdtB, mdtA, ompC, sdiA, hns, mdtM, adeR, kexd, mdtK, katG, marR, marA, bla<sub>SHV-182</sub>, phoP, phoQ, mdtH, mdtG, macB, macA, mdeA, eptA, PmrA, PmrB, ramA, acrR, acrA, acrB, mdtG, phoE, folA, robA, mdtM, fosA5, soxR, soxS, rpoC, rpoB, cpxR, cpxA, mdtD, mdtL, sul, qacE</i></p> |
| Virulence genes                   | <p><i>fepC, msbA, ilpA, rfaF, rfaD, entA, manB, gmhA, ureG, ureB, rfaE, fimE, fimB, fimF, fimH, focA, fimA, fimD, sfaF, focD, fimC, entE, entF, shuU, fepD, fepG, chuS, shuS, fepA, algU, entC, iroN, iroE, iutA, galU, rffG, entB, kdsA, fepB, sodB, mgtC, acpXL, kdsB, entS, fes, clpP, ecpB, ecpD, ecpC, ecpA, ecpR, lpxB, lpxA, lpxD, htpB, icl, mrkA, mrkB, mrkC, mrkD, mrkE, mrkF, mrkJ, mrkI, mrkH</i></p>                                                      |
