# Supplementary material for: Identification of a Novel IncHI1B Plasmid in MDR Klebsiella pneumoniae 200 from Swine in China
Source: Antibiotics (Basel). 2022 Sep 9;11(9):1225. doi: 10.3390/antibiotics11091225 (PMC9494989; doi:10.3390/antibiotics11091225)
Supplement: Supplementary file 1 [file antibiotics-11-01225-s001.zip › Table S3.xlsx]

## Sheet: Sheet1
Table S3. Compared plasmid pYhe2002 with the plasmid records contained in PLSDB
ACC_NUCCORE	distance	pvalue	shared_hashes	recid	Topology_NUCCORE	CreateDate_NUCCORE	Location_BIOSAMPLE	loc_parsed	loc_lat	loc_lng	IsolationSource_BIOSAMPLE	Host_BIOSAMPLE	SamplType_BIOSAMPLE	plasmidfinder	pmlst	Length_NUCCORE	GC_NUCCORE	taxon_name	taxon_species_name	taxon_genus_name	taxon_family_name	taxon_order_name	taxon_class_name	taxon_phylum_name	taxon_superkingdom_name	D1	D2
NZ_CP064179.1	0.000508006	0	979	1	circular	2020-11-11	China:henan	China,henan	34	114	Anal swab	swine	mixed culture	IncFIA(HI1)_1, AF250878,	IncF RST(F-:A13:B-):FIA(13);FIB(-);FIC(-);FII(-);FIIK(-);FIIS(-);FIIY(-)	73978	51.7127	Klebsiella pneumoniae	Klebsiella pneumoniae (573)	Klebsiella (570)	Enterobacteriaceae (543)	Enterobacterales (91347)	Gammaproteobacteria (1236)	Proteobacteria (1224)	Bacteria (2)	4.48898	5.52341
CP028782.2	0.000705841	0	971	2	circular	2018-04-05	China: Yibin, Sichuan	China,Yibin,Sichuan	28.7989	104.729		Homo sapiens	Culture	IncFIA(HI1)_1, AF250878,	IncF RST(F-:A13:B-):FIA(13);FIB(-);FIC(-);FII(-);FIIK(-);FIIS(-);FIIY(-)	74010	51.6863	Klebsiella pneumoniae subsp. pneumoniae	Klebsiella pneumoniae (573)	Klebsiella (570)	Enterobacteriaceae (543)	Enterobacterales (91347)	Gammaproteobacteria (1236)	Proteobacteria (1224)	Bacteria (2)	4.41199	5.54467
CP052289.1	0.0212234	0	471	3	circular	2020-05-04	South Korea: Jeonnam		34.87	126.99	blood	Homo sapiens		IncFIA(HI1)_1, AF250878,	IncF RST(F-:A13:B-):FIA(13);FIB(-);FIC(-);FII(-);FIIK(-);FIIS(-);FIIY(-)	51408	51.6379	Klebsiella pneumoniae	Klebsiella pneumoniae (573)	Klebsiella (570)	Enterobacteriaceae (543)	Enterobacterales (91347)	Gammaproteobacteria (1236)	Proteobacteria (1224)	Bacteria (2)	4.45705	5.57608
NZ_CP044120.1	0.0278663	0	386	4	circular	2019-09-27	China:Wenzhou	China,Wenzhou	28.0153	120.656		duck	stool specimens	IncR_1, DQ449578, |IncFIA(HI1)_1, AF250878,	IncF RST(F-:A13:B-):FIA(13);FIB(-);FIC(-);FII(-);FIIK(-);FIIS(-);FIIY(-)	68566	53.1896	Raoultella planticola	Raoultella planticola (575)	Raoultella (160674)	Enterobacteriaceae (543)	Enterobacterales (91347)	Gammaproteobacteria (1236)	Proteobacteria (1224)	Bacteria (2)	4.39442	5.51742
NZ_CP021163.1	0.0279555	0	385	5	circular	2018-06-07	USA:Boston	USA,Boston	42.3603	-71.0583	wound	Homo sapiens		IncFIA(HI1)_1, AF250878, |IncR_1, DQ449578,	IncF RST(F-:A13:B-):FIA(13);FIB(-);FIC(-);FII(-);FIIK(-);FIIS(-);FIIY(-)	68573	53.1871	Enterobacter hormaechei	Enterobacter hormaechei (158836)	Enterobacter (547)	Enterobacteriaceae (543)	Enterobacterales (91347)	Gammaproteobacteria (1236)	Proteobacteria (1224)	Bacteria (2)	4.40916	5.51991
NZ_MH477637.1	0.0281347	0	383	6	circular	2020-06-03								IncR_1, DQ449578, |IncFIA(HI1)_1, AF250878,	IncF RST(F-:A13:B-):FIA(13);FIB(-);FIC(-);FII(-);FIIK(-);FIIS(-);FIIY(-)	67510	52.884	Citrobacter freundii	Citrobacter freundii (546)	Citrobacter (544)	Enterobacteriaceae (543)	Enterobacterales (91347)	Gammaproteobacteria (1236)	Proteobacteria (1224)	Bacteria (2)	4.37088	5.47396
NZ_CP040362.1	0.0281347	0	383	7	circular	2019-07-18	China: Wenzhou	China,Wenzhou	28.0153	120.656		Rabbit	faeces	IncFIA(HI1)_1, AF250878, |IncR_1, DQ449578,	IncF RST(F-:A13:B-):FIA(13);FIB(-);FIC(-);FII(-);FIIK(-);FIIS(-);FIIY(-)	74011	53.1043	Klebsiella pneumoniae	Klebsiella pneumoniae (573)	Klebsiella (570)	Enterobacteriaceae (543)	Enterobacterales (91347)	Gammaproteobacteria (1236)	Proteobacteria (1224)	Bacteria (2)	4.39523	5.5242
LR890546.1	0.0281347	0	383	8	circular	2020-10-30								IncFIA(HI1)_1, AF250878,	IncF RST(F-:A13:B-):FIA(13);FIB(-);FIC(-);FII(-);FIIK(-);FIIS(-);FIIY(-)	52976	51.7687	Klebsiella pneumoniae	Klebsiella pneumoniae (573)	Klebsiella (570)	Enterobacteriaceae (543)	Enterobacterales (91347)	Gammaproteobacteria (1236)	Proteobacteria (1224)	Bacteria (2)	4.45707	5.59208
NZ_CP021168.1	0.0284967	0	379	9	circular	2018-06-07	USA:Boston	USA,Boston	42.3603	-71.0583	missing	missing	cell culture	IncFIA(HI1)_1, AF250878, |IncR_1, DQ449578,	IncF RST(F-:A13:B-):FIA(13);FIB(-);FIC(-);FII(-);FIIK(-);FIIS(-);FIIY(-)	79064	53.6072	Enterobacter hormaechei	Enterobacter hormaechei (158836)	Enterobacter (547)	Enterobacteriaceae (543)	Enterobacterales (91347)	Gammaproteobacteria (1236)	Proteobacteria (1224)	Bacteria (2)	4.38384	5.53077
CP052471.1	0.0299949	0	363	10	circular	2020-05-04	South Korea: Gangwon		37.82	128.16	blood	Homo sapiens		IncR_1, DQ449578, |IncFIA(HI1)_1, AF250878,	IncF RST(F-:A13:B-):FIA(13);FIB(-);FIC(-);FII(-);FIIK(-);FIIS(-);FIIY(-)	89703	52.4999	Klebsiella pneumoniae	Klebsiella pneumoniae (573)	Klebsiella (570)	Enterobacteriaceae (543)	Enterobacterales (91347)	Gammaproteobacteria (1236)	Proteobacteria (1224)	Bacteria (2)	4.42454	5.54038
CP052554.1	0.0300913	0	362	11	circular	2020-05-04	South Korea: Seoul		37.57	126.98	blood	Homo sapiens		IncR_1, DQ449578, |IncFIA(HI1)_1, AF250878,	IncF RST(F-:A13:B-):FIA(13);FIB(-);FIC(-);FII(-);FIIK(-);FIIS(-);FIIY(-)	87818	52.7147	Klebsiella pneumoniae	Klebsiella pneumoniae (573)	Klebsiella (570)	Enterobacteriaceae (543)	Enterobacterales (91347)	Gammaproteobacteria (1236)	Proteobacteria (1224)	Bacteria (2)	4.39385	5.52353
NZ_CP035381.1	0.030875	0	354	12	circular	2019-07-17	China:Wenzhou	China,Wenzhou	28.0153	120.656			single culture	IncFIA(HI1)_1, AF250878, |IncR_1, DQ449578,	IncF RST(F-:A13:B-):FIA(13);FIB(-);FIC(-);FII(-);FIIK(-);FIIS(-);FIIY(-)	64226	53.0362	Leclercia adecarboxylata	Leclercia adecarboxylata (83655)	Leclercia (83654)	Enterobacteriaceae (543)	Enterobacterales (91347)	Gammaproteobacteria (1236)	Proteobacteria (1224)	Bacteria (2)	4.38549	5.52245
NZ_CP063218.1	0.0312752	0	350	13	circular	2020-11-04	Hong Kong	Hong Kong	22.3506	114.185		Homo sapiens	whole organism	IncFIA(HI1)_1, AF250878, |IncR_1, DQ449578,	IncF RST(F-:A13:B-):FIA(13);FIB(-);FIC(-);FII(-);FIIK(-);FIIS(-);FIIY(-)	59223	50.8029	Klebsiella pneumoniae	Klebsiella pneumoniae (573)	Klebsiella (570)	Enterobacteriaceae (543)	Enterobacterales (91347)	Gammaproteobacteria (1236)	Proteobacteria (1224)	Bacteria (2)	4.42841	5.52545
NZ_CP009116.1	0.0330427	0	333	14	circular	2015-01-21	USA: HHS Region 5		41	-81	clinical urine culture	Homo sapiens		IncR_1, DQ449578, |IncFIA(HI1)_1, AF250878,	IncF RST(F-:A13:B-):FIA(13);FIB(-);FIC(-);FII(-);FIIK(-);FIIS(-);FIIY(-)	94760	51.2906	Klebsiella pneumoniae	Klebsiella pneumoniae (573)	Klebsiella (570)	Enterobacteriaceae (543)	Enterobacterales (91347)	Gammaproteobacteria (1236)	Proteobacteria (1224)	Bacteria (2)	4.37843	5.59279
NZ_CP032212.1	0.0342477	0	322	15	circular	2018-09-19	missing				missing	missing		IncFIA(HI1)_1, AF250878, |IncR_1, DQ449578,	IncF RST(F-:A13:B-):FIA(13);FIB(-);FIC(-);FII(-);FIIK(-);FIIS(-);FIIY(-)	83015	51.6365	Klebsiella pneumoniae	Klebsiella pneumoniae (573)	Klebsiella (570)	Enterobacteriaceae (543)	Enterobacterales (91347)	Gammaproteobacteria (1236)	Proteobacteria (1224)	Bacteria (2)	4.42987	5.55172
NZ_CP032176.1	0.035622	0	310	16	circular	2018-09-19	missing				missing	missing		IncFIA(HI1)_1, AF250878, |IncR_1, DQ449578,	IncF RST(F-:A13:B-):FIA(13);FIB(-);FIC(-);FII(-);FIIK(-);FIIS(-);FIIY(-)	90682	53.4748	Klebsiella pneumoniae	Klebsiella pneumoniae (573)	Klebsiella (570)	Enterobacteriaceae (543)	Enterobacterales (91347)	Gammaproteobacteria (1236)	Proteobacteria (1224)	Bacteria (2)	4.42499	5.52655
NZ_CP034677.1	0.0359759	0	307	17	circular	2019-01-06	China: Sichuan	China,Sichuan	30.5	102.5	feces	swine	single cell	IncR_1, DQ449578, |IncFIA(HI1)_1, AF250878,	IncF RST(F-:A13:B-):FIA(13);FIB(-);FIC(-);FII(-);FIIK(-);FIIS(-);FIIY(-)	80476	50.8313	Klebsiella quasipneumoniae	Klebsiella quasipneumoniae (1463165)	Klebsiella (570)	Enterobacteriaceae (543)	Enterobacterales (91347)	Gammaproteobacteria (1236)	Proteobacteria (1224)	Bacteria (2)	4.41982	5.59469
NZ_AP022352.1	0.0364545	0	303	18	circular	2020-08-04	Japan:Osaka	Japan,Osaka	34.6938	135.501		Homo sapiens		IncR_1, DQ449578, |IncFIA(HI1)_1, AF250878,	IncF RST(F-:A13:B-):FIA(13);FIB(-);FIC(-);FII(-);FIIK(-);FIIS(-);FIIY(-)	75525	50.8891	Klebsiella pneumoniae	Klebsiella pneumoniae (573)	Klebsiella (570)	Enterobacteriaceae (543)	Enterobacterales (91347)	Gammaproteobacteria (1236)	Proteobacteria (1224)	Bacteria (2)	4.4314	5.55173
NZ_CP040697.1	0.0364545	0	303	19	circular	2019-06-07	China:Wenzhou	China,Wenzhou	28.0153	120.656		Rabbit	single culture	IncR_1, DQ449578, |IncFIA(HI1)_1, AF250878,	IncF RST(F-:A13:B-):FIA(13);FIB(-);FIC(-);FII(-);FIIK(-);FIIS(-);FIIY(-)	53964	54.2454	Citrobacter freundii	Citrobacter freundii (546)	Citrobacter (544)	Enterobacteriaceae (543)	Enterobacterales (91347)	Gammaproteobacteria (1236)	Proteobacteria (1224)	Bacteria (2)	4.40781	5.58361
CP063876.1	0.0365754	0	302	20	circular	2020-11-08	China:Shenzhen		22.32	114.03	Manis javanica			IncR_1, DQ449578, |IncFIA(HI1)_1, AF250878,	IncF RST(F-:A13:B-):FIA(13);FIB(-);FIC(-);FII(-);FIIK(-);FIIS(-);FIIY(-)	56886	52.948	Klebsiella quasipneumoniae	Klebsiella quasipneumoniae (1463165)	Klebsiella (570)	Enterobacteriaceae (543)	Enterobacterales (91347)	Gammaproteobacteria (1236)	Proteobacteria (1224)	Bacteria (2)	4.40403	5.53911
NZ_CP063009.1	0.0375603	0	294	21	circular	2020-10-13	Russia: Moscow		55.76	37.62	granulation tissue	Homo sapiens		IncR_1, DQ449578, |IncFIA(HI1)_1, AF250878,	IncF RST(F-:A13:B-):FIA(13);FIB(-);FIC(-);FII(-);FIIK(-);FIIS(-);FIIY(-)	103524	49.7778	Klebsiella pneumoniae	Klebsiella pneumoniae (573)	Klebsiella (570)	Enterobacteriaceae (543)	Enterobacterales (91347)	Gammaproteobacteria (1236)	Proteobacteria (1224)	Bacteria (2)	4.38722	5.58534
NC_010886.1	0.0389696	0	283	22	circular	2008-06-17								IncR_1, DQ449578, |IncFIA(HI1)_1, AF250878,	IncF RST(F-:A13:B-):FIA(13);FIB(-);FIC(-);FII(-);FIIK(-);FIIS(-);FIIY(-)	98264	51.7931	Klebsiella pneumoniae	Klebsiella pneumoniae (573)	Klebsiella (570)	Enterobacteriaceae (543)	Enterobacterales (91347)	Gammaproteobacteria (1236)	Proteobacteria (1224)	Bacteria (2)	4.43244	5.52064
NZ_LC549808.1	0.0400373	0	275	23	circular	2020-08-04	Viet Nam:Ho Chi Minh		11	107		Homo sapiens		IncR_1, DQ449578, |IncFIA(HI1)_1, AF250878,	IncF RST(F-:A13:B-):FIA(13);FIB(-);FIC(-);FII(-);FIIK(-);FIIS(-);FIIY(-)	124069	52.2637	Klebsiella pneumoniae	Klebsiella pneumoniae (573)	Klebsiella (570)	Enterobacteriaceae (543)	Enterobacterales (91347)	Gammaproteobacteria (1236)	Proteobacteria (1224)	Bacteria (2)	4.40914	5.58963
CP052410.1	0.0405854	0	271	24	circular	2020-05-04	South Korea: Gangwon		37.82	128.16	blood	Homo sapiens		IncR_1, DQ449578, |IncFIA(HI1)_1, AF250878,	IncF RST(F-:A13:B-):FIA(13);FIB(-);FIC(-);FII(-);FIIK(-);FIIS(-);FIIY(-)	63010	52.0346	Klebsiella pneumoniae	Klebsiella pneumoniae (573)	Klebsiella (570)	Enterobacteriaceae (543)	Enterobacterales (91347)	Gammaproteobacteria (1236)	Proteobacteria (1224)	Bacteria (2)	4.44858	5.60719
CP052479.1	0.0408631	0	269	25	circular	2020-05-04	South Korea: Gangwon		37.82	128.16	blood	Homo sapiens		IncR_1, DQ449578, |IncFIA(HI1)_1, AF250878,	IncF RST(F-:A13:B-):FIA(13);FIB(-);FIC(-);FII(-);FIIK(-);FIIS(-);FIIY(-)	62715	52.0418	Klebsiella pneumoniae	Klebsiella pneumoniae (573)	Klebsiella (570)	Enterobacteriaceae (543)	Enterobacterales (91347)	Gammaproteobacteria (1236)	Proteobacteria (1224)	Bacteria (2)	4.43301	5.57813
NZ_CP018448.1	0.041003	0	268	26	circular	2016-12-19	Germany: Goettingen		51.5392	9.91156	wound swab	Homo sapiens		IncFIA(HI1)_1, AF250878, |IncR_1, DQ449578,	IncF RST(F-:A13:B-):FIA(13);FIB(-);FIC(-);FII(-);FIIK(-);FIIS(-);FIIY(-)	90685	53.1709	Klebsiella pneumoniae	Klebsiella pneumoniae (573)	Klebsiella (570)	Enterobacteriaceae (543)	Enterobacterales (91347)	Gammaproteobacteria (1236)	Proteobacteria (1224)	Bacteria (2)	4.41609	5.53424
NZ_CP018451.1	0.041003	0	268	27	circular	2016-12-19	Germany: Goettingen		51.5392	9.91156	urine sample	Homo sapiens		IncR_1, DQ449578, |IncFIA(HI1)_1, AF250878,	IncF RST(F-:A13:B-):FIA(13);FIB(-);FIC(-);FII(-);FIIK(-);FIIS(-);FIIY(-)	90684	53.1692	Klebsiella pneumoniae	Klebsiella pneumoniae (573)	Klebsiella (570)	Enterobacteriaceae (543)	Enterobacterales (91347)	Gammaproteobacteria (1236)	Proteobacteria (1224)	Bacteria (2)	4.42734	5.45205
NZ_CP023943.1	0.0430292	0	254	28	circular	2017-10-20	Canada:BC	Canada,BC	55.0013	-125.002	wound	Homo sapiens		IncFIB(K)_1, JN233704, |IncFII(K)_1, CP000648,	IncF RST(K1:A-:B-):FIA(-);FIB(-);FIC(-);FII(-);FIIK(1);FIIS(-);FIIY(-)	196733	52.1727	Klebsiella pneumoniae	Klebsiella pneumoniae (573)	Klebsiella (570)	Enterobacteriaceae (543)	Enterobacterales (91347)	Gammaproteobacteria (1236)	Proteobacteria (1224)	Bacteria (2)	6.07168	7.88902
NZ_CP024566.1	0.0442483	0	246	29	circular	2017-11-08								IncFIA(HI1)_1, AF250878, |IncR_1, DQ449578,	IncF RST(F-:A13:B-):FIA(13);FIB(-);FIC(-);FII(-);FIIK(-);FIIS(-);FIIY(-)	89345	50.6811	Klebsiella pneumoniae	Klebsiella pneumoniae (573)	Klebsiella (570)	Enterobacteriaceae (543)	Enterobacterales (91347)	Gammaproteobacteria (1236)	Proteobacteria (1224)	Bacteria (2)	4.47226	5.62322
NZ_CP024573.1	0.0442483	0	246	30	circular	2017-11-08								IncFIA(HI1)_1, AF250878, |IncR_1, DQ449578,	IncF RST(F-:A13:B-):FIA(13);FIB(-);FIC(-);FII(-);FIIK(-);FIIS(-);FIIY(-)	90173	50.6948	Klebsiella pneumoniae	Klebsiella pneumoniae (573)	Klebsiella (570)	Enterobacteriaceae (543)	Enterobacterales (91347)	Gammaproteobacteria (1236)	Proteobacteria (1224)	Bacteria (2)	4.42564	5.56628
NZ_CP024524.1	0.0442483	0	246	31	circular	2017-11-09								IncFIA(HI1)_1, AF250878, |IncR_1, DQ449578,	IncF RST(F-:A13:B-):FIA(13);FIB(-);FIC(-);FII(-);FIIK(-);FIIS(-);FIIY(-)	89345	50.6799	Klebsiella pneumoniae	Klebsiella pneumoniae (573)	Klebsiella (570)	Enterobacteriaceae (543)	Enterobacterales (91347)	Gammaproteobacteria (1236)	Proteobacteria (1224)	Bacteria (2)	4.42409	5.55823
NZ_CP024194.1	0.0442483	0	246	32	circular	2017-11-05	Australia: Melbourne		-37.8457	144.982	rectal swab	Homo sapiens		IncFIA(HI1)_1, AF250878, |IncR_1, DQ449578,	IncF RST(F-:A13:B-):FIA(13);FIB(-);FIC(-);FII(-);FIIK(-);FIIS(-);FIIY(-)	89345	50.6811	Klebsiella pneumoniae	Klebsiella pneumoniae (573)	Klebsiella (570)	Enterobacteriaceae (543)	Enterobacterales (91347)	Gammaproteobacteria (1236)	Proteobacteria (1224)	Bacteria (2)	4.43938	5.57347
NZ_CP026018.1	0.0453547	0	239	33	circular	2019-11-05	China	China	34.4118	86.0327		Homo sapiens	cell culture	IncFIA(HI1)_1, AF250878, |IncR_1, DQ449578,	IncF RST(F-:A13:B-):FIA(13);FIB(-);FIC(-);FII(-);FIIK(-);FIIS(-);FIIY(-)	76297	53.8632	Klebsiella pneumoniae	Klebsiella pneumoniae (573)	Klebsiella (570)	Enterobacteriaceae (543)	Enterobacterales (91347)	Gammaproteobacteria (1236)	Proteobacteria (1224)	Bacteria (2)	4.38302	5.54636
NZ_CP028991.1	0.0461689	0	234	34	circular	2018-05-02	missing				missing	missing		IncFIB(pQil)_1, JN233705,	IncF RST(F-:A-:B-):FIA(-);FIB(-);FIC(-);FII(-);FIIK(-);FIIS(-);FIIY(-)	85698	51.4971	Klebsiella pneumoniae	Klebsiella pneumoniae (573)	Klebsiella (570)	Enterobacteriaceae (543)	Enterobacterales (91347)	Gammaproteobacteria (1236)	Proteobacteria (1224)	Bacteria (2)	4.94284	5.86106
NZ_CP029135.1	0.0470041	0	229	35	circular	2018-05-02	missing				missing	missing		IncFIA(HI1)_1, AF250878, |IncR_1, DQ449578,	IncF RST(F-:A13:B-):FIA(13);FIB(-);FIC(-);FII(-);FIIK(-);FIIS(-);FIIY(-)	70613	51.6151	Klebsiella pneumoniae	Klebsiella pneumoniae (573)	Klebsiella (570)	Enterobacteriaceae (543)	Enterobacterales (91347)	Gammaproteobacteria (1236)	Proteobacteria (1224)	Bacteria (2)	4.45047	5.58057
NZ_CP041086.1	0.0473443	0	227	36	circular	2019-06-28	not applicable				not applicable	not applicable		IncFIA(HI1)_1, AF250878, |IncR_1, DQ449578,	IncF RST(F-:A13:B-):FIA(13);FIB(-);FIC(-);FII(-);FIIK(-);FIIS(-);FIIY(-)	61718	52.3381	Klebsiella pneumoniae	Klebsiella pneumoniae (573)	Klebsiella (570)	Enterobacteriaceae (543)	Enterobacterales (91347)	Gammaproteobacteria (1236)	Proteobacteria (1224)	Bacteria (2)	4.47329	5.5415
NZ_CP047337.1	0.0491	0	217	37	circular	2020-03-04	China: Sichuan province		30.41	104.11	a feces sample of chicken origin			IncFIB(K)_1, JN233704, |IncFII(pKP91)_1, CP000966, |IncFIA(HI1)_1, AF250878, |IncFII(K)_1, CP000648,	IncF RST(K-:A-:B-):FIA(~21);FIB(-);FIC(-);FII(-);FIIK(1,7);FIIS(-);FIIY(-)	345655	52.2793	Klebsiella pneumoniae	Klebsiella pneumoniae (573)	Klebsiella (570)	Enterobacteriaceae (543)	Enterobacterales (91347)	Gammaproteobacteria (1236)	Proteobacteria (1224)	Bacteria (2)	6.02648	7.89659
NZ_CP021688.1	0.0505746	0	209	38	circular	2017-06-10	missing				missing	missing		IncFIA(HI1)_1, AF250878, |IncR_1, DQ449578,	IncF RST(F-:A13:B-):FIA(13);FIB(-);FIC(-);FII(-);FIIK(-);FIIS(-);FIIY(-)	90199	51.8964	Klebsiella pneumoniae	Klebsiella pneumoniae (573)	Klebsiella (570)	Enterobacteriaceae (543)	Enterobacterales (91347)	Gammaproteobacteria (1236)	Proteobacteria (1224)	Bacteria (2)	4.42466	5.56745
MN543573.1	0.0507636	0	208	39	circular	2020-06-12								IncFIB(K)_1, JN233704, |IncFII(K)_1, CP000648,	IncF RST(K1:A-:B-):FIA(-);FIB(-);FIC(-);FII(-);FIIK(1);FIIS(-);FIIY(-)	216159	52.5021	Klebsiella pneumoniae	Klebsiella pneumoniae (573)	Klebsiella (570)	Enterobacteriaceae (543)	Enterobacterales (91347)	Gammaproteobacteria (1236)	Proteobacteria (1224)	Bacteria (2)	6.01167	7.92784
NZ_CP018737.1	0.0511448	0	206	40	linear	2016-12-22	Germany: Goettingen		51.5392	9.91156	urine sample	Homo sapiens		IncFIA(HI1)_1, AF250878, |IncR_1, DQ449578,	IncF RST(F-:A13:B-):FIA(13);FIB(-);FIC(-);FII(-);FIIK(-);FIIS(-);FIIY(-)	72952	52.7511	Klebsiella pneumoniae	Klebsiella pneumoniae (573)	Klebsiella (570)	Enterobacteriaceae (543)	Enterobacterales (91347)	Gammaproteobacteria (1236)	Proteobacteria (1224)	Bacteria (2)	4.44334	5.59561
NZ_CP020091.1	0.0519203	0	202	41	circular	2018-03-14	Viet Nam		10.77	106.68	urine	Homo sapiens		IncFIA(HI1)_1, AF250878,	IncF RST(F-:A13:B-):FIA(13);FIB(-);FIC(-);FII(-);FIIK(-);FIIS(-);FIIY(-)	84602	50.2506	Enterobacter cloacae	Enterobacter cloacae (550)	Enterobacter (547)	Enterobacteriaceae (543)	Enterobacterales (91347)	Gammaproteobacteria (1236)	Proteobacteria (1224)	Bacteria (2)	4.4244	5.59279
NZ_CP063012.1	0.052117	0	201	42	circular	2020-10-13	Russia: Moscow		55.76	37.62	blood	Homo sapiens		IncFIA(HI1)_1, AF250878, |IncR_1, DQ449578, |IncM2_1, AF550415,	IncF RST(F-:A13:B-):FIA(13);FIB(-);FIC(-);FII(-);FIIK(-);FIIS(-);FIIY(-)	164278	50.613	Klebsiella pneumoniae	Klebsiella pneumoniae (573)	Klebsiella (570)	Enterobacteriaceae (543)	Enterobacterales (91347)	Gammaproteobacteria (1236)	Proteobacteria (1224)	Bacteria (2)	-3.94643	8.82073
NZ_CP028179.1	0.0523149	0	200	43	circular	2018-04-05	Germany	Germany	51.0834	10.4234	missing	Homo sapiens		IncR_1, DQ449578,		38695	52.6812	Klebsiella pneumoniae	Klebsiella pneumoniae (573)	Klebsiella (570)	Enterobacteriaceae (543)	Enterobacterales (91347)	Gammaproteobacteria (1236)	Proteobacteria (1224)	Bacteria (2)	4.44341	5.47907
NZ_CP060423.1	0.0535266	0	194	44	circular	2020-06-01	India		12.9246	79.1348	blood	Homo sapiens		IncR_1, DQ449578,		74731	50.0234	Klebsiella pneumoniae	Klebsiella pneumoniae (573)	Klebsiella (570)	Enterobacteriaceae (543)	Enterobacterales (91347)	Gammaproteobacteria (1236)	Proteobacteria (1224)	Bacteria (2)	4.42323	5.52046
NZ_CP028955.1	0.0535266	0	194	45	circular	2018-04-28	missing				missing	missing		IncR_1, DQ449578, |IncFII(K)_1, CP000648, |IncFIB(pQil)_1, JN233705,	IncF RST(K2:A-:B-):FIA(-);FIB(-);FIC(-);FII(-);FIIK(2);FIIS(-);FIIY(-)	134346	52.8933	Klebsiella pneumoniae	Klebsiella pneumoniae (573)	Klebsiella (570)	Enterobacteriaceae (543)	Enterobacterales (91347)	Gammaproteobacteria (1236)	Proteobacteria (1224)	Bacteria (2)	4.7425	5.71105
NZ_CP025578.1	0.0539403	0	192	46	circular	2019-01-12	Sweden: Stockholm	Sweden,Stockholm	59.3251	18.0711		Homo sapiens	Bacterial isolate	IncFIA(HI1)_1, AF250878, |IncR_1, DQ449578,	IncF RST(F-:A13:B-):FIA(13);FIB(-);FIC(-);FII(-);FIIK(-);FIIS(-);FIIY(-)	80272	52.418	Klebsiella pneumoniae	Klebsiella pneumoniae (573)	Klebsiella (570)	Enterobacteriaceae (543)	Enterobacterales (91347)	Gammaproteobacteria (1236)	Proteobacteria (1224)	Bacteria (2)	4.42683	5.49053
NZ_AP021911.1	0.054149	0	191	47	circular	2020-08-13	Japan:Tokyo		35.664	139.438				IncFIA(HI1)_1, AF250878, |IncR_1, DQ449578,	IncF RST(F-:A13:B-):FIA(13);FIB(-);FIC(-);FII(-);FIIK(-);FIIS(-);FIIY(-)	80272	52.418	Klebsiella pneumoniae	Klebsiella pneumoniae (573)	Klebsiella (570)	Enterobacteriaceae (543)	Enterobacterales (91347)	Gammaproteobacteria (1236)	Proteobacteria (1224)	Bacteria (2)	4.50137	5.5224
NZ_AP023150.1	0.0558655	0	183	48	circular	2020-06-05	Japan:Sapporo	Japan,Sapporo	43.0614	141.355		Homo sapiens		IncFII(K)_1, CP000648, |IncQ1_1, M28829,	IncF RST(K2:A-:B-):FIA(-);FIB(-);FIC(-);FII(-);FIIK(2);FIIS(-);FIIY(-)	86902	52.5442	Klebsiella pneumoniae	Klebsiella pneumoniae (573)	Klebsiella (570)	Enterobacteriaceae (543)	Enterobacterales (91347)	Gammaproteobacteria (1236)	Proteobacteria (1224)	Bacteria (2)	6.29572	6.75418
NZ_CP006662.2	0.056983	0	178	49	circular	2015-01-21	USA		40.423	-98.7372	hospital patients			IncFIA(HI1)_1, AF250878, |IncR_1, DQ449578,	IncF RST(F-:A13:B-):FIA(13);FIB(-);FIC(-);FII(-);FIIK(-);FIIS(-);FIIY(-)	85161	52.7389	Klebsiella pneumoniae	Klebsiella pneumoniae (573)	Klebsiella (570)	Enterobacteriaceae (543)	Enterobacterales (91347)	Gammaproteobacteria (1236)	Proteobacteria (1224)	Bacteria (2)	4.43749	5.51418
NZ_CP018819.1	0.056983	0	178	50	circular	2016-12-28	missing				missing	missing		IncFIA(HI1)_1, AF250878, |IncR_1, DQ449578,	IncF RST(F-:A13:B-):FIA(13);FIB(-);FIC(-);FII(-);FIIK(-);FIIS(-);FIIY(-)	85161	52.7354	Klebsiella pneumoniae	Klebsiella pneumoniae (573)	Klebsiella (570)	Enterobacteriaceae (543)	Enterobacterales (91347)	Gammaproteobacteria (1236)	Proteobacteria (1224)	Bacteria (2)	4.42837	5.52055
NZ_MN218814.1	0.0572108	0	177	51	circular	2020-08-04								IncFIA(HI1)_1, AF250878, |IncR_1, DQ449578,	IncF RST(F-:A-:B-):FIA(-);FIB(-);FIC(-);FII(-);FIIK(-);FIIS(-);FIIY(-)	83654	52.7148	Klebsiella pneumoniae	Klebsiella pneumoniae (573)	Klebsiella (570)	Enterobacteriaceae (543)	Enterobacterales (91347)	Gammaproteobacteria (1236)	Proteobacteria (1224)	Bacteria (2)	4.3934	5.51129
NZ_MN241904.1	0.0574401	0	176	52	circular	2020-06-04								IncN_1, AY046276,	IncN MLST(5):repN(2);traJ(3);korA(2)	62060	51.1473	Salmonella enterica subsp. enterica serovar Typhimurium	Salmonella enterica (28901)	Salmonella (590)	Enterobacteriaceae (543)	Enterobacterales (91347)	Gammaproteobacteria (1236)	Proteobacteria (1224)	Bacteria (2)	3.47953	5.20581
NZ_MN543572.1	0.0574401	0	176	53	circular	2020-08-04								IncR_1, DQ449578, |IncFIA(HI1)_1, AF250878,	IncF RST(F-:A13:B-):FIA(13);FIB(-);FIC(-);FII(-);FIIK(-);FIIS(-);FIIY(-)	70382	52.978	Klebsiella pneumoniae	Klebsiella pneumoniae (573)	Klebsiella (570)	Enterobacteriaceae (543)	Enterobacterales (91347)	Gammaproteobacteria (1236)	Proteobacteria (1224)	Bacteria (2)	4.3291	5.40842
NZ_CP011576.1	0.0588483	0	170	54	circular	2015-06-18	USA:Virginia		38.14	-78.45	sputum	Homo sapiens		IncR_1, DQ449578,		49832	52.2355	Klebsiella pneumoniae	Klebsiella pneumoniae (573)	Klebsiella (570)	Enterobacteriaceae (543)	Enterobacterales (91347)	Gammaproteobacteria (1236)	Proteobacteria (1224)	Bacteria (2)	4.42429	5.55473
NZ_CP035182.1	0.0590885	0	169	55	circular	2019-01-22	India		12.9165	79.1325	blood	Homo sapiens		IncR_1, DQ449578,		79592	52.3545	Klebsiella pneumoniae	Klebsiella pneumoniae (573)	Klebsiella (570)	Enterobacteriaceae (543)	Enterobacterales (91347)	Gammaproteobacteria (1236)	Proteobacteria (1224)	Bacteria (2)	4.44787	5.55482
NC_019888.1	0.0593303	0	168	56	circular	2012-12-31								IncN_1, AY046276,	IncN MLST(6):repN(2);traJ(4);korA(2)	83712	53.4571	Klebsiella pneumoniae	Klebsiella pneumoniae (573)	Klebsiella (570)	Enterobacteriaceae (543)	Enterobacterales (91347)	Gammaproteobacteria (1236)	Proteobacteria (1224)	Bacteria (2)	3.55759	5.40896
NC_011617.1	0.0603145	0	164	57	circular	2008-12-03								IncN_1, AY046276,	IncN MLST(5):repN(2);traJ(3);korA(2)	67850	52.5571	Klebsiella pneumoniae	Klebsiella pneumoniae (573)	Klebsiella (570)	Enterobacteriaceae (543)	Enterobacterales (91347)	Gammaproteobacteria (1236)	Proteobacteria (1224)	Bacteria (2)	3.57913	5.12907
NZ_CP047966.1	0.0603145	0	164	58	circular	2020-11-05								IncP6_1, JF785550, |IncR_1, DQ449578, |IncFIA(HI1)_1, AF250878, |ColRNAI_1, DQ298019,	IncF RST(F-:A13:B-):FIA(13);FIB(-);FIC(-);FII(-);FIIK(-);FIIS(-);FIIY(-)	133022	55.7351	Enterobacter hormaechei	Enterobacter hormaechei (158836)	Enterobacter (547)	Enterobacteriaceae (543)	Enterobacterales (91347)	Gammaproteobacteria (1236)	Proteobacteria (1224)	Bacteria (2)	4.35897	5.50604
NZ_CP041444.1	0.0608169	0	162	59	circular	2019-10-07	China: Yangzhou		32.24	119.26	Pork			IncX1_1, EU370913, |IncR_1, DQ449578,		78706	51.1244	Escherichia coli	Escherichia coli (562)	Escherichia (561)	Enterobacteriaceae (543)	Enterobacterales (91347)	Gammaproteobacteria (1236)	Proteobacteria (1224)	Bacteria (2)	4.66868	5.01211
NZ_CP050155.1	0.0613264	0	160	60	circular	2020-07-31	Hong Kong	Hong Kong	22.3506	114.185	sputum	Homo sapiens		IncFII(K)_1, CP000648,	IncF RST(K7:A-:B-):FIA(-);FIB(-);FIC(-);FII(-);FIIK(7);FIIS(-);FIIY(-)	130570	52.6285	Klebsiella quasipneumoniae	Klebsiella quasipneumoniae (1463165)	Klebsiella (570)	Enterobacteriaceae (543)	Enterobacterales (91347)	Gammaproteobacteria (1236)	Proteobacteria (1224)	Bacteria (2)	6.11181	6.64446
NZ_CP029723.1	0.0626325	0	155	61	circular	2018-06-16	missing				missing	missing		IncFIB(pQil)_1, JN233705, |IncR_1, DQ449578, |IncFII(K)_1, CP000648,	IncF RST(K2:A-:B-):FIA(-);FIB(-);FIC(-);FII(-);FIIK(2);FIIS(-);FIIY(-)	183663	52.8936	Klebsiella pneumoniae	Klebsiella pneumoniae (573)	Klebsiella (570)	Enterobacteriaceae (543)	Enterobacterales (91347)	Gammaproteobacteria (1236)	Proteobacteria (1224)	Bacteria (2)	4.93519	5.81873
NZ_MK248692.1	0.0634394	0	152	62	circular	2020-06-03								IncQ1_1, M28829, |IncFII(K)_1, CP000648, |IncR_1, DQ449578,	IncF RST(K2:A-:B-):FIA(-);FIB(-);FIC(-);FII(-);FIIK(2);FIIS(-);FIIY(-)	64394	53.828	Klebsiella pneumoniae	Klebsiella pneumoniae (573)	Klebsiella (570)	Enterobacteriaceae (543)	Enterobacterales (91347)	Gammaproteobacteria (1236)	Proteobacteria (1224)	Bacteria (2)	4.46522	5.01718
NZ_CP021953.1	0.0642645	0	149	63	circular	2017-06-22	missing				missing	missing		IncR_1, DQ449578,		69541	52.963	Klebsiella pneumoniae	Klebsiella pneumoniae (573)	Klebsiella (570)	Enterobacteriaceae (543)	Enterobacterales (91347)	Gammaproteobacteria (1236)	Proteobacteria (1224)	Bacteria (2)	4.41194	5.61452
CP043753.1	0.064825	0	147	64	circular	2019-09-15	USA:GA	USA,GA	32.3294	-83.1137	Ground Beef			IncR_1, DQ449578,		48263	55.7073	Escherichia coli	Escherichia coli (562)	Escherichia (561)	Enterobacteriaceae (543)	Enterobacterales (91347)	Gammaproteobacteria (1236)	Proteobacteria (1224)	Bacteria (2)	4.48673	4.91884
NZ_CP028853.1	0.0656822	0	144	65	circular	2020-11-10	China:Qingdao		37.09	121	sputum	Homo sapiens		IncFII(K)_1, CP000648,	IncF RST(K2:A-:B-):FIA(-);FIB(-);FIC(-);FII(-);FIIK(2);FIIS(-);FIIY(-)	94396	52.551	Klebsiella pneumoniae	Klebsiella pneumoniae (573)	Klebsiella (570)	Enterobacteriaceae (543)	Enterobacterales (91347)	Gammaproteobacteria (1236)	Proteobacteria (1224)	Bacteria (2)	6.30597	6.7421
NZ_CP021712.1	0.0665597	0	141	66	circular	2017-06-10	missing				missing	missing		IncR_1, DQ449578, |IncFIA(HI1)_1, AF250878,	IncF RST(F-:A13:B-):FIA(13);FIB(-);FIC(-);FII(-);FIIK(-);FIIS(-);FIIY(-)	70457	52.9018	Klebsiella pneumoniae	Klebsiella pneumoniae (573)	Klebsiella (570)	Enterobacteriaceae (543)	Enterobacterales (91347)	Gammaproteobacteria (1236)	Proteobacteria (1224)	Bacteria (2)	4.44389	5.5374
CP027606.1	0.0665597	0	141	67	circular	2018-03-19	missing				missing	missing		IncFIA(HI1)_1, AF250878,	IncF RST(F-:A13:B-):FIA(13);FIB(-);FIC(-);FII(-);FIIK(-);FIIS(-);FIIY(-)	87025	54.0695	Enterobacter cloacae	Enterobacter cloacae (550)	Enterobacter (547)	Enterobacteriaceae (543)	Enterobacterales (91347)	Gammaproteobacteria (1236)	Proteobacteria (1224)	Bacteria (2)	4.36159	5.17
NZ_CP031259.1	0.0665597	0	141	68	circular	2018-09-08	China		40.22	116.2	bronchoalveolar lavage fluid	Homo sapiens		IncN_1, AY046276,	IncN MLST(-):repN(~6);traJ(6);korA(2)	59149	51.2756	Klebsiella quasipneumoniae	Klebsiella quasipneumoniae (1463165)	Klebsiella (570)	Enterobacteriaceae (543)	Enterobacterales (91347)	Gammaproteobacteria (1236)	Proteobacteria (1224)	Bacteria (2)	3.46079	5.33183
NZ_MN543570.1	0.0668569	0	140	69	circular	2020-06-04								IncFII(K)_1, CP000648, |IncQ1_1, M28829,	IncF RST(K2:A-:B-):FIA(-);FIB(-);FIC(-);FII(-);FIIK(2);FIIS(-);FIIY(-)	140566	52.5917	Klebsiella pneumoniae	Klebsiella pneumoniae (573)	Klebsiella (570)	Enterobacteriaceae (543)	Enterobacterales (91347)	Gammaproteobacteria (1236)	Proteobacteria (1224)	Bacteria (2)	6.33204	6.78616
NZ_CP026753.1	0.0668569	0	140	70	circular	2018-03-03	missing				missing	missing		IncR_1, DQ449578, |IncFIA(HI1)_1, AF250878,	IncF RST(F-:A13:B-):FIA(13);FIB(-);FIC(-);FII(-);FIIK(-);FIIS(-);FIIY(-)	70730	52.8305	Klebsiella pneumoniae	Klebsiella pneumoniae (573)	Klebsiella (570)	Enterobacteriaceae (543)	Enterobacterales (91347)	Gammaproteobacteria (1236)	Proteobacteria (1224)	Bacteria (2)	4.42184	5.54523
CP063884.1	0.0668569	0	140	71	circular	2020-11-08	China:Guangzhou		23.15	113.27	feces	wild chukar		IncR_1, DQ449578,		57825	56.479	Klebsiella pneumoniae	Klebsiella pneumoniae (573)	Klebsiella (570)	Enterobacteriaceae (543)	Enterobacterales (91347)	Gammaproteobacteria (1236)	Proteobacteria (1224)	Bacteria (2)	4.48854	4.94996
NZ_CP006801.1	0.0671564	0	139	72	circular	2015-03-01								IncR_1, DQ449578, |IncFIA(HI1)_1, AF250878,	IncF RST(F-:A13:B-):FIA(13);FIB(-);FIC(-);FII(-);FIIK(-);FIIS(-);FIIY(-)	70814	52.9217	Klebsiella pneumoniae subsp. pneumoniae PittNDM01	Klebsiella pneumoniae (573)	Klebsiella (570)	Enterobacteriaceae (543)	Enterobacterales (91347)	Gammaproteobacteria (1236)	Proteobacteria (1224)	Bacteria (2)	4.42412	5.52861
NZ_CP028931.1	0.0671564	0	139	73	circular	2018-04-25	missing				missing	missing		IncFIA(HI1)_1, AF250878, |IncR_1, DQ449578,	IncF RST(F-:A13:B-):FIA(13);FIB(-);FIC(-);FII(-);FIIK(-);FIIS(-);FIIY(-)	70829	52.919	Klebsiella pneumoniae	Klebsiella pneumoniae (573)	Klebsiella (570)	Enterobacteriaceae (543)	Enterobacterales (91347)	Gammaproteobacteria (1236)	Proteobacteria (1224)	Bacteria (2)	4.44117	5.53882
NZ_AP019668.1	0.0671564	0	139	74	circular	2020-03-01	not applicable							IncFIA(HI1)_1, AF250878, |IncR_1, DQ449578,	IncF RST(F-:A13:B-):FIA(13);FIB(-);FIC(-);FII(-);FIIK(-);FIIS(-);FIIY(-)	81239	52.1104	Klebsiella pneumoniae	Klebsiella pneumoniae (573)	Klebsiella (570)	Enterobacteriaceae (543)	Enterobacterales (91347)	Gammaproteobacteria (1236)	Proteobacteria (1224)	Bacteria (2)	4.43842	5.55934
NZ_CP016919.1	0.0671564	0	139	75	circular	2016-08-26	USA: Pennsylvania	USA,Pennsylvania	40.97	-77.7279	urine	Homo sapiens		IncFIA(HI1)_1, AF250878, |IncR_1, DQ449578,	IncF RST(F-:A13:B-):FIA(13);FIB(-);FIC(-);FII(-);FIIK(-);FIIS(-);FIIY(-)	70830	52.9183	Klebsiella pneumoniae	Klebsiella pneumoniae (573)	Klebsiella (570)	Enterobacteriaceae (543)	Enterobacterales (91347)	Gammaproteobacteria (1236)	Proteobacteria (1224)	Bacteria (2)	4.42652	5.5698
NZ_CP036311.1	0.0674584	0	138	76	circular	2019-02-21	China: Chengdu, Sichuan	China,Chengdu,Sichuan	30.6428	104.068		Homo sapiens	Pure Culture	IncFIB(K)_1, JN233704, |IncR_1, DQ449578, |IncFIA(HI1)_1, AF250878,	IncF RST(F-:A13:B-):FIA(13);FIB(-);FIC(-);FII(-);FIIK(-);FIIS(-);FIIY(-)	102543	52.9232	Enterobacter hormaechei	Enterobacter hormaechei (158836)	Enterobacter (547)	Enterobacteriaceae (543)	Enterobacterales (91347)	Gammaproteobacteria (1236)	Proteobacteria (1224)	Bacteria (2)	4.12266	6.03388
NZ_CP023250.1	0.0677629	0	137	77	linear	2018-06-08	Sweden: Gothenburg		57.6823	11.9613	urine	Homo sapiens		IncR_1, DQ449578,		65276	53.9402	Klebsiella pneumoniae	Klebsiella pneumoniae (573)	Klebsiella (570)	Enterobacteriaceae (543)	Enterobacterales (91347)	Gammaproteobacteria (1236)	Proteobacteria (1224)	Bacteria (2)	4.4508	5.53641
NZ_CP034757.1	0.0677629	0	137	78	circular	2020-01-15	USA	USA	39.7837	-100.446		Homo sapiens		IncFIA(HI1)_1, AF250878,	IncF RST(F-:A13:B-):FIA(13);FIB(-);FIC(-);FII(-);FIIK(-);FIIS(-);FIIY(-)	28640	48.6906	Enterobacter hormaechei subsp. hoffmannii	Enterobacter hormaechei (158836)	Enterobacter (547)	Enterobacteriaceae (543)	Enterobacterales (91347)	Gammaproteobacteria (1236)	Proteobacteria (1224)	Bacteria (2)	4.44747	5.5014
NZ_CP061843.1	0.0680698	0	136	79	circular	2020-10-06	China: Henan	China,Henan	34	114	feces	chicken	cell culture	IncFII(K)_1, CP000648,	IncF RST(K2:A-:B-):FIA(-);FIB(-);FIC(-);FII(-);FIIK(2);FIIS(-);FIIY(-)	173471	53.5444	Klebsiella pneumoniae	Klebsiella pneumoniae (573)	Klebsiella (570)	Enterobacteriaceae (543)	Enterobacterales (91347)	Gammaproteobacteria (1236)	Proteobacteria (1224)	Bacteria (2)	6.33091	6.78258
NZ_CP025966.2	0.0686914	0	134	80	circular	2018-02-01	China: Sichuan, Chengdu	China,Sichuan,Chengdu	30.6766	104.061		Homo sapiens	Culture	IncFII(K)_1, CP000648, |IncQ1_1, M28829,	IncF RST(K2:A-:B-):FIA(-);FIB(-);FIC(-);FII(-);FIIK(2);FIIS(-);FIIY(-)	130691	52.9547	Klebsiella pneumoniae	Klebsiella pneumoniae (573)	Klebsiella (570)	Enterobacteriaceae (543)	Enterobacterales (91347)	Gammaproteobacteria (1236)	Proteobacteria (1224)	Bacteria (2)	6.3125	6.79316
NZ_CP042581.1	0.0693234	0	132	81	circular	2019-10-13	Australia: Sydney	Australia,Sydney	-33.8548	151.216	clinical sample	Homo sapiens	Whole organism	IncN_1, AY046276,	IncN MLST(5):repN(2);traJ(3);korA(2)	44630	51.5752	Enterobacter kobei	Enterobacter kobei (208224)	Enterobacter (547)	Enterobacteriaceae (543)	Enterobacterales (91347)	Gammaproteobacteria (1236)	Proteobacteria (1224)	Bacteria (2)	3.53042	5.2285
NZ_CP025517.1	0.0693234	0	132	82	circular	2019-04-03	Switzerland: Basel		47.5	7.6				IncFIA(HI1)_1, AF250878, |IncR_1, DQ449578,	IncF RST(F-:A13:B-):FIA(13);FIB(-);FIC(-);FII(-);FIIK(-);FIIS(-);FIIY(-)	77809	53.0286	Klebsiella pneumoniae	Klebsiella pneumoniae (573)	Klebsiella (570)	Enterobacteriaceae (543)	Enterobacterales (91347)	Gammaproteobacteria (1236)	Proteobacteria (1224)	Bacteria (2)	4.45535	5.52919
NZ_CP020856.1	0.0693234	0	132	83	circular	2017-05-25	USA: Houston		29.7107	-95.4006	respiratory	Homo sapiens		IncFIA(HI1)_1, AF250878, |IncR_1, DQ449578,	IncF RST(F-:A13:B-):FIA(13,13);FIB(-);FIC(-);FII(-);FIIK(-);FIIS(-);FIIY(-)	76158	53.3601	Klebsiella pneumoniae	Klebsiella pneumoniae (573)	Klebsiella (570)	Enterobacteriaceae (543)	Enterobacterales (91347)	Gammaproteobacteria (1236)	Proteobacteria (1224)	Bacteria (2)	4.43775	5.54739
NZ_CP021761.1	0.0696435	0	131	84	circular	2017-06-15	missing				missing	missing		IncR_1, DQ449578,		79767	52.4766	Klebsiella pneumoniae	Klebsiella pneumoniae (573)	Klebsiella (570)	Enterobacteriaceae (543)	Enterobacterales (91347)	Gammaproteobacteria (1236)	Proteobacteria (1224)	Bacteria (2)	4.45892	5.44359
NC_020086.1	0.0696435	0	131	85	circular	2013-01-07								FII(pBK30683)_1, KF954760, |IncN_1, AY046276, |Col(pHAD28)_1, KU674895,	IncN MLST(6):repN(2);traJ(4);korA(2)	80105	51.2477	Escherichia coli	Escherichia coli (562)	Escherichia (561)	Enterobacteriaceae (543)	Enterobacterales (91347)	Gammaproteobacteria (1236)	Proteobacteria (1224)	Bacteria (2)	3.26195	5.23211
CP040445.1	0.0699663	0	130	86	circular	2020-06-30	China: Chengdu, Sichuan	China,Chengdu,Sichuan	30.6428	104.068		Homo sapiens	Pure Culture	IncFII(K)_1, CP000648, |IncQ1_1, M28829,	IncF RST(K2:A-:B-):FIA(-);FIB(-);FIC(-);FII(-);FIIK(2);FIIS(-);FIIY(-)	91675	53.117	Klebsiella pneumoniae	Klebsiella pneumoniae (573)	Klebsiella (570)	Enterobacteriaceae (543)	Enterobacterales (91347)	Gammaproteobacteria (1236)	Proteobacteria (1224)	Bacteria (2)	6.28281	6.73455
NZ_CP021698.1	0.0699663	0	130	87	circular	2017-06-10	missing				missing	missing		IncR_1, DQ449578,		87411	51.9157	Klebsiella pneumoniae	Klebsiella pneumoniae (573)	Klebsiella (570)	Enterobacteriaceae (543)	Enterobacterales (91347)	Gammaproteobacteria (1236)	Proteobacteria (1224)	Bacteria (2)	4.71981	5.80294
CP056317.1	0.0699663	0	130	88	circular	2020-07-27	United Kingdom	United Kingdom	54.7024	-3.27658	Freshwater sample from downstream of wastewater treatment plant		culture	IncN_1, AY046276,	IncN MLST(5):repN(2);traJ(3);korA(2)	55918	52.704	Escherichia coli	Escherichia coli (562)	Escherichia (561)	Enterobacteriaceae (543)	Enterobacterales (91347)	Gammaproteobacteria (1236)	Proteobacteria (1224)	Bacteria (2)	3.45173	5.26126
NZ_KX443408.1	0.0699663	0	130	89	circular	2020-06-03								IncR_1, DQ449578,		89790	51.5737	Klebsiella pneumoniae	Klebsiella pneumoniae (573)	Klebsiella (570)	Enterobacteriaceae (543)	Enterobacterales (91347)	Gammaproteobacteria (1236)	Proteobacteria (1224)	Bacteria (2)	4.48829	5.49564
NZ_CP033776.1	0.0702918	0	129	90	circular	2018-11-26	not applicable				Bronchoalveolar lavage from right lung	Homo sapiens		IncFIA(HI1)_1, AF250878,	IncF RST(F-:A13:B-):FIA(13);FIB(-);FIC(-);FII(-);FIIK(-);FIIS(-);FIIY(-)	73896	50.1908	Klebsiella pneumoniae	Klebsiella pneumoniae (573)	Klebsiella (570)	Enterobacteriaceae (543)	Enterobacterales (91347)	Gammaproteobacteria (1236)	Proteobacteria (1224)	Bacteria (2)	4.52791	5.47985
CP063857.1	0.0702918	0	129	91	circular	2020-11-08	China:Baoding		38.87	115.45	cows			IncQ1_1, M28829, |IncFII(K)_1, CP000648,	IncF RST(K2:A-:B-):FIA(-);FIB(-);FIC(-);FII(-);FIIK(2);FIIS(-);FIIY(-)	92970	52.9214	Klebsiella pneumoniae	Klebsiella pneumoniae (573)	Klebsiella (570)	Enterobacteriaceae (543)	Enterobacterales (91347)	Gammaproteobacteria (1236)	Proteobacteria (1224)	Bacteria (2)	6.31127	6.75595
NZ_CP019026.1	0.0706202	0	128	92	circular	2017-03-06	Colombia: Cali		3.45	-76.54		Homo sapiens		IncN_1, AY046276,	IncN MLST(5):repN(2);traJ(3);korA(2)	59373	52.1129	Escherichia coli	Escherichia coli (562)	Escherichia (561)	Enterobacteriaceae (543)	Enterobacterales (91347)	Gammaproteobacteria (1236)	Proteobacteria (1224)	Bacteria (2)	3.46081	5.22326
NZ_CP034325.1	0.0706202	0	128	93	circular	2018-12-14	China	China	34.4118	86.0327	blood		Blood sample	IncM1_1, U27345, |IncFII(K)_1, CP000648, |IncQ1_1, M28829,	IncF RST(K2:A-:B-):FIA(-);FIB(-);FIC(-);FII(-);FIIK(2);FIIS(-);FIIY(-)	156910	52.3829	Klebsiella pneumoniae	Klebsiella pneumoniae (573)	Klebsiella (570)	Enterobacteriaceae (543)	Enterobacterales (91347)	Gammaproteobacteria (1236)	Proteobacteria (1224)	Bacteria (2)	6.32013	6.76
NZ_CP026588.1	0.0712856	0	126	94	circular	2018-03-01	China:Nanchang	China,Nanchang	28.6793	115.889		Homo sapiens	tissue sample	IncFII(K)_1, CP000648,	IncF RST(K2:A-:B-):FIA(-);FIB(-);FIC(-);FII(-);FIIK(2);FIIS(-);FIIY(-)	126149	52.2517	Klebsiella pneumoniae	Klebsiella pneumoniae (573)	Klebsiella (570)	Enterobacteriaceae (543)	Enterobacterales (91347)	Gammaproteobacteria (1236)	Proteobacteria (1224)	Bacteria (2)	6.34816	6.79244
NZ_AP022350.1	0.0712856	0	126	95	circular	2020-08-04	Japan:Osaka	Japan,Osaka	34.6938	135.501		Homo sapiens		IncN_1, AY046276,	IncN MLST(-):repN(~2);traJ(-);korA(2)	33752	50.3585	Escherichia coli	Escherichia coli (562)	Escherichia (561)	Enterobacteriaceae (543)	Enterobacterales (91347)	Gammaproteobacteria (1236)	Proteobacteria (1224)	Bacteria (2)	3.54266	5.14164
CP052417.1	0.0712856	0	126	96	circular	2020-05-04	South Korea: Gangwon		37.82	128.16	blood	Homo sapiens		IncFIA(HI1)_1, AF250878, |IncR_1, DQ449578,	IncF RST(F-:A13:B-):FIA(13);FIB(-);FIC(-);FII(-);FIIK(-);FIIS(-);FIIY(-)	53334	53.225	Klebsiella pneumoniae	Klebsiella pneumoniae (573)	Klebsiella (570)	Enterobacteriaceae (543)	Enterobacterales (91347)	Gammaproteobacteria (1236)	Proteobacteria (1224)	Bacteria (2)	4.3924	5.52446
NZ_CP047093.1	0.0716227	0	125	97	circular	2020-01-26	China:Henan	China,Henan	34	114		pig	genomic DNA	IncX1_1, EU370913,		30069	50.8497	Salmonella sp. S13	Salmonella sp. S13 (2686305)	Salmonella (590)	Enterobacteriaceae (543)	Enterobacterales (91347)	Gammaproteobacteria (1236)	Proteobacteria (1224)	Bacteria (2)	4.81897	4.77103
CP052394.1	0.0719629	0	124	98	circular	2020-05-04	South Korea: Gangwon		37.82	128.16	blood	Homo sapiens		IncN_1, AY046276,	IncN MLST(5):repN(2);traJ(3);korA(2)	56619	52.9716	Klebsiella pneumoniae	Klebsiella pneumoniae (573)	Klebsiella (570)	Enterobacteriaceae (543)	Enterobacterales (91347)	Gammaproteobacteria (1236)	Proteobacteria (1224)	Bacteria (2)	3.4138	5.30098
NZ_CP035212.1	0.0719629	0	124	99	circular	2019-10-31	Thailand		13.7367	100.523	stool	Homo sapiens		IncR_1, DQ449578,		69596	53.733	Klebsiella pneumoniae	Klebsiella pneumoniae (573)	Klebsiella (570)	Enterobacteriaceae (543)	Enterobacterales (91347)	Gammaproteobacteria (1236)	Proteobacteria (1224)	Bacteria (2)	4.53719	4.99308
AP022545.1	0.0723061	0	123	100	circular	2020-10-09	Japan:Tokyo	Japan,Tokyo	34.6969	139.405		Homo sapiens		IncX1_1, EU370913,		27490	50.0909	Escherichia coli	Escherichia coli (562)	Escherichia (561)	Enterobacteriaceae (543)	Enterobacterales (91347)	Gammaproteobacteria (1236)	Proteobacteria (1224)	Bacteria (2)	4.72401	4.79929
NZ_CP035774.1	0.0723061	0	123	101	circular	2019-02-19	China: Wenzhou	China,Wenzhou	28.0153	120.656		rabbit	stool specimens	IncX1_1, EU370913,		27056	50.0776	Klebsiella pneumoniae	Klebsiella pneumoniae (573)	Klebsiella (570)	Enterobacteriaceae (543)	Enterobacterales (91347)	Gammaproteobacteria (1236)	Proteobacteria (1224)	Bacteria (2)	4.76587	4.76828
NZ_CP044159.1	0.0723061	0	123	102	circular	2019-10-07	missing				missing	missing		IncN_1, AY046276, |ColRNAI_1, DQ298019,	IncN MLST(5):repN(2);traJ(3);korA(2)	59694	52.4961	Shigella flexneri	Shigella flexneri (623)	Shigella (620)	Enterobacteriaceae (543)	Enterobacterales (91347)	Gammaproteobacteria (1236)	Proteobacteria (1224)	Bacteria (2)	3.45971	5.21963
NZ_CP058961.1	0.0726524	0	122	103	circular	2020-07-19	China:Fujian		23.34	116.54	sewage			IncFIA(HI1)_1, AF250878, |IncQ1_1, M28829, |IncFII(K)_1, CP000648,	IncF RST(K2:A21:B-):FIA(21);FIB(-);FIC(-);FII(-);FIIK(2);FIIS(-);FIIY(-)	108036	53.4683	Klebsiella pneumoniae	Klebsiella pneumoniae (573)	Klebsiella (570)	Enterobacteriaceae (543)	Enterobacterales (91347)	Gammaproteobacteria (1236)	Proteobacteria (1224)	Bacteria (2)	6.35187	6.74569
NZ_KJ440075.1	0.0726524	0	122	104	circular	2020-06-03								IncN_1, AY046276,	IncN MLST(5):repN(2);traJ(3);korA(2)	56072	52.3827	Klebsiella pneumoniae	Klebsiella pneumoniae (573)	Klebsiella (570)	Enterobacteriaceae (543)	Enterobacterales (91347)	Gammaproteobacteria (1236)	Proteobacteria (1224)	Bacteria (2)	3.4409	5.25089
NZ_KJ440076.1	0.0726524	0	122	105	circular	2020-06-03								IncN_1, AY046276,	IncN MLST(5):repN(2);traJ(3);korA(2)	56489	52.4509	Escherichia coli	Escherichia coli (562)	Escherichia (561)	Enterobacteriaceae (543)	Enterobacterales (91347)	Gammaproteobacteria (1236)	Proteobacteria (1224)	Bacteria (2)	3.44366	5.24688
NZ_CP050364.1	0.0730018	0	121	106	linear	2020-04-01	Czech Republic: Prague		50.08	14.36	Rectal swab	Homo sapiens		IncR_1, DQ449578,		119981	52.9601	Klebsiella pneumoniae	Klebsiella pneumoniae (573)	Klebsiella (570)	Enterobacteriaceae (543)	Enterobacterales (91347)	Gammaproteobacteria (1236)	Proteobacteria (1224)	Bacteria (2)	4.48978	5.21405
NZ_MT108210.1	0.0733545	0	120	107	circular	2020-08-04								IncFII(K)_1, CP000648,	IncF RST(K2:A-:B-):FIA(-);FIB(-);FIC(-);FII(-);FIIK(2);FIIS(-);FIIY(-)	119434	52.7295	Klebsiella pneumoniae	Klebsiella pneumoniae (573)	Klebsiella (570)	Enterobacteriaceae (543)	Enterobacterales (91347)	Gammaproteobacteria (1236)	Proteobacteria (1224)	Bacteria (2)	6.20329	6.68403
NZ_CP032227.1	0.0740698	0	118	108	circular	2018-09-19	missing				missing	missing		IncR_1, DQ449578,		49701	53.013	Klebsiella pneumoniae	Klebsiella pneumoniae (573)	Klebsiella (570)	Enterobacteriaceae (543)	Enterobacterales (91347)	Gammaproteobacteria (1236)	Proteobacteria (1224)	Bacteria (2)	4.53057	5.08
NZ_CP059314.1	0.0740698	0	118	109	circular	2020-08-03	not applicable				not applicable	Homo sapiens		IncR_1, DQ449578,		49681	53.0263	Klebsiella pneumoniae	Klebsiella pneumoniae (573)	Klebsiella (570)	Enterobacteriaceae (543)	Enterobacterales (91347)	Gammaproteobacteria (1236)	Proteobacteria (1224)	Bacteria (2)	4.49224	5.04524
NZ_MT415057.1	0.0740698	0	118	110	circular	2020-08-04								IncR_1, DQ449578, |IncFIA(HI1)_1, AF250878,	IncF RST(F-:A13:B-):FIA(13);FIB(-);FIC(-);FII(-);FIIK(-);FIIS(-);FIIY(-)	74030	52.5409	Klebsiella pneumoniae	Klebsiella pneumoniae (573)	Klebsiella (570)	Enterobacteriaceae (543)	Enterobacterales (91347)	Gammaproteobacteria (1236)	Proteobacteria (1224)	Bacteria (2)	4.47151	5.52964
CP052352.1	0.0744324	0	117	111	circular	2020-05-04	South Korea: Chungbuk		36.8	127.7	blood	Homo sapiens		IncFIB(pKPHS1)_1, CP003223,	IncF RST(F-:A-:B-):FIA(-);FIB(-);FIC(-);FII(-);FIIK(-);FIIS(-);FIIY(-)	162317	49.7828	Klebsiella pneumoniae	Klebsiella pneumoniae (573)	Klebsiella (570)	Enterobacteriaceae (543)	Enterobacterales (91347)	Gammaproteobacteria (1236)	Proteobacteria (1224)	Bacteria (2)	16.5235	10.9625
NZ_AP018830.1	0.0747985	0	116	112	circular	2020-04-18	Myanmar:Yangon		16.7788	96.149		Homo sapiens		IncR_1, DQ449578, |IncQ1_1, M28829, |IncFII(K)_1, CP000648,	IncF RST(K2:A-:B-):FIA(-);FIB(-);FIC(-);FII(-);FIIK(2);FIIS(-);FIIY(-)	209679	53.1603	Enterobacter hormaechei subsp. xiangfangensis	Enterobacter hormaechei (158836)	Enterobacter (547)	Enterobacteriaceae (543)	Enterobacterales (91347)	Gammaproteobacteria (1236)	Proteobacteria (1224)	Bacteria (2)	6.31306	6.77594
NZ_CP028588.1	0.0747985	0	116	113	circular	2018-04-05	China: Sichuan, Chengdu	China,Sichuan,Chengdu	30.6766	104.061		Homo sapiens	Culture	IncFIA(HI1)_1, AF250878,	IncF RST(F-:A13:B-):FIA(13);FIB(-);FIC(-);FII(-);FIIK(-);FIIS(-);FIIY(-)	42856	50.9567	Escherichia coli	Escherichia coli (562)	Escherichia (561)	Enterobacteriaceae (543)	Enterobacterales (91347)	Gammaproteobacteria (1236)	Proteobacteria (1224)	Bacteria (2)	4.46789	5.5771
NZ_CP062793.1	0.0747985	0	116	114	circular	2020-10-13	Colombia: Bogota		4.696	-74.035	Percutaneous abscess drainage	Homo sapiens		IncN_1, AY046276,	IncN MLST(-):repN(2);traJ(-);korA(-)	116956	52.7301	Klebsiella pneumoniae	Klebsiella pneumoniae (573)	Klebsiella (570)	Enterobacteriaceae (543)	Enterobacterales (91347)	Gammaproteobacteria (1236)	Proteobacteria (1224)	Bacteria (2)	6.05546	6.59631
NC_021180.1	0.0751681	0	115	115	circular	2013-05-06								IncFII(K)_1, CP000648,	IncF RST(K5:A-:B-):FIA(-);FIB(-);FIC(-);FII(-);FIIK(5);FIIS(-);FIIY(-)	49441	48.8137	Klebsiella pneumoniae	Klebsiella pneumoniae (573)	Klebsiella (570)	Enterobacteriaceae (543)	Enterobacterales (91347)	Gammaproteobacteria (1236)	Proteobacteria (1224)	Bacteria (2)	4.66034	4.6357
NZ_CP050041.1	0.0751681	0	115	116	circular	2020-08-11	China:Sichuan	China,Sichuan	30.5	102.5		broiler chicken	cell culture	IncFIB(K)_1, JN233704, |IncFIA(HI1)_1, AF250878, |IncX1_1, EU370913,	IncF RST(F-:A18:B-):FIA(18);FIB(-);FIC(-);FII(-);FIIK(-);FIIS(-);FIIY(-)	89748	51.0674	Escherichia coli	Escherichia coli (562)	Escherichia (561)	Enterobacteriaceae (543)	Enterobacterales (91347)	Gammaproteobacteria (1236)	Proteobacteria (1224)	Bacteria (2)	4.9028	5.05445
NZ_KU665641.1	0.0751681	0	115	117	circular	2020-06-03								IncR_1, DQ449578,		53618	53.0214	Klebsiella pneumoniae	Klebsiella pneumoniae (573)	Klebsiella (570)	Enterobacteriaceae (543)	Enterobacterales (91347)	Gammaproteobacteria (1236)	Proteobacteria (1224)	Bacteria (2)	4.51679	5.11384
NZ_CP035209.1	0.0755413	0	114	118	circular	2019-10-31	Thailand		13.7367	100.523	stool	Homo sapiens		IncR_1, DQ449578,		73414	53.6451	Klebsiella quasipneumoniae	Klebsiella quasipneumoniae (1463165)	Klebsiella (570)	Enterobacteriaceae (543)	Enterobacterales (91347)	Gammaproteobacteria (1236)	Proteobacteria (1224)	Bacteria (2)	4.60811	5.05895
CP052391.1	0.0755413	0	114	119	circular	2020-05-04	South Korea: Gangwon		37.82	128.16	blood	Homo sapiens				63291	52.9712	Klebsiella pneumoniae	Klebsiella pneumoniae (573)	Klebsiella (570)	Enterobacteriaceae (543)	Enterobacterales (91347)	Gammaproteobacteria (1236)	Proteobacteria (1224)	Bacteria (2)	5.94785	6.47876
NZ_MN657243.1	0.0755413	0	114	120	circular	2020-08-31								IncC_1, JN157804, |IncFIA(HI1)_1, AF250878, |IncR_1, DQ449578,	IncF RST(F-:A13:B-):FIA(13);FIB(-);FIC(-);FII(-);FIIK(-);FIIS(-);FIIY(-)	147541	52.2058	Enterobacteriaceae bacterium	Enterobacteriaceae bacterium (1849603)		Enterobacteriaceae (543)	Enterobacterales (91347)	Gammaproteobacteria (1236)	Proteobacteria (1224)	Bacteria (2)	1.77755	10.2922
NZ_CP016925.1	0.0755413	0	114	121	circular	2016-08-26	USA: Minnesota	USA,Minnesota	45.9897	-94.6113	tracheal aspirate	Homo sapiens				63291	52.9696	Klebsiella pneumoniae	Klebsiella pneumoniae (573)	Klebsiella (570)	Enterobacteriaceae (543)	Enterobacterales (91347)	Gammaproteobacteria (1236)	Proteobacteria (1224)	Bacteria (2)	5.86556	6.46441
NZ_CP022226.2	0.0755413	0	114	122	circular	2018-04-09	China: Sichuan, Chengdu	China,Sichuan,Chengdu	30.6766	104.061		Homo sapiens	Culture	IncFIA(HI1)_1, AF250878,	IncF RST(F-:A13:B-):FIA(13);FIB(-);FIC(-);FII(-);FIIK(-);FIIS(-);FIIY(-)	45476	51.2886	Escherichia coli	Escherichia coli (562)	Escherichia (561)	Enterobacteriaceae (543)	Enterobacterales (91347)	Gammaproteobacteria (1236)	Proteobacteria (1224)	Bacteria (2)	4.48311	5.62892
NZ_CP032878.1	0.0755413	0	114	123	circular	2018-10-10	China: Sichuan, Chengdu	China,Sichuan,Chengdu	30.6766	104.061		Homo sapiens	Culture	IncFIA(HI1)_1, AF250878,	IncF RST(F-:A13:B-):FIA(13);FIB(-);FIC(-);FII(-);FIIK(-);FIIS(-);FIIY(-)	45484	51.284	Escherichia coli	Escherichia coli (562)	Escherichia (561)	Enterobacteriaceae (543)	Enterobacterales (91347)	Gammaproteobacteria (1236)	Proteobacteria (1224)	Bacteria (2)	4.41683	5.5876
NZ_AP018743.1	0.0755413	0	114	124	circular	2020-11-04								IncN_1, AY046276,	IncN MLST(-):repN(2);traJ(3);korA(-)	40793	52.0947	Enterobacter cloacae	Enterobacter cloacae (550)	Enterobacter (547)	Enterobacteriaceae (543)	Enterobacterales (91347)	Gammaproteobacteria (1236)	Proteobacteria (1224)	Bacteria (2)	3.48563	5.19063
NZ_CP024857.1	0.0755413	0	114	125	circular	2017-11-22	missing				missing	missing		IncR_1, DQ449578,		76680	50.9885	Escherichia coli	Escherichia coli (562)	Escherichia (561)	Enterobacteriaceae (543)	Enterobacterales (91347)	Gammaproteobacteria (1236)	Proteobacteria (1224)	Bacteria (2)	4.42408	4.94862
NZ_CP027047.1	0.0755413	0	114	126	circular	2018-12-06	Greece: Athens		38.03	23.79	stool	Homo sapiens		IncR_1, DQ449578,		53495	53.19	Klebsiella pneumoniae	Klebsiella pneumoniae (573)	Klebsiella (570)	Enterobacteriaceae (543)	Enterobacterales (91347)	Gammaproteobacteria (1236)	Proteobacteria (1224)	Bacteria (2)	4.49575	5.0809
NZ_CP037964.1	0.0755413	0	114	127	circular	2019-03-15	China: Sichuan	China,Sichuan	30.5	102.5		Homo sapiens	Culture	IncR_1, DQ449578, |IncFII(K)_1, CP000648, |IncQ1_1, M28829, |IncFII(pHN7A8)_1, JN232517,	IncF RST(K-:A-:B-):FIA(-);FIB(-);FIC(-);FII(-);FIIK(2,7);FIIS(-);FIIY(-)	131811	52.8378	Klebsiella pneumoniae	Klebsiella pneumoniae (573)	Klebsiella (570)	Enterobacteriaceae (543)	Enterobacterales (91347)	Gammaproteobacteria (1236)	Proteobacteria (1224)	Bacteria (2)	6.29758	6.72735
NZ_MG870194.1	0.0759181	0	113	128	circular	2020-06-03								IncFIB(K)_1, JN233704,	IncF RST(F-:A-:B-):FIA(-);FIB(-);FIC(-);FII(-);FIIK(-);FIIS(-);FIIY(-)	111940	54.5828	Salmonella enterica subsp. enterica serovar London	Salmonella enterica (28901)	Salmonella (590)	Enterobacteriaceae (543)	Enterobacterales (91347)	Gammaproteobacteria (1236)	Proteobacteria (1224)	Bacteria (2)	4.11592	5.90495
CP056993.1	0.0759181	0	113	129	circular	2020-07-28	United Kingdom	United Kingdom	54.7024	-3.27658	Pooled pig faecal samples collected from floor of farm		culture	IncX1_1, EU370913,		44007	48.7036	Escherichia coli	Escherichia coli (562)	Escherichia (561)	Enterobacteriaceae (543)	Enterobacterales (91347)	Gammaproteobacteria (1236)	Proteobacteria (1224)	Bacteria (2)	4.72593	4.98096
CP056999.1	0.0759181	0	113	130	circular	2020-07-28	United Kingdom	United Kingdom	54.7024	-3.27658	Pooled pig faecal samples collected from floor of farm		culture	IncX1_1, EU370913,		44007	48.7036	Escherichia coli	Escherichia coli (562)	Escherichia (561)	Enterobacteriaceae (543)	Enterobacterales (91347)	Gammaproteobacteria (1236)	Proteobacteria (1224)	Bacteria (2)	4.69237	5.01387
CP057004.1	0.0759181	0	113	131	circular	2020-07-28	United Kingdom	United Kingdom	54.7024	-3.27658	Pooled pig faecal samples collected from floor of farm		culture	IncX1_1, EU370913,		44007	48.7036	Escherichia coli	Escherichia coli (562)	Escherichia (561)	Enterobacteriaceae (543)	Enterobacterales (91347)	Gammaproteobacteria (1236)	Proteobacteria (1224)	Bacteria (2)	4.68691	5.01
NC_023910.1	0.0759181	0	113	132	circular	2014-04-09								IncN_1, AY046276,	IncN MLST(5):repN(2);traJ(3);korA(2)	53416	52.0387	Escherichia coli	Escherichia coli (562)	Escherichia (561)	Enterobacteriaceae (543)	Enterobacterales (91347)	Gammaproteobacteria (1236)	Proteobacteria (1224)	Bacteria (2)	3.46534	5.24677
CP058054.1	0.0759181	0	113	133	circular	2020-08-07	United Kingdom	United Kingdom	54.7024	-3.27658	Pooled pig faecal samples collected from floor of farm		culture	IncX1_1, EU370913,		44007	48.7036	Escherichia coli	Escherichia coli (562)	Escherichia (561)	Enterobacteriaceae (543)	Enterobacterales (91347)	Gammaproteobacteria (1236)	Proteobacteria (1224)	Bacteria (2)	4.65102	5.01879
CP058048.1	0.0759181	0	113	134	circular	2020-08-07	United Kingdom	United Kingdom	54.7024	-3.27658	Pooled pig faecal samples collected from floor of farm		culture	IncX1_1, EU370913,		44007	48.7036	Escherichia coli	Escherichia coli (562)	Escherichia (561)	Enterobacteriaceae (543)	Enterobacterales (91347)	Gammaproteobacteria (1236)	Proteobacteria (1224)	Bacteria (2)	4.64881	5.03855
NZ_CP023420.1	0.0759181	0	113	135	circular	2018-09-08	Spain: Madrid	Spain,Madrid	40.4167	-3.70358	hospital	Homo sapiens	Bilis	IncN_1, AY046276,	IncN MLST(6):repN(2);traJ(4);korA(2)	64940	50.6791	Klebsiella pneumoniae	Klebsiella pneumoniae (573)	Klebsiella (570)	Enterobacteriaceae (543)	Enterobacterales (91347)	Gammaproteobacteria (1236)	Proteobacteria (1224)	Bacteria (2)	3.35178	5.29296
NZ_MG874043.1	0.0759181	0	113	136	circular	2020-07-01								IncFIB(K)_1, JN233704,	IncF RST(F-:A-:B-):FIA(-);FIB(-);FIC(-);FII(-);FIIK(-);FIIS(-);FIIY(-)	112943	54.4	Salmonella sp.	Salmonella sp. (599)	Salmonella (590)	Enterobacteriaceae (543)	Enterobacterales (91347)	Gammaproteobacteria (1236)	Proteobacteria (1224)	Bacteria (2)	4.12296	5.91322
CP058037.1	0.0759181	0	113	137	circular	2020-07-30	United Kingdom	United Kingdom	54.7024	-3.27658	Pooled pig faecal samples collected from floor of farm		culture	IncX1_1, EU370913,		44007	48.7036	Escherichia coli	Escherichia coli (562)	Escherichia (561)	Enterobacteriaceae (543)	Enterobacterales (91347)	Gammaproteobacteria (1236)	Proteobacteria (1224)	Bacteria (2)	4.65681	5.01041
CP057386.1	0.0759181	0	113	138	circular	2020-07-28	United Kingdom	United Kingdom	54.7024	-3.27658	Pooled pig faecal samples collected from floor of farm		culture	IncX1_1, EU370913,		44007	48.7036	Escherichia coli	Escherichia coli (562)	Escherichia (561)	Enterobacteriaceae (543)	Enterobacterales (91347)	Gammaproteobacteria (1236)	Proteobacteria (1224)	Bacteria (2)	4.66103	5.02326
NZ_LC155908.1	0.0762985	0	112	139	circular	2020-06-26								IncR_1, DQ449578,		38744	55.8564	Klebsiella pneumoniae	Klebsiella pneumoniae (573)	Klebsiella (570)	Enterobacteriaceae (543)	Enterobacterales (91347)	Gammaproteobacteria (1236)	Proteobacteria (1224)	Bacteria (2)	4.4426	4.98141
NZ_CP049949.1	0.0762985	0	112	140	circular	2020-07-17	Switzerland:Bern		46.948	7.4474	urine	Canis lupus familiaris		IncR_1, DQ449578,		43417	55.0107	Klebsiella pneumoniae	Klebsiella pneumoniae (573)	Klebsiella (570)	Enterobacteriaceae (543)	Enterobacterales (91347)	Gammaproteobacteria (1236)	Proteobacteria (1224)	Bacteria (2)	4.43638	4.89484
NZ_CP042589.1	0.0762985	0	112	141	circular	2019-10-07	Cuba: Matanzas	Cuba,Matanzas	23.0469	-81.5786	Healthy pig from farm	Sus scrofa domesticus	whole organism	IncX1_1, EU370913,		42683	48.5392	Escherichia coli	Escherichia coli (562)	Escherichia (561)	Enterobacteriaceae (543)	Enterobacterales (91347)	Gammaproteobacteria (1236)	Proteobacteria (1224)	Bacteria (2)	4.66583	5.01285
NC_023909.1	0.0762985	0	112	142	circular	2014-04-09								IncN_1, AY046276,	IncN MLST(5):repN(2);traJ(3);korA(2)	58228	52.2961	Escherichia coli	Escherichia coli (562)	Escherichia (561)	Enterobacteriaceae (543)	Enterobacterales (91347)	Gammaproteobacteria (1236)	Proteobacteria (1224)	Bacteria (2)	3.4371	5.26497
NZ_CP019006.1	0.0762985	0	112	143	circular	2017-03-06	Colombia: Bogota		4.71	-74.07		Homo sapiens		IncN_1, AY046276,	IncN MLST(5):repN(2);traJ(3);korA(2)	47531	51.1456	Escherichia coli	Escherichia coli (562)	Escherichia (561)	Enterobacteriaceae (543)	Enterobacterales (91347)	Gammaproteobacteria (1236)	Proteobacteria (1224)	Bacteria (2)	3.45586	5.26801
NC_020087.1	0.0762985	0	112	144	circular	2013-01-07								IncFII(K)_1, CP000648,	IncF RST(K2:A-:B-):FIA(-);FIB(-);FIC(-);FII(-);FIIK(2);FIIS(-);FIIY(-)	133191	52.4968	Klebsiella pneumoniae	Klebsiella pneumoniae (573)	Klebsiella (570)	Enterobacteriaceae (543)	Enterobacterales (91347)	Gammaproteobacteria (1236)	Proteobacteria (1224)	Bacteria (2)	6.33121	6.7824
NZ_MK878894.1	0.0766828	0	111	145	circular	2020-06-04								IncN_1, AY046276,	IncN MLST(5):repN(2);traJ(3);korA(2)	59724	51.9774	Escherichia coli	Escherichia coli (562)	Escherichia (561)	Enterobacteriaceae (543)	Enterobacterales (91347)	Gammaproteobacteria (1236)	Proteobacteria (1224)	Bacteria (2)	3.45062	5.22381
NZ_CP028717.1	0.0766828	0	111	146	circular	2018-04-25	China	China	34.4118	86.0327	Sputum sample	Homo sapiens	Sputum sample	IncFII(K)_1, CP000648, |IncQ1_1, M28829,	IncF RST(K2:A-:B-):FIA(-);FIB(-);FIC(-);FII(-);FIIK(2);FIIS(-);FIIY(-)	134869	52.6363	Klebsiella pneumoniae	Klebsiella pneumoniae (573)	Klebsiella (570)	Enterobacteriaceae (543)	Enterobacterales (91347)	Gammaproteobacteria (1236)	Proteobacteria (1224)	Bacteria (2)	6.35003	6.82795
NZ_CP024917.1	0.0766828	0	111	147	circular	2018-04-11	Thailand		18	100	rectal swab	Homo sapiens		IncFII(K)_1, CP000648,	IncF RST(K2:A-:B-):FIA(-);FIB(-);FIC(-);FII(-);FIIK(2);FIIS(-);FIIY(-)	126018	52.7004	Klebsiella pneumoniae	Klebsiella pneumoniae (573)	Klebsiella (570)	Enterobacteriaceae (543)	Enterobacterales (91347)	Gammaproteobacteria (1236)	Proteobacteria (1224)	Bacteria (2)	6.31135	6.79552
NZ_MN816373.1	0.0766828	0	111	148	circular	2020-08-04								IncX1_1, EU370913,		41404	48.3625	Escherichia coli	Escherichia coli (562)	Escherichia (561)	Enterobacteriaceae (543)	Enterobacterales (91347)	Gammaproteobacteria (1236)	Proteobacteria (1224)	Bacteria (2)	4.68186	5.01659
NZ_MK773536.1	0.0770708	0	110	149	circular	2020-06-04								IncFII(K)_1, CP000648, |IncQ1_1, M28829,	IncF RST(K2:A-:B-):FIA(-);FIB(-);FIC(-);FII(-);FIIK(2);FIIS(-);FIIY(-)	134473	52.6344	Klebsiella pneumoniae	Klebsiella pneumoniae (573)	Klebsiella (570)	Enterobacteriaceae (543)	Enterobacterales (91347)	Gammaproteobacteria (1236)	Proteobacteria (1224)	Bacteria (2)	6.32995	6.79979
NZ_CP047114.1	0.0770708	0	110	150	circular	2020-01-16	China:Sichuan	China,Sichuan	30.5	102.5		swine	single cell			138818	44.3516	Proteus mirabilis	Proteus mirabilis (584)	Proteus (583)	Morganellaceae (1903414)	Enterobacterales (91347)	Gammaproteobacteria (1236)	Proteobacteria (1224)	Bacteria (2)	2.81937	7.0325
NZ_AP018744.1	0.0770708	0	110	151	circular	2020-11-04								IncN_1, AY046276,	IncN MLST(5):repN(2);traJ(3);korA(2)	51983	51.7054	Enterobacter cloacae	Enterobacter cloacae (550)	Enterobacter (547)	Enterobacteriaceae (543)	Enterobacterales (91347)	Gammaproteobacteria (1236)	Proteobacteria (1224)	Bacteria (2)	3.46645	5.24643
NZ_CP010146.1	0.0770708	0	110	152	circular	2016-12-19	missing					dog		IncY_1, K02380,		112874	49.7014	Escherichia coli	Escherichia coli (562)	Escherichia (561)	Enterobacteriaceae (543)	Enterobacterales (91347)	Gammaproteobacteria (1236)	Proteobacteria (1224)	Bacteria (2)	-3.73892	-0.658211
NZ_KX518744.1	0.0774628	0	109	153	circular	2020-06-03								IncFIA(HI1)_1, AF250878, |IncX1_1, EU370913, |IncFIB(K)_1, JN233704,	IncF RST(F-:A-:B-):FIA(-);FIB(-);FIC(-);FII(-);FIIK(-);FIIS(-);FIIY(-)	110226	52.7843	Escherichia coli	Escherichia coli (562)	Escherichia (561)	Enterobacteriaceae (543)	Enterobacterales (91347)	Gammaproteobacteria (1236)	Proteobacteria (1224)	Bacteria (2)	4.94958	5.04321
NZ_AP018745.1	0.0774628	0	109	154	circular	2020-11-04								IncN_1, AY046276,	IncN MLST(5):repN(2);traJ(3);korA(2)	51983	51.7054	Escherichia coli	Escherichia coli (562)	Escherichia (561)	Enterobacteriaceae (543)	Enterobacterales (91347)	Gammaproteobacteria (1236)	Proteobacteria (1224)	Bacteria (2)	3.48352	5.2094
NZ_AP018746.1	0.0774628	0	109	155	circular	2020-11-04								IncN_1, AY046276,	IncN MLST(5):repN(2);traJ(3);korA(2)	51998	51.7039	Escherichia coli	Escherichia coli (562)	Escherichia (561)	Enterobacteriaceae (543)	Enterobacterales (91347)	Gammaproteobacteria (1236)	Proteobacteria (1224)	Bacteria (2)	3.48025	5.21728
LR890355.1	0.0774628	0	109	156	circular	2020-10-30	Australia: Melbourne		-37.8457	144.982	rectal swab	Homo sapiens		IncN3_1, EF219134, |IncR_1, DQ449578,	IncN MLST(-):repN(-);traJ(-);korA(-);(-);(-);(-);(-)	102016	53.2005	Klebsiella pneumoniae	Klebsiella pneumoniae (573)	Klebsiella (570)	Enterobacteriaceae (543)	Enterobacterales (91347)	Gammaproteobacteria (1236)	Proteobacteria (1224)	Bacteria (2)	17.9384	16.2767
NZ_MK630213.1	0.0778587	0	108	157	circular	2020-11-04										142092	44.322	Proteus mirabilis	Proteus mirabilis (584)	Proteus (583)	Morganellaceae (1903414)	Enterobacterales (91347)	Gammaproteobacteria (1236)	Proteobacteria (1224)	Bacteria (2)	2.82561	7.02863
CP052393.1	0.0778587	0	108	158	circular	2020-05-04	South Korea: Gangwon		37.82	128.16	blood	Homo sapiens		IncFIB(pKPHS1)_1, CP003223,	IncF RST(F-:A-:B-):FIA(-);FIB(-);FIC(-);FII(-);FIIK(-);FIIS(-);FIIY(-)	159667	49.706	Klebsiella pneumoniae	Klebsiella pneumoniae (573)	Klebsiella (570)	Enterobacteriaceae (543)	Enterobacterales (91347)	Gammaproteobacteria (1236)	Proteobacteria (1224)	Bacteria (2)	16.5043	10.9864
NZ_CP053043.1	0.0778587	0	108	159	circular	2020-05-28	China: Henan		35.12	113.37	feces	Gallus gallus				139490	44.3874	Proteus cibarius	Proteus cibarius (626774)	Proteus (583)	Morganellaceae (1903414)	Enterobacterales (91347)	Gammaproteobacteria (1236)	Proteobacteria (1224)	Bacteria (2)	2.84446	7.00927
NZ_KX236178.1	0.0778587	0	108	160	circular	2020-06-03								IncFII(K)_1, CP000648,	IncF RST(K2:A-:B-):FIA(-);FIB(-);FIC(-);FII(-);FIIK(2);FIIS(-);FIIY(-)	121348	52.8052	Klebsiella pneumoniae	Klebsiella pneumoniae (573)	Klebsiella (570)	Enterobacteriaceae (543)	Enterobacterales (91347)	Gammaproteobacteria (1236)	Proteobacteria (1224)	Bacteria (2)	6.16048	6.68134
NZ_AP018363.1	0.0782587	0	107	161	circular	2020-04-18	Japan	Japan	36.5748	139.239		missing		IncN_1, AY046276,	IncN MLST(5):repN(2);traJ(3);korA(2)	53989	51.5605	Escherichia coli	Escherichia coli (562)	Escherichia (561)	Enterobacteriaceae (543)	Enterobacterales (91347)	Gammaproteobacteria (1236)	Proteobacteria (1224)	Bacteria (2)	3.42518	5.16943
NZ_AP018362.1	0.0782587	0	107	162	circular	2020-04-18	Japan	Japan	36.5748	139.239		Homo sapiens		IncN_1, AY046276,	IncN MLST(5):repN(2);traJ(3);korA(2)	53198	51.5621	Escherichia coli	Escherichia coli (562)	Escherichia (561)	Enterobacteriaceae (543)	Enterobacterales (91347)	Gammaproteobacteria (1236)	Proteobacteria (1224)	Bacteria (2)	3.46421	5.22841
CP028389.3	0.0782587	0	107	163	circular	2018-03-30	China: Sichuan, Chengdu	China,Sichuan,Chengdu	30.6766	104.061		Homo sapiens	culture	IncQ1_1, M28829, |IncFII(K)_1, CP000648,	IncF RST(K2:A-:B-):FIA(-);FIB(-);FIC(-);FII(-);FIIK(2);FIIS(-);FIIY(-)	166034	52.2297	Klebsiella pneumoniae	Klebsiella pneumoniae (573)	Klebsiella (570)	Enterobacteriaceae (543)	Enterobacterales (91347)	Gammaproteobacteria (1236)	Proteobacteria (1224)	Bacteria (2)	6.33726	6.80182
CP052446.1	0.0782587	0	107	164	circular	2020-05-04	South Korea: Gangwon		37.82	128.16	blood	Homo sapiens		IncN_1, AY046276,	IncN MLST(5):repN(2);traJ(3);korA(2)	49279	52.219	Klebsiella pneumoniae	Klebsiella pneumoniae (573)	Klebsiella (570)	Enterobacteriaceae (543)	Enterobacterales (91347)	Gammaproteobacteria (1236)	Proteobacteria (1224)	Bacteria (2)	3.45191	5.24523
CP052359.1	0.0782587	0	107	165	circular	2020-05-04	South Korea: Chungbuk		36.8	127.7	blood	Homo sapiens		IncN_1, AY046276,	IncN MLST(5):repN(2);traJ(3);korA(2)	50990	52.9398	Klebsiella pneumoniae	Klebsiella pneumoniae (573)	Klebsiella (570)	Enterobacteriaceae (543)	Enterobacterales (91347)	Gammaproteobacteria (1236)	Proteobacteria (1224)	Bacteria (2)	3.43788	5.23167
NZ_CP053897.1	0.0786628	0	106	166	circular	2020-06-04	China:Guangdong province		21	110	intestine	duck				135614	44.6252	Providencia rettgeri	Providencia rettgeri (587)	Providencia (586)	Morganellaceae (1903414)	Enterobacterales (91347)	Gammaproteobacteria (1236)	Proteobacteria (1224)	Bacteria (2)	2.81701	7.04152
NZ_CP053899.1	0.0786628	0	106	167	circular	2020-06-04	China:Guangdong province		21	110	intestine	duck				135623	44.6289	Proteus mirabilis	Proteus mirabilis (584)	Proteus (583)	Morganellaceae (1903414)	Enterobacterales (91347)	Gammaproteobacteria (1236)	Proteobacteria (1224)	Bacteria (2)	2.82187	7.03295
CP044369.1	0.0786628	0	106	168	circular	2019-12-11	Taiwan	Taiwan	23.5983	120.835	missing	Homo sapiens		IncFII(pKP91)_1, CP000966, |IncFIA(HI1)_1, AF250878,	IncF RST(K9:A-:B-):FIA(21?);FIB(-);FIC(-);FII(-);FIIK(9);FIIS(-);FIIY(-)	151915	51.9988	Klebsiella pneumoniae	Klebsiella pneumoniae (573)	Klebsiella (570)	Enterobacteriaceae (543)	Enterobacterales (91347)	Gammaproteobacteria (1236)	Proteobacteria (1224)	Bacteria (2)	6.23524	6.74082
NZ_CP056226.1	0.0786628	0	106	169	circular	2020-08-03	United Kingdom	United Kingdom	54.7024	-3.27658	Wastewater influent sample		culture	IncFIA(HI1)_1, AF250878,	IncF RST(F-:A13:B-):FIA(13);FIB(-);FIC(-);FII(-);FIIK(-);FIIS(-);FIIY(-)	65682	50.8815	Klebsiella pneumoniae	Klebsiella pneumoniae (573)	Klebsiella (570)	Enterobacteriaceae (543)	Enterobacterales (91347)	Gammaproteobacteria (1236)	Proteobacteria (1224)	Bacteria (2)	4.4552	5.57369
NZ_MT077883.1	0.0786628	0	106	170	circular	2020-08-04								IncN_1, AY046276,	IncN MLST(-):repN(5);traJ(~5);korA(~4)	59150	52.9467	Escherichia coli	Escherichia coli (562)	Escherichia (561)	Enterobacteriaceae (543)	Enterobacterales (91347)	Gammaproteobacteria (1236)	Proteobacteria (1224)	Bacteria (2)	3.40216	5.39996
NZ_CP035204.1	0.0790711	0	105	171	circular	2019-10-31	Laos		19.52	102.1	stool	Homo sapiens		IncFII(K)_1, CP000648,	IncF RST(K5:A-:B-):FIA(-);FIB(-);FIC(-);FII(-);FIIK(5);FIIS(-);FIIY(-)	141746	51.9394	Klebsiella pneumoniae	Klebsiella pneumoniae (573)	Klebsiella (570)	Enterobacteriaceae (543)	Enterobacterales (91347)	Gammaproteobacteria (1236)	Proteobacteria (1224)	Bacteria (2)	6.30144	6.78016
NZ_KY751925.1	0.0790711	0	105	172	circular	2020-06-03								IncFII_1, AY458016,	IncF RST(F2:A-:B-):FIA(-);FIB(-);FIC(-);FII(2);FIIK(-);FIIS(-);FIIY(-)	111951	53.1786	Klebsiella pneumoniae	Klebsiella pneumoniae (573)	Klebsiella (570)	Enterobacteriaceae (543)	Enterobacterales (91347)	Gammaproteobacteria (1236)	Proteobacteria (1224)	Bacteria (2)	4.39501	4.79243
NZ_LT221037.1	0.0790711	0	105	173	circular	2017-08-30								IncN_1, AY046276,	IncN MLST(6):repN(2);traJ(4);korA(2)	60299	52.0904	Yersinia pseudotuberculosis	Yersinia pseudotuberculosis (633)	Yersinia (629)	Yersiniaceae (1903411)	Enterobacterales (91347)	Gammaproteobacteria (1236)	Proteobacteria (1224)	Bacteria (2)	3.37956	5.34715
NZ_CP015389.1	0.0790711	0	105	174	circular	2017-01-19	USA: New York	USA,New York	40.7309	-73.9872		Homo sapiens		IncN_1, AY046276,	IncN MLST(9):repN(5);traJ(6);korA(3)	53300	51.3996	Klebsiella pneumoniae	Klebsiella pneumoniae (573)	Klebsiella (570)	Enterobacteriaceae (543)	Enterobacterales (91347)	Gammaproteobacteria (1236)	Proteobacteria (1224)	Bacteria (2)	3.50581	5.52881
NZ_CP040859.1	0.0790711	0	105	175	circular	2020-03-01	USA	USA	39.7837	-100.446				IncN_1, AY046276,	IncN MLST(6):repN(2);traJ(4);korA(2)	60832	52.2554	Klebsiella pneumoniae	Klebsiella pneumoniae (573)	Klebsiella (570)	Enterobacteriaceae (543)	Enterobacterales (91347)	Gammaproteobacteria (1236)	Proteobacteria (1224)	Bacteria (2)	3.41179	5.38392
NZ_CP061834.1	0.0790711	0	105	176	circular	2020-09-29	Chile	Chile	-31.7613	-71.3188	blood	Homo sapiens		IncR_1, DQ449578,		47819	53.1128	Klebsiella pneumoniae	Klebsiella pneumoniae (573)	Klebsiella (570)	Enterobacteriaceae (543)	Enterobacterales (91347)	Gammaproteobacteria (1236)	Proteobacteria (1224)	Bacteria (2)	4.51935	4.94669
NZ_CP053728.1	0.0790711	0	105	177	circular	2020-06-02	China: Sichuan	China,Sichuan	30.5	102.5	slaughterhouse	pig	cell culture	IncFIA(HI1)_1, AF250878, |IncR_1, DQ449578, |IncN_1, AY046276, |IncX1_1, EU370913,	IncF RST(F-:A18:B-):FIA(18);FIB(-);FIC(-);FII(-);FIIK(-);FIIS(-);FIIY(-)|IncN MLST(-):repN(1);traJ(-);korA(-)	80920	50.7304	Escherichia coli	Escherichia coli (562)	Escherichia (561)	Enterobacteriaceae (543)	Enterobacterales (91347)	Gammaproteobacteria (1236)	Proteobacteria (1224)	Bacteria (2)	4.60417	5.01098
NZ_KJ958927.1	0.0790711	0	105	178	circular	2020-06-03								IncR_1, DQ449578, |IncFIA(HI1)_1, AF250878,	IncF RST(F-:A13:B-):FIA(13);FIB(-);FIC(-);FII(-);FIIK(-);FIIS(-);FIIY(-)	73581	53.8876	Klebsiella pneumoniae	Klebsiella pneumoniae (573)	Klebsiella (570)	Enterobacteriaceae (543)	Enterobacterales (91347)	Gammaproteobacteria (1236)	Proteobacteria (1224)	Bacteria (2)	4.48438	5.58312
NZ_AP019403.1	0.0794837	0	104	179	circular	2020-04-18	Japan:Osaka	Japan,Osaka	34.6938	135.501		Homo sapiens		IncN_1, AY046276,	IncN MLST(5):repN(2);traJ(3);korA(2)	50899	51.6827	Klebsiella pneumoniae	Klebsiella pneumoniae (573)	Klebsiella (570)	Enterobacteriaceae (543)	Enterobacterales (91347)	Gammaproteobacteria (1236)	Proteobacteria (1224)	Bacteria (2)	3.47945	5.2141
NZ_AP018742.1	0.0794837	0	104	180	circular	2020-11-04								IncN_1, AY046276,	IncN MLST(5):repN(2);traJ(3);korA(2)	50951	51.6967	Klebsiella pneumoniae	Klebsiella pneumoniae (573)	Klebsiella (570)	Enterobacteriaceae (543)	Enterobacterales (91347)	Gammaproteobacteria (1236)	Proteobacteria (1224)	Bacteria (2)	3.47179	5.21037
NZ_CP030335.1	0.0794837	0	104	181	circular	2018-07-12	missing				missing	missing		IncN_1, AY046276,	IncN MLST(7):repN(3);traJ(4);korA(2)	75281	52.66	Escherichia coli	Escherichia coli (562)	Escherichia (561)	Enterobacteriaceae (543)	Enterobacterales (91347)	Gammaproteobacteria (1236)	Proteobacteria (1224)	Bacteria (2)	3.50157	5.53557
NZ_AP022356.1	0.0794837	0	104	182	circular	2020-08-04	Japan:Osaka	Japan,Osaka	34.6938	135.501		Homo sapiens		IncN_1, AY046276,	IncN MLST(-):repN(~2);traJ(3);korA(2)	50764	51.6232	Escherichia coli	Escherichia coli (562)	Escherichia (561)	Enterobacteriaceae (543)	Enterobacterales (91347)	Gammaproteobacteria (1236)	Proteobacteria (1224)	Bacteria (2)	3.44838	5.25071
NZ_AP022349.1	0.0794837	0	104	183	circular	2020-08-04	Japan:Osaka	Japan,Osaka	34.6938	135.501		Homo sapiens		IncN_1, AY046276,	IncN MLST(5):repN(2);traJ(3);korA(2)	50206	51.3704	Klebsiella pneumoniae	Klebsiella pneumoniae (573)	Klebsiella (570)	Enterobacteriaceae (543)	Enterobacterales (91347)	Gammaproteobacteria (1236)	Proteobacteria (1224)	Bacteria (2)	3.46022	5.22183
NZ_CP024835.1	0.0794837	0	104	184	circular	2017-11-22	South Korea: Seoul	South Korea,Seoul	37.5667	126.978	Peritoneal fluid	Homo sapiens		IncFII(pKPX1)_1, AP012055,	IncF RST(F-:A-:B-):FIA(-);FIB(-);FIC(-);FII(-);FIIK(-);FIIS(-);FIIY(-)	112150	52.2782	Klebsiella pneumoniae	Klebsiella pneumoniae (573)	Klebsiella (570)	Enterobacteriaceae (543)	Enterobacterales (91347)	Gammaproteobacteria (1236)	Proteobacteria (1224)	Bacteria (2)	16.4776	1.96073
NZ_MK036885.1	0.0799006	0	103	185	circular	2020-06-03								IncR_1, DQ449578,		61463	53.1865	Leclercia adecarboxylata	Leclercia adecarboxylata (83655)	Leclercia (83654)	Enterobacteriaceae (543)	Enterobacterales (91347)	Gammaproteobacteria (1236)	Proteobacteria (1224)	Bacteria (2)	4.61941	5.67477
NZ_LT221038.1	0.0799006	0	103	186	circular	2017-08-30								IncN_1, AY046276,	IncN MLST(16):repN(7);traJ(4);korA(3)	76709	52.514	Yersinia pseudotuberculosis	Yersinia pseudotuberculosis (633)	Yersinia (629)	Yersiniaceae (1903411)	Enterobacterales (91347)	Gammaproteobacteria (1236)	Proteobacteria (1224)	Bacteria (2)	3.43653	5.50314
NZ_CP036368.1	0.0799006	0	103	187	circular	2019-03-06	China: Chengdu, Sichuan	China,Chengdu,Sichuan	30.6428	104.068		Homo sapiens	Pure Culture	IncN_1, AY046276,	IncN MLST(5):repN(2);traJ(3);korA(2)	59798	51.9566	Klebsiella pneumoniae	Klebsiella pneumoniae (573)	Klebsiella (570)	Enterobacteriaceae (543)	Enterobacterales (91347)	Gammaproteobacteria (1236)	Proteobacteria (1224)	Bacteria (2)	3.44029	5.31103
NZ_CP017059.1	0.0799006	0	103	188	circular	2016-09-04	Sierra Leone: Bo		7.9552	-11.741	Human urine	Homo sapiens		IncFIB(pB171)_1, AB024946,	IncF RST(F-:A-:B70):FIA(-);FIB(70);FIC(-);FII(-);FIIK(-);FIIS(-);FIIY(-)	171233	53.7099	Citrobacter freundii	Citrobacter freundii (546)	Citrobacter (544)	Enterobacteriaceae (543)	Enterobacterales (91347)	Gammaproteobacteria (1236)	Proteobacteria (1224)	Bacteria (2)	4.12633	7.38029
NZ_MG878868.1	0.080322	0	102	189	circular	2020-06-03								IncQ1_1, M28829, |IncFII(K)_1, CP000648,	IncF RST(K2:A-:B-):FIA(-);FIB(-);FIC(-);FII(-);FIIK(2);FIIS(-);FIIY(-)	134950	52.9003	Klebsiella pneumoniae	Klebsiella pneumoniae (573)	Klebsiella (570)	Enterobacteriaceae (543)	Enterobacterales (91347)	Gammaproteobacteria (1236)	Proteobacteria (1224)	Bacteria (2)	6.34488	6.82153
NZ_AP019402.1	0.080322	0	102	190	circular	2020-04-18	Japan:Osaka	Japan,Osaka	34.6938	135.501		Homo sapiens		IncN_1, AY046276,	IncN MLST(5):repN(2);traJ(3);korA(2)	50925	51.7054	Klebsiella pneumoniae	Klebsiella pneumoniae (573)	Klebsiella (570)	Enterobacteriaceae (543)	Enterobacterales (91347)	Gammaproteobacteria (1236)	Proteobacteria (1224)	Bacteria (2)	3.50267	5.17634
NZ_AP019550.1	0.080322	0	102	191	circular	2020-04-18	missing					Homo sapiens		IncN_1, AY046276,	IncN MLST(5):repN(2);traJ(3);korA(2)	51559	51.2054	Klebsiella pneumoniae	Klebsiella pneumoniae (573)	Klebsiella (570)	Enterobacteriaceae (543)	Enterobacterales (91347)	Gammaproteobacteria (1236)	Proteobacteria (1224)	Bacteria (2)	3.47954	5.20371
NZ_CP024839.1	0.080322	0	102	192	circular	2017-11-22	South Korea: Seoul	South Korea,Seoul	37.5667	126.978	Bronchial washing	Homo sapiens		IncFII(pKPX1)_1, AP012055,	IncF RST(F-:A-:B-):FIA(-);FIB(-);FIC(-);FII(-);FIIK(-);FIIS(-);FIIY(-)	130922	52.6268	Klebsiella pneumoniae	Klebsiella pneumoniae (573)	Klebsiella (570)	Enterobacteriaceae (543)	Enterobacterales (91347)	Gammaproteobacteria (1236)	Proteobacteria (1224)	Bacteria (2)	16.474	1.96038
NZ_CP036363.1	0.080322	0	102	193	circular	2019-03-01	China: Sichuan, Chengdu	China,Sichuan,Chengdu	30.6766	104.061		Homo sapiens	culture	IncN_1, AY046276,	IncN MLST(5):repN(2);traJ(3);korA(2)	54110	51.9405	Klebsiella pneumoniae	Klebsiella pneumoniae (573)	Klebsiella (570)	Enterobacteriaceae (543)	Enterobacterales (91347)	Gammaproteobacteria (1236)	Proteobacteria (1224)	Bacteria (2)	3.47195	5.26349
CP052433.1	0.080322	0	102	194	circular	2020-05-04	South Korea: Gangwon		37.82	128.16	blood	Homo sapiens		IncN_1, AY046276,	IncN MLST(7):repN(3);traJ(4);korA(2)	51930	50.543	Klebsiella pneumoniae	Klebsiella pneumoniae (573)	Klebsiella (570)	Enterobacteriaceae (543)	Enterobacterales (91347)	Gammaproteobacteria (1236)	Proteobacteria (1224)	Bacteria (2)	3.25179	5.22469
NZ_AP022376.1	0.080322	0	102	195	circular	2020-03-04	Japan:Saitama	Japan,Saitama	35.9754	139.416		Homo sapiens		IncT_1, AP004237,		84930	48.5906	Providencia rettgeri	Providencia rettgeri (587)	Providencia (586)	Morganellaceae (1903414)	Enterobacterales (91347)	Gammaproteobacteria (1236)	Proteobacteria (1224)	Bacteria (2)	4.08281	5.76308
NC_014368.1	0.080322	0	102	196	circular	2010-08-03								IncN_1, AY046276,	IncN MLST(18):repN(6);traJ(10);korA(1)	79307	53.1202	Klebsiella pneumoniae	Klebsiella pneumoniae (573)	Klebsiella (570)	Enterobacteriaceae (543)	Enterobacterales (91347)	Gammaproteobacteria (1236)	Proteobacteria (1224)	Bacteria (2)	3.45979	5.32015
NZ_CP018945.1	0.0807479	0	101	197	circular	2017-03-06	Viet Nam: Hanoi		21.02	105.83		Homo sapiens		IncN_1, AY046276,	IncN MLST(5):repN(2);traJ(3);korA(2)	55436	52.5435	Escherichia coli	Escherichia coli (562)	Escherichia (561)	Enterobacteriaceae (543)	Enterobacterales (91347)	Gammaproteobacteria (1236)	Proteobacteria (1224)	Bacteria (2)	3.43554	5.29531
AP022667.1	0.0807479	0	101	198	circular	2020-10-06	not applicable							IncFIB(K)_1, JN233704,	IncF RST(F-:A-:B-):FIA(-);FIB(-);FIC(-);FII(-);FIIK(-);FIIS(-);FIIY(-)	149316	51.9931	Kluyvera ascorbata	Kluyvera ascorbata (51288)	Kluyvera (579)	Enterobacteriaceae (543)	Enterobacterales (91347)	Gammaproteobacteria (1236)	Proteobacteria (1224)	Bacteria (2)	3.60036	5.46447
NZ_CP063946.1	0.0807479	0	101	199	circular	2020-11-10	China:Shenzhen		22.32	114.03	Manis javanica			repB_KLEB_VIR, AP006726, |IncHI1B(pNDM-MAR)_1, JN420336, |IncFII(K)_1, CP000648, |IncR_1, DQ449578,	IncHI1 MLST(-):HCM1_043(-);HCM1_064(-);HCM1_099(-);HCM1_116(-);HCM1_178ac(-);HCM1_259(-);(-)|IncF RST(K5:A-:B-):FIA(-);FIB(-);FIC(-);FII(-);FIIK(5);FIIS(-);FIIY(-)	433968	51.9898	Klebsiella pneumoniae	Klebsiella pneumoniae (573)	Klebsiella (570)	Enterobacteriaceae (543)	Enterobacterales (91347)	Gammaproteobacteria (1236)	Proteobacteria (1224)	Bacteria (2)	6.02147	7.13675
NZ_AP019404.1	0.0811785	0	100	200	circular	2020-04-18	Japan:Osaka	Japan,Osaka	34.6938	135.501		Homo sapiens		IncN_1, AY046276,	IncN MLST(5):repN(2);traJ(3);korA(2)	52715	51.5072	Klebsiella pneumoniae	Klebsiella pneumoniae (573)	Klebsiella (570)	Enterobacteriaceae (543)	Enterobacterales (91347)	Gammaproteobacteria (1236)	Proteobacteria (1224)	Bacteria (2)	3.4812	5.20722
NZ_CP051432.1	0.0811785	0	100	201	circular	2020-04-26	China:Sichuan	China,Sichuan	30.5	102.5		swine	single cell	IncX1_1, EU370913,		45814	46.9136	Escherichia sp. SCLE84	Escherichia sp. SCLE84 (2725997)	Escherichia (561)	Enterobacteriaceae (543)	Enterobacterales (91347)	Gammaproteobacteria (1236)	Proteobacteria (1224)	Bacteria (2)	5.27599	4.35151
MN543580.1	0.0811785	0	100	202	circular	2020-06-12								IncFII(K)_1, CP000648,	IncF RST(K2:A-:B-):FIA(-);FIB(-);FIC(-);FII(-);FIIK(2);FIIS(-);FIIY(-)	125936	51.9097	Klebsiella pneumoniae	Klebsiella pneumoniae (573)	Klebsiella (570)	Enterobacteriaceae (543)	Enterobacterales (91347)	Gammaproteobacteria (1236)	Proteobacteria (1224)	Bacteria (2)	6.28952	6.77271
NZ_LT994837.1	0.0816138	0	99	203	circular	2018-06-30					pus			IncR_1, DQ449578,		53733	53.7156	Klebsiella pneumoniae	Klebsiella pneumoniae (573)	Klebsiella (570)	Enterobacteriaceae (543)	Enterobacterales (91347)	Gammaproteobacteria (1236)	Proteobacteria (1224)	Bacteria (2)	4.38295	4.76676
MH430882.1	0.0816138	0	99	204	circular	2018-12-04								IncFIB(K)_1, JN233704,	IncF RST(F-:A-:B-):FIA(-);FIB(-);FIC(-);FII(-);FIIK(-);FIIS(-);FIIY(-)	111817	54.2798	Salmonella enterica subsp. enterica serovar London	Salmonella enterica (28901)	Salmonella (590)	Enterobacteriaceae (543)	Enterobacterales (91347)	Gammaproteobacteria (1236)	Proteobacteria (1224)	Bacteria (2)	4.09966	5.88697
NZ_CP033095.1	0.0816138	0	99	205	circular	2018-10-31	China: Sichuan	China,Sichuan	30.5	102.5	pig feces			IncY_1, K02380,		92168	50.7074	Escherichia coli	Escherichia coli (562)	Escherichia (561)	Enterobacteriaceae (543)	Enterobacterales (91347)	Gammaproteobacteria (1236)	Proteobacteria (1224)	Bacteria (2)	4.71991	4.98442
NZ_CP014524.1	0.0816138	0	99	206	circular	2016-03-01	Canada: Winnipeg		49.8994	-97.1392	unknown	Homo sapiens		IncN_1, AY046276,	IncN MLST(6):repN(2);traJ(4);korA(2)	49467	51.9215	Escherichia coli	Escherichia coli (562)	Escherichia (561)	Enterobacteriaceae (543)	Enterobacterales (91347)	Gammaproteobacteria (1236)	Proteobacteria (1224)	Bacteria (2)	3.3702	5.4078
NZ_CP039949.1	0.0816138	0	99	207	circular	2020-07-04	Switzerland: Bern	Switzerland,Bern	46.9483	7.45145	urine	dog		IncR_1, DQ449578,		56374	53.8919	Klebsiella pneumoniae	Klebsiella pneumoniae (573)	Klebsiella (570)	Enterobacteriaceae (543)	Enterobacterales (91347)	Gammaproteobacteria (1236)	Proteobacteria (1224)	Bacteria (2)	4.38551	4.80416
NZ_CP035387.1	0.0816138	0	99	208	circular	2019-02-01	United Kingdom		52.4514	-1.94125		Homo sapiens		IncN_1, AY046276,	IncN MLST(15):repN(7);traJ(6);korA(3)	63369	51.7493	Enterobacter hormaechei	Enterobacter hormaechei (158836)	Enterobacter (547)	Enterobacteriaceae (543)	Enterobacterales (91347)	Gammaproteobacteria (1236)	Proteobacteria (1224)	Bacteria (2)	3.48044	5.50641
NZ_CP025944.3	0.0816138	0	99	209	circular	2018-01-22	China: Sichuan, Yibin	China,Sichuan,Yibin	28.7658	104.635		Homo sapiens	Pure Culture	IncY_1, K02380, |IncR_1, DQ449578,		89313	54.8296	Escherichia coli	Escherichia coli (562)	Escherichia (561)	Enterobacteriaceae (543)	Enterobacterales (91347)	Gammaproteobacteria (1236)	Proteobacteria (1224)	Bacteria (2)	4.54826	5.12401
NZ_CP039946.1	0.0816138	0	99	210	circular	2020-07-04	Switzerland: Bern	Switzerland,Bern	46.9483	7.45145	pus	cat		IncR_1, DQ449578,		54251	53.9032	Klebsiella pneumoniae	Klebsiella pneumoniae (573)	Klebsiella (570)	Enterobacteriaceae (543)	Enterobacterales (91347)	Gammaproteobacteria (1236)	Proteobacteria (1224)	Bacteria (2)	4.37174	4.79896
NZ_MG825381.1	0.0820539	0	98	211	circular	2020-06-03								IncR_1, DQ449578, |IncX1_1, EU370913, |IncN_1, AY046276,	IncN MLST(-):repN(1);traJ(-);korA(-)	96688	52.9973	Escherichia coli	Escherichia coli (562)	Escherichia (561)	Enterobacteriaceae (543)	Enterobacterales (91347)	Gammaproteobacteria (1236)	Proteobacteria (1224)	Bacteria (2)	4.44674	4.93944
NZ_CP033251.1	0.0820539	0	98	212	circular	2018-11-01	China:Zhejiang	China,Zhejiang	29	120	stool		cell culture	p0111_1, AP010962, |IncFIB(AP001918)_1, AP001918, |IncHI1B(pNDM-CIT)_1, JX182975,	IncF RST(F-:A-:B54):FIA(-);FIB(54);FIC(-);FII(-);FIIK(-);FIIS(-);FIIY(-)|IncHI1 MLST(-):HCM1_043(-);HCM1_064(-);HCM1_099(-);HCM1_116(-);HCM1_178ac(-);HCM1_259(-);(-)	164062	49.2887	Escherichia coli	Escherichia coli (562)	Escherichia (561)	Enterobacteriaceae (543)	Enterobacterales (91347)	Gammaproteobacteria (1236)	Proteobacteria (1224)	Bacteria (2)	-3.5308	-0.439317
NZ_CP049955.1	0.0820539	0	98	213	circular	2020-07-17	Switzerland:Bern		46.948	7.4474	bile	Felis catus		IncR_1, DQ449578,		54471	53.9663	Klebsiella pneumoniae	Klebsiella pneumoniae (573)	Klebsiella (570)	Enterobacteriaceae (543)	Enterobacterales (91347)	Gammaproteobacteria (1236)	Proteobacteria (1224)	Bacteria (2)	4.34749	4.81474
LR890351.1	0.0820539	0	98	214	circular	2020-10-30								IncN3_1, EF219134,	IncN MLST(-):repN(-);traJ(-);korA(-);(-);(-);(-);(-)	59604	50.911	Escherichia coli	Escherichia coli (562)	Escherichia (561)	Enterobacteriaceae (543)	Enterobacterales (91347)	Gammaproteobacteria (1236)	Proteobacteria (1224)	Bacteria (2)	18.1042	16.3479
NZ_CP039937.1	0.0820539	0	98	215	circular	2020-07-04	Switzerland: Bern	Switzerland,Bern	46.9483	7.45145	tracheal aspirate	dog		IncR_1, DQ449578,		54473	53.968	Klebsiella pneumoniae	Klebsiella pneumoniae (573)	Klebsiella (570)	Enterobacteriaceae (543)	Enterobacterales (91347)	Gammaproteobacteria (1236)	Proteobacteria (1224)	Bacteria (2)	4.37383	4.78116
NZ_CP039958.1	0.0820539	0	98	216	circular	2020-07-04	Switzerland: Bern	Switzerland,Bern	46.9483	7.45145	Nosocomial environment	not applicable		IncR_1, DQ449578,		54469	53.9683	Klebsiella pneumoniae	Klebsiella pneumoniae (573)	Klebsiella (570)	Enterobacteriaceae (543)	Enterobacterales (91347)	Gammaproteobacteria (1236)	Proteobacteria (1224)	Bacteria (2)	4.38976	4.79785
NZ_CP039943.1	0.0820539	0	98	217	circular	2020-07-04	Switzerland: Bern	Switzerland,Bern	46.9483	7.45145	urine	dog		IncR_1, DQ449578,		54473	53.9625	Klebsiella pneumoniae	Klebsiella pneumoniae (573)	Klebsiella (570)	Enterobacteriaceae (543)	Enterobacterales (91347)	Gammaproteobacteria (1236)	Proteobacteria (1224)	Bacteria (2)	4.38981	4.81834
NZ_CP039940.1	0.0820539	0	98	218	circular	2020-07-04	Switzerland: Bern	Switzerland,Bern	46.9483	7.45145	tracheal aspirate	dog		IncR_1, DQ449578,		54444	53.9545	Klebsiella pneumoniae	Klebsiella pneumoniae (573)	Klebsiella (570)	Enterobacteriaceae (543)	Enterobacterales (91347)	Gammaproteobacteria (1236)	Proteobacteria (1224)	Bacteria (2)	4.4012	4.83317
NZ_CP039961.1	0.0820539	0	98	219	circular	2020-07-04	Switzerland: Bern	Switzerland,Bern	46.9483	7.45145	Nosocomial environment	not applicable		IncR_1, DQ449578,		54467	53.9648	Klebsiella pneumoniae	Klebsiella pneumoniae (573)	Klebsiella (570)	Enterobacteriaceae (543)	Enterobacterales (91347)	Gammaproteobacteria (1236)	Proteobacteria (1224)	Bacteria (2)	4.40075	4.80681
NZ_CP049718.1	0.0824989	0	97	220	circular	2020-07-17	Switzerland: Bern		46.948	7.4474	urine	Canis lupus familiaris		IncR_1, DQ449578,		55778	53.5695	Klebsiella pneumoniae	Klebsiella pneumoniae (573)	Klebsiella (570)	Enterobacteriaceae (543)	Enterobacterales (91347)	Gammaproteobacteria (1236)	Proteobacteria (1224)	Bacteria (2)	4.3765	4.77061
NZ_CP015991.1	0.0824989	0	97	221	circular	2016-06-21	China: hangzhou		30.2763	120.171		Homo sapiens		IncR_1, DQ449578,		76251	53.3265	Klebsiella pneumoniae	Klebsiella pneumoniae (573)	Klebsiella (570)	Enterobacteriaceae (543)	Enterobacterales (91347)	Gammaproteobacteria (1236)	Proteobacteria (1224)	Bacteria (2)	4.38858	4.79443
NZ_CP041172.1	0.0824989	0	97	222	circular	2019-07-02	China:Shanghai		31.22	121.1	human feces	not collected		IncC_1, JN157804,		153516	53.4159	Salmonella enterica subsp. enterica serovar Thompson	Salmonella enterica (28901)	Salmonella (590)	Enterobacteriaceae (543)	Enterobacterales (91347)	Gammaproteobacteria (1236)	Proteobacteria (1224)	Bacteria (2)	1.32072	9.3554
AP023456.1	0.0824989	0	97	223	circular	2020-09-24	Myanmar:Yangon		16.7788	96.149		Homo sapiens		IncFIA(HI1)_1, AF250878, |IncR_1, DQ449578,	IncF RST(F-:A13:B-):FIA(13);FIB(-);FIC(-);FII(-);FIIK(-);FIIS(-);FIIY(-)	56841	52.5659	Klebsiella pneumoniae	Klebsiella pneumoniae (573)	Klebsiella (570)	Enterobacteriaceae (543)	Enterobacterales (91347)	Gammaproteobacteria (1236)	Proteobacteria (1224)	Bacteria (2)	4.40848	5.61132
NZ_CP050832.1	0.0824989	0	97	224	circular	2020-03-25	China: Guangzhou	China,Guangzhou	23.1302	113.259	pork & cabbage dumplings		whole organism	IncC_1, JN157804,		152940	53.4308	Salmonella enterica	Salmonella enterica (28901)	Salmonella (590)	Enterobacteriaceae (543)	Enterobacterales (91347)	Gammaproteobacteria (1236)	Proteobacteria (1224)	Bacteria (2)	1.31817	9.27943
LR890345.1	0.0824989	0	97	225	circular	2020-10-30										15648	51.112	Klebsiella pneumoniae	Klebsiella pneumoniae (573)	Klebsiella (570)	Enterobacteriaceae (543)	Enterobacterales (91347)	Gammaproteobacteria (1236)	Proteobacteria (1224)	Bacteria (2)	4.30481	4.57149
NZ_CP029249.1	0.0824989	0	97	226	circular	2018-05-26	China		31.52	117.16	Foodborne disease surveillance	homo		IncC_1, JN157804,		152940	53.4301	Salmonella enterica subsp. enterica serovar Thompson	Salmonella enterica (28901)	Salmonella (590)	Enterobacteriaceae (543)	Enterobacterales (91347)	Gammaproteobacteria (1236)	Proteobacteria (1224)	Bacteria (2)	1.32589	9.24908
NZ_CP016810.1	0.0829489	0	96	227	circular	2016-08-21	USA: California	USA,California	36.7015	-118.756	urine	Homo sapiens		IncFIB(pQil)_1, JN233705, |IncFII(K)_1, CP000648, |IncFIB(K)_1, JN233704,	IncF RST(K2:A-:B-):FIA(-);FIB(-);FIC(-);FII(-);FIIK(2);FIIS(-);FIIY(-)	307743	51.7448	Klebsiella pneumoniae	Klebsiella pneumoniae (573)	Klebsiella (570)	Enterobacteriaceae (543)	Enterobacterales (91347)	Gammaproteobacteria (1236)	Proteobacteria (1224)	Bacteria (2)	5.84222	8.20059
NZ_MK079573.1	0.0829489	0	96	228	linear	2020-06-03								IncR_1, DQ449578,		42871	51.8719	Klebsiella pneumoniae	Klebsiella pneumoniae (573)	Klebsiella (570)	Enterobacteriaceae (543)	Enterobacterales (91347)	Gammaproteobacteria (1236)	Proteobacteria (1224)	Bacteria (2)	4.45447	5.05134
NZ_MH464586.1	0.0829489	0	96	229	circular	2020-06-03								IncFII(K)_1, CP000648,	IncF RST(K2:A-:B-):FIA(-);FIB(-);FIC(-);FII(-);FIIK(2);FIIS(-);FIIY(-)	142993	53.5131	Klebsiella pneumoniae	Klebsiella pneumoniae (573)	Klebsiella (570)	Enterobacteriaceae (543)	Enterobacterales (91347)	Gammaproteobacteria (1236)	Proteobacteria (1224)	Bacteria (2)	6.31094	6.7844
NZ_LT994836.1	0.0829489	0	96	230	circular	2018-06-30					urine			IncR_1, DQ449578,		62324	52.7919	Klebsiella pneumoniae	Klebsiella pneumoniae (573)	Klebsiella (570)	Enterobacteriaceae (543)	Enterobacterales (91347)	Gammaproteobacteria (1236)	Proteobacteria (1224)	Bacteria (2)	4.40694	4.80339
CP052436.1	0.0829489	0	96	231	circular	2020-05-04	South Korea: Gangwon		37.82	128.16	blood	Homo sapiens		IncFIB(pQil)_1, JN233705, |IncFII(K)_1, CP000648,	IncF RST(K2:A-:B-):FIA(-);FIB(-);FIC(-);FII(-);FIIK(2);FIIS(-);FIIY(-)	111550	51.7714	Klebsiella pneumoniae	Klebsiella pneumoniae (573)	Klebsiella (570)	Enterobacteriaceae (543)	Enterobacterales (91347)	Gammaproteobacteria (1236)	Proteobacteria (1224)	Bacteria (2)	6.1559	6.55904
NZ_CP028553.2	0.0829489	0	96	232	circular	2018-04-05	China: Meishan, Sichuan	China,Meishan,Sichuan	29.8133	103.83		Homo sapiens	Culture	IncFII(K)_1, CP000648,	IncF RST(K2:A-:B-):FIA(-);FIB(-);FIC(-);FII(-);FIIK(2);FIIS(-);FIIY(-)	117244	52.1417	Klebsiella variicola	Klebsiella variicola (244366)	Klebsiella (570)	Enterobacteriaceae (543)	Enterobacterales (91347)	Gammaproteobacteria (1236)	Proteobacteria (1224)	Bacteria (2)	6.32062	6.78586
NZ_CP028958.1	0.0829489	0	96	233	circular	2018-04-28	missing				missing	missing		IncN_1, AY046276,	IncN MLST(6):repN(2);traJ(4);korA(2)	71304	53.5524	Morganella morganii	Morganella morganii (582)	Morganella (581)	Morganellaceae (1903414)	Enterobacterales (91347)	Gammaproteobacteria (1236)	Proteobacteria (1224)	Bacteria (2)	3.40419	5.41653
NZ_AP022081.1	0.0829489	0	96	234	circular	2020-08-13	Japan:Tokyo		35.6514	139.481				IncN_1, AY046276,	IncN MLST(5):repN(2);traJ(3);korA(2)	55445	52.0047	Klebsiella pneumoniae	Klebsiella pneumoniae (573)	Klebsiella (570)	Enterobacteriaceae (543)	Enterobacterales (91347)	Gammaproteobacteria (1236)	Proteobacteria (1224)	Bacteria (2)	3.47553	5.23757
NZ_MN268581.1	0.0834041	0	95	235	circular	2020-06-04								IncR_1, DQ449578,		60195	54.4165	Klebsiella pneumoniae	Klebsiella pneumoniae (573)	Klebsiella (570)	Enterobacteriaceae (543)	Enterobacterales (91347)	Gammaproteobacteria (1236)	Proteobacteria (1224)	Bacteria (2)	4.46417	4.78782
NZ_CP060135.1	0.0834041	0	95	236	circular	2020-09-14	China:Huaian		33.61	119.02	slaughtered pig			IncFIB(K)_1, JN233704,	IncF RST(F-:A-:B-):FIA(-);FIB(-);FIC(-);FII(-);FIIK(-);FIIS(-);FIIY(-)	112916	54.9276	Salmonella enterica subsp. enterica serovar London	Salmonella enterica (28901)	Salmonella (590)	Enterobacteriaceae (543)	Enterobacterales (91347)	Gammaproteobacteria (1236)	Proteobacteria (1224)	Bacteria (2)	4.10933	5.91676
NZ_CP018699.1	0.0834041	0	95	237	circular	2016-12-20	Germany: Goettingen		51.5392	9.91156	abdominal drain fluid	Homo sapiens		IncR_1, DQ449578,		61010	51.3555	Klebsiella pneumoniae	Klebsiella pneumoniae (573)	Klebsiella (570)	Enterobacteriaceae (543)	Enterobacterales (91347)	Gammaproteobacteria (1236)	Proteobacteria (1224)	Bacteria (2)	4.58734	5.15119
NZ_CP018711.1	0.0834041	0	95	238	circular	2016-12-20	Germany: Goettingen		51.5392	9.91156	nasal swab	Homo sapiens		IncR_1, DQ449578,		61009	51.3564	Klebsiella pneumoniae	Klebsiella pneumoniae (573)	Klebsiella (570)	Enterobacteriaceae (543)	Enterobacterales (91347)	Gammaproteobacteria (1236)	Proteobacteria (1224)	Bacteria (2)	4.58935	5.16392
NZ_LT994839.1	0.0834041	0	95	239	circular	2018-06-30					blood			IncR_1, DQ449578,		59064	54.6018	Klebsiella pneumoniae	Klebsiella pneumoniae (573)	Klebsiella (570)	Enterobacteriaceae (543)	Enterobacterales (91347)	Gammaproteobacteria (1236)	Proteobacteria (1224)	Bacteria (2)	4.44282	4.80588
NZ_CP036206.1	0.0834041	0	95	240	circular	2019-02-28	China: Hangzhou		30.3	120.2	feces	Homo sapiens				19897	59.0441	Escherichia coli	Escherichia coli (562)	Escherichia (561)	Enterobacteriaceae (543)	Enterobacterales (91347)	Gammaproteobacteria (1236)	Proteobacteria (1224)	Bacteria (2)	5.07813	4.5634
NZ_CP052879.1	0.0834041	0	95	241	circular	2020-05-06	China: Chengdu	China,Chengdu	30.6766	104.061		chicken	cell culture	IncN_1, AY046276, |IncX1_1, EU370913,	IncN MLST(-):repN(4);traJ(-);korA(-)	62933	53.4346	Escherichia coli	Escherichia coli (562)	Escherichia (561)	Enterobacteriaceae (543)	Enterobacterales (91347)	Gammaproteobacteria (1236)	Proteobacteria (1224)	Bacteria (2)	4.50822	4.93618
CP042971.1	0.0834041	0	95	242	circular	2019-08-19	Egypt	Egypt	26.254	29.2675	Raw milk cheese	missing		IncR_1, DQ449578,		41491	53.2164	Escherichia coli	Escherichia coli (562)	Escherichia (561)	Enterobacteriaceae (543)	Enterobacterales (91347)	Gammaproteobacteria (1236)	Proteobacteria (1224)	Bacteria (2)	4.55679	5.03318
NZ_CP010168.1	0.0834041	0	95	243	circular	2016-12-19	missing							IncX1_1, EU370913,		48243	50.1834	Escherichia coli	Escherichia coli (562)	Escherichia (561)	Enterobacteriaceae (543)	Enterobacterales (91347)	Gammaproteobacteria (1236)	Proteobacteria (1224)	Bacteria (2)	4.51534	4.90034
NZ_CP047339.1	0.0834041	0	95	244	circular	2020-03-04	China: Sichuan province		30.41	104.11	a feces sample of chicken origin			IncN_1, AY046276, |IncX1_1, EU370913,	IncN MLST(-):repN(1?);traJ(-);korA(-)	35955	48.4661	Klebsiella pneumoniae	Klebsiella pneumoniae (573)	Klebsiella (570)	Enterobacteriaceae (543)	Enterobacterales (91347)	Gammaproteobacteria (1236)	Proteobacteria (1224)	Bacteria (2)	4.50323	5.01269
NZ_CP063430.1	0.0834041	0	95	245	circular	2020-11-17	Singapore		1.3213	103.846	rectal swab	Homo sapiens		IncFII(K)_1, CP000648,	IncF RST(K2:A-:B-):FIA(-);FIB(-);FIC(-);FII(-);FIIK(2);FIIS(-);FIIY(-)	118887	52.5339	Klebsiella pneumoniae	Klebsiella pneumoniae (573)	Klebsiella (570)	Enterobacteriaceae (543)	Enterobacterales (91347)	Gammaproteobacteria (1236)	Proteobacteria (1224)	Bacteria (2)	6.29352	6.77464
NZ_CP008791.1	0.0834041	0	95	246	circular	2015-02-17	USA	USA	39.7837	-100.446	perirectal swab		missing	IncFII(K)_1, CP000648, |IncFII(Yp)_1, CP000670,	IncF RST(--:A-:B-):FIA(-);FIB(-);FIC(-);FII(-);FIIK(21);FIIS(-);FIIY(6)	205586	53.8962	Klebsiella oxytoca KONIH1	Klebsiella oxytoca (571)	Klebsiella (570)	Enterobacteriaceae (543)	Enterobacterales (91347)	Gammaproteobacteria (1236)	Proteobacteria (1224)	Bacteria (2)	5.54588	6.41972
NZ_CP018718.1	0.0834041	0	95	247	circular	2016-12-20	Germany: Goettingen		51.5392	9.91156	abdominal drainage fluid	Homo sapiens		IncR_1, DQ449578,		61010	51.3555	Klebsiella pneumoniae	Klebsiella pneumoniae (573)	Klebsiella (570)	Enterobacteriaceae (543)	Enterobacterales (91347)	Gammaproteobacteria (1236)	Proteobacteria (1224)	Bacteria (2)	4.57532	5.17548
NZ_CP018705.1	0.0834041	0	95	248	circular	2016-12-20	Germany: Goettingen		51.5392	9.91156	abdominal drainage fluid	Homo sapiens		IncR_1, DQ449578,		61010	51.3555	Klebsiella pneumoniae	Klebsiella pneumoniae (573)	Klebsiella (570)	Enterobacteriaceae (543)	Enterobacterales (91347)	Gammaproteobacteria (1236)	Proteobacteria (1224)	Bacteria (2)	4.57532	5.14823
NZ_CP018724.1	0.0834041	0	95	249	circular	2016-12-20	Germany: Goettingen		51.5392	9.91156	anal swab	Homo sapiens		IncR_1, DQ449578,		61012	51.3571	Klebsiella pneumoniae	Klebsiella pneumoniae (573)	Klebsiella (570)	Enterobacteriaceae (543)	Enterobacterales (91347)	Gammaproteobacteria (1236)	Proteobacteria (1224)	Bacteria (2)	4.56621	5.1303
NZ_LS998787.1	0.0834041	0	95	250	circular	2019-01-29										27017	51.3973	Escherichia coli	Escherichia coli (562)	Escherichia (561)	Enterobacteriaceae (543)	Enterobacterales (91347)	Gammaproteobacteria (1236)	Proteobacteria (1224)	Bacteria (2)	3.51073	5.20077
NZ_CP017989.1	0.0834041	0	95	251	circular	2017-01-21	Germany: Goettingen		51.5392	9.91156	anal swab	Homo sapiens		IncR_1, DQ449578,		61011	51.3547	Klebsiella pneumoniae	Klebsiella pneumoniae (573)	Klebsiella (570)	Enterobacteriaceae (543)	Enterobacterales (91347)	Gammaproteobacteria (1236)	Proteobacteria (1224)	Bacteria (2)	4.57494	5.15282
NZ_KY271415.1	0.0838645	0	94	252	circular	2020-06-03								IncN_1, AY046276,	IncN MLST(15):repN(7);traJ(6);korA(3)	55680	50.8279	Klebsiella pneumoniae	Klebsiella pneumoniae (573)	Klebsiella (570)	Enterobacteriaceae (543)	Enterobacterales (91347)	Gammaproteobacteria (1236)	Proteobacteria (1224)	Bacteria (2)	3.44777	5.51417
NZ_MG860488.1	0.0838645	0	94	253	circular	2020-06-03								IncY_1, K02380, |IncFIA(HI1)_1, AF250878,	IncF RST(F-:A-:B-):FIA(~22);FIB(-);FIC(-);FII(-);FIIK(-);FIIS(-);FIIY(-)	109904	51.737	Escherichia coli	Escherichia coli (562)	Escherichia (561)	Enterobacteriaceae (543)	Enterobacterales (91347)	Gammaproteobacteria (1236)	Proteobacteria (1224)	Bacteria (2)	4.88681	5.06518
NZ_CP023981.1	0.0838645	0	94	254	circular	2018-09-02	China:Beijing		39.56	116.2	sputum	Homo sapiens		IncN_1, AY046276,	IncN MLST(-):repN(-);traJ(-);korA(2?)	49735	52.4098	Klebsiella variicola	Klebsiella variicola (244366)	Klebsiella (570)	Enterobacteriaceae (543)	Enterobacterales (91347)	Gammaproteobacteria (1236)	Proteobacteria (1224)	Bacteria (2)	3.45109	5.23021
NC_009131.1	0.0838645	0	94	255	circular	2007-03-19								IncN_1, AY046276,	IncN MLST(2):repN(1);traJ(2);korA(1)	65288	53.8905	Escherichia coli	Escherichia coli (562)	Escherichia (561)	Enterobacteriaceae (543)	Enterobacterales (91347)	Gammaproteobacteria (1236)	Proteobacteria (1224)	Bacteria (2)	3.66697	4.92336
NC_009132.1	0.0838645	0	94	256	circular	2007-03-19								IncN_1, AY046276,	IncN MLST(2):repN(1);traJ(2);korA(1)	63946	53.8095	Escherichia coli	Escherichia coli (562)	Escherichia (561)	Enterobacteriaceae (543)	Enterobacterales (91347)	Gammaproteobacteria (1236)	Proteobacteria (1224)	Bacteria (2)	3.66419	4.90202
NZ_CP018316.1	0.0838645	0	94	257	circular	2017-02-04	Germany: Goettingen		51.5392	9.9116	nose	Homo sapiens		IncR_1, DQ449578,		61012	51.3587	Klebsiella pneumoniae	Klebsiella pneumoniae (573)	Klebsiella (570)	Enterobacteriaceae (543)	Enterobacterales (91347)	Gammaproteobacteria (1236)	Proteobacteria (1224)	Bacteria (2)	4.55962	5.15172
NZ_CP018959.1	0.0838645	0	94	258	circular	2017-03-06	Ecuador: Quito		-0.18	-78.47		Homo sapiens		IncN_1, AY046276,	IncN MLST(5):repN(2);traJ(3);korA(2)	51885	51.5159	Escherichia coli	Escherichia coli (562)	Escherichia (561)	Enterobacteriaceae (543)	Enterobacterales (91347)	Gammaproteobacteria (1236)	Proteobacteria (1224)	Bacteria (2)	3.45901	5.29126
NZ_AP023428.1	0.0838645	0	94	259	circular	2020-09-25	not applicable							p0111_1, AP010962,		120829	49.5237	Escherichia coli	Escherichia coli (562)	Escherichia (561)	Enterobacteriaceae (543)	Enterobacterales (91347)	Gammaproteobacteria (1236)	Proteobacteria (1224)	Bacteria (2)	-3.52798	-0.435612
NZ_CP015502.1	0.0838645	0	94	260	circular	2016-05-17	United Arab Emirates		23.8532	54.6762	Urine sample	Homo sapiens		IncFII(pKPX1)_1, AP012055,	IncF RST(F-:A-:B-):FIA(-);FIB(-);FIC(-);FII(-);FIIK(-);FIIS(-);FIIY(-)	140874	52.1225	Klebsiella pneumoniae	Klebsiella pneumoniae (573)	Klebsiella (570)	Enterobacteriaceae (543)	Enterobacterales (91347)	Gammaproteobacteria (1236)	Proteobacteria (1224)	Bacteria (2)	16.4761	1.95856
NZ_CP050170.1	0.0838645	0	94	261	circular	2020-07-31	Hong Kong	Hong Kong	22.3506	114.185	rectal_swab	Homo sapiens		IncFII(K)_1, CP000648,	IncF RST(K2:A-:B-):FIA(-);FIB(-);FIC(-);FII(-);FIIK(2);FIIS(-);FIIY(-)	153935	53.4232	Klebsiella pneumoniae	Klebsiella pneumoniae (573)	Klebsiella (570)	Enterobacteriaceae (543)	Enterobacterales (91347)	Gammaproteobacteria (1236)	Proteobacteria (1224)	Bacteria (2)	6.2631	6.79929
NC_023314.1	0.0838645	0	94	262	circular	2014-01-14								IncR_1, DQ449578,		61228	54.4359	Klebsiella pneumoniae	Klebsiella pneumoniae (573)	Klebsiella (570)	Enterobacteriaceae (543)	Enterobacterales (91347)	Gammaproteobacteria (1236)	Proteobacteria (1224)	Bacteria (2)	4.42547	4.83605
NZ_LN824135.1	0.0838645	0	94	263	circular	2015-12-01					urine	Homo sapiens		IncFII(pKPX1)_1, AP012055,	IncF RST(F-:A-:B-):FIA(-);FIB(-);FIC(-);FII(-);FIIK(-);FIIS(-);FIIY(-)	118323	52.4606	Klebsiella pneumoniae	Klebsiella pneumoniae (573)	Klebsiella (570)	Enterobacteriaceae (543)	Enterobacterales (91347)	Gammaproteobacteria (1236)	Proteobacteria (1224)	Bacteria (2)	16.4735	1.96026
NZ_CP033394.1	0.0838645	0	94	264	circular	2018-10-30	China: Chengdu, Sichuan	China,Chengdu,Sichuan	30.6428	104.068		Homo sapiens	Pure Culture	IncN_1, AY046276, |IncFII(pHN7A8)_1, JN232517,	IncN MLST(5):repN(2);traJ(3);korA(2)|IncF RST(F33:A-:B-):FIA(-);FIB(-);FIC(5?);FII(33);FIIK(-);FIIS(-);FIIY(-)	142207	53.2076	Klebsiella pneumoniae	Klebsiella pneumoniae (573)	Klebsiella (570)	Enterobacteriaceae (543)	Enterobacterales (91347)	Gammaproteobacteria (1236)	Proteobacteria (1224)	Bacteria (2)	5.70662	2.9105
NZ_LT994834.1	0.0843302	0	93	265	circular	2018-06-30					urine			IncR_1, DQ449578,		49311	54.1137	Klebsiella pneumoniae	Klebsiella pneumoniae (573)	Klebsiella (570)	Enterobacteriaceae (543)	Enterobacterales (91347)	Gammaproteobacteria (1236)	Proteobacteria (1224)	Bacteria (2)	4.31279	4.77502
NC_022374.1	0.0843302	0	93	266	circular	2013-09-23								IncN_1, AY046276,	IncN MLST(5):repN(2);traJ(3);korA(2)	54373	51.5955	Escherichia coli	Escherichia coli (562)	Escherichia (561)	Enterobacteriaceae (543)	Enterobacterales (91347)	Gammaproteobacteria (1236)	Proteobacteria (1224)	Bacteria (2)	3.46053	5.224
NZ_CP032169.1	0.0843302	0	93	267	circular	2018-09-19	missing				missing	missing		IncFIB(K)_1, JN233704, |IncFIA(HI1)_1, AF250878,	IncF RST(F-:A13:B-):FIA(13);FIB(-);FIC(-);FII(-);FIIK(-);FIIS(-);FIIY(-)	171589	52.1187	Klebsiella pneumoniae	Klebsiella pneumoniae (573)	Klebsiella (570)	Enterobacteriaceae (543)	Enterobacterales (91347)	Gammaproteobacteria (1236)	Proteobacteria (1224)	Bacteria (2)	5.71438	7.15604
NZ_CP018691.1	0.0843302	0	93	268	circular	2016-12-20	Germany: Goettingen		51.5392	9.91156	tracheal secretion	Homo sapiens		IncR_1, DQ449578,		61007	51.3564	Klebsiella pneumoniae	Klebsiella pneumoniae (573)	Klebsiella (570)	Enterobacteriaceae (543)	Enterobacterales (91347)	Gammaproteobacteria (1236)	Proteobacteria (1224)	Bacteria (2)	4.54268	5.11395
NZ_CP061055.1	0.0843302	0	93	269	circular	2020-09-10	Germany		53.4608	9.9836	rectal swab	Homo sapiens		IncR_1, DQ449578,		70762	51.645	Klebsiella pneumoniae	Klebsiella pneumoniae (573)	Klebsiella (570)	Enterobacteriaceae (543)	Enterobacterales (91347)	Gammaproteobacteria (1236)	Proteobacteria (1224)	Bacteria (2)	4.63129	5.19966
NZ_CP031568.1	0.0843302	0	93	270	circular	2019-02-09	Missing				Rectal swab	Homo sapiens				132677	50.1014	Enterobacter hormaechei	Enterobacter hormaechei (158836)	Enterobacter (547)	Enterobacteriaceae (543)	Enterobacterales (91347)	Gammaproteobacteria (1236)	Proteobacteria (1224)	Bacteria (2)	-2.26208	12.1162
NZ_KY940546.1	0.0843302	0	93	271	circular	2020-07-31								IncFII(Yp)_1, CP000670,	IncF RST(Y6:A-:B-):FIA(-);FIB(-);FIC(-);FII(-);FIIK(28?);FIIS(-);FIIY(6)	88127	53.7531	Klebsiella pneumoniae	Klebsiella pneumoniae (573)	Klebsiella (570)	Enterobacteriaceae (543)	Enterobacterales (91347)	Gammaproteobacteria (1236)	Proteobacteria (1224)	Bacteria (2)	5.46383	6.40956
NZ_CP010378.1	0.0843302	0	93	272	circular	2015-01-21	USA	USA	39.7837	-100.446	bodily fluid	Homo sapiens		IncN3_1, EF219134,	IncN MLST(-):repN(-);traJ(-);korA(-);(-);(-);(-);(-)	59134	52.8528	Enterobacter hormaechei subsp. hormaechei	Enterobacter hormaechei (158836)	Enterobacter (547)	Enterobacteriaceae (543)	Enterobacterales (91347)	Gammaproteobacteria (1236)	Proteobacteria (1224)	Bacteria (2)	3.30935	6.34577
NZ_CP042548.1	0.0848014	0	92	273	circular	2019-10-13	Australia: Sydney	Australia,Sydney	-33.8548	151.216	clinical sample	Homo sapiens	Whole organism	IncN3_1, EF219134,	IncN MLST(-):repN(-);traJ(-);korA(-);(-);(-);(-);(-)	59124	50.8305	Klebsiella michiganensis	Klebsiella michiganensis (1134687)	Klebsiella (570)	Enterobacteriaceae (543)	Enterobacterales (91347)	Gammaproteobacteria (1236)	Proteobacteria (1224)	Bacteria (2)	3.30694	6.34798
NZ_CP049952.1	0.0848014	0	92	274	circular	2020-07-17	Switzerland:Bern		46.948	7.4474	urine	Felis catus		IncR_1, DQ449578,		37432	54.969	Klebsiella pneumoniae	Klebsiella pneumoniae (573)	Klebsiella (570)	Enterobacteriaceae (543)	Enterobacterales (91347)	Gammaproteobacteria (1236)	Proteobacteria (1224)	Bacteria (2)	4.38749	4.90584
CP014299.1	0.0848014	0	92	275	circular	2017-03-02	Not collected				Not collected	Homo sapiens		IncR_1, DQ449578,		39287	54.6262	Klebsiella pneumoniae	Klebsiella pneumoniae (573)	Klebsiella (570)	Enterobacteriaceae (543)	Enterobacterales (91347)	Gammaproteobacteria (1236)	Proteobacteria (1224)	Bacteria (2)	4.41691	4.94016
NZ_MT415058.1	0.0848014	0	92	276	circular	2020-08-04								IncR_1, DQ449578,		47286	52.2586	Klebsiella pneumoniae	Klebsiella pneumoniae (573)	Klebsiella (570)	Enterobacteriaceae (543)	Enterobacterales (91347)	Gammaproteobacteria (1236)	Proteobacteria (1224)	Bacteria (2)	4.45272	5.53521
NZ_CP047128.1	0.0848014	0	92	277	circular	2020-01-15	not collected					not applicable		IncC_1, JN157804, |IncN_1, AY046276,	IncN MLST(-):repN(1);traJ(-);korA(-)	85943	51.2258	Escherichia coli K-12	Escherichia coli (562)	Escherichia (561)	Enterobacteriaceae (543)	Enterobacterales (91347)	Gammaproteobacteria (1236)	Proteobacteria (1224)	Bacteria (2)	1.52826	9.48056
NZ_EF219134.1	0.0848014	0	92	278	linear	2020-06-03								IncN3_1, EF219134,	IncN MLST(-):repN(-);traJ(-);korA(-);(-);(-);(-);(-)	58107	51.0369	Klebsiella pneumoniae	Klebsiella pneumoniae (573)	Klebsiella (570)	Enterobacteriaceae (543)	Enterobacterales (91347)	Gammaproteobacteria (1236)	Proteobacteria (1224)	Bacteria (2)	3.31331	6.34703
NZ_CP045839.1	0.0852783	0	91	279	circular	2019-11-14	China:Guangzhou		23.2	113.3	flower shop	flower		IncR_1, DQ449578, |IncX1_1, EU370913, |IncN_1, AY046276,	IncN MLST(-):repN(1);traJ(-);korA(-)	84545	50.191	Citrobacter sp. H12-3-2	Citrobacter sp. H12-3-2 (2664853)	Citrobacter (544)	Enterobacteriaceae (543)	Enterobacterales (91347)	Gammaproteobacteria (1236)	Proteobacteria (1224)	Bacteria (2)	4.47636	4.96497
NZ_CP035124.1	0.0852783	0	91	280	circular	2019-01-23	China: Hangzhou	China,Hangzhou	30.249	120.205	urine	Homo sapiens		IncFII(K)_1, CP000648, |IncQ1_1, M28829, |IncFII_1, AY458016, |IncFII(pSE11)_1, AP009242, |IncFIA_1, AP001918, |IncFIB(AP001918)_1, AP001918,	IncF RST(--:A-:B1):FIA(4,20);FIB(1);FIC(3?);FII(31,36);FIIK(2);FIIS(-);FIIY(-)	227349	52.32	Escherichia coli	Escherichia coli (562)	Escherichia (561)	Enterobacteriaceae (543)	Enterobacterales (91347)	Gammaproteobacteria (1236)	Proteobacteria (1224)	Bacteria (2)	6.32855	6.7788
NZ_CP021946.1	0.0852783	0	91	281	circular	2017-06-22	missing				missing	missing		IncFII(pKP91)_1, CP000966,	IncF RST(K10:A-:B-):FIA(-);FIB(-);FIC(-);FII(-);FIIK(10);FIIS(-);FIIY(-)	120345	53.5826	Klebsiella pneumoniae	Klebsiella pneumoniae (573)	Klebsiella (570)	Enterobacteriaceae (543)	Enterobacterales (91347)	Gammaproteobacteria (1236)	Proteobacteria (1224)	Bacteria (2)	6.26838	6.77561
NZ_LT985266.1	0.0852783	0	91	282	circular	2018-03-15								IncN_1, AY046276,	IncN MLST(6):repN(2);traJ(4);korA(2)	54685	51.0743	Escherichia coli	Escherichia coli (562)	Escherichia (561)	Enterobacteriaceae (543)	Enterobacterales (91347)	Gammaproteobacteria (1236)	Proteobacteria (1224)	Bacteria (2)	3.33968	5.284
NZ_CP033628.1	0.0852783	0	91	283	circular	2018-11-26	Italy: Aosta		45.7389	7.42619	rectal swab	Homo sapiens		IncR_1, DQ449578, |IncFIA(HI1)_1, AF250878, |IncFII(K)_1, CP000648,	IncF RST(K2:A13:B-):FIA(13);FIB(-);FIC(-);FII(-);FIIK(2);FIIS(-);FIIY(-)	110020	52.8522	Klebsiella pneumoniae	Klebsiella pneumoniae (573)	Klebsiella (570)	Enterobacteriaceae (543)	Enterobacterales (91347)	Gammaproteobacteria (1236)	Proteobacteria (1224)	Bacteria (2)	6.11195	6.14713
NZ_KJ187752.1	0.0852783	0	91	284	circular	2020-06-03								IncC_1, JN157804, |IncFIA(HI1)_1, AF250878, |IncR_1, DQ449578,	IncF RST(F-:A13:B-):FIA(13);FIB(-);FIC(-);FII(-);FIIK(-);FIIS(-);FIIY(-)	133650	51.7067	Klebsiella pneumoniae	Klebsiella pneumoniae (573)	Klebsiella (570)	Enterobacteriaceae (543)	Enterobacterales (91347)	Gammaproteobacteria (1236)	Proteobacteria (1224)	Bacteria (2)	1.79532	10.2365
NZ_CP050046.1	0.0857608	0	90	285	circular	2020-08-11	China:Sichuan	China,Sichuan	30.5	102.5		broiler chicken	cell culture	IncX1_1, EU370913,		44690	50.8861	Escherichia coli	Escherichia coli (562)	Escherichia (561)	Enterobacteriaceae (543)	Enterobacterales (91347)	Gammaproteobacteria (1236)	Proteobacteria (1224)	Bacteria (2)	4.79526	4.97217
NZ_MK033501.1	0.0857608	0	90	286	circular	2020-06-03										83425	52.3224	Salmonella enterica subsp. enterica serovar Anatum	Salmonella enterica (28901)	Salmonella (590)	Enterobacteriaceae (543)	Enterobacterales (91347)	Gammaproteobacteria (1236)	Proteobacteria (1224)	Bacteria (2)	2.64901	4.56905
NZ_AP018741.1	0.0857608	0	90	287	circular	2020-11-04								IncN_1, AY046276, |IncR_1, DQ449578,	IncN MLST(-):repN(2);traJ(3);korA(2,2)	130480	52.1712	Klebsiella pneumoniae	Klebsiella pneumoniae (573)	Klebsiella (570)	Enterobacteriaceae (543)	Enterobacterales (91347)	Gammaproteobacteria (1236)	Proteobacteria (1224)	Bacteria (2)	3.5194	5.21101
NZ_CP050037.1	0.0857608	0	90	288	circular	2020-08-11	China:Sichuan	China,Sichuan	30.5	102.5		broiler chicken	cell culture	IncX1_1, EU370913,		44691	50.8805	Escherichia coli	Escherichia coli (562)	Escherichia (561)	Enterobacteriaceae (543)	Enterobacterales (91347)	Gammaproteobacteria (1236)	Proteobacteria (1224)	Bacteria (2)	4.77316	4.92421
CP028582.2	0.0857608	0	90	289	circular	2018-04-05	China: Sichuan, Chengdu	China,Sichuan,Chengdu	30.6766	104.061		Homo sapiens	Culture	IncR_1, DQ449578, |IncFII(pHN7A8)_1, JN232517,	IncF RST(F33:A-:B-):FIA(-);FIB(-);FIC(5?);FII(33);FIIK(-);FIIS(-);FIIY(-)	149258	53.5475	Klebsiella pneumoniae	Klebsiella pneumoniae (573)	Klebsiella (570)	Enterobacteriaceae (543)	Enterobacterales (91347)	Gammaproteobacteria (1236)	Proteobacteria (1224)	Bacteria (2)	5.74419	2.86156
CP052281.1	0.0857608	0	90	290	circular	2020-05-04	South Korea: Jeonnam		34.87	126.99	blood	Homo sapiens		IncFIB(pKPHS1)_1, CP003223,	IncF RST(F-:A-:B-):FIA(-);FIB(-);FIC(-);FII(-);FIIK(-);FIIS(-);FIIY(-)	144340	49.9446	Klebsiella pneumoniae	Klebsiella pneumoniae (573)	Klebsiella (570)	Enterobacteriaceae (543)	Enterobacterales (91347)	Gammaproteobacteria (1236)	Proteobacteria (1224)	Bacteria (2)	16.5238	10.964
NC_015599.1	0.0857608	0	90	291	circular	2011-05-25								IncN_1, AY046276,	IncN MLST(5):repN(2);traJ(3);korA(2)	54205	51.1244	Escherichia coli	Escherichia coli (562)	Escherichia (561)	Enterobacteriaceae (543)	Enterobacterales (91347)	Gammaproteobacteria (1236)	Proteobacteria (1224)	Bacteria (2)	3.5012	5.2779
NZ_CP020531.1	0.0857608	0	90	292	circular	2019-08-25	USA:Boston	USA,Boston	42.3603	-71.0583	blood	Homo sapiens		IncFIA(HI1)_1, AF250878, |IncR_1, DQ449578,	IncF RST(F-:A13:B-):FIA(13);FIB(-);FIC(-);FII(-);FIIK(-);FIIS(-);FIIY(-)	47801	54.4654	Enterobacter cloacae	Enterobacter cloacae (550)	Enterobacter (547)	Enterobacteriaceae (543)	Enterobacterales (91347)	Gammaproteobacteria (1236)	Proteobacteria (1224)	Bacteria (2)	4.45389	5.53525
NZ_MT415059.1	0.0857608	0	90	293	circular	2020-08-04								IncR_1, DQ449578,		69560	53.2016	Klebsiella pneumoniae	Klebsiella pneumoniae (573)	Klebsiella (570)	Enterobacteriaceae (543)	Enterobacterales (91347)	Gammaproteobacteria (1236)	Proteobacteria (1224)	Bacteria (2)	4.43726	5.56514
NZ_CP011839.1	0.0857608	0	90	294	circular	2016-10-30	Singapore		1.2951	103.783	hospital	Homo sapiens		IncR_1, DQ449578,		90103	53.5343	Klebsiella pneumoniae	Klebsiella pneumoniae (573)	Klebsiella (570)	Enterobacteriaceae (543)	Enterobacterales (91347)	Gammaproteobacteria (1236)	Proteobacteria (1224)	Bacteria (2)	4.57856	5.18145
NZ_MF344574.1	0.0862491	0	89	295	circular	2020-06-03								IncC_1, JN157804,		152215	52.7997	Enterobacter hormaechei	Enterobacter hormaechei (158836)	Enterobacter (547)	Enterobacteriaceae (543)	Enterobacterales (91347)	Gammaproteobacteria (1236)	Proteobacteria (1224)	Bacteria (2)	1.9548	9.16329
NZ_MH061195.1	0.0862491	0	89	296	circular	2020-06-03								IncC_1, JN157804,		160877	52.5066	Klebsiella pneumoniae	Klebsiella pneumoniae (573)	Klebsiella (570)	Enterobacteriaceae (543)	Enterobacterales (91347)	Gammaproteobacteria (1236)	Proteobacteria (1224)	Bacteria (2)	1.94837	9.27735
NZ_CP060133.1	0.0862491	0	89	297	circular	2020-09-14	China:Huaian		33.61	119.02	slaughtered pig			IncN_1, AY046276, |IncX1_1, EU370913, |IncFIB(K)_1, JN233704,	IncN MLST(1):repN(1);traJ(1);korA(1)|IncF RST(F-:A-:B-):FIA(-);FIB(-);FIC(-);FII(-);FIIK(-);FIIS(-);FIIY(-)	176767	53.1434	Salmonella enterica subsp. enterica serovar London	Salmonella enterica (28901)	Salmonella (590)	Enterobacteriaceae (543)	Enterobacterales (91347)	Gammaproteobacteria (1236)	Proteobacteria (1224)	Bacteria (2)	4.0612	5.84697
NZ_AP022229.1	0.0862491	0	89	298	circular	2020-08-13	Japan:Tokyo		35.6316	139.746				IncFIB(pQil)_1, JN233705, |IncN_1, AY046276,	IncF RST(F-:A-:B-):FIA(-);FIB(-);FIC(-);FII(-);FIIK(-);FIIS(-);FIIY(-)|IncN MLST(-):repN(-);traJ(3);korA(-)	98736	52.9067	Enterobacter cloacae	Enterobacter cloacae (550)	Enterobacter (547)	Enterobacteriaceae (543)	Enterobacterales (91347)	Gammaproteobacteria (1236)	Proteobacteria (1224)	Bacteria (2)	3.50928	5.21603
NZ_CP060424.1	0.0862491	0	89	299	circular	2020-06-01	India		12.9246	79.1348	blood	Homo sapiens		IncFIA(HI1)_1, AF250878,	IncF RST(F-:A13:B-):FIA(13);FIB(-);FIC(-);FII(-);FIIK(-);FIIS(-);FIIY(-)	60800	50.6974	Klebsiella pneumoniae	Klebsiella pneumoniae (573)	Klebsiella (570)	Enterobacteriaceae (543)	Enterobacterales (91347)	Gammaproteobacteria (1236)	Proteobacteria (1224)	Bacteria (2)	5.21023	6.37947
NZ_CP057318.1	0.0862491	0	89	300	circular	2020-08-04	United Kingdom	United Kingdom	54.7024	-3.27658	Pooled pig faecal samples collected from floor of farm		culture	IncN_1, AY046276,	IncN MLST(5):repN(2);traJ(3);korA(2)	44303	51.8046	Klebsiella pneumoniae	Klebsiella pneumoniae (573)	Klebsiella (570)	Enterobacteriaceae (543)	Enterobacterales (91347)	Gammaproteobacteria (1236)	Proteobacteria (1224)	Bacteria (2)	3.46701	5.21295
NC_009651.1	0.0862491	0	89	301	circular	2007-07-24								IncR_1, DQ449578,		88582	53.8168	Klebsiella pneumoniae subsp. pneumoniae MGH 78578	Klebsiella pneumoniae (573)	Klebsiella (570)	Enterobacteriaceae (543)	Enterobacterales (91347)	Gammaproteobacteria (1236)	Proteobacteria (1224)	Bacteria (2)	5.73894	3.09769
NZ_CP020523.1	0.0862491	0	89	302	circular	2019-08-25	USA:Boston	USA,Boston	42.3603	-71.0583	urine	Homo sapiens		IncFII(K)_1, CP000648,	IncF RST(K7:A-:B-):FIA(-);FIB(-);FIC(-);FII(-);FIIK(7);FIIS(-);FIIY(-)	113880	52.0056	Escherichia coli	Escherichia coli (562)	Escherichia (561)	Enterobacteriaceae (543)	Enterobacterales (91347)	Gammaproteobacteria (1236)	Proteobacteria (1224)	Bacteria (2)	6.08194	6.62485
NZ_MG252036.1	0.0862491	0	89	303	circular	2020-09-21								IncFIA(HI1)_1, AF250878, |IncR_1, DQ449578, |IncN_1, AY046276,	IncF RST(F-:A-:B-):FIA(-);FIB(-);FIC(-);FII(-);FIIK(-);FIIS(-);FIIY(-)|IncN MLST(-):repN(1);traJ(-);korA(-)	82140	52.1293	Escherichia coli	Escherichia coli (562)	Escherichia (561)	Enterobacteriaceae (543)	Enterobacterales (91347)	Gammaproteobacteria (1236)	Proteobacteria (1224)	Bacteria (2)	4.52135	4.94455
NZ_MN178639.1	0.0867434	0	88	304	circular	2020-08-04								IncN_1, AY046276,	IncN MLST(7):repN(3);traJ(4);korA(2)	54815	50.716	Kluyvera cryocrescens	Kluyvera cryocrescens (580)	Kluyvera (579)	Enterobacteriaceae (543)	Enterobacterales (91347)	Gammaproteobacteria (1236)	Proteobacteria (1224)	Bacteria (2)	3.25147	5.24254
NZ_AP022185.1	0.0867434	0	88	305	circular	2020-08-13	Japan:Tokyo		35.5619	139.753				IncFII(pKP91)_1, CP000966,	IncF RST(K12:A-:B-):FIA(-);FIB(-);FIC(-);FII(-);FIIK(12);FIIS(-);FIIY(-)	118077	52.5005	Klebsiella quasipneumoniae	Klebsiella quasipneumoniae (1463165)	Klebsiella (570)	Enterobacteriaceae (543)	Enterobacterales (91347)	Gammaproteobacteria (1236)	Proteobacteria (1224)	Bacteria (2)	6.02128	6.87231
NZ_CP050162.1	0.0867434	0	88	306	circular	2020-07-31	Hong Kong	Hong Kong	22.3506	114.185	rectal_swab	Homo sapiens		IncC_1, JN157804,		116808	51.5513	Escherichia coli	Escherichia coli (562)	Escherichia (561)	Enterobacteriaceae (543)	Enterobacterales (91347)	Gammaproteobacteria (1236)	Proteobacteria (1224)	Bacteria (2)	1.75436	10.2596
NZ_MT407546.1	0.0867434	0	88	307	circular	2020-08-04								IncX1_1, EU370913, |IncR_1, DQ449578,		116791	52.0442	Escherichia coli	Escherichia coli (562)	Escherichia (561)	Enterobacteriaceae (543)	Enterobacterales (91347)	Gammaproteobacteria (1236)	Proteobacteria (1224)	Bacteria (2)	4.46938	4.93919
NZ_CP014648.1	0.0867434	0	88	308	circular	2016-06-23	USA		38.9847	-77.0947				ColRNAI_1, DQ298019,		40448	56.2574	Klebsiella pneumoniae	Klebsiella pneumoniae (573)	Klebsiella (570)	Enterobacteriaceae (543)	Enterobacterales (91347)	Gammaproteobacteria (1236)	Proteobacteria (1224)	Bacteria (2)	5.33575	4.72321
NC_023323.1	0.0872439	0	87	309	circular	2014-01-23								IncX1_1, EU370913,		60043	52.7056	Escherichia coli ACN001	Escherichia coli (562)	Escherichia (561)	Enterobacteriaceae (543)	Enterobacterales (91347)	Gammaproteobacteria (1236)	Proteobacteria (1224)	Bacteria (2)	4.25851	4.90116
NZ_MG825383.1	0.0872439	0	87	310	circular	2020-06-03								IncFIB(K)_1, JN233704,	IncF RST(F-:A-:B-):FIA(-);FIB(-);FIC(-);FII(-);FIIK(-);FIIS(-);FIIY(-)	192477	50.9224	Escherichia coli	Escherichia coli (562)	Escherichia (561)	Enterobacteriaceae (543)	Enterobacterales (91347)	Gammaproteobacteria (1236)	Proteobacteria (1224)	Bacteria (2)	-3.50793	-0.416497
NZ_MG836696.1	0.0872439	0	87	311	circular	2020-06-03								IncFIA(HI1)_1, AF250878, |IncR_1, DQ449578,	IncF RST(F-:A-:B-):FIA(~18);FIB(-);FIC(-);FII(-);FIIK(-);FIIS(-);FIIY(-)	79030	49.4761	Escherichia coli	Escherichia coli (562)	Escherichia (561)	Enterobacteriaceae (543)	Enterobacterales (91347)	Gammaproteobacteria (1236)	Proteobacteria (1224)	Bacteria (2)	4.39994	5.2254
NZ_MK124610.1	0.0872439	0	87	312	circular	2020-06-04								IncFII(Yp)_1, CP000670, |IncFIB(pB171)_1, AB024946,	IncF RST(Y3:A-:B70):FIA(-);FIB(70);FIC(-);FII(-);FIIK(-);FIIS(-);FIIY(3)	171645	54.5183	Citrobacter werkmanii	Citrobacter werkmanii (67827)	Citrobacter (544)	Enterobacteriaceae (543)	Enterobacterales (91347)	Gammaproteobacteria (1236)	Proteobacteria (1224)	Bacteria (2)	4.12763	7.36236
NZ_CP018977.1	0.0872439	0	87	313	circular	2017-03-06	USA: Caguas		18.24	-66.04		Homo sapiens		IncN_1, AY046276,	IncN MLST(-):repN(7);traJ(6);korA(2)	58431	53.3501	Escherichia coli	Escherichia coli (562)	Escherichia (561)	Enterobacteriaceae (543)	Enterobacterales (91347)	Gammaproteobacteria (1236)	Proteobacteria (1224)	Bacteria (2)	3.4507	5.52301
NZ_CP057724.1	0.0872439	0	87	314	circular	2020-08-05	United Kingdom	United Kingdom	54.7024	-3.27658	Pooled pig faecal samples collected from floor of farm		culture	IncN_1, AY046276,	IncN MLST(5):repN(2);traJ(3);korA(2)	48464	52.2264	Klebsiella pneumoniae	Klebsiella pneumoniae (573)	Klebsiella (570)	Enterobacteriaceae (543)	Enterobacterales (91347)	Gammaproteobacteria (1236)	Proteobacteria (1224)	Bacteria (2)	3.45991	5.23748
NC_019783.1	0.0872439	0	87	315	circular	2012-12-11								Col156_1, NC_009781,		28080	57.7849	bacterium 36B	bacterium 36B (1264698)						Bacteria (2)	4.18394	4.32039
NZ_CP029586.1	0.0872439	0	87	316	circular	2018-06-02	Sweden	Sweden	59.675	14.5209		Homo sapiens	unknown	IncFIB(pQil)_1, JN233705,	IncF RST(F-:A-:B-):FIA(-);FIB(-);FIC(-);FII(-);FIIK(-);FIIS(-);FIIY(-)	96190	51.6946	Klebsiella pneumoniae	Klebsiella pneumoniae (573)	Klebsiella (570)	Enterobacteriaceae (543)	Enterobacterales (91347)	Gammaproteobacteria (1236)	Proteobacteria (1224)	Bacteria (2)	4.75272	5.35777
NZ_CP023841.1	0.0872439	0	87	317	circular	2018-12-05	Sweden	Sweden	59.675	14.5209	feces	Homo sapiens	Bacterial isolate	IncFIB(pQil)_1, JN233705,	IncF RST(F-:A-:B-):FIA(-);FIB(-);FIC(-);FII(-);FIIK(-);FIIS(-);FIIY(-)	96190	51.6946	Klebsiella pneumoniae	Klebsiella pneumoniae (573)	Klebsiella (570)	Enterobacteriaceae (543)	Enterobacterales (91347)	Gammaproteobacteria (1236)	Proteobacteria (1224)	Bacteria (2)	4.72949	5.42363
NZ_CP029688.1	0.0877506	0	86	318	circular	2018-09-08	missing				air		single strain	IncFIB(K)_1, JN233704, |p0111_1, AP010962,	IncF RST(F-:A-:B-):FIA(-);FIB(-);FIC(-);FII(-);FIIK(-);FIIS(-);FIIY(-)	151879	49.5098	Escherichia coli	Escherichia coli (562)	Escherichia (561)	Enterobacteriaceae (543)	Enterobacterales (91347)	Gammaproteobacteria (1236)	Proteobacteria (1224)	Bacteria (2)	-3.51658	-0.425835
NZ_MT230118.1	0.0877506	0	86	319	circular	2020-08-04	France	France	46.6034	1.88833	river					7278	52.006	Escherichia coli	Escherichia coli (562)	Escherichia (561)	Enterobacteriaceae (543)	Enterobacterales (91347)	Gammaproteobacteria (1236)	Proteobacteria (1224)	Bacteria (2)	4.00172	4.77966
CP064659.1	0.0877506	0	86	320	circular	2020-11-17	China: Hangzhou	China,Hangzhou	30.249	120.205	blood	Homo sapiens		IncFII(pECLA)_1, CP001919, |IncFIB(pECLA)_1, CP001919,	IncF RST(F-:A-:B-):FIA(-);FIB(-);FIC(-);FII(-);FIIK(-);FIIS(-);FIIY(-)	90483	51.3246	Enterobacter hormaechei	Enterobacter hormaechei (158836)	Enterobacter (547)	Enterobacteriaceae (543)	Enterobacterales (91347)	Gammaproteobacteria (1236)	Proteobacteria (1224)	Bacteria (2)	4.91303	7.10264
LR890644.1	0.0877506	0	86	321	circular	2020-10-30								IncFIA(HI1)_1, AF250878,	IncF RST(F-:A-:B-):FIA(~22);FIB(-);FIC(-);FII(-);FIIK(-);FIIS(-);FIIY(-)	42290	51.3431	Klebsiella pneumoniae	Klebsiella pneumoniae (573)	Klebsiella (570)	Enterobacteriaceae (543)	Enterobacterales (91347)	Gammaproteobacteria (1236)	Proteobacteria (1224)	Bacteria (2)	4.72055	5.12829
NZ_CP063941.1	0.0877506	0	86	322	circular	2020-11-10	China:Tangshan		39.36	118.11	Human fecal samples			IncR_1, DQ449578,		68142	50.6575	Klebsiella pneumoniae	Klebsiella pneumoniae (573)	Klebsiella (570)	Enterobacteriaceae (543)	Enterobacterales (91347)	Gammaproteobacteria (1236)	Proteobacteria (1224)	Bacteria (2)	4.73332	5.89338
NZ_CP053372.1	0.0877506	0	86	323	circular	2020-05-21	China: Wenzhou		27.25	120	goose faeces					177911	43.9911	Proteus cibarius	Proteus cibarius (626774)	Proteus (583)	Morganellaceae (1903414)	Enterobacterales (91347)	Gammaproteobacteria (1236)	Proteobacteria (1224)	Bacteria (2)	2.81396	7.043
CP052566.1	0.0877506	0	86	324	circular	2020-05-04	South Korea: Seoul		37.57	126.98	blood	Homo sapiens		IncR_1, DQ449578, |IncFII(K)_1, CP000648,	IncF RST(K7:A-:B-):FIA(-);FIB(-);FIC(-);FII(-);FIIK(7);FIIS(-);FIIY(-)	133205	52.1504	Klebsiella pneumoniae	Klebsiella pneumoniae (573)	Klebsiella (570)	Enterobacteriaceae (543)	Enterobacterales (91347)	Gammaproteobacteria (1236)	Proteobacteria (1224)	Bacteria (2)	6.0001	6.56632
NZ_MG878866.1	0.0882637	0	85	325	circular	2020-06-03								IncR_1, DQ449578, |IncFII_1, AY458016, |IncN_1, AY046276,	IncF RST(F2:A-:B-):FIA(-);FIB(-);FIC(-);FII(2);FIIK(-);FIIS(-);FIIY(-)|IncN MLST(5):repN(2);traJ(3);korA(2)	130755	51.8389	Escherichia coli	Escherichia coli (562)	Escherichia (561)	Enterobacteriaceae (543)	Enterobacterales (91347)	Gammaproteobacteria (1236)	Proteobacteria (1224)	Bacteria (2)	-0.231666	5.99809
NZ_MH056209.1	0.0882637	0	85	326	circular	2020-06-03								IncFIB(K)_1, JN233704,	IncF RST(F-:A-:B-):FIA(-);FIB(-);FIC(-);FII(-);FIIK(-);FIIS(-);FIIY(-)	108256	51.8096	Enterobacter cloacae	Enterobacter cloacae (550)	Enterobacter (547)	Enterobacteriaceae (543)	Enterobacterales (91347)	Gammaproteobacteria (1236)	Proteobacteria (1224)	Bacteria (2)	17.8112	16.0812
NZ_MH477636.1	0.0882637	0	85	327	circular	2020-06-03								IncR_1, DQ449578, |IncN_1, AY046276,	IncN MLST(-):repN(7);traJ(-);korA(-)	163588	53.8175	Klebsiella pneumoniae	Klebsiella pneumoniae (573)	Klebsiella (570)	Enterobacteriaceae (543)	Enterobacterales (91347)	Gammaproteobacteria (1236)	Proteobacteria (1224)	Bacteria (2)	6.35085	6.57118
NZ_AP022367.1	0.0882637	0	85	328	circular	2020-08-04	Japan:Osaka	Japan,Osaka	34.6938	135.501		Homo sapiens		IncFIB(AP001918)_1, AP001918, |IncN_1, AY046276,	IncF RST(F-:A-:B1):FIA(-);FIB(1);FIC(-);FII(-);FIIK(-);FIIS(-);FIIY(-)|IncN MLST(-):repN(~2);traJ(3);korA(2?)	83281	52.2952	Escherichia coli	Escherichia coli (562)	Escherichia (561)	Enterobacteriaceae (543)	Enterobacterales (91347)	Gammaproteobacteria (1236)	Proteobacteria (1224)	Bacteria (2)	3.57916	5.14851
NZ_CP012569.1	0.0882637	0	85	329	circular	2016-11-27	USA: California		34.0561	-118.43	Rectal	Homo sapiens		IncFII(pKPX1)_1, AP012055,	IncF RST(F-:A-:B-):FIA(-);FIB(-);FIC(-);FII(-);FIIK(-);FIIS(-);FIIY(-)	83730	53.7191	Klebsiella pneumoniae	Klebsiella pneumoniae (573)	Klebsiella (570)	Enterobacteriaceae (543)	Enterobacterales (91347)	Gammaproteobacteria (1236)	Proteobacteria (1224)	Bacteria (2)	16.4778	1.96032
NZ_CP047346.1	0.0882637	0	85	330	circular	2020-03-04	China: Nantong, jiangsu province		31.41	120.11	a nose swab sample of swine origin					121294	48.2827	Proteus vulgaris	Proteus vulgaris (585)	Proteus (583)	Morganellaceae (1903414)	Enterobacterales (91347)	Gammaproteobacteria (1236)	Proteobacteria (1224)	Bacteria (2)	2.89613	7.03521
NZ_CP040929.1	0.0882637	0	85	331	circular	2019-08-26	China:Guangdong		19.75	110	feces	cow		IncX1_1, EU370913,		57104	48.6341	Escherichia coli	Escherichia coli (562)	Escherichia (561)	Enterobacteriaceae (543)	Enterobacterales (91347)	Gammaproteobacteria (1236)	Proteobacteria (1224)	Bacteria (2)	5.30158	4.32496
NZ_CP049355.1	0.0882637	0	85	332	circular	2020-03-21	China: Henan	China,Henan	34	114		pet dog	faecal sample	IncFIB(AP001918)_1, AP001918, |IncFIC(FII)_1, AP001918,	IncF RST(--:A-:B-):FIA(-);FIB(58?);FIC(4);FII(18);FIIK(-);FIIS(-);FIIY(-)	161057	51.1893	Escherichia coli	Escherichia coli (562)	Escherichia (561)	Enterobacteriaceae (543)	Enterobacterales (91347)	Gammaproteobacteria (1236)	Proteobacteria (1224)	Bacteria (2)	-1.66159	6.31415
NZ_LS992177.1	0.0882637	0	85	333	circular	2019-01-29								IncN_1, AY046276,	IncN MLST(-):repN(2,2);traJ(3);korA(2)	71403	54.0229	Citrobacter freundii	Citrobacter freundii (546)	Citrobacter (544)	Enterobacteriaceae (543)	Enterobacterales (91347)	Gammaproteobacteria (1236)	Proteobacteria (1224)	Bacteria (2)	3.45938	5.19766
NZ_CP047288.1	0.0882637	0	85	334	circular	2020-01-16	China: zhejian province	China,zhejian province	29.1	119.36		goose	faeces			152824	43.0286	Proteus cibarius	Proteus cibarius (626774)	Proteus (583)	Morganellaceae (1903414)	Enterobacterales (91347)	Gammaproteobacteria (1236)	Proteobacteria (1224)	Bacteria (2)	2.82149	7.03669
NZ_MG288676.1	0.0887833	0	84	335	circular	2020-06-03								IncFII(K)_1, CP000648, |IncFIB(K)_1, JN233704,	IncF RST(K8:A-:B-):FIA(-);FIB(-);FIC(-);FII(-);FIIK(8);FIIS(-);FIIY(-)	164731	51.5198	Klebsiella pneumoniae	Klebsiella pneumoniae (573)	Klebsiella (570)	Enterobacteriaceae (543)	Enterobacterales (91347)	Gammaproteobacteria (1236)	Proteobacteria (1224)	Bacteria (2)	5.9717	7.77494
MH430881.1	0.0887833	0	84	336	circular	2018-12-04								IncFIB(K)_1, JN233704, |IncI1-I(Gamma)_1, AP005147,	IncF RST(F-:A-:B-):FIA(-);FIB(-);FIC(-);FII(-);FIIK(-);FIIS(-);FIIY(-)	202750	52.6737	Salmonella enterica subsp. enterica serovar London	Salmonella enterica (28901)	Salmonella (590)	Enterobacteriaceae (543)	Enterobacterales (91347)	Gammaproteobacteria (1236)	Proteobacteria (1224)	Bacteria (2)	6.95014	-3.46031
NZ_CP046273.1	0.0887833	0	84	337	circular	2019-12-09	China:guangzhou		23.13	113.28	urine sample	Homo sapiens		IncFII(pECLA)_1, CP001919, |IncFIB(pECLA)_1, CP001919,	IncF RST(F-:A-:B-):FIA(-);FIB(-);FIC(-);FII(-);FIIK(-);FIIS(-);FIIY(-)	67220	50.5251	Enterobacter hormaechei	Enterobacter hormaechei (158836)	Enterobacter (547)	Enterobacteriaceae (543)	Enterobacterales (91347)	Gammaproteobacteria (1236)	Proteobacteria (1224)	Bacteria (2)	4.98531	7.14787
NZ_KX928751.1	0.0893096	0	83	338	circular	2020-06-03								IncN_1, AY046276,	IncN MLST(7):repN(3);traJ(4);korA(2)	68482	51.0893	Klebsiella pneumoniae	Klebsiella pneumoniae (573)	Klebsiella (570)	Enterobacteriaceae (543)	Enterobacterales (91347)	Gammaproteobacteria (1236)	Proteobacteria (1224)	Bacteria (2)	3.29225	5.27946
NZ_KX928750.1	0.0893096	0	83	339	circular	2020-06-03								IncN_1, AY046276,	IncN MLST(7):repN(3);traJ(4);korA(2)	65595	51.0557	Klebsiella pneumoniae	Klebsiella pneumoniae (573)	Klebsiella (570)	Enterobacteriaceae (543)	Enterobacterales (91347)	Gammaproteobacteria (1236)	Proteobacteria (1224)	Bacteria (2)	3.31112	5.30423
NZ_CP015725.1	0.0893096	0	83	340	circular	2016-05-29	China	China	34.4118	86.0327	chicken carcass			IncHI2A_1, BX664015, |IncHI2_1, BX664015, |IncN_1, AY046276,	IncHI2 DLST(-):smr0018(3);smr0199(-)|IncN MLST(-):repN(1);traJ(-);korA(-)	210106	48.5622	Salmonella enterica	Salmonella enterica (28901)	Salmonella (590)	Enterobacteriaceae (543)	Enterobacterales (91347)	Gammaproteobacteria (1236)	Proteobacteria (1224)	Bacteria (2)	-2.86852	14.7261
NZ_MH917123.1	0.0893096	0	83	341	circular	2020-06-03								IncN_1, AY046276,	IncN MLST(7):repN(3);traJ(4);korA(2)	65604	50.9923	Klebsiella pneumoniae	Klebsiella pneumoniae (573)	Klebsiella (570)	Enterobacteriaceae (543)	Enterobacterales (91347)	Gammaproteobacteria (1236)	Proteobacteria (1224)	Bacteria (2)	3.28661	5.30038
NZ_CP016812.1	0.0893096	0	83	342	circular	2016-08-21	USA: California	USA,California	36.7015	-118.756	urine	Homo sapiens		IncR_1, DQ449578, |IncFII(K)_1, CP000648, |Col(pHAD28)_1, KU674895,	IncF RST(K2:A-:B-):FIA(-);FIB(-);FIC(-);FII(-);FIIK(2);FIIS(-);FIIY(-)	65887	54.9592	Klebsiella pneumoniae	Klebsiella pneumoniae (573)	Klebsiella (570)	Enterobacteriaceae (543)	Enterobacterales (91347)	Gammaproteobacteria (1236)	Proteobacteria (1224)	Bacteria (2)	4.45747	5.5842
NZ_CP042568.1	0.0893096	0	83	343	circular	2019-10-13	Australia: Sydney	Australia,Sydney	-33.8548	151.216	clinical sample	Homo sapiens	Whole organism	IncM2_1, AF550415,		88956	52.7991	Enterobacter hormaechei	Enterobacter hormaechei (158836)	Enterobacter (547)	Enterobacteriaceae (543)	Enterobacterales (91347)	Gammaproteobacteria (1236)	Proteobacteria (1224)	Bacteria (2)	-3.94643	8.84845
NZ_CP011646.1	0.0893096	0	83	344	circular	2015-06-18	USA:Virginia		38.14	-78.45	Perirectal	Homo sapiens		IncN3_1, EF219134,	IncN MLST(-):repN(-);traJ(-);korA(-);(-);(-);(-);(-)	96702	53.8334	Klebsiella pneumoniae	Klebsiella pneumoniae (573)	Klebsiella (570)	Enterobacteriaceae (543)	Enterobacterales (91347)	Gammaproteobacteria (1236)	Proteobacteria (1224)	Bacteria (2)	3.39649	6.29766
NZ_CP042542.1	0.0893096	0	83	345	circular	2019-10-17	Australia: Sydney	Australia,Sydney	-33.8548	151.216	clinical sample	Homo sapiens	Whole organism	IncM2_1, AF550415,		88956	52.8003	Enterobacter hormaechei	Enterobacter hormaechei (158836)	Enterobacter (547)	Enterobacteriaceae (543)	Enterobacterales (91347)	Gammaproteobacteria (1236)	Proteobacteria (1224)	Bacteria (2)	-3.95498	8.84595
NZ_CP032188.1	0.0893096	0	83	346	circular	2018-09-19	missing				missing	missing		IncFII(pKPX1)_1, AP012055,	IncF RST(F-:A-:B-):FIA(-);FIB(-);FIC(-);FII(-);FIIK(-);FIIS(-);FIIY(-)	93870	53.5464	Klebsiella pneumoniae	Klebsiella pneumoniae (573)	Klebsiella (570)	Enterobacteriaceae (543)	Enterobacterales (91347)	Gammaproteobacteria (1236)	Proteobacteria (1224)	Bacteria (2)	16.4777	1.95861
NZ_CP012564.1	0.0893096	0	83	347	circular	2016-11-27	USA: California		34.0561	-118.43	abdominal drainage	Homo sapiens		IncFII(pKPX1)_1, AP012055,	IncF RST(F-:A-:B-):FIA(-);FIB(-);FIC(-);FII(-);FIIK(-);FIIS(-);FIIY(-)	88800	53.6261	Klebsiella pneumoniae	Klebsiella pneumoniae (573)	Klebsiella (570)	Enterobacteriaceae (543)	Enterobacterales (91347)	Gammaproteobacteria (1236)	Proteobacteria (1224)	Bacteria (2)	16.4797	1.9582
NZ_CP042532.1	0.0893096	0	83	348	circular	2019-10-13	Australia: Sydney	Australia,Sydney	-33.8548	151.216	clinical sample	Homo sapiens	Whole organism	IncM2_1, AF550415,		88956	52.798	Klebsiella aerogenes	Klebsiella aerogenes (548)	Klebsiella (570)	Enterobacteriaceae (543)	Enterobacterales (91347)	Gammaproteobacteria (1236)	Proteobacteria (1224)	Bacteria (2)	-3.95754	8.84225
NC_025183.1	0.0893096	0	83	349	circular	2014-09-29								IncN_1, AY046276,	IncN MLST(7):repN(3);traJ(4);korA(2)	64935	50.76	Escherichia coli	Escherichia coli (562)	Escherichia (561)	Enterobacteriaceae (543)	Enterobacterales (91347)	Gammaproteobacteria (1236)	Proteobacteria (1224)	Bacteria (2)	3.32134	5.27589
NZ_CP047466.1	0.0893096	0	83	350	circular	2020-03-04	China: Nantong, jiangsu province		31.41	120.11	a feces sample of swine origin			IncX1_1, EU370913, |IncFIB(K)_1, JN233704,	IncF RST(F-:A-:B-):FIA(-);FIB(-);FIC(-);FII(-);FIIK(-);FIIS(-);FIIY(-)	114813	50.5701	Escherichia coli	Escherichia coli (562)	Escherichia (561)	Enterobacteriaceae (543)	Enterobacterales (91347)	Gammaproteobacteria (1236)	Proteobacteria (1224)	Bacteria (2)	4.92812	5.04644
NC_025019.1	0.0893096	0	83	351	circular	2014-09-25								IncN_1, AY046276,	IncN MLST(7):repN(3);traJ(4);korA(2)	65549	51	Klebsiella pneumoniae subsp. ozaenae	Klebsiella pneumoniae (573)	Klebsiella (570)	Enterobacteriaceae (543)	Enterobacterales (91347)	Gammaproteobacteria (1236)	Proteobacteria (1224)	Bacteria (2)	3.3327	5.28784
CP045559.1	0.0893096	0	83	352	circular	2019-11-02	China:Guang zhou		23	113	missing					20370	55.2381	Citrobacter sp. S39	Citrobacter sp. S39 (2660638)	Citrobacter (544)	Enterobacteriaceae (543)	Enterobacterales (91347)	Gammaproteobacteria (1236)	Proteobacteria (1224)	Bacteria (2)	5.11903	4.55088
NZ_CP046002.1	0.0893096	0	83	353	circular	2019-11-20	China:Henan	China,Henan	34	114	feces	swine	mixed culture	IncX1_1, EU370913,		59351	48.8214	Escherichia coli	Escherichia coli (562)	Escherichia (561)	Enterobacteriaceae (543)	Enterobacterales (91347)	Gammaproteobacteria (1236)	Proteobacteria (1224)	Bacteria (2)	5.3027	4.34355
NZ_CP032995.1	0.0898429	0	82	354	circular	2018-10-23	China: Chengdu		30.6289	104.089	Jin River water W5		cell culture	IncN_1, AY046276, |IncFIA(HI1)_1, AF250878, |IncFIB(K)_1, JN233704,	IncN MLST(-):repN(1);traJ(-);korA(-)|IncF RST(F-:A18:B-):FIA(18);FIB(-);FIC(-);FII(-);FIIK(-);FIIS(-);FIIY(-)	72717	51.5189	Escherichia coli	Escherichia coli (562)	Escherichia (561)	Enterobacteriaceae (543)	Enterobacterales (91347)	Gammaproteobacteria (1236)	Proteobacteria (1224)	Bacteria (2)	4.95372	5.10966
NZ_CP045998.1	0.0898429	0	82	355	circular	2019-11-20	China:Henan	China,Henan	34	114	feces	swine	mixed culture	IncX1_1, EU370913,		59353	48.813	Escherichia coli	Escherichia coli (562)	Escherichia (561)	Enterobacteriaceae (543)	Enterobacterales (91347)	Gammaproteobacteria (1236)	Proteobacteria (1224)	Bacteria (2)	5.32012	4.32441
NZ_MT219819.1	0.0898429	0	82	356	circular	2020-08-04								IncX1_1, EU370913, |IncFIA(HI1)_1, AF250878, |IncFIB(K)_1, JN233704,	IncF RST(F-:A18:B-):FIA(18);FIB(-);FIC(-);FII(-);FIIK(-);FIIS(-);FIIY(-)	119180	50.3155	Escherichia coli	Escherichia coli (562)	Escherichia (561)	Enterobacteriaceae (543)	Enterobacterales (91347)	Gammaproteobacteria (1236)	Proteobacteria (1224)	Bacteria (2)	5.01913	5.05988
NZ_CP021857.1	0.0898429	0	82	357	circular	2017-06-21	missing				missing	missing		IncFII(Yp)_1, CP000670,	IncF RST(Y6:A-:B-):FIA(-);FIB(-);FIC(-);FII(-);FIIK(28?);FIIS(-);FIIY(6)	106331	54.1216	Klebsiella pneumoniae	Klebsiella pneumoniae (573)	Klebsiella (570)	Enterobacteriaceae (543)	Enterobacterales (91347)	Gammaproteobacteria (1236)	Proteobacteria (1224)	Bacteria (2)	5.4563	6.40461
NZ_MT219823.1	0.0898429	0	82	358	circular	2020-08-04								IncFIB(K)_1, JN233704, |IncFIA(HI1)_1, AF250878, |IncX1_1, EU370913,	IncF RST(F-:A18:B-):FIA(18);FIB(-);FIC(-);FII(-);FIIK(-);FIIS(-);FIIY(-)	119011	50.2945	Escherichia coli	Escherichia coli (562)	Escherichia (561)	Enterobacteriaceae (543)	Enterobacterales (91347)	Gammaproteobacteria (1236)	Proteobacteria (1224)	Bacteria (2)	4.91631	5.08154
CP059930.1	0.0898429	0	82	359	circular	2020-08-12	Canada	Canada	61.0667	-107.992		Turkey	fecal	IncFIB(K)_1, JN233704,	IncF RST(F-:A-:B-):FIA(-);FIB(-);FIC(-);FII(-);FIIK(-);FIIS(-);FIIY(-)	99943	53.5335	Escherichia coli	Escherichia coli (562)	Escherichia (561)	Enterobacteriaceae (543)	Enterobacterales (91347)	Gammaproteobacteria (1236)	Proteobacteria (1224)	Bacteria (2)	4.08744	6.03185
NC_019087.1	0.0898429	0	82	360	circular	2012-11-02								IncN_1, AY046276,	IncN MLST(8):repN(4);traJ(5);korA(1)	44216	51.0607	Escherichia coli O25b:H4-ST131	Escherichia coli (562)	Escherichia (561)	Enterobacteriaceae (543)	Enterobacterales (91347)	Gammaproteobacteria (1236)	Proteobacteria (1224)	Bacteria (2)	3.71686	4.89156
NC_021199.1	0.0898429	0	82	361	circular	2013-05-13								FIA(pBK30683)_1, KF954760, |IncFII(pKP91)_1, CP000966,	IncF RST(K12:A-:B-):FIA(21?);FIB(-);FIC(-);FII(-);FIIK(12);FIIS(-);FIIY(-)	141545	52.4928	Klebsiella pneumoniae subsp. pneumoniae KPX	Klebsiella pneumoniae (573)	Klebsiella (570)	Enterobacteriaceae (543)	Enterobacterales (91347)	Gammaproteobacteria (1236)	Proteobacteria (1224)	Bacteria (2)	5.98408	6.89316
CP042894.1	0.0898429	0	82	362	circular	2019-08-14	Egypt	Egypt	26.254	29.2675	Raw milk cheese	missing		IncQ1_1, M28829, |p0111_1, AP010962,		141344	50.116	Escherichia coli	Escherichia coli (562)	Escherichia (561)	Enterobacteriaceae (543)	Enterobacterales (91347)	Gammaproteobacteria (1236)	Proteobacteria (1224)	Bacteria (2)	-3.53663	-0.442297
NZ_CP045510.1	0.0898429	0	82	363	circular	2020-03-21	Taiwan: Linkou		24.91	121.3	meat			IncC_1, JN157804,		90966	52.7747	Salmonella enterica subsp. enterica serovar Anatum	Salmonella enterica (28901)	Salmonella (590)	Enterobacteriaceae (543)	Enterobacterales (91347)	Gammaproteobacteria (1236)	Proteobacteria (1224)	Bacteria (2)	1.44157	8.87364
NZ_CP045462.1	0.0898429	0	82	364	circular	2020-03-21	Taiwan: Linkou		24.91	121.3	meat			IncC_1, JN157804,		90138	52.7802	Salmonella enterica subsp. enterica serovar Anatum	Salmonella enterica (28901)	Salmonella (590)	Enterobacteriaceae (543)	Enterobacterales (91347)	Gammaproteobacteria (1236)	Proteobacteria (1224)	Bacteria (2)	1.45089	8.86489
NZ_CP045520.1	0.0898429	0	82	365	circular	2020-03-21	Taiwan: Linkou		24.91	121.3	clinical	Homo sapiens		IncC_1, JN157804,		90138	52.7802	Salmonella enterica subsp. enterica serovar Anatum	Salmonella enterica (28901)	Salmonella (590)	Enterobacteriaceae (543)	Enterobacterales (91347)	Gammaproteobacteria (1236)	Proteobacteria (1224)	Bacteria (2)	1.52596	8.86244
NZ_CP047460.1	0.0898429	0	82	366	circular	2020-03-04	China: Nantong, jiangsu province		31.41	120.11	a feces sample of swine origin			IncFIB(K)_1, JN233704, |IncX1_1, EU370913,	IncF RST(F-:A-:B-):FIA(-);FIB(-);FIC(-);FII(-);FIIK(-);FIIS(-);FIIY(-)	118248	51.2296	Escherichia coli	Escherichia coli (562)	Escherichia (561)	Enterobacteriaceae (543)	Enterobacterales (91347)	Gammaproteobacteria (1236)	Proteobacteria (1224)	Bacteria (2)	4.89757	5.03862
NZ_CP061064.1	0.0898429	0	82	367	circular	2020-09-10	Germany		53.4608	9.9836	rectal swab	Homo sapiens		IncR_1, DQ449578,		66330	51.7277	Klebsiella pneumoniae	Klebsiella pneumoniae (573)	Klebsiella (570)	Enterobacteriaceae (543)	Enterobacterales (91347)	Gammaproteobacteria (1236)	Proteobacteria (1224)	Bacteria (2)	4.58599	5.13537
NC_025186.1	0.0898429	0	82	368	circular	2014-09-29								IncN_1, AY046276,	IncN MLST(7):repN(3);traJ(4);korA(2)	59228	52.1307	Klebsiella pneumoniae subsp. pneumoniae	Klebsiella pneumoniae (573)	Klebsiella (570)	Enterobacteriaceae (543)	Enterobacterales (91347)	Gammaproteobacteria (1236)	Proteobacteria (1224)	Bacteria (2)	3.24039	5.2089
NZ_CP053047.1	0.0898429	0	82	369	circular	2020-05-28	China: Henan		35.12	113.37	feces	Gallus gallus		IncX1_1, EU370913,		57105	48.6262	Escherichia fergusonii	Escherichia fergusonii (564)	Escherichia (561)	Enterobacteriaceae (543)	Enterobacterales (91347)	Gammaproteobacteria (1236)	Proteobacteria (1224)	Bacteria (2)	5.28245	4.36242
NZ_CP029802.1	0.0898429	0	82	370	circular	2018-06-19	Taiwan		24.94	121.2	pus	Homo sapiens		IncC_1, JN157804,		90137	52.7941	Salmonella enterica subsp. enterica serovar Anatum	Salmonella enterica (28901)	Salmonella (590)	Enterobacteriaceae (543)	Enterobacterales (91347)	Gammaproteobacteria (1236)	Proteobacteria (1224)	Bacteria (2)	1.45295	8.87191
NZ_CP053729.1	0.0898429	0	82	371	circular	2020-06-02	China: Sichuan	China,Sichuan	30.5	102.5	slaughterhouse	pig	cell culture	IncFIB(K)_1, JN233704, |IncN_1, AY046276,	IncF RST(F-:A-:B-):FIA(-);FIB(-);FIC(-);FII(-);FIIK(-);FIIS(-);FIIY(-)|IncN MLST(-):repN(1);traJ(-);korA(-)	92076	51.5389	Escherichia coli	Escherichia coli (562)	Escherichia (561)	Enterobacteriaceae (543)	Enterobacterales (91347)	Gammaproteobacteria (1236)	Proteobacteria (1224)	Bacteria (2)	4.92414	5.07461
NZ_CP050835.1	0.0898429	0	82	372	circular	2020-04-09	China: Jiangxi		30.7	118.4	milk			pKPC-CAV1321_1, CP011611, |IncR_1, DQ449578,		340492	48.4531	Klebsiella pneumoniae	Klebsiella pneumoniae (573)	Klebsiella (570)	Enterobacteriaceae (543)	Enterobacterales (91347)	Gammaproteobacteria (1236)	Proteobacteria (1224)	Bacteria (2)	17.2651	5.56302
NZ_KY271413.1	0.0903831	0	81	373	circular	2020-06-03								IncN_1, AY046276,	IncN MLST(5):repN(2);traJ(3);korA(2)	54345	53.21	Klebsiella pneumoniae	Klebsiella pneumoniae (573)	Klebsiella (570)	Enterobacteriaceae (543)	Enterobacterales (91347)	Gammaproteobacteria (1236)	Proteobacteria (1224)	Bacteria (2)	3.4613	5.41712
NZ_MG557997.1	0.0903831	0	81	374	circular	2020-06-03								IncR_1, DQ449578,		46826	56.2145	Citrobacter freundii	Citrobacter freundii (546)	Citrobacter (544)	Enterobacteriaceae (543)	Enterobacterales (91347)	Gammaproteobacteria (1236)	Proteobacteria (1224)	Bacteria (2)	4.275	4.7474
NZ_MG557995.1	0.0903831	0	81	375	circular	2020-06-03								IncR_1, DQ449578,		46826	56.2166	Citrobacter freundii	Citrobacter freundii (546)	Citrobacter (544)	Enterobacteriaceae (543)	Enterobacterales (91347)	Gammaproteobacteria (1236)	Proteobacteria (1224)	Bacteria (2)	4.30709	4.7813
NZ_MG557994.1	0.0903831	0	81	376	circular	2020-06-03								IncR_1, DQ449578,		46826	56.2124	Citrobacter freundii	Citrobacter freundii (546)	Citrobacter (544)	Enterobacteriaceae (543)	Enterobacterales (91347)	Gammaproteobacteria (1236)	Proteobacteria (1224)	Bacteria (2)	4.33304	4.77561
NZ_MG557996.1	0.0903831	0	81	377	circular	2020-06-03								IncR_1, DQ449578,		46826	56.2145	Citrobacter freundii	Citrobacter freundii (546)	Citrobacter (544)	Enterobacteriaceae (543)	Enterobacterales (91347)	Gammaproteobacteria (1236)	Proteobacteria (1224)	Bacteria (2)	4.29634	4.7523
NZ_MF497780.1	0.0903831	0	81	378	circular	2020-06-03								IncR_1, DQ449578,		46826	56.2124	Citrobacter freundii	Citrobacter freundii (546)	Citrobacter (544)	Enterobacteriaceae (543)	Enterobacterales (91347)	Gammaproteobacteria (1236)	Proteobacteria (1224)	Bacteria (2)	4.33499	4.79803
NZ_MH917279.1	0.0903831	0	81	379	circular	2020-06-03								IncFII_1, AY458016, |IncR_1, DQ449578,	IncF RST(F2:A-:B-):FIA(-);FIB(-);FIC(-);FII(2);FIIK(-);FIIS(-);FIIY(-)	110946	52.9483	Klebsiella pneumoniae	Klebsiella pneumoniae (573)	Klebsiella (570)	Enterobacteriaceae (543)	Enterobacterales (91347)	Gammaproteobacteria (1236)	Proteobacteria (1224)	Bacteria (2)	0.71126	6.21721
CP028781.2	0.0903831	0	81	380	circular	2018-04-05	China: Yibin, Sichuan	China,Yibin,Sichuan	28.7989	104.729		Homo sapiens	Culture	IncFIB(K)_1, JN233704, |IncX3_1, JN247852,	IncF RST(F-:A-:B-):FIA(-);FIB(-);FIC(-);FII(-);FIIK(-);FIIS(-);FIIY(-)	159311	51.0662	Klebsiella pneumoniae subsp. pneumoniae	Klebsiella pneumoniae (573)	Klebsiella (570)	Enterobacteriaceae (543)	Enterobacterales (91347)	Gammaproteobacteria (1236)	Proteobacteria (1224)	Bacteria (2)	6.13415	7.91407
NZ_CP021177.1	0.0903831	0	81	381	not-set	2017-05-24	Taiwan: Tainan		23.02	120.22	urine	Homo sapiens				154099	48.5259	Escherichia coli	Escherichia coli (562)	Escherichia (561)	Enterobacteriaceae (543)	Enterobacterales (91347)	Gammaproteobacteria (1236)	Proteobacteria (1224)	Bacteria (2)	-3.00587	14.8875
NZ_AP018758.1	0.0903831	0	81	382	circular	2018-12-11	Japan	Japan	36.5748	139.239		Homo sapiens		IncN_1, AY046276,	IncN MLST(-):repN(2);traJ(3);korA(-)	47417	52.3104	Metakosakonia sp. MRY16-398	Metakosakonia sp. MRY16-398 (2487150)	Metakosakonia (2055876)	Enterobacteriaceae (543)	Enterobacterales (91347)	Gammaproteobacteria (1236)	Proteobacteria (1224)	Bacteria (2)	3.48857	5.18513
NZ_CP026757.1	0.0903831	0	81	383	circular	2018-03-03	missing				missing	missing		IncN_1, AY046276,	IncN MLST(5):repN(2);traJ(3);korA(2)	54418	52.1519	Klebsiella aerogenes	Klebsiella aerogenes (548)	Klebsiella (570)	Enterobacteriaceae (543)	Enterobacterales (91347)	Gammaproteobacteria (1236)	Proteobacteria (1224)	Bacteria (2)	3.49086	5.20935
NZ_CP038140.1	0.0903831	0	81	384	circular	2019-05-03	China: Guangxi		23.1	109.6	feces	pig		IncFIB(K)_1, JN233704, |IncFIA(HI1)_1, AF250878, |IncX1_1, EU370913,	IncF RST(F-:A18:B-):FIA(18);FIB(-);FIC(-);FII(-);FIIK(-);FIIS(-);FIIY(-)	138950	49.9741	Escherichia coli	Escherichia coli (562)	Escherichia (561)	Enterobacteriaceae (543)	Enterobacterales (91347)	Gammaproteobacteria (1236)	Proteobacteria (1224)	Bacteria (2)	4.90905	5.06828
NZ_KY748190.1	0.0909306	0	80	385	circular	2020-06-03								IncI1-I(Gamma)_1, AP005147,		122022	51.5899	Escherichia coli	Escherichia coli (562)	Escherichia (561)	Enterobacteriaceae (543)	Enterobacterales (91347)	Gammaproteobacteria (1236)	Proteobacteria (1224)	Bacteria (2)	7.30756	-3.92049
NZ_CP026496.1	0.0909306	0	80	386	circular	2018-05-03	Iran		35.6892	51.389	urine	Homo sapiens		IncN_1, AY046276,	IncN MLST(6):repN(2);traJ(4);korA(2)	58110	51.7295	Klebsiella pneumoniae	Klebsiella pneumoniae (573)	Klebsiella (570)	Enterobacteriaceae (543)	Enterobacterales (91347)	Gammaproteobacteria (1236)	Proteobacteria (1224)	Bacteria (2)	3.27338	5.25905
AP022501.1	0.0909306	0	80	387	circular	2020-10-09	Japan:Tokyo	Japan,Tokyo	34.6969	139.405						97602	56.2427	Enterobacter kobei	Enterobacter kobei (208224)	Enterobacter (547)	Enterobacteriaceae (543)	Enterobacterales (91347)	Gammaproteobacteria (1236)	Proteobacteria (1224)	Bacteria (2)	3.94965	7.25597
NZ_CP043516.1	0.0909306	0	80	388	circular	2019-09-14	United Kingdom:London	United Kingdom,London	51.5073	-0.127647	screening swab	Homo sapiens	pure culture	IncN3_1, EF219134,	IncN MLST(-):repN(-);traJ(-);korA(-);(-);(-);(-);(-)	56515	52.8709	Enterobacter kobei	Enterobacter kobei (208224)	Enterobacter (547)	Enterobacteriaceae (543)	Enterobacterales (91347)	Gammaproteobacteria (1236)	Proteobacteria (1224)	Bacteria (2)	3.30804	6.31896
NZ_CP031109.1	0.0909306	0	80	389	circular	2018-07-26	China:Sichuan	China,Sichuan	30.5	102.5	feces	Giant panda	fece sample	IncN_1, AY046276,	IncN MLST(8):repN(4);traJ(5);korA(1)	46827	51.2439	Escherichia coli	Escherichia coli (562)	Escherichia (561)	Enterobacteriaceae (543)	Enterobacterales (91347)	Gammaproteobacteria (1236)	Proteobacteria (1224)	Bacteria (2)	3.67715	4.91416
NZ_CP025233.1	0.0909306	0	80	390	circular	2019-02-07	USA: BIFSCo Region 2	USA	39.7837	-100.446	bovine hide	Bovine	missing	IncN_1, AY046276,	IncN MLST(3):repN(1);traJ(8);korA(1)	60586	53.5833	Salmonella enterica subsp. enterica serovar Newport str. USDA-ARS-USMARC-1925	Salmonella enterica (28901)	Salmonella (590)	Enterobacteriaceae (543)	Enterobacterales (91347)	Gammaproteobacteria (1236)	Proteobacteria (1224)	Bacteria (2)	3.6945	4.8678
NZ_CP052872.1	0.0909306	0	80	391	circular	2020-05-06	Italy: Milan		45.46	9.19	blood	Homo sapiens		IncN_1, AY046276,	IncN MLST(7):repN(3);traJ(4);korA(2)	66249	53.3668	Enterobacter cloacae	Enterobacter cloacae (550)	Enterobacter (547)	Enterobacteriaceae (543)	Enterobacterales (91347)	Gammaproteobacteria (1236)	Proteobacteria (1224)	Bacteria (2)	3.23329	5.15116
NZ_CP045459.1	0.0909306	0	80	392	circular	2020-03-21	Taiwan: Linkou		24.91	121.3	meat			IncC_1, JN157804,		89619	52.7109	Salmonella enterica subsp. enterica serovar Anatum	Salmonella enterica (28901)	Salmonella (590)	Enterobacteriaceae (543)	Enterobacterales (91347)	Gammaproteobacteria (1236)	Proteobacteria (1224)	Bacteria (2)	1.44649	8.86229
NZ_CP022443.1	0.0909306	0	80	393	circular	2019-01-12								IncFIA(HI1)_1, AF250878, |Col(pHAD28)_1, KU674895,	IncF RST(F-:A-:B-):FIA(~22);FIB(-);FIC(-);FII(-);FIIK(-);FIIS(-);FIIY(-)	38669	49.3858	Klebsiella sp. LY	Klebsiella sp. LY (2015795)	Klebsiella (570)	Enterobacteriaceae (543)	Enterobacterales (91347)	Gammaproteobacteria (1236)	Proteobacteria (1224)	Bacteria (2)	4.66914	5.10182
NZ_CP032888.1	0.0909306	0	80	394	circular	2018-10-10	China: Sichuan	China,Sichuan	30.5	102.5		Homo sapiens	Culture	IncI1-I(Gamma)_1, AP005147,		109553	50.3747	Escherichia coli	Escherichia coli (562)	Escherichia (561)	Enterobacteriaceae (543)	Enterobacterales (91347)	Gammaproteobacteria (1236)	Proteobacteria (1224)	Bacteria (2)	7.44864	-3.63783
NZ_CP054287.1	0.0909306	0	80	395	circular	2020-08-13	USA:Maine		45	-69	Rectal swab	Homo sapiens		FIA(pBK30683)_1, KF954760, |IncFII(pKP91)_1, CP000966,	IncF RST(K12:A-:B-):FIA(~21);FIB(-);FIC(-);FII(-);FIIK(12);FIIS(-);FIIY(-)	156980	51.8021	Klebsiella pneumoniae	Klebsiella pneumoniae (573)	Klebsiella (570)	Enterobacteriaceae (543)	Enterobacterales (91347)	Gammaproteobacteria (1236)	Proteobacteria (1224)	Bacteria (2)	5.96843	6.83595
NZ_MF344559.1	0.0914855	0	79	396	circular	2020-06-03								IncN_1, AY046276,	IncN MLST(7):repN(3);traJ(4);korA(2)	42279	50.3134	Enterobacter hormaechei	Enterobacter hormaechei (158836)	Enterobacter (547)	Enterobacteriaceae (543)	Enterobacterales (91347)	Gammaproteobacteria (1236)	Proteobacteria (1224)	Bacteria (2)	3.25244	5.22983
KX863569.1	0.0914855	0	79	397	circular	2017-04-26								IncN3_1, EF219134,	IncN MLST(-):repN(-);traJ(-);korA(-);(-);(-);(-);(-)	47640	50.6633	uncultured bacterium	uncultured bacterium (77133)						Bacteria (2)	3.32961	6.33071
NZ_CP019053.1	0.0914855	0	79	398	circular	2018-01-11	Hong Kong		22.28	114.14	Rectal Swab	Homo sapiens		IncC_1, JN157804,		155802	52.5815	Escherichia coli	Escherichia coli (562)	Escherichia (561)	Enterobacteriaceae (543)	Enterobacterales (91347)	Gammaproteobacteria (1236)	Proteobacteria (1224)	Bacteria (2)	1.95176	9.30012
NZ_MT219826.1	0.0914855	0	79	399	circular	2020-08-04								IncFIB(K)_1, JN233704, |IncFIA(HI1)_1, AF250878, |IncX1_1, EU370913,	IncF RST(F-:A18:B-):FIA(18);FIB(-);FIC(-);FII(-);FIIK(-);FIIS(-);FIIY(-)	122608	51.1427	Escherichia coli	Escherichia coli (562)	Escherichia (561)	Enterobacteriaceae (543)	Enterobacterales (91347)	Gammaproteobacteria (1236)	Proteobacteria (1224)	Bacteria (2)	4.94802	5.09545
NZ_MT219818.1	0.0914855	0	79	400	circular	2020-08-04								IncFIB(K)_1, JN233704, |IncFIA(HI1)_1, AF250878, |IncX1_1, EU370913,	IncF RST(F-:A18:B-):FIA(18);FIB(-);FIC(-);FII(-);FIIK(-);FIIS(-);FIIY(-)	119185	50.951	Escherichia coli	Escherichia coli (562)	Escherichia (561)	Enterobacteriaceae (543)	Enterobacterales (91347)	Gammaproteobacteria (1236)	Proteobacteria (1224)	Bacteria (2)	4.94182	5.06323
NZ_CP041453.1	0.0914855	0	79	401	circular	2019-10-07	China: Yangzhou		32.24	119.26	Pork			IncFIB(K)_1, JN233704, |IncFIA(HI1)_1, AF250878, |IncX1_1, EU370913,	IncF RST(F-:A18:B-):FIA(18);FIB(-);FIC(-);FII(-);FIIK(-);FIIS(-);FIIY(-)	92973	49.3315	Escherichia coli	Escherichia coli (562)	Escherichia (561)	Enterobacteriaceae (543)	Enterobacterales (91347)	Gammaproteobacteria (1236)	Proteobacteria (1224)	Bacteria (2)	4.93569	5.06425
NZ_CP007636.1	0.0914855	0	79	402	circular	2015-01-21	Haiti	Haiti	19.14	-72.3571	missing	Homo sapiens		IncC_1, JN157804,		167267	52.363	Vibrio cholerae	Vibrio cholerae (666)	Vibrio (662)	Vibrionaceae (641)	Vibrionales (135623)	Gammaproteobacteria (1236)	Proteobacteria (1224)	Bacteria (2)	1.33509	9.52502
NZ_MN423364.1	0.0914855	0	79	403	circular	2020-09-23								IncFIB(K)(pCAV1099-114)_1, CP011596,	IncF RST(F-:A-:B-):FIA(-);FIB(-);FIC(-);FII(-);FIIK(-);FIIS(-);FIIY(-)	244456	51.559	Klebsiella pneumoniae	Klebsiella pneumoniae (573)	Klebsiella (570)	Enterobacteriaceae (543)	Enterobacterales (91347)	Gammaproteobacteria (1236)	Proteobacteria (1224)	Bacteria (2)	5.15488	8.01751
LR890712.1	0.0914855	0	79	404	circular	2020-10-30	Australia: Melbourne		-37.8457	144.982	rectal swab	Homo sapiens		IncR_1, DQ449578,		76475	51.6875	Klebsiella pneumoniae	Klebsiella pneumoniae (573)	Klebsiella (570)	Enterobacteriaceae (543)	Enterobacterales (91347)	Gammaproteobacteria (1236)	Proteobacteria (1224)	Bacteria (2)	4.70055	5.47341
NZ_CP053724.1	0.0914855	0	79	405	circular	2020-06-02	China: Sichuan	China,Sichuan	30.5	102.5	slaughterhouse	pig	cell culture	IncFIB(AP001918)_1, AP001918, |IncFIC(FII)_1, AP001918,	IncF RST(F46:A-:B-):FIA(-);FIB(20?);FIC(~4);FII(46);FIIK(-);FIIS(-);FIIY(-)	99734	51.8018	Escherichia coli	Escherichia coli (562)	Escherichia (561)	Enterobacteriaceae (543)	Enterobacterales (91347)	Gammaproteobacteria (1236)	Proteobacteria (1224)	Bacteria (2)	-0.479307	6.11585
NZ_MT560079.1	0.0914855	0	79	406	circular	2020-11-17								IncFIB(K)_1, JN233704,	IncF RST(F-:A-:B-):FIA(-);FIB(-);FIC(-);FII(-);FIIK(-);FIIS(-);FIIY(-)	68684	50.6464	Klebsiella pneumoniae	Klebsiella pneumoniae (573)	Klebsiella (570)	Enterobacteriaceae (543)	Enterobacterales (91347)	Gammaproteobacteria (1236)	Proteobacteria (1224)	Bacteria (2)	5.65685	8.22457
NZ_CP021753.1	0.0914855	0	79	407	circular	2017-06-15	missing				missing	missing		IncFII(Yp)_1, CP000670,	IncF RST(Y6:A-:B-):FIA(-);FIB(-);FIC(-);FII(-);FIIK(28?);FIIS(-);FIIY(6)	116187	53.308	Klebsiella pneumoniae	Klebsiella pneumoniae (573)	Klebsiella (570)	Enterobacteriaceae (543)	Enterobacterales (91347)	Gammaproteobacteria (1236)	Proteobacteria (1224)	Bacteria (2)	5.47913	6.39919
NZ_CP018989.1	0.0920479	0	78	408	circular	2017-03-06	Italy: Pisa		43.72	10.4		Homo sapiens		IncFII(K)_1, CP000648, |IncFIA(HI1)_1, AF250878, |IncR_1, DQ449578,	IncF RST(K2:A13:B-):FIA(13);FIB(-);FIC(-);FII(-);FIIK(2);FIIS(-);FIIY(-)	85865	54.4506	Escherichia coli	Escherichia coli (562)	Escherichia (561)	Enterobacteriaceae (543)	Enterobacterales (91347)	Gammaproteobacteria (1236)	Proteobacteria (1224)	Bacteria (2)	6.11977	6.15233
NZ_CP031723.1	0.0920479	0	78	409	circular	2018-09-02	China: Sichuan, Chengdu	China,Sichuan,Chengdu	30.6766	104.061		Homo sapiens	Pure Culture	IncFII(pECLA)_1, CP001919, |IncFIB(pECLA)_1, CP001919,	IncF RST(F-:A-:B-):FIA(-);FIB(-);FIC(-);FII(-);FIIK(-);FIIS(-);FIIY(-)	88009	51.5606	Enterobacter hormaechei	Enterobacter hormaechei (158836)	Enterobacter (547)	Enterobacteriaceae (543)	Enterobacterales (91347)	Gammaproteobacteria (1236)	Proteobacteria (1224)	Bacteria (2)	4.91279	7.05378
NZ_MN891686.1	0.0920479	0	78	410	circular	2020-08-04								IncR_1, DQ449578, |IncN_1, AY046276, |IncFII(pHN7A8)_1, JN232517,	IncN MLST(-):repN(2);traJ(-);korA(-)|IncF RST(F33:A-:B-):FIA(-);FIB(-);FIC(5?);FII(33);FIIK(-);FIIS(-);FIIY(-)	118963	54.5119	Klebsiella pneumoniae	Klebsiella pneumoniae (573)	Klebsiella (570)	Enterobacteriaceae (543)	Enterobacterales (91347)	Gammaproteobacteria (1236)	Proteobacteria (1224)	Bacteria (2)	5.74524	2.97277
NZ_CP045517.1	0.0920479	0	78	411	circular	2020-03-21	Taiwan: Linkou		24.91	121.3	clinical	Homo sapiens		IncC_1, JN157804,		86794	52.5082	Salmonella enterica subsp. enterica serovar Anatum	Salmonella enterica (28901)	Salmonella (590)	Enterobacteriaceae (543)	Enterobacterales (91347)	Gammaproteobacteria (1236)	Proteobacteria (1224)	Bacteria (2)	1.4533	8.85902
NZ_LT904892.1	0.0920479	0	78	412	linear	2017-08-04								IncC_1, JN157804,		192619	52.338	Salmonella enterica subsp. enterica serovar Typhi	Salmonella enterica (28901)	Salmonella (590)	Enterobacteriaceae (543)	Enterobacterales (91347)	Gammaproteobacteria (1236)	Proteobacteria (1224)	Bacteria (2)	2.01275	9.28107
NZ_LS992184.1	0.0920479	0	78	413	circular	2019-01-29								IncC_1, JN157804, |IncFII_1, AY458016,	IncF RST(F2:A-:B-):FIA(-);FIB(-);FIC(-);FII(2);FIIK(-);FIIS(-);FIIY(-)	185156	52.3634	Citrobacter freundii	Citrobacter freundii (546)	Citrobacter (544)	Enterobacteriaceae (543)	Enterobacterales (91347)	Gammaproteobacteria (1236)	Proteobacteria (1224)	Bacteria (2)	1.30004	9.06382
NC_014231.1	0.0920479	0	78	414	circular	2010-06-11								IncN_1, AY046276,	IncN MLST(8):repN(4);traJ(5);korA(1)	53207	51.9706	Escherichia coli O25b:H4-ST131	Escherichia coli (562)	Escherichia (561)	Enterobacteriaceae (543)	Enterobacterales (91347)	Gammaproteobacteria (1236)	Proteobacteria (1224)	Bacteria (2)	3.67616	4.90837
NZ_MG764553.1	0.0926182	0	77	415	circular	2020-06-03								IncFII(pHN7A8)_1, JN232517, |IncN_1, AY046276,	IncF RST(F33:A-:B-):FIA(-);FIB(-);FIC(5?);FII(33);FIIK(-);FIIS(-);FIIY(-)|IncN MLST(6):repN(2);traJ(4);korA(2)	153274	54.2917	Klebsiella pneumoniae	Klebsiella pneumoniae (573)	Klebsiella (570)	Enterobacteriaceae (543)	Enterobacterales (91347)	Gammaproteobacteria (1236)	Proteobacteria (1224)	Bacteria (2)	5.70505	2.86294
NZ_MH491967.1	0.0926182	0	77	416	circular	2020-06-03										145619	42.8371	Proteus mirabilis	Proteus mirabilis (584)	Proteus (583)	Morganellaceae (1903414)	Enterobacterales (91347)	Gammaproteobacteria (1236)	Proteobacteria (1224)	Bacteria (2)	2.82016	7.03638
NZ_MH594579.1	0.0926182	0	77	417	circular	2020-06-03								Col(pHAD28)_1, KU674895,		21079	58.1764	Pseudomonas aeruginosa	Pseudomonas aeruginosa (287)	Pseudomonas (286)	Pseudomonadaceae (135621)	Pseudomonadales (72274)	Gammaproteobacteria (1236)	Proteobacteria (1224)	Bacteria (2)	4.06293	4.2484
NZ_CP050740.1	0.0926182	0	77	418	circular	2020-04-08	China:Shanghai		31.23	121.47	Diarrheal patient	Homo sapiens		IncC_1, JN157804,		137774	53.4419	Salmonella enterica subsp. enterica serovar Typhimurium	Salmonella enterica (28901)	Salmonella (590)	Enterobacteriaceae (543)	Enterobacterales (91347)	Gammaproteobacteria (1236)	Proteobacteria (1224)	Bacteria (2)	1.29939	9.09861
NZ_CP043936.1	0.0926182	0	77	419	circular	2019-09-24	China	China	34.4118	86.0327		chicken	single cell	IncFII(K)_1, CP000648, |IncR_1, DQ449578,	IncF RST(K2:A-:B-):FIA(-);FIB(-);FIC(-);FII(-);FIIK(2);FIIS(-);FIIY(-)	82768	52.4635	Klebsiella pneumoniae	Klebsiella pneumoniae (573)	Klebsiella (570)	Enterobacteriaceae (543)	Enterobacterales (91347)	Gammaproteobacteria (1236)	Proteobacteria (1224)	Bacteria (2)	4.39978	4.85554
NZ_AP022357.1	0.0926182	0	77	420	circular	2020-08-04	Japan:Osaka	Japan,Osaka	34.6938	135.501		Homo sapiens		IncFIB(AP001918)_1, AP001918, |IncFIA_1, AP001918,	IncF RST(F-:A-:B-):FIA(2?);FIB(20?);FIC(-);FII(-);FIIK(-);FIIS(-);FIIY(-)	67735	50.5972	Escherichia coli	Escherichia coli (562)	Escherichia (561)	Enterobacteriaceae (543)	Enterobacterales (91347)	Gammaproteobacteria (1236)	Proteobacteria (1224)	Bacteria (2)	3.87928	-2.0699
NZ_CP042533.1	0.0926182	0	77	421	circular	2019-10-13	Australia: Sydney	Australia,Sydney	-33.8548	151.216	clinical sample	Homo sapiens	Whole organism	IncN_1, AY046276,	IncN MLST(9):repN(5);traJ(6);korA(3)	51987	51.5956	Klebsiella aerogenes	Klebsiella aerogenes (548)	Klebsiella (570)	Enterobacteriaceae (543)	Enterobacterales (91347)	Gammaproteobacteria (1236)	Proteobacteria (1224)	Bacteria (2)	3.46543	5.51736
NZ_CP021545.1	0.0926182	0	77	422	circular	2017-06-10	missing				missing	missing		IncFII(Yp)_1, CP000670,	IncF RST(Y6:A-:B-):FIA(-);FIB(-);FIC(-);FII(-);FIIK(28?);FIIS(-);FIIY(6)	125536	53.6165	Klebsiella pneumoniae	Klebsiella pneumoniae (573)	Klebsiella (570)	Enterobacteriaceae (543)	Enterobacterales (91347)	Gammaproteobacteria (1236)	Proteobacteria (1224)	Bacteria (2)	5.49395	6.42494
NZ_CP045514.1	0.0926182	0	77	423	circular	2020-03-21	Taiwan: Linkou		24.91	121.3	clinical	Homo sapiens		IncFIB(K)_1, JN233704,	IncF RST(F-:A-:B-):FIA(-);FIB(-);FIC(-);FII(-);FIIK(-);FIIS(-);FIIY(-)	77622	55.2421	Salmonella enterica subsp. enterica serovar Anatum	Salmonella enterica (28901)	Salmonella (590)	Enterobacteriaceae (543)	Enterobacterales (91347)	Gammaproteobacteria (1236)	Proteobacteria (1224)	Bacteria (2)	4.10988	6.04431
NZ_CP006665.1	0.0926182	0	77	424	circular	2015-01-21						Anguilla japonica				127046	47.4757	Edwardsiella anguillarum ET080813	Edwardsiella anguillarum (1821960)	Edwardsiella (635)	Hafniaceae (1903412)	Enterobacterales (91347)	Gammaproteobacteria (1236)	Proteobacteria (1224)	Bacteria (2)	4.53211	5.30177
NZ_MG874044.1	0.0926182	0	77	425	circular	2020-07-01								IncFIB(K)_1, JN233704,	IncF RST(F-:A-:B-):FIA(-);FIB(-);FIC(-);FII(-);FIIK(-);FIIS(-);FIIY(-)	104666	53.9583	Salmonella sp.	Salmonella sp. (599)	Salmonella (590)	Enterobacteriaceae (543)	Enterobacterales (91347)	Gammaproteobacteria (1236)	Proteobacteria (1224)	Bacteria (2)	4.12565	5.92449
NZ_MH760469.1	0.0931964	0	76	426	circular	2020-06-03								IncC_1, JN157804,		179850	50.9769	Salmonella enterica	Salmonella enterica (28901)	Salmonella (590)	Enterobacteriaceae (543)	Enterobacterales (91347)	Gammaproteobacteria (1236)	Proteobacteria (1224)	Bacteria (2)	1.35694	9.51755
CP064667.1	0.0931964	0	76	427	circular	2020-11-17	China:Shandong		37	117	Chicken meat			IncQ1_1, M28829, |IncHI2_1, BX664015, |IncHI2A_1, BX664015,	IncHI2 DLST(-):smr0018(3);smr0199(-)	202724	48.0787	Salmonella sp. SJTUF14154	Salmonella sp. SJTUF14154 (2745893)	Salmonella (590)	Enterobacteriaceae (543)	Enterobacterales (91347)	Gammaproteobacteria (1236)	Proteobacteria (1224)	Bacteria (2)	-2.89436	14.7333
NZ_MT554516.1	0.0931964	0	76	428	circular	2020-09-30								IncI2_1, KP347127, |IncN_1, AY046276, |IncX1_1, EU370913,	IncN MLST(-):repN(4);traJ(-);korA(-)	126764	47.8677	Escherichia coli	Escherichia coli (562)	Escherichia (561)	Enterobacteriaceae (543)	Enterobacterales (91347)	Gammaproteobacteria (1236)	Proteobacteria (1224)	Bacteria (2)	10.1578	-4.71015
NZ_CP021758.1	0.0931964	0	76	429	circular	2017-06-15	missing				missing	missing		IncFII(pKPX1)_1, AP012055,	IncF RST(F-:A-:B-):FIA(-);FIB(-);FIC(-);FII(-);FIIK(-);FIIS(-);FIIY(-)	121057	53.2427	Klebsiella pneumoniae	Klebsiella pneumoniae (573)	Klebsiella (570)	Enterobacteriaceae (543)	Enterobacterales (91347)	Gammaproteobacteria (1236)	Proteobacteria (1224)	Bacteria (2)	16.4786	1.95748
NZ_CP019074.1	0.0931964	0	76	430	circular	2018-01-11	China: Shenzhen		22.28	114.14	Rectal Swab	Homo sapiens		IncFIB(AP001918)_1, AP001918,	IncF RST(F-:A-:B-):FIA(-);FIB(24?);FIC(-);FII(-);FIIK(-);FIIS(-);FIIY(-)	73992	52.8017	Escherichia coli	Escherichia coli (562)	Escherichia (561)	Enterobacteriaceae (543)	Enterobacterales (91347)	Gammaproteobacteria (1236)	Proteobacteria (1224)	Bacteria (2)	4.59605	4.90537
NZ_CP050361.1	0.0931964	0	76	431	circular	2020-04-01	Czech Republic: Prague		50.08	14.36	Rectal swab	Homo sapiens		IncFII(pKPX1)_1, AP012055,	IncF RST(F-:A-:B-):FIA(-);FIB(-);FIC(-);FII(-);FIIK(-);FIIS(-);FIIY(-)	107451	52.9832	Klebsiella pneumoniae	Klebsiella pneumoniae (573)	Klebsiella (570)	Enterobacteriaceae (543)	Enterobacterales (91347)	Gammaproteobacteria (1236)	Proteobacteria (1224)	Bacteria (2)	16.4808	1.95528
NZ_MN824001.1	0.0931964	0	76	432	circular	2020-08-04								IncFII(K)_1, CP000648, |IncQ1_1, M28829,	IncF RST(K2:A-:B-):FIA(-);FIB(-);FIC(-);FII(-);FIIK(2);FIIS(-);FIIY(-)	79463	53.9975	Klebsiella pneumoniae	Klebsiella pneumoniae (573)	Klebsiella (570)	Enterobacteriaceae (543)	Enterobacterales (91347)	Gammaproteobacteria (1236)	Proteobacteria (1224)	Bacteria (2)	6.27316	6.75145
NZ_MN848327.1	0.0931964	0	76	433	circular	2020-08-04								IncFIB(AP001918)_1, AP001918,	IncF RST(F-:A-:B1):FIA(-);FIB(1);FIC(-);FII(-);FIIK(-);FIIS(-);FIIY(-)	108982	49.9202	Escherichia coli	Escherichia coli (562)	Escherichia (561)	Enterobacteriaceae (543)	Enterobacterales (91347)	Gammaproteobacteria (1236)	Proteobacteria (1224)	Bacteria (2)	-1.59414	6.38422
NZ_CP060738.1	0.0931964	0	76	434	circular	2020-09-09	China: Guangdong		22.38	114.05	sewage water			IncFIB(pECLA)_1, CP001919,	IncF RST(F-:A-:B-):FIA(-);FIB(-);FIC(-);FII(-);FIIK(-);FIIS(-);FIIY(-)	100102	51.6983	Enterobacter roggenkampii	Enterobacter roggenkampii (1812935)	Enterobacter (547)	Enterobacteriaceae (543)	Enterobacterales (91347)	Gammaproteobacteria (1236)	Proteobacteria (1224)	Bacteria (2)	4.38302	5.72286
NZ_CP053037.1	0.0931964	0	76	435	circular	2020-09-14	Brazil: Sao Paulo		-23.5975	-46.6436	blood	Homo sapiens		IncFIA(HI1)_1, AF250878,	IncF RST(F-:A10:B-):FIA(10);FIB(-);FIC(-);FII(-);FIIK(-);FIIS(-);FIIY(-)	85168	52.454	Klebsiella pneumoniae	Klebsiella pneumoniae (573)	Klebsiella (570)	Enterobacteriaceae (543)	Enterobacterales (91347)	Gammaproteobacteria (1236)	Proteobacteria (1224)	Bacteria (2)	5.84877	6.48864
CP052219.1	0.0931964	0	76	436	circular	2020-05-04	South Korea: Jeonnam		34.87	126.99	blood	Homo sapiens		IncR_1, DQ449578,		107637	51.2733	Klebsiella pneumoniae	Klebsiella pneumoniae (573)	Klebsiella (570)	Enterobacteriaceae (543)	Enterobacterales (91347)	Gammaproteobacteria (1236)	Proteobacteria (1224)	Bacteria (2)	5.95118	6.54811
NC_019389.1	0.0931964	0	76	437	circular	2012-11-09								IncFII(K)_1, CP000648,	IncF RST(K7:A-:B-):FIA(-);FIB(-);FIC(-);FII(-);FIIK(7);FIIS(-);FIIY(-)	127508	52.7959	Klebsiella pneumoniae	Klebsiella pneumoniae (573)	Klebsiella (570)	Enterobacteriaceae (543)	Enterobacterales (91347)	Gammaproteobacteria (1236)	Proteobacteria (1224)	Bacteria (2)	6.03572	6.58576
CP052784.1	0.0931964	0	76	438	circular	2020-05-19	USA:NY	USA,NY	43.1562	-75.845	Chicken Wings					57540	50.2103	Salmonella enterica subsp. enterica serovar Infantis	Salmonella enterica (28901)	Salmonella (590)	Enterobacteriaceae (543)	Enterobacterales (91347)	Gammaproteobacteria (1236)	Proteobacteria (1224)	Bacteria (2)	6.34422	-3.32213
NZ_CP063279.1	0.0931964	0	76	439	circular	2020-10-30	Russia:Moscow		55.8	37.6	Postoperative wound	Homo sapiens		IncFII(K)_1, CP000648,	IncF RST(K7:A-:B-):FIA(-);FIB(-);FIC(-);FII(-);FIIK(7);FIIS(-);FIIY(-)	127014	52.6808	Klebsiella pneumoniae	Klebsiella pneumoniae (573)	Klebsiella (570)	Enterobacteriaceae (543)	Enterobacterales (91347)	Gammaproteobacteria (1236)	Proteobacteria (1224)	Bacteria (2)	6.02115	6.61072
NZ_MT560062.1	0.0937829	0	75	440	circular	2020-11-17										105291	52.7718	Klebsiella pneumoniae	Klebsiella pneumoniae (573)	Klebsiella (570)	Enterobacteriaceae (543)	Enterobacterales (91347)	Gammaproteobacteria (1236)	Proteobacteria (1224)	Bacteria (2)	6.02303	6.57492
NZ_CP059887.1	0.0937829	0	75	441	circular	2020-08-12	China:Shanghai		31.23	121.47	Urine sample	Homo sapiens		IncHI2A_1, BX664015, |IncHI2_1, BX664015,	IncHI2 DLST(-):smr0018(1);smr0199(-)	277539	47.5602	Salmonella enterica subsp. diarizonae serovar b,50:-:-	Salmonella enterica (28901)	Salmonella (590)	Enterobacteriaceae (543)	Enterobacterales (91347)	Gammaproteobacteria (1236)	Proteobacteria (1224)	Bacteria (2)	-2.25115	12.1428
CP056583.1	0.0937829	0	75	442	circular	2020-07-27	United Kingdom	United Kingdom	54.7024	-3.27658	Wastewater influent sample		culture	IncFII(K)_1, CP000648,	IncF RST(K7:A-:B-):FIA(-);FIB(-);FIC(-);FII(-);FIIK(7);FIIS(-);FIIY(-)	131869	52.7266	Klebsiella oxytoca	Klebsiella oxytoca (571)	Klebsiella (570)	Enterobacteriaceae (543)	Enterobacterales (91347)	Gammaproteobacteria (1236)	Proteobacteria (1224)	Bacteria (2)	6.04341	6.60567
NZ_CP061400.1	0.0937829	0	75	443	circular	2020-09-11	USA: Chicago, IL		41.8945	-87.6208	unknown	Homo sapiens		FII(pBK30683)_1, KF954760,		128320	53.0237	Klebsiella pneumoniae	Klebsiella pneumoniae (573)	Klebsiella (570)	Enterobacteriaceae (543)	Enterobacterales (91347)	Gammaproteobacteria (1236)	Proteobacteria (1224)	Bacteria (2)	5.56687	6.35527
NZ_CP034137.1	0.0937829	0	75	444	circular	2018-11-27	Nigeria	Nigeria	9.60004	7.99997	blood	Homo sapiens		IncFII(K)_1, CP000648,	IncF RST(K7:A-:B-):FIA(-);FIB(-);FIC(-);FII(-);FIIK(7);FIIS(-);FIIY(-)	150833	52.7358	Klebsiella quasipneumoniae subsp. similipneumoniae	Klebsiella quasipneumoniae (1463165)	Klebsiella (570)	Enterobacteriaceae (543)	Enterobacterales (91347)	Gammaproteobacteria (1236)	Proteobacteria (1224)	Bacteria (2)	6.04945	6.59983
NZ_CP063762.1	0.0937829	0	75	445	circular	2020-11-05	China: Anhui		31.8528	117.26	missing	Homo sapiens		IncR_1, DQ449578,		65935	54.2929	Klebsiella pneumoniae	Klebsiella pneumoniae (573)	Klebsiella (570)	Enterobacteriaceae (543)	Enterobacterales (91347)	Gammaproteobacteria (1236)	Proteobacteria (1224)	Bacteria (2)	5.74455	3.03124
NZ_CP018944.1	0.0937829	0	75	446	circular	2017-03-06	Viet Nam: Hanoi		21.02	105.83		Homo sapiens				27133	54.2881	Escherichia coli	Escherichia coli (562)	Escherichia (561)	Enterobacteriaceae (543)	Enterobacterales (91347)	Gammaproteobacteria (1236)	Proteobacteria (1224)	Bacteria (2)	4.57721	4.5018
NZ_CP034131.1	0.0937829	0	75	447	circular	2018-11-27	Nigeria	Nigeria	9.60004	7.99997	blood	Homo sapiens		IncFII(K)_1, CP000648,	IncF RST(K7:A-:B-):FIA(-);FIB(-);FIC(-);FII(-);FIIK(7);FIIS(-);FIIY(-)	136368	52.9032	Klebsiella quasipneumoniae	Klebsiella quasipneumoniae (1463165)	Klebsiella (570)	Enterobacteriaceae (543)	Enterobacterales (91347)	Gammaproteobacteria (1236)	Proteobacteria (1224)	Bacteria (2)	6.05327	6.59512
NC_014208.1	0.0937829	0	75	448	circular	2010-06-07								IncN_1, AY046276,	IncN MLST(7):repN(3);traJ(4);korA(2)	54641	51.8237	Klebsiella oxytoca KOX105	Klebsiella oxytoca (571)	Klebsiella (570)	Enterobacteriaceae (543)	Enterobacterales (91347)	Gammaproteobacteria (1236)	Proteobacteria (1224)	Bacteria (2)	3.25919	5.21995
NZ_CP035277.1	0.0937829	0	75	449	circular	2019-01-26	China: Taizhou	China,Taizhou	32.485	119.912	wastewater treatment plant		cell culture	IncFIB(pB171)_1, AB024946, |IncFII(Yp)_1, CP000670,	IncF RST(Y3:A-:B-):FIA(-);FIB(70?);FIC(-);FII(-);FIIK(-);FIIS(-);FIIY(3)	206820	53.8067	Citrobacter freundii	Citrobacter freundii (546)	Citrobacter (544)	Enterobacteriaceae (543)	Enterobacterales (91347)	Gammaproteobacteria (1236)	Proteobacteria (1224)	Bacteria (2)	4.06539	7.35398
CP052491.1	0.0937829	0	75	450	circular	2020-05-04	South Korea: Gyeonggi		37.66	126.77	blood	Homo sapiens		IncFIB(K)_1, JN233704, |IncFII(pKP91)_1, CP000966,	IncF RST(K9:A-:B-):FIA(-);FIB(-);FIC(-);FII(-);FIIK(9);FIIS(-);FIIY(-)	247408	51.6325	Klebsiella pneumoniae	Klebsiella pneumoniae (573)	Klebsiella (570)	Enterobacteriaceae (543)	Enterobacterales (91347)	Gammaproteobacteria (1236)	Proteobacteria (1224)	Bacteria (2)	5.72079	8.42559
NZ_CP026180.1	0.0937829	0	75	451	circular	2018-01-31	USA		38.9847	-77.0947				IncFIB(K)_1, JN233704, |IncFII(K)_1, CP000648,	IncF RST(K15:A-:B-):FIA(-);FIB(-);FIC(-);FII(-);FIIK(15);FIIS(-);FIIY(-)	97198	51.9692	Klebsiella pneumoniae	Klebsiella pneumoniae (573)	Klebsiella (570)	Enterobacteriaceae (543)	Enterobacterales (91347)	Gammaproteobacteria (1236)	Proteobacteria (1224)	Bacteria (2)	5.65089	7.24048
NC_021622.1	0.0937829	0	75	452	circular	2013-06-27								IncN_1, AY046276,	IncN MLST(7):repN(3);traJ(4);korA(2)	56171	51.8631	Klebsiella pneumoniae	Klebsiella pneumoniae (573)	Klebsiella (570)	Enterobacteriaceae (543)	Enterobacterales (91347)	Gammaproteobacteria (1236)	Proteobacteria (1224)	Bacteria (2)	3.23005	5.22128
NZ_CP024876.1	0.0937829	0	75	453	circular	2018-04-11	Thailand		18	100	sputum	Homo sapiens		IncFII(K)_1, CP000648, |IncQ1_1, M28829,	IncF RST(K2:A-:B-):FIA(-);FIB(-);FIC(-);FII(-);FIIK(2);FIIS(-);FIIY(-)	129299	53.4567	Klebsiella pneumoniae	Klebsiella pneumoniae (573)	Klebsiella (570)	Enterobacteriaceae (543)	Enterobacterales (91347)	Gammaproteobacteria (1236)	Proteobacteria (1224)	Bacteria (2)	6.23426	6.83772
CP053703.1	0.0937829	0	75	454	circular	2020-05-22	India: Vellore		12.4098	78.8297	blood	Homo sapiens		IncN_1, AY046276,	IncN MLST(-):repN(2);traJ(-);korA(2?)	55277	51.7376	Salmonella enterica subsp. enterica serovar Typhi	Salmonella enterica (28901)	Salmonella (590)	Enterobacteriaceae (543)	Enterobacterales (91347)	Gammaproteobacteria (1236)	Proteobacteria (1224)	Bacteria (2)	3.43139	5.24079
NZ_CP044204.1	0.0937829	0	75	455	circular	2019-10-07	missing				missing	missing		IncR_1, DQ449578,		60896	54.731	Salmonella enterica subsp. enterica serovar Senftenberg	Salmonella enterica (28901)	Salmonella (590)	Enterobacteriaceae (543)	Enterobacterales (91347)	Gammaproteobacteria (1236)	Proteobacteria (1224)	Bacteria (2)	4.28864	4.76106
NZ_MK878892.1	0.0937829	0	75	456	circular	2020-06-15								IncFII_1, AY458016, |IncN_1, AY046276,	IncF RST(F2:A-:B-):FIA(-);FIB(-);FIC(-);FII(2);FIIK(-);FIIS(-);FIIY(-)|IncN MLST(5):repN(2);traJ(3);korA(2)	134435	52.3941	Escherichia coli	Escherichia coli (562)	Escherichia (561)	Enterobacteriaceae (543)	Enterobacterales (91347)	Gammaproteobacteria (1236)	Proteobacteria (1224)	Bacteria (2)	0.63487	5.84473
NZ_CP012428.1	0.0937829	0	75	457	circular	2016-10-30	Singapore		1.2951	103.783	hospital	Homo sapiens		IncFIB(pECLA)_1, CP001919,	IncF RST(F-:A-:B-):FIA(-);FIB(-);FIC(-);FII(-);FIIK(-);FIIS(-);FIIY(-)	54744	48.8583	Klebsiella pneumoniae	Klebsiella pneumoniae (573)	Klebsiella (570)	Enterobacteriaceae (543)	Enterobacterales (91347)	Gammaproteobacteria (1236)	Proteobacteria (1224)	Bacteria (2)	4.4927	4.60959
NZ_KM660724.1	0.0937829	0	75	458	circular	2020-06-03								ColKP3_1, JN205800, |IncN_1, AY046276,	IncN MLST(7):repN(3);traJ(4);korA(2)	57797	51.0822	Morganella morganii	Morganella morganii (582)	Morganella (581)	Morganellaceae (1903414)	Enterobacterales (91347)	Gammaproteobacteria (1236)	Proteobacteria (1224)	Bacteria (2)	3.15484	5.19956
NZ_KU302801.1	0.0937829	0	75	459	circular	2020-06-03								IncC_1, JN157804, |IncR_1, DQ449578,		130573	52.396	Enterobacter cloacae	Enterobacter cloacae (550)	Enterobacter (547)	Enterobacteriaceae (543)	Enterobacterales (91347)	Gammaproteobacteria (1236)	Proteobacteria (1224)	Bacteria (2)	1.77139	10.2709
NZ_KU302802.1	0.0937829	0	75	460	circular	2020-06-03								IncC_1, JN157804, |IncR_1, DQ449578,		132232	52.3096	Enterobacter cloacae	Enterobacter cloacae (550)	Enterobacter (547)	Enterobacteriaceae (543)	Enterobacterales (91347)	Gammaproteobacteria (1236)	Proteobacteria (1224)	Bacteria (2)	1.78021	10.2897
NZ_MN823996.1	0.0937829	0	75	461	circular	2020-08-04								IncFII(K)_1, CP000648,	IncF RST(K2:A-:B-):FIA(-);FIB(-);FIC(-);FII(-);FIIK(2);FIIS(-);FIIY(-)	64782	52.5933	Klebsiella pneumoniae	Klebsiella pneumoniae (573)	Klebsiella (570)	Enterobacteriaceae (543)	Enterobacterales (91347)	Gammaproteobacteria (1236)	Proteobacteria (1224)	Bacteria (2)	6.30424	6.79151
NZ_MF072962.1	0.0943778	0	74	462	circular	2020-06-03								IncN_1, AY046276,	IncN MLST(7):repN(3);traJ(4);korA(2)	51104	50.4325	Citrobacter freundii	Citrobacter freundii (546)	Citrobacter (544)	Enterobacteriaceae (543)	Enterobacterales (91347)	Gammaproteobacteria (1236)	Proteobacteria (1224)	Bacteria (2)	3.26481	5.24504
NZ_CP050069.1	0.0943778	0	74	463	circular	2020-03-23	Switzerland	Switzerland	46.7986	8.23197	water		cell culture	IncY_1, K02380, |IncR_1, DQ449578,		88962	54.4064	Klebsiella aerogenes	Klebsiella aerogenes (548)	Klebsiella (570)	Enterobacteriaceae (543)	Enterobacterales (91347)	Gammaproteobacteria (1236)	Proteobacteria (1224)	Bacteria (2)	4.48336	5.17914
NZ_CP061352.1	0.0943778	0	74	464	circular	2020-09-27	Singapore		1.3213	103.846	Stool/Rectal Swab	Homo sapiens		IncFII(K)_1, CP000648,	IncF RST(K7:A-:B-):FIA(-);FIB(-);FIC(-);FII(-);FIIK(7);FIIS(-);FIIY(-)	108694	52.8226	Klebsiella pneumoniae	Klebsiella pneumoniae (573)	Klebsiella (570)	Enterobacteriaceae (543)	Enterobacterales (91347)	Gammaproteobacteria (1236)	Proteobacteria (1224)	Bacteria (2)	6.06007	6.57257
NZ_MH909328.1	0.0943778	0	74	465	circular	2020-06-03								IncN_1, AY046276,	IncN MLST(-):repN(3);traJ(4?);korA(2)	50480	50.4279	Klebsiella pneumoniae	Klebsiella pneumoniae (573)	Klebsiella (570)	Enterobacteriaceae (543)	Enterobacterales (91347)	Gammaproteobacteria (1236)	Proteobacteria (1224)	Bacteria (2)	3.24607	5.2114
NZ_MH909336.1	0.0943778	0	74	466	circular	2020-06-03								IncN_1, AY046276,	IncN MLST(7):repN(3);traJ(4);korA(2)	50717	50.4742	Klebsiella pneumoniae	Klebsiella pneumoniae (573)	Klebsiella (570)	Enterobacteriaceae (543)	Enterobacterales (91347)	Gammaproteobacteria (1236)	Proteobacteria (1224)	Bacteria (2)	3.25491	5.23646
NZ_MH909337.1	0.0943778	0	74	467	circular	2020-06-03								IncN_1, AY046276,	IncN MLST(7):repN(3);traJ(4);korA(2)	51637	50.5529	Klebsiella pneumoniae	Klebsiella pneumoniae (573)	Klebsiella (570)	Enterobacteriaceae (543)	Enterobacterales (91347)	Gammaproteobacteria (1236)	Proteobacteria (1224)	Bacteria (2)	3.23331	5.19925
NZ_MH909339.1	0.0943778	0	74	468	circular	2020-06-03								IncN_1, AY046276,	IncN MLST(7):repN(3);traJ(4);korA(2)	51393	50.4913	Klebsiella pneumoniae	Klebsiella pneumoniae (573)	Klebsiella (570)	Enterobacteriaceae (543)	Enterobacterales (91347)	Gammaproteobacteria (1236)	Proteobacteria (1224)	Bacteria (2)	3.24976	5.23189
NZ_CP038456.1	0.0943778	0	74	469	linear	2019-05-08	Japan: Tokyo	Japan,Tokyo	34.6969	139.405		Homosapiens	Sputum	IncY_1, K02380,		67794	52.7598	Escherichia coli	Escherichia coli (562)	Escherichia (561)	Enterobacteriaceae (543)	Enterobacterales (91347)	Gammaproteobacteria (1236)	Proteobacteria (1224)	Bacteria (2)	4.58778	5.12027
NZ_CP038454.1	0.0943778	0	74	470	circular	2019-05-08	Japan: Tokyo	Japan,Tokyo	34.6969	139.405		Homosapiens	Sputum	IncHI2A_1, BX664015, |IncHI2_1, BX664015,	IncHI2 DLST(-):smr0018(3);smr0199(-)	211718	47.0919	Escherichia coli	Escherichia coli (562)	Escherichia (561)	Enterobacteriaceae (543)	Enterobacterales (91347)	Gammaproteobacteria (1236)	Proteobacteria (1224)	Bacteria (2)	-2.88925	14.7516
NZ_CP017056.1	0.0943778	0	74	471	circular	2016-12-17	USA: Maryland		39.2833	-76.6131	urine	Homo sapiens		IncX8_1, AM942760,		38206	39.9047	Providencia stuartii	Providencia stuartii (588)	Providencia (586)	Morganellaceae (1903414)	Enterobacterales (91347)	Gammaproteobacteria (1236)	Proteobacteria (1224)	Bacteria (2)	5.00234	5.91054
NZ_CP059714.1	0.0943778	0	74	472	circular	2020-08-12	China: Hangzhou		30.3	120.2	blood	Homo sapiens		IncN_1, AY046276,	IncN MLST(7):repN(3);traJ(4);korA(2)	52787	51.0391	Enterobacter hormaechei	Enterobacter hormaechei (158836)	Enterobacter (547)	Enterobacteriaceae (543)	Enterobacterales (91347)	Gammaproteobacteria (1236)	Proteobacteria (1224)	Bacteria (2)	3.24472	5.23148
NZ_MN891683.1	0.0943778	0	74	473	circular	2020-08-04								IncFII(K)_1, CP000648,	IncF RST(K2:A-:B-):FIA(-);FIB(-);FIC(-);FII(-);FIIK(2);FIIS(-);FIIY(-)	119921	52.8248	Klebsiella pneumoniae	Klebsiella pneumoniae (573)	Klebsiella (570)	Enterobacteriaceae (543)	Enterobacterales (91347)	Gammaproteobacteria (1236)	Proteobacteria (1224)	Bacteria (2)	6.19291	6.64893
NC_021198.1	0.0943778	0	74	474	circular	2013-05-13								IncFIB(K)_1, JN233704, |IncFII(pKPX1)_1, AP012055,	IncF RST(F-:A-:B-):FIA(-);FIB(-);FIC(-);FII(-);FIIK(-);FIIS(-);FIIY(-)	250444	53.4207	Klebsiella pneumoniae subsp. pneumoniae KPX	Klebsiella pneumoniae (573)	Klebsiella (570)	Enterobacteriaceae (543)	Enterobacterales (91347)	Gammaproteobacteria (1236)	Proteobacteria (1224)	Bacteria (2)	16.4615	1.96772
NZ_CP026389.1	0.0943778	0	74	475	circular	2018-02-24	USA		38.9847	-77.0947				IncN_1, AY046276,	IncN MLST(6):repN(2);traJ(4);korA(2)	50333	52.1725	Leclercia sp. LSNIH3	Leclercia sp. LSNIH3 (1920116)	Leclercia (83654)	Enterobacteriaceae (543)	Enterobacterales (91347)	Gammaproteobacteria (1236)	Proteobacteria (1224)	Bacteria (2)	3.42499	5.40214
NZ_CP008901.1	0.0943778	0	74	476	circular	2015-01-21	USA	USA	39.7837	-100.446	tracheal aspirate		missing	IncN_1, AY046276,	IncN MLST(6):repN(2);traJ(4);korA(2)	50333	52.1725	Enterobacter hormaechei subsp. hoffmannii ECNIH3	Enterobacter hormaechei (158836)	Enterobacter (547)	Enterobacteriaceae (543)	Enterobacterales (91347)	Gammaproteobacteria (1236)	Proteobacteria (1224)	Bacteria (2)	3.43175	5.41393
NZ_CP017086.1	0.0943778	0	74	477	circular	2017-09-20	China: Zhejiang		30.2568	120.202	urine	Homo sapiens		IncN_1, AY046276, |IncFII(pHN7A8)_1, JN232517, |ColpVC_1, JX133088,	IncN MLST(-):repN(3);traJ(-);korA(-)|IncF RST(F33:A-:B-):FIA(-);FIB(-);FIC(5?);FII(33);FIIK(-);FIIS(-);FIIY(-)	59035	53.7156	Proteus mirabilis	Proteus mirabilis (584)	Proteus (583)	Morganellaceae (1903414)	Enterobacterales (91347)	Gammaproteobacteria (1236)	Proteobacteria (1224)	Bacteria (2)	5.59987	3.03679
NZ_CP047338.1	0.0943778	0	74	478	circular	2020-03-04	China: Sichuan province		30.41	104.11	a feces sample of chicken origin			IncR_1, DQ449578,		50845	54.5914	Klebsiella pneumoniae	Klebsiella pneumoniae (573)	Klebsiella (570)	Enterobacteriaceae (543)	Enterobacterales (91347)	Gammaproteobacteria (1236)	Proteobacteria (1224)	Bacteria (2)	4.46917	5.0491
NZ_CP026179.1	0.0943778	0	74	479	circular	2018-01-31	USA		38.9847	-77.0947				IncN_1, AY046276, |IncFII(K)_1, CP000648, |IncFIA(HI1)_1, AF250878,	IncN MLST(-):repN(2);traJ(4);korA(-)|IncF RST(K3:A-:B-):FIA(~21);FIB(-);FIC(-);FII(-);FIIK(3);FIIS(-);FIIY(-)	237571	51.4112	Klebsiella pneumoniae	Klebsiella pneumoniae (573)	Klebsiella (570)	Enterobacteriaceae (543)	Enterobacterales (91347)	Gammaproteobacteria (1236)	Proteobacteria (1224)	Bacteria (2)	5.68028	7.24337
CP053105.1	0.0943778	0	74	480	circular	2020-10-26	Brazil: Sao Paulo	Brazil,Sao Paulo	-21.955	-49.0232	Transtracheal aspirate	Homo sapiens	Pure culture one microbial species	IncC_1, JN157804,		77651	53.5421	Enterobacter hormaechei subsp. xiangfangensis	Enterobacter hormaechei (158836)	Enterobacter (547)	Enterobacteriaceae (543)	Enterobacterales (91347)	Gammaproteobacteria (1236)	Proteobacteria (1224)	Bacteria (2)	1.35249	8.98583
NZ_MT559998.1	0.0943778	0	74	481	circular	2020-08-04								IncC_1, JN157804,		180389	52.5891	Citrobacter freundii	Citrobacter freundii (546)	Citrobacter (544)	Enterobacteriaceae (543)	Enterobacterales (91347)	Gammaproteobacteria (1236)	Proteobacteria (1224)	Bacteria (2)	1.37058	9.56297
KU160531.1	0.0943778	0	74	482	circular	2016-03-01								IncC_1, JN157804,		175254	52.2716	Vibrio alginolyticus	Vibrio alginolyticus (663)	Vibrio (662)	Vibrionaceae (641)	Vibrionales (135623)	Gammaproteobacteria (1236)	Proteobacteria (1224)	Bacteria (2)	1.34772	9.53014
NC_007682.3	0.0943778	0	74	483	circular	2006-01-06								IncN_1, AY046276,	IncN MLST(1):repN(1);traJ(1);korA(1)	56634	49.4261	Escherichia coli	Escherichia coli (562)	Escherichia (561)	Enterobacteriaceae (543)	Enterobacterales (91347)	Gammaproteobacteria (1236)	Proteobacteria (1224)	Bacteria (2)	3.7619	4.90147
NZ_CP064181.1	0.0943778	0	74	484	circular	2020-11-11	China	China	34.4118	86.0327		Homo sapiens	Cell culture	IncN_1, AY046276,	IncN MLST(7):repN(3);traJ(4);korA(2)	52790	51.057	Citrobacter amalonaticus	Citrobacter amalonaticus (35703)	Citrobacter (544)	Enterobacteriaceae (543)	Enterobacterales (91347)	Gammaproteobacteria (1236)	Proteobacteria (1224)	Bacteria (2)	3.26125	5.22807
NZ_CP020843.1	0.0943778	0	74	485	circular	2017-05-25	USA: Houston		29.7107	-95.4006	respiratory	Homo sapiens		IncFII(K)_1, CP000648,	IncF RST(K7:A-:B-):FIA(-);FIB(-);FIC(-);FII(-);FIIK(7);FIIS(-);FIIY(-)	97202	51.9567	Klebsiella pneumoniae	Klebsiella pneumoniae (573)	Klebsiella (570)	Enterobacteriaceae (543)	Enterobacterales (91347)	Gammaproteobacteria (1236)	Proteobacteria (1224)	Bacteria (2)	6.11115	6.61005
NZ_LC549807.1	0.0943778	0	74	486	circular	2020-08-04	Viet Nam:Ho Chi Minh		11	107		Homo sapiens		IncFIB(K)(pCAV1099-114)_1, CP011596, |IncHI1B(pNDM-MAR)_1, JN420336, |IncFII(K)_1, CP000648,	IncF RST(K2:A-:B-):FIA(-);FIB(-);FIC(-);FII(-);FIIK(2);FIIS(-);FIIY(-)|IncHI1 MLST(-):HCM1_043(-);HCM1_064(-);HCM1_099(-);HCM1_116(-);HCM1_178ac(-);HCM1_259(-);(-)	298683	51.0454	Klebsiella pneumoniae	Klebsiella pneumoniae (573)	Klebsiella (570)	Enterobacteriaceae (543)	Enterobacterales (91347)	Gammaproteobacteria (1236)	Proteobacteria (1224)	Bacteria (2)	5.32744	7.89478
CP009867.1	0.0943778	0	74	487	circular	2014-11-17	USA	USA	39.7837	-100.446	hand rail		missing	IncN_1, AY046276,	IncN MLST(6):repN(2);traJ(4);korA(2)	54000	52.4352	Pantoea sp. PSNIH2	Pantoea sp. PSNIH2 (1484157)	Pantoea (53335)	Erwiniaceae (1903409)	Enterobacterales (91347)	Gammaproteobacteria (1236)	Proteobacteria (1224)	Bacteria (2)	3.44215	5.4532
NZ_CP006642.1	0.0943778	0	74	488	circular	2015-06-22								IncFIB(K)_1, JN233704, |IncN_1, AY046276, |IncX1_1, EU370913,	IncF RST(F-:A-:B-):FIA(-);FIB(-);FIC(-);FII(-);FIIK(-);FIIS(-);FIIY(-)|IncN MLST(-):repN(1);traJ(-);korA(-)	145722	51.0184	Escherichia coli PCN061	Escherichia coli (562)	Escherichia (561)	Enterobacteriaceae (543)	Enterobacterales (91347)	Gammaproteobacteria (1236)	Proteobacteria (1224)	Bacteria (2)	4.11616	6.03257
NZ_CP046001.1	0.0943778	0	74	489	circular	2019-11-20	China:Henan	China,Henan	34	114	feces	swine	mixed culture	IncFIA(HI1)_1, AF250878, |IncFIB(K)_1, JN233704, |IncX1_1, EU370913,	IncF RST(F-:A18:B-):FIA(18);FIB(-);FIC(-);FII(-);FIIK(-);FIIS(-);FIIY(-)	73506	50.2802	Escherichia coli	Escherichia coli (562)	Escherichia (561)	Enterobacteriaceae (543)	Enterobacterales (91347)	Gammaproteobacteria (1236)	Proteobacteria (1224)	Bacteria (2)	4.9411	5.107
NZ_CP009881.1	0.0943778	0	74	490	circular	2015-01-21	USA	USA	39.7837	-100.446	shelf		missing	IncN_1, AY046276,	IncN MLST(6):repN(2);traJ(4);korA(2)	50272	52.1682	Pantoea sp. PSNIH1	Pantoea sp. PSNIH1 (1484158)	Pantoea (53335)	Erwiniaceae (1903409)	Enterobacterales (91347)	Gammaproteobacteria (1236)	Proteobacteria (1224)	Bacteria (2)	3.45575	5.39348
AP022439.1	0.0943778	0	74	491	circular	2020-10-09	Japan:Tokyo	Japan,Tokyo	34.6969	139.405				IncR_1, DQ449578, |IncFII(Y)_1, CP001049,	IncF RST(F-:A-:B-):FIA(-);FIB(-);FIC(-);FII(-);FIIK(-);FIIS(-);FIIY(-)	254388	54.4617	Raoultella planticola	Raoultella planticola (575)	Raoultella (160674)	Enterobacteriaceae (543)	Enterobacterales (91347)	Gammaproteobacteria (1236)	Proteobacteria (1224)	Bacteria (2)	5.59522	6.57693
NZ_CP026277.1	0.0943778	0	74	492	circular	2018-02-01	USA		38.9847	-77.0947				IncN_1, AY046276,	IncN MLST(6):repN(2);traJ(4);korA(2)	56561	53.3866	Klebsiella oxytoca	Klebsiella oxytoca (571)	Klebsiella (570)	Enterobacteriaceae (543)	Enterobacterales (91347)	Gammaproteobacteria (1236)	Proteobacteria (1224)	Bacteria (2)	3.45176	5.4288
NZ_KM977631.1	0.0943778	0	74	493	circular	2020-06-03								IncN_1, AY046276,	IncN MLST(7):repN(3);traJ(4);korA(2)	50742	50.5262	Klebsiella pneumoniae	Klebsiella pneumoniae (573)	Klebsiella (570)	Enterobacteriaceae (543)	Enterobacterales (91347)	Gammaproteobacteria (1236)	Proteobacteria (1224)	Bacteria (2)	3.23939	5.22423
NZ_KT982614.1	0.0943778	0	74	494	circular	2020-06-03								IncN_1, AY046276,	IncN MLST(7):repN(3);traJ(4);korA(2)	54449	50.6015	Escherichia coli	Escherichia coli (562)	Escherichia (561)	Enterobacteriaceae (543)	Enterobacterales (91347)	Gammaproteobacteria (1236)	Proteobacteria (1224)	Bacteria (2)	3.2226	5.24535
NZ_KT982616.1	0.0943778	0	74	495	circular	2020-06-03								IncN_1, AY046276,	IncN MLST(7):repN(3);traJ(4);korA(2)	54449	50.5794	Escherichia coli	Escherichia coli (562)	Escherichia (561)	Enterobacteriaceae (543)	Enterobacterales (91347)	Gammaproteobacteria (1236)	Proteobacteria (1224)	Bacteria (2)	3.26685	5.24788
NZ_KU051709.1	0.0943778	0	74	496	circular	2020-06-03								IncN_1, AY046276,	IncN MLST(7):repN(3);traJ(4);korA(2)	51600	50.5601	Escherichia coli	Escherichia coli (562)	Escherichia (561)	Enterobacteriaceae (543)	Enterobacterales (91347)	Gammaproteobacteria (1236)	Proteobacteria (1224)	Bacteria (2)	3.25639	5.23213
NZ_KU051708.1	0.0943778	0	74	497	circular	2020-06-03								IncN_1, AY046276,	IncN MLST(7):repN(3);traJ(4);korA(2)	51469	50.578	Klebsiella pneumoniae	Klebsiella pneumoniae (573)	Klebsiella (570)	Enterobacteriaceae (543)	Enterobacterales (91347)	Gammaproteobacteria (1236)	Proteobacteria (1224)	Bacteria (2)	3.26797	5.23521
NZ_KU886034.1	0.0943778	0	74	498	circular	2016-12-08								IncN_1, AY046276,	IncN MLST(7):repN(3);traJ(4);korA(2)	51599	50.5456	Klebsiella pneumoniae	Klebsiella pneumoniae (573)	Klebsiella (570)	Enterobacteriaceae (543)	Enterobacterales (91347)	Gammaproteobacteria (1236)	Proteobacteria (1224)	Bacteria (2)	3.21877	5.22105
NZ_KX711879.1	0.0943778	0	74	499	circular	2020-06-03								IncN_1, AY046276,	IncN MLST(19):repN(3);traJ(11);korA(2)	51207	50.495	Pseudomonas aeruginosa	Pseudomonas aeruginosa (287)	Pseudomonas (286)	Pseudomonadaceae (135621)	Pseudomonadales (72274)	Gammaproteobacteria (1236)	Proteobacteria (1224)	Bacteria (2)	3.25637	5.23663
NZ_KT989598.1	0.0943778	0	74	500	circular	2020-06-03								IncN_1, AY046276,	IncN MLST(7):repN(3);traJ(4);korA(2)	54669	50.6283	Enterobacter cloacae	Enterobacter cloacae (550)	Enterobacter (547)	Enterobacteriaceae (543)	Enterobacterales (91347)	Gammaproteobacteria (1236)	Proteobacteria (1224)	Bacteria (2)	3.26897	5.22797
NZ_KU862632.1	0.0943778	0	74	501	circular	2020-06-03								IncN_1, AY046276,	IncN MLST(7):repN(3);traJ(4);korA(2)	51591	50.534	Klebsiella pneumoniae	Klebsiella pneumoniae (573)	Klebsiella (570)	Enterobacteriaceae (543)	Enterobacterales (91347)	Gammaproteobacteria (1236)	Proteobacteria (1224)	Bacteria (2)	3.22957	5.21206
NZ_KT982613.1	0.0943778	0	74	502	circular	2020-06-03								IncN_1, AY046276,	IncN MLST(7):repN(3);traJ(4);korA(2)	50979	50.5286	Klebsiella pneumoniae	Klebsiella pneumoniae (573)	Klebsiella (570)	Enterobacteriaceae (543)	Enterobacterales (91347)	Gammaproteobacteria (1236)	Proteobacteria (1224)	Bacteria (2)	3.26701	5.23542
NZ_KU051707.1	0.0943778	0	74	503	circular	2020-06-03								IncN_1, AY046276,	IncN MLST(7):repN(3);traJ(4);korA(2)	51362	50.5763	Escherichia coli	Escherichia coli (562)	Escherichia (561)	Enterobacteriaceae (543)	Enterobacterales (91347)	Gammaproteobacteria (1236)	Proteobacteria (1224)	Bacteria (2)	3.26979	5.23862
NZ_KT982618.1	0.0943778	0	74	504	circular	2020-06-03								IncN_1, AY046276,	IncN MLST(7):repN(3);traJ(4);korA(2)	51589	50.5554	Escherichia coli	Escherichia coli (562)	Escherichia (561)	Enterobacteriaceae (543)	Enterobacterales (91347)	Gammaproteobacteria (1236)	Proteobacteria (1224)	Bacteria (2)	3.2505	5.23045
NZ_KT982615.1	0.0943778	0	74	505	circular	2020-06-03								IncN_1, AY046276,	IncN MLST(7):repN(3);traJ(4);korA(2)	54449	50.5923	Escherichia coli	Escherichia coli (562)	Escherichia (561)	Enterobacteriaceae (543)	Enterobacterales (91347)	Gammaproteobacteria (1236)	Proteobacteria (1224)	Bacteria (2)	3.25428	5.23571
CP064297.1	0.0949813	0	73	506	circular	2020-11-15	Colombia: Bogota		4.696	-74.035	Ascites fluid	Homo sapiens		ColRNAI_1, DQ298019, |IncFII(K)_1, CP000648,	IncF RST(K7:A-:B-):FIA(-);FIB(-);FIC(-);FII(-);FIIK(7);FIIS(-);FIIY(-)	132884	52.8047	Klebsiella pneumoniae	Klebsiella pneumoniae (573)	Klebsiella (570)	Enterobacteriaceae (543)	Enterobacterales (91347)	Gammaproteobacteria (1236)	Proteobacteria (1224)	Bacteria (2)	6.03408	6.63364
NZ_KY128483.1	0.0949813	0	73	507	circular	2020-06-03								IncN_1, AY046276,	IncN MLST(6):repN(2);traJ(4);korA(2)	68763	53.1318	Klebsiella oxytoca	Klebsiella oxytoca (571)	Klebsiella (570)	Enterobacteriaceae (543)	Enterobacterales (91347)	Gammaproteobacteria (1236)	Proteobacteria (1224)	Bacteria (2)	3.48983	5.58073
NZ_MH909349.1	0.0949813	0	73	508	circular	2020-06-03								IncFII_1, AY458016, |IncFII(pSE11)_1, AP009242, |IncR_1, DQ449578,	IncF RST(F2:A-:B-):FIA(-);FIB(-);FIC(-);FII(2);FIIK(-);FIIS(-);FIIY(-)	219007	53.3362	Klebsiella pneumoniae	Klebsiella pneumoniae (573)	Klebsiella (570)	Enterobacteriaceae (543)	Enterobacterales (91347)	Gammaproteobacteria (1236)	Proteobacteria (1224)	Bacteria (2)	0.684224	6.18984
NZ_MK036890.1	0.0949813	0	73	509	circular	2020-06-03								IncN_1, AY046276,	IncN MLST(7):repN(3);traJ(4);korA(2)	56047	50.0455	Klebsiella pneumoniae	Klebsiella pneumoniae (573)	Klebsiella (570)	Enterobacteriaceae (543)	Enterobacterales (91347)	Gammaproteobacteria (1236)	Proteobacteria (1224)	Bacteria (2)	3.23899	5.22908
NZ_MH909334.1	0.0949813	0	73	510	circular	2020-06-03								IncN_1, AY046276,	IncN MLST(7):repN(3);traJ(4);korA(2)	53619	50.9316	Klebsiella pneumoniae	Klebsiella pneumoniae (573)	Klebsiella (570)	Enterobacteriaceae (543)	Enterobacterales (91347)	Gammaproteobacteria (1236)	Proteobacteria (1224)	Bacteria (2)	3.27694	5.24316
NZ_CP021734.1	0.0949813	0	73	511	circular	2017-06-15	missing				missing	missing		IncY_1, K02380, |IncN_1, AY046276,	IncN MLST(-):repN(2);traJ(-);korA(2)	85195	53.7379	Escherichia coli	Escherichia coli (562)	Escherichia (561)	Enterobacteriaceae (543)	Enterobacterales (91347)	Gammaproteobacteria (1236)	Proteobacteria (1224)	Bacteria (2)	3.52144	5.51494
NZ_CP025710.1	0.0949813	0	73	512	circular	2018-03-16	USA: Pennsylvania		41.2033	-77.1945	missing	Homo sapiens		IncN_1, AY046276,	IncN MLST(6):repN(2);traJ(4);korA(2)	70372	53.3394	Escherichia coli	Escherichia coli (562)	Escherichia (561)	Enterobacteriaceae (543)	Enterobacterales (91347)	Gammaproteobacteria (1236)	Proteobacteria (1224)	Bacteria (2)	3.49284	5.57645
NZ_CP045022.1	0.0949813	0	73	513	circular	2019-10-17	not applicable				not applicable	Homo sapiens		IncN_1, AY046276,	IncN MLST(6):repN(2);traJ(4);korA(2)	50635	52.995	Klebsiella pneumoniae subsp. pneumoniae	Klebsiella pneumoniae (573)	Klebsiella (570)	Enterobacteriaceae (543)	Enterobacterales (91347)	Gammaproteobacteria (1236)	Proteobacteria (1224)	Bacteria (2)	3.43851	5.49642
NZ_CP050174.1	0.0949813	0	73	514	circular	2020-03-27	China: Jiangsu		31.45	119.18	feces	pig		IncFIB(K)_1, JN233704, |IncFIA(HI1)_1, AF250878, |IncX1_1, EU370913,	IncF RST(F-:A18:B-):FIA(18);FIB(-);FIC(-);FII(-);FIIK(-);FIIS(-);FIIY(-)	97366	50.1828	Escherichia coli	Escherichia coli (562)	Escherichia (561)	Enterobacteriaceae (543)	Enterobacterales (91347)	Gammaproteobacteria (1236)	Proteobacteria (1224)	Bacteria (2)	4.91584	5.07497
NZ_MT219820.1	0.0949813	0	73	515	circular	2020-08-04								IncFIB(K)_1, JN233704, |IncFIA(HI1)_1, AF250878, |IncX1_1, EU370913,	IncF RST(F-:A18:B-):FIA(18);FIB(-);FIC(-);FII(-);FIIK(-);FIIS(-);FIIY(-)	97526	50.2205	Escherichia coli	Escherichia coli (562)	Escherichia (561)	Enterobacteriaceae (543)	Enterobacterales (91347)	Gammaproteobacteria (1236)	Proteobacteria (1224)	Bacteria (2)	4.98033	5.07126
NC_019091.1	0.0949813	0	73	516	circular	2012-11-02								Col156_1, NC_009781, |IncQ1_1, M28829,		27072	56.6674	Escherichia coli	Escherichia coli (562)	Escherichia (561)	Enterobacteriaceae (543)	Enterobacterales (91347)	Gammaproteobacteria (1236)	Proteobacteria (1224)	Bacteria (2)	4.16075	4.36865
NZ_CP032203.1	0.0949813	0	73	517	circular	2018-09-19	missing				missing	missing		IncN_1, AY046276,	IncN MLST(9):repN(5);traJ(6);korA(3)	41865	51.1406	Escherichia coli	Escherichia coli (562)	Escherichia (561)	Enterobacteriaceae (543)	Enterobacterales (91347)	Gammaproteobacteria (1236)	Proteobacteria (1224)	Bacteria (2)	3.44521	5.44059
NZ_CP027855.1	0.0949813	0	73	518	circular	2018-03-29	USA:Mississippi	USA,Mississippi	32.9716	-89.7348	catfish		whole organism	IncP6_1, JF785550,		18970	62.4354	Plesiomonas shigelloides	Plesiomonas shigelloides (703)	Plesiomonas (702)		Enterobacterales (91347)	Gammaproteobacteria (1236)	Proteobacteria (1224)	Bacteria (2)	5.21961	4.38015
NC_021238.1	0.0949813	0	73	519	circular	2013-05-22								pKP1433_1, JX397875,		55417	50.8238	Klebsiella pneumoniae	Klebsiella pneumoniae (573)	Klebsiella (570)	Enterobacteriaceae (543)	Enterobacterales (91347)	Gammaproteobacteria (1236)	Proteobacteria (1224)	Bacteria (2)	3.4877	5.53489
NZ_MT219817.1	0.0949813	0	73	520	circular	2020-09-22								IncFIA(HI1)_1, AF250878, |IncFIB(K)_1, JN233704, |IncX1_1, EU370913,	IncF RST(F-:A18:B-):FIA(18);FIB(-);FIC(-);FII(-);FIIK(-);FIIS(-);FIIY(-)	101373	49.8397	Escherichia coli	Escherichia coli (562)	Escherichia (561)	Enterobacteriaceae (543)	Enterobacterales (91347)	Gammaproteobacteria (1236)	Proteobacteria (1224)	Bacteria (2)	4.9592	5.1409
NZ_CP045188.1	0.0949813	0	73	521	circular	2019-12-11	China: NanTong		32.01	120.86	pig manure			IncX1_1, EU370913, |IncFIB(K)_1, JN233704, |IncFIA(HI1)_1, AF250878,	IncF RST(F-:A18:B-):FIA(18);FIB(-);FIC(-);FII(-);FIIK(-);FIIS(-);FIIY(-)	115253	48.692	Escherichia coli	Escherichia coli (562)	Escherichia (561)	Enterobacteriaceae (543)	Enterobacterales (91347)	Gammaproteobacteria (1236)	Proteobacteria (1224)	Bacteria (2)	4.92667	5.09307
NZ_CP028486.1	0.0949813	0	73	522	circular	2018-06-08	China:Shanghai	China,Shanghai	31.2253	121.489		Homo sapiens	sputum	IncN_1, AY046276,	IncN MLST(7):repN(3);traJ(4);korA(2)	52864	51.0858	Escherichia coli	Escherichia coli (562)	Escherichia (561)	Enterobacteriaceae (543)	Enterobacterales (91347)	Gammaproteobacteria (1236)	Proteobacteria (1224)	Bacteria (2)	3.26833	5.23253
NZ_MK648236.1	0.0949813	0	73	523	circular	2020-08-04								IncR_1, DQ449578,		49984	52.0527	Klebsiella sp.	Klebsiella sp. (576)	Klebsiella (570)	Enterobacteriaceae (543)	Enterobacterales (91347)	Gammaproteobacteria (1236)	Proteobacteria (1224)	Bacteria (2)	4.45545	5.50051
NZ_AP022271.1	0.0949813	0	73	524	circular	2020-08-14	Japan:Tokyo		35.6316	139.746				IncFII(pCRY)_1, NC_005814,	IncF RST(F-:A-:B-):FIA(-);FIB(-);FIC(-);FII(-);FIIK(-);FIIS(-);FIIY(-)	86933	54.3223	Raoultella ornithinolytica	Raoultella ornithinolytica (54291)	Raoultella (160674)	Enterobacteriaceae (543)	Enterobacterales (91347)	Gammaproteobacteria (1236)	Proteobacteria (1224)	Bacteria (2)	1.52962	-3.83612
NZ_KY128484.1	0.0949813	0	73	525	circular	2020-06-03								IncN_1, AY046276,	IncN MLST(6):repN(2);traJ(4);korA(2)	69888	53.198	Klebsiella michiganensis	Klebsiella michiganensis (1134687)	Klebsiella (570)	Enterobacteriaceae (543)	Enterobacterales (91347)	Gammaproteobacteria (1236)	Proteobacteria (1224)	Bacteria (2)	3.49769	5.54768
NZ_KX960110.1	0.0949813	0	73	526	circular	2020-06-03								IncX3_1, JN247852, |IncY_1, K02380,		102517	51.1027	Escherichia coli	Escherichia coli (562)	Escherichia (561)	Enterobacteriaceae (543)	Enterobacterales (91347)	Gammaproteobacteria (1236)	Proteobacteria (1224)	Bacteria (2)	-17.7493	2.47008
NZ_CP034786.1	0.0949813	0	73	527	circular	2019-01-12	China:Zhejiang	China,Zhejiang	29	120	feces		cell culture	IncFIB(K)_1, JN233704,	IncF RST(F-:A-:B-):FIA(-);FIB(-);FIC(-);FII(-);FIIK(-);FIIS(-);FIIY(-)	143706	48.9527	Escherichia coli	Escherichia coli (562)	Escherichia (561)	Enterobacteriaceae (543)	Enterobacterales (91347)	Gammaproteobacteria (1236)	Proteobacteria (1224)	Bacteria (2)	-3.55347	-0.442779
CP052333.1	0.0955937	0	72	528	circular	2020-05-04	South Korea: Chungbuk		36.8	127.7	blood	Homo sapiens		IncR_1, DQ449578,		70182	50.919	Klebsiella pneumoniae	Klebsiella pneumoniae (573)	Klebsiella (570)	Enterobacteriaceae (543)	Enterobacterales (91347)	Gammaproteobacteria (1236)	Proteobacteria (1224)	Bacteria (2)	4.65771	5.24016
CP021899.1	0.0955937	0	72	529	circular	2017-06-20	missing				missing	missing		IncN_1, AY046276,	IncN MLST(6):repN(2);traJ(4);korA(2)	69635	54.2917	Enterobacter cloacae	Enterobacter cloacae (550)	Enterobacter (547)	Enterobacteriaceae (543)	Enterobacterales (91347)	Gammaproteobacteria (1236)	Proteobacteria (1224)	Bacteria (2)	3.49251	5.48878
NZ_MF344557.1	0.0955937	0	72	530	circular	2020-06-03								IncN_1, AY046276,	IncN MLST(7):repN(3);traJ(4);korA(2)	56893	50.3296	Klebsiella pneumoniae	Klebsiella pneumoniae (573)	Klebsiella (570)	Enterobacteriaceae (543)	Enterobacterales (91347)	Gammaproteobacteria (1236)	Proteobacteria (1224)	Bacteria (2)	3.26246	5.23498
NZ_KY271414.1	0.0955937	0	72	531	circular	2020-06-03								IncN_1, AY046276,	IncN MLST(15):repN(7);traJ(6);korA(3)	52848	50.6642	Klebsiella pneumoniae	Klebsiella pneumoniae (573)	Klebsiella (570)	Enterobacteriaceae (543)	Enterobacterales (91347)	Gammaproteobacteria (1236)	Proteobacteria (1224)	Bacteria (2)	3.46644	5.49186
NZ_MH401970.1	0.0955937	0	72	532	circular	2020-06-03								IncN_1, AY046276,	IncN MLST(7):repN(3);traJ(4);korA(2)	50392	51.6987	Enterobacter hormaechei subsp. steigerwaltii	Enterobacter hormaechei (158836)	Enterobacter (547)	Enterobacteriaceae (543)	Enterobacterales (91347)	Gammaproteobacteria (1236)	Proteobacteria (1224)	Bacteria (2)	3.276	5.243
NZ_MN218686.1	0.0955937	0	72	533	circular	2020-06-04								IncFIB(AP001918)_1, AP001918, |IncFIA_1, AP001918, |IncFII(pRSB107)_1, AJ851089,	IncF RST(F1:A-:B10):FIA(1,6);FIB(10);FIC(3?);FII(1);FIIK(-);FIIS(-);FIIY(-)	153866	52.0505	Escherichia coli	Escherichia coli (562)	Escherichia (561)	Enterobacteriaceae (543)	Enterobacterales (91347)	Gammaproteobacteria (1236)	Proteobacteria (1224)	Bacteria (2)	3.57088	-2.15647
NZ_MK862125.1	0.0955937	0	72	534	circular	2020-06-04								IncN_1, AY046276,	IncN MLST(6):repN(2);traJ(4);korA(2)	55076	52.4875	Enterobacter hormaechei	Enterobacter hormaechei (158836)	Enterobacter (547)	Enterobacteriaceae (543)	Enterobacterales (91347)	Gammaproteobacteria (1236)	Proteobacteria (1224)	Bacteria (2)	3.46505	5.45545
NZ_LT985275.1	0.0955937	0	72	535	circular	2018-03-15								IncFII(pHN7A8)_1, JN232517,	IncF RST(F6:A-:B-):FIA(-);FIB(-);FIC(-);FII(6);FIIK(-);FIIS(-);FIIY(-)	91487	54.0689	Escherichia coli	Escherichia coli (562)	Escherichia (561)	Enterobacteriaceae (543)	Enterobacterales (91347)	Gammaproteobacteria (1236)	Proteobacteria (1224)	Bacteria (2)	1.26304	6.45831
CP052366.1	0.0955937	0	72	536	circular	2020-05-04	South Korea: Chungbuk		36.8	127.7	blood	Homo sapiens		IncR_1, DQ449578,		71240	51.0991	Klebsiella pneumoniae	Klebsiella pneumoniae (573)	Klebsiella (570)	Enterobacteriaceae (543)	Enterobacterales (91347)	Gammaproteobacteria (1236)	Proteobacteria (1224)	Bacteria (2)	4.67236	5.20748
NZ_CP035198.1	0.0955937	0	72	537	circular	2019-10-31	Laos		19.52	102.1	stool	Homo sapiens		IncR_1, DQ449578,		46873	54.6882	Klebsiella pneumoniae	Klebsiella pneumoniae (573)	Klebsiella (570)	Enterobacteriaceae (543)	Enterobacterales (91347)	Gammaproteobacteria (1236)	Proteobacteria (1224)	Bacteria (2)	4.50332	5.03228
NZ_MT560001.1	0.0955937	0	72	538	circular	2020-08-04								IncC_1, JN157804,		193802	52.5542	Klebsiella pneumoniae	Klebsiella pneumoniae (573)	Klebsiella (570)	Enterobacteriaceae (543)	Enterobacterales (91347)	Gammaproteobacteria (1236)	Proteobacteria (1224)	Bacteria (2)	1.38883	9.58382
NZ_CP016013.1	0.0955937	0	72	539	circular	2016-12-18	USA: CA	USA,CA	36.7015	-118.756	almond kernel (raw, variety carmel)	missing		IncC_1, JN157804,		130039	51.7998	Salmonella enterica subsp. enterica serovar Newport	Salmonella enterica (28901)	Salmonella (590)	Enterobacteriaceae (543)	Enterobacterales (91347)	Gammaproteobacteria (1236)	Proteobacteria (1224)	Bacteria (2)	1.35218	9.24735
NZ_CP060283.1	0.0955937	0	72	540	circular	2020-08-28	Singapore		1.3213	103.846	Rectal Swab	Homo sapiens		IncFII(K)_1, CP000648,	IncF RST(K7:A-:B-):FIA(-);FIB(-);FIC(-);FII(-);FIIK(7);FIIS(-);FIIY(-)	111136	53.1529	Klebsiella pneumoniae	Klebsiella pneumoniae (573)	Klebsiella (570)	Enterobacteriaceae (543)	Enterobacterales (91347)	Gammaproteobacteria (1236)	Proteobacteria (1224)	Bacteria (2)	6.05064	6.57083
NZ_CP036447.1	0.0955937	0	72	541	circular	2019-02-26	USA		38.9847	-77.0947	missing	missing		IncR_1, DQ449578,		87465	53.8295	Klebsiella pneumoniae	Klebsiella pneumoniae (573)	Klebsiella (570)	Enterobacteriaceae (543)	Enterobacterales (91347)	Gammaproteobacteria (1236)	Proteobacteria (1224)	Bacteria (2)	4.44615	4.98066
CP052547.1	0.0955937	0	72	542	circular	2020-05-04	South Korea: Gyeonggi		37.66	126.77	blood	Homo sapiens		IncR_1, DQ449578,		67978	50.6693	Klebsiella pneumoniae	Klebsiella pneumoniae (573)	Klebsiella (570)	Enterobacteriaceae (543)	Enterobacterales (91347)	Gammaproteobacteria (1236)	Proteobacteria (1224)	Bacteria (2)	4.65805	5.20101
NZ_MN626601.1	0.0955937	0	72	543	circular	2020-11-04								IncFII(pHN7A8)_1, JN232517,	IncF RST(F6:A-:B-):FIA(-);FIB(-);FIC(-);FII(6);FIIK(-);FIIS(-);FIIY(-)	91490	54.0693	Escherichia coli	Escherichia coli (562)	Escherichia (561)	Enterobacteriaceae (543)	Enterobacterales (91347)	Gammaproteobacteria (1236)	Proteobacteria (1224)	Bacteria (2)	1.27866	6.46175
NZ_CP033947.1	0.0955937	0	72	544	circular	2018-11-30	Unknown				Unknown	Homo sapiens		IncFIB(pQil)_1, JN233705, |IncFII(K)_1, CP000648,	IncF RST(K2:A-:B-):FIA(-);FIB(-);FIC(-);FII(-);FIIK(2);FIIS(-);FIIY(-)	142764	52.3227	Klebsiella pneumoniae subsp. pneumoniae	Klebsiella pneumoniae (573)	Klebsiella (570)	Enterobacteriaceae (543)	Enterobacterales (91347)	Gammaproteobacteria (1236)	Proteobacteria (1224)	Bacteria (2)	6.08854	6.37117
NZ_KX023259.1	0.0955937	0	72	545	circular	2020-08-04								IncFIA(HI1)_1, AF250878, |IncFIB(K)_1, JN233704,	IncF RST(F-:A18:B-):FIA(18);FIB(-);FIC(-);FII(-);FIIK(-);FIIS(-);FIIY(-)	124259	51.5134	Escherichia coli	Escherichia coli (562)	Escherichia (561)	Enterobacteriaceae (543)	Enterobacterales (91347)	Gammaproteobacteria (1236)	Proteobacteria (1224)	Bacteria (2)	4.90396	5.08183
CP009853.1	0.0955937	0	72	546	circular	2014-11-17	USA	USA	39.7837	-100.446	sink drain		missing	IncN_1, AY046276,	IncN MLST(6):repN(2);traJ(4);korA(2)	56557	51.3659	Enterobacter cloacae	Enterobacter cloacae (550)	Enterobacter (547)	Enterobacteriaceae (543)	Enterobacterales (91347)	Gammaproteobacteria (1236)	Proteobacteria (1224)	Bacteria (2)	3.41969	5.40891
NZ_CP020527.1	0.0955937	0	72	547	circular	2019-08-25	USA:Boston	USA,Boston	42.3603	-71.0583	trachael aspirate	Homo sapiens		IncN_1, AY046276,	IncN MLST(6):repN(2);traJ(4);korA(2)	70906	54.3353	Enterobacter cloacae	Enterobacter cloacae (550)	Enterobacter (547)	Enterobacteriaceae (543)	Enterobacterales (91347)	Gammaproteobacteria (1236)	Proteobacteria (1224)	Bacteria (2)	3.49648	5.45876
NZ_CP021730.1	0.0955937	0	72	548	circular	2019-08-25	Hong Kong		22.28	114.14	urine	Homo sapiens		IncN_1, AY046276,	IncN MLST(-):repN(4);traJ(5,5);korA(1)	58890	51.3975	Escherichia coli	Escherichia coli (562)	Escherichia (561)	Enterobacteriaceae (543)	Enterobacterales (91347)	Gammaproteobacteria (1236)	Proteobacteria (1224)	Bacteria (2)	3.67998	4.88238
NC_009982.1	0.0955937	0	72	549	circular	2007-11-19								IncW_1, EF633507,		39924	56.8555	Salmonella enterica subsp. enterica serovar Dublin	Salmonella enterica (28901)	Salmonella (590)	Enterobacteriaceae (543)	Enterobacterales (91347)	Gammaproteobacteria (1236)	Proteobacteria (1224)	Bacteria (2)	3.78072	3.21294
NZ_CP029493.1	0.0955937	0	72	550	circular	2018-06-19	China: Shenzhen		22.62	114.07	fecal sample	Homo sapiens		p0111_1, AP010962, |IncFIB(K)_1, JN233704,	IncF RST(F-:A-:B-):FIA(-);FIB(-);FIC(-);FII(-);FIIK(-);FIIS(-);FIIY(-)	179444	49.9733	Escherichia coli	Escherichia coli (562)	Escherichia (561)	Enterobacteriaceae (543)	Enterobacterales (91347)	Gammaproteobacteria (1236)	Proteobacteria (1224)	Bacteria (2)	-3.53401	-0.444757
NZ_CP041286.1	0.0955937	0	72	551	circular	2020-04-16	China	China	34.4118	86.0327		cow	feces	IncFIB(K)_1, JN233704, |IncFIA(HI1)_1, AF250878, |IncX1_1, EU370913,	IncF RST(F-:A18:B-):FIA(18);FIB(-);FIC(-);FII(-);FIIK(-);FIIS(-);FIIY(-)	102347	49.8647	Escherichia coli	Escherichia coli (562)	Escherichia (561)	Enterobacteriaceae (543)	Enterobacterales (91347)	Gammaproteobacteria (1236)	Proteobacteria (1224)	Bacteria (2)	4.91968	5.10209
NZ_AP021971.1	0.0962153	0	71	552	circular	2020-08-13	Japan:Tokyo		35.6684	139.428				IncR_1, DQ449578,		39860	55.5845	Raoultella ornithinolytica	Raoultella ornithinolytica (54291)	Raoultella (160674)	Enterobacteriaceae (543)	Enterobacterales (91347)	Gammaproteobacteria (1236)	Proteobacteria (1224)	Bacteria (2)	4.37964	4.8698
NZ_MG702492.1	0.0962153	0	71	553	circular	2020-06-03								IncFIA_1, AP001918, |IncFII(pAMA1167-NDM-5)_1, CP024805, |IncQ1_1, M28829, |IncFIB(AP001918)_1, AP001918,	IncF RST(F1:A-:B49):FIA(1,6);FIB(49);FIC(-);FII(1);FIIK(-);FIIS(-);FIIY(-)	111890	51.6892	Escherichia coli	Escherichia coli (562)	Escherichia (561)	Enterobacteriaceae (543)	Enterobacterales (91347)	Gammaproteobacteria (1236)	Proteobacteria (1224)	Bacteria (2)	3.6954	-1.73433
NZ_MF788069.1	0.0962153	0	71	554	circular	2020-06-03								IncFII(Yp)_1, CP000670,	IncF RST(Y6:A-:B-):FIA(-);FIB(-);FIC(-);FII(-);FIIK(28?);FIIS(-);FIIY(6)	71286	54.9266	Raoultella ornithinolytica	Raoultella ornithinolytica (54291)	Raoultella (160674)	Enterobacteriaceae (543)	Enterobacterales (91347)	Gammaproteobacteria (1236)	Proteobacteria (1224)	Bacteria (2)	5.14158	6.53502
CP050286.1	0.0962153	0	71	555	circular	2020-03-29	China:Jiangxi,Nanchang		28.41	115.54	blood	Homo sapiens		IncR_1, DQ449578, |IncFII(pHN7A8)_1, JN232517,	IncF RST(F-:A-:B-):FIA(-);FIB(-);FIC(5?);FII(6?);FIIK(-);FIIS(-);FIIY(-)	103455	50.9913	Klebsiella pneumoniae	Klebsiella pneumoniae (573)	Klebsiella (570)	Enterobacteriaceae (543)	Enterobacterales (91347)	Gammaproteobacteria (1236)	Proteobacteria (1224)	Bacteria (2)	5.78813	3.08075
NZ_MK033499.1	0.0962153	0	71	556	circular	2020-06-03								IncC_1, JN157804,		125028	51.678	Escherichia coli	Escherichia coli (562)	Escherichia (561)	Enterobacteriaceae (543)	Enterobacterales (91347)	Gammaproteobacteria (1236)	Proteobacteria (1224)	Bacteria (2)	1.43875	8.84351
NZ_CP026590.1	0.0962153	0	71	557	circular	2018-03-01	China:Nanchang	China,Nanchang	28.6793	115.889		Homo sapiens	tissue sample	IncN_1, AY046276,	IncN MLST(-):repN(3);traJ(-);korA(2)	49215	52.7116	Klebsiella pneumoniae	Klebsiella pneumoniae (573)	Klebsiella (570)	Enterobacteriaceae (543)	Enterobacterales (91347)	Gammaproteobacteria (1236)	Proteobacteria (1224)	Bacteria (2)	3.1696	5.17525
NZ_CP026474.1	0.0962153	0	71	558	circular	2018-03-04	South Korea: Daegu		35.86	128.6	blood	Homo sapiens		IncFII(pAMA1167-NDM-5)_1, CP024805, |IncQ1_1, M28829, |IncFIB(AP001918)_1, AP001918, |IncFIA_1, AP001918,	IncF RST(F1:A-:B49):FIA(1,6);FIB(49);FIC(-);FII(1);FIIK(-);FIIS(-);FIIY(-)	107229	51.6884	Escherichia coli	Escherichia coli (562)	Escherichia (561)	Enterobacteriaceae (543)	Enterobacterales (91347)	Gammaproteobacteria (1236)	Proteobacteria (1224)	Bacteria (2)	3.70231	-1.72623
NZ_CP044962.1	0.0962153	0	71	559	circular	2019-10-17	Canada: BC	Canada,BC	55.0013	-125.002	not collected	Homo sapiens		IncC_1, JN157804,		126750	51.3231	Salmonella enterica subsp. enterica serovar 1,4,[5],12:i:-	Salmonella enterica (28901)	Salmonella (590)	Enterobacteriaceae (543)	Enterobacterales (91347)	Gammaproteobacteria (1236)	Proteobacteria (1224)	Bacteria (2)	1.34474	9.20388
NZ_CP011596.1	0.0962153	0	71	560	circular	2015-06-18	USA:Virginia		38.14	-78.45	Perirectal	Homo sapiens		IncFIB(K)(pCAV1099-114)_1, CP011596,	IncF RST(F-:A-:B-):FIA(-);FIB(-);FIC(-);FII(-);FIIK(-);FIIS(-);FIIY(-)	113992	51.5185	Klebsiella oxytoca	Klebsiella oxytoca (571)	Klebsiella (570)	Enterobacteriaceae (543)	Enterobacterales (91347)	Gammaproteobacteria (1236)	Proteobacteria (1224)	Bacteria (2)	-2.28823	12.0502
NZ_CP011617.1	0.0962153	0	71	561	linear	2015-06-18	USA:Virginia		38.14	-78.45	Urine/Genitourinary	Homo sapiens		IncFIB(K)(pCAV1099-114)_1, CP011596,	IncF RST(F-:A-:B-):FIA(-);FIB(-);FIC(-);FII(-);FIIK(-);FIIS(-);FIIY(-)	115319	51.4772	Klebsiella oxytoca	Klebsiella oxytoca (571)	Klebsiella (570)	Enterobacteriaceae (543)	Enterobacterales (91347)	Gammaproteobacteria (1236)	Proteobacteria (1224)	Bacteria (2)	-2.22645	12.0702
NZ_CP024430.1	0.0962153	0	71	562	circular	2018-03-20	Pakistan		29.5352	68.5547	Trachaeal secretion	Homo sapiens		IncR_1, DQ449578, |IncFII_1, AY458016,	IncF RST(F2:A-:B-):FIA(-);FIB(-);FIC(-);FII(2);FIIK(-);FIIS(-);FIIY(-)	131243	51.7948	Klebsiella pneumoniae	Klebsiella pneumoniae (573)	Klebsiella (570)	Enterobacteriaceae (543)	Enterobacterales (91347)	Gammaproteobacteria (1236)	Proteobacteria (1224)	Bacteria (2)	0.346748	5.33154
NZ_AP023225.1	0.0962153	0	71	563	circular	2020-06-27	Myanmar:Yangon		16.8661	96.1951		Homo sapiens		IncFII(pAMA1167-NDM-5)_1, CP024805, |IncFIA_1, AP001918, |IncFIB(AP001918)_1, AP001918, |IncQ1_1, M28829,	IncF RST(F1:A-:B49):FIA(1,6);FIB(49);FIC(-);FII(1);FIIK(-);FIIS(-);FIIY(-)	108281	51.8004	Escherichia coli	Escherichia coli (562)	Escherichia (561)	Enterobacteriaceae (543)	Enterobacterales (91347)	Gammaproteobacteria (1236)	Proteobacteria (1224)	Bacteria (2)	3.69862	-1.74747
CP052376.1	0.0962153	0	71	564	circular	2020-05-04	South Korea: Chungbuk		36.8	127.7	blood	Homo sapiens		IncR_1, DQ449578,		71695	51.0552	Klebsiella pneumoniae	Klebsiella pneumoniae (573)	Klebsiella (570)	Enterobacteriaceae (543)	Enterobacterales (91347)	Gammaproteobacteria (1236)	Proteobacteria (1224)	Bacteria (2)	4.62099	5.2199
NZ_MG516908.1	0.0962153	0	71	565	circular	2020-07-31								IncI1-I(Gamma)_1, AP005147,		112530	50.6754	Escherichia coli	Escherichia coli (562)	Escherichia (561)	Enterobacteriaceae (543)	Enterobacterales (91347)	Gammaproteobacteria (1236)	Proteobacteria (1224)	Bacteria (2)	7.31676	-3.82055
NZ_CP042486.1	0.0962153	0	71	566	not-set	2019-10-13	Australia: Sydney	Australia,Sydney	-33.8548	151.216	clinical sample	Homo sapiens	Whole organism			6953	53.7034	Klebsiella pneumoniae	Klebsiella pneumoniae (573)	Klebsiella (570)	Enterobacteriaceae (543)	Enterobacterales (91347)	Gammaproteobacteria (1236)	Proteobacteria (1224)	Bacteria (2)	4.29982	4.17436
NZ_CP040177.1	0.0962153	0	71	567	circular	2019-05-20	China: Chongqin	China,Chongqin	43.7987	125.39		Homo sapiens	whole organism	IncR_1, DQ449578,		28566	54.8694	Klebsiella pneumoniae	Klebsiella pneumoniae (573)	Klebsiella (570)	Enterobacteriaceae (543)	Enterobacterales (91347)	Gammaproteobacteria (1236)	Proteobacteria (1224)	Bacteria (2)	4.47752	5.0461
NZ_MF679146.1	0.0962153	0	71	568	circular	2020-07-31								IncFII_1, AY458016, |IncFIB(AP001918)_1, AP001918,	IncF RST(F2:A-:B1):FIA(-);FIB(1);FIC(-);FII(2);FIIK(-);FIIS(-);FIIY(-)	141555	51.9657	Escherichia coli	Escherichia coli (562)	Escherichia (561)	Enterobacteriaceae (543)	Enterobacterales (91347)	Gammaproteobacteria (1236)	Proteobacteria (1224)	Bacteria (2)	-1.40381	6.32608
NZ_CP050159.1	0.0962153	0	71	569	circular	2020-07-31	Hong Kong	Hong Kong	22.3506	114.185	rectal_swab	Homo sapiens		IncN_1, AY046276,	IncN MLST(7):repN(3);traJ(4);korA(2)	56780	50.9458	Enterobacter cloacae	Enterobacter cloacae (550)	Enterobacter (547)	Enterobacteriaceae (543)	Enterobacterales (91347)	Gammaproteobacteria (1236)	Proteobacteria (1224)	Bacteria (2)	3.26459	5.27047
NZ_CP020846.1	0.0962153	0	71	570	circular	2017-05-25	USA: Houston		29.7107	-95.4006	respiratory	Homo sapiens		Col440I_1, CP023920,		12540	46.1164	Klebsiella pneumoniae	Klebsiella pneumoniae (573)	Klebsiella (570)	Enterobacteriaceae (543)	Enterobacterales (91347)	Gammaproteobacteria (1236)	Proteobacteria (1224)	Bacteria (2)	10.1018	10.7523
NZ_EU880929.1	0.0962153	0	71	571	circular	2020-06-03								IncN_1, AY046276,	IncN MLST(-):repN(2,2);traJ(1);korA(2)	64476	53.226	Klebsiella pneumoniae	Klebsiella pneumoniae (573)	Klebsiella (570)	Enterobacteriaceae (543)	Enterobacterales (91347)	Gammaproteobacteria (1236)	Proteobacteria (1224)	Bacteria (2)	3.45484	5.24147
NZ_CP035635.1	0.0962153	0	71	572	circular	2019-02-15	China:Anhui		31.49	117.13	blood	Homo sapiens				116221	52.0207	Enterobacter cloacae	Enterobacter cloacae (550)	Enterobacter (547)	Enterobacteriaceae (543)	Enterobacterales (91347)	Gammaproteobacteria (1236)	Proteobacteria (1224)	Bacteria (2)	4.33877	6.83393
NZ_CP064220.1	0.0962153	0	71	573	circular	2020-11-12	China:Nanchang	China,Nanchang	28.6793	115.889	blood		whole organism	IncFII(pHN7A8)_1, JN232517, |IncR_1, DQ449578,	IncF RST(F33:A-:B-):FIA(-);FIB(-);FIC(5?);FII(33);FIIK(-);FIIS(-);FIIY(-)	87179	51.2451	Klebsiella pneumoniae	Klebsiella pneumoniae (573)	Klebsiella (570)	Enterobacteriaceae (543)	Enterobacterales (91347)	Gammaproteobacteria (1236)	Proteobacteria (1224)	Bacteria (2)	5.78594	3.06932
NZ_CP064214.1	0.0962153	0	71	574	circular	2020-11-12	China:Nanchang	China,Nanchang	28.6793	115.889	blood		whole organism	IncFII(pHN7A8)_1, JN232517, |IncR_1, DQ449578,	IncF RST(F33:A-:B-):FIA(-);FIB(-);FIC(5?);FII(33);FIIK(-);FIIS(-);FIIY(-)	90714	51.3758	Klebsiella pneumoniae	Klebsiella pneumoniae (573)	Klebsiella (570)	Enterobacteriaceae (543)	Enterobacterales (91347)	Gammaproteobacteria (1236)	Proteobacteria (1224)	Bacteria (2)	5.80208	3.07149
NZ_CP064260.1	0.0962153	0	71	575	circular	2020-11-12	China:Nanchang	China,Nanchang	28.6793	115.889	blood		whole organism	IncFII(pHN7A8)_1, JN232517, |IncR_1, DQ449578,	IncF RST(F33:A-:B-):FIA(-);FIB(-);FIC(5?);FII(33);FIIK(-);FIIS(-);FIIY(-)	90714	51.3702	Klebsiella pneumoniae	Klebsiella pneumoniae (573)	Klebsiella (570)	Enterobacteriaceae (543)	Enterobacterales (91347)	Gammaproteobacteria (1236)	Proteobacteria (1224)	Bacteria (2)	5.79337	3.06828
NZ_CP064226.1	0.0962153	0	71	576	circular	2020-11-12	China:Nanchang	China,Nanchang	28.6793	115.889	blood		whole organism	IncR_1, DQ449578, |IncFII(pHN7A8)_1, JN232517,	IncF RST(F33:A-:B-):FIA(-);FIB(-);FIC(5?);FII(33);FIIK(-);FIIS(-);FIIY(-)	91913	51.4019	Klebsiella pneumoniae	Klebsiella pneumoniae (573)	Klebsiella (570)	Enterobacteriaceae (543)	Enterobacterales (91347)	Gammaproteobacteria (1236)	Proteobacteria (1224)	Bacteria (2)	5.79679	3.09306
NZ_CP041443.1	0.0968463	0	70	577	circular	2019-10-07	China: Yangzhou		32.24	119.26	Pork			IncFIB(K)_1, JN233704, |IncFIA(HI1)_1, AF250878, |IncX1_1, EU370913,	IncF RST(F-:A18:B-):FIA(18);FIB(-);FIC(-);FII(-);FIIK(-);FIIS(-);FIIY(-)	101987	50.0025	Escherichia coli	Escherichia coli (562)	Escherichia (561)	Enterobacteriaceae (543)	Enterobacterales (91347)	Gammaproteobacteria (1236)	Proteobacteria (1224)	Bacteria (2)	4.94742	5.11867
CP050278.1	0.0968463	0	70	578	circular	2020-03-29	China:Jiangxi,Nanchang		28.41	115.54	blood	Homo sapiens		IncFII(pHN7A8)_1, JN232517, |IncR_1, DQ449578,	IncF RST(F33:A-:B-):FIA(-);FIB(-);FIC(5?);FII(33);FIIK(-);FIIS(-);FIIY(-)	113516	50.7444	Klebsiella pneumoniae	Klebsiella pneumoniae (573)	Klebsiella (570)	Enterobacteriaceae (543)	Enterobacterales (91347)	Gammaproteobacteria (1236)	Proteobacteria (1224)	Bacteria (2)	5.78638	3.0746
NZ_AP019191.1	0.0968463	0	70	579	circular	2020-04-18	Myanmar:Yangon		16.7788	96.149		Homo sapiens		IncQ1_1, M28829, |IncFIB(AP001918)_1, AP001918, |IncFIA_1, AP001918, |IncFII(pAMA1167-NDM-5)_1, CP024805,	IncF RST(F1:A-:B49):FIA(1,6);FIB(49);FIC(-);FII(1);FIIK(-);FIIS(-);FIIY(-)	110735	51.9068	Escherichia coli	Escherichia coli (562)	Escherichia (561)	Enterobacteriaceae (543)	Enterobacterales (91347)	Gammaproteobacteria (1236)	Proteobacteria (1224)	Bacteria (2)	3.69725	-1.74396
NZ_MT320534.1	0.0968463	0	70	580	circular	2020-09-21								IncC_1, JN157804,		161319	52.4501	Proteus mirabilis	Proteus mirabilis (584)	Proteus (583)	Morganellaceae (1903414)	Enterobacterales (91347)	Gammaproteobacteria (1236)	Proteobacteria (1224)	Bacteria (2)	1.35032	9.53334
NZ_CP014775.1	0.0968463	0	70	581	circular	2016-05-28	USA		38.9847	-77.0947				IncC_1, JN157804,		198307	53.0718	Aeromonas veronii	Aeromonas veronii (654)	Aeromonas (642)	Aeromonadaceae (84642)	Aeromonadales (135624)	Gammaproteobacteria (1236)	Proteobacteria (1224)	Bacteria (2)	1.35448	9.58451
NZ_CP018105.1	0.0968463	0	70	582	circular	2016-12-03	Germany	Germany	51.0834	10.4234	clinical	Homo sapiens		IncR_1, DQ449578, |IncFIA(HI1)_1, AF250878,	IncF RST(F-:A-:B-):FIA(~18);FIB(-);FIC(-);FII(-);FIIK(-);FIIS(-);FIIY(-)	67946	51.354	Escherichia coli	Escherichia coli (562)	Escherichia (561)	Enterobacteriaceae (543)	Enterobacterales (91347)	Gammaproteobacteria (1236)	Proteobacteria (1224)	Bacteria (2)	4.50476	5.0151
CP044371.1	0.0968463	0	70	583	circular	2019-12-11	Taiwan	Taiwan	23.5983	120.835	missing	Homo sapiens		IncR_1, DQ449578,		44135	56.8596	Klebsiella pneumoniae	Klebsiella pneumoniae (573)	Klebsiella (570)	Enterobacteriaceae (543)	Enterobacterales (91347)	Gammaproteobacteria (1236)	Proteobacteria (1224)	Bacteria (2)	4.41793	4.89002
NZ_CP034789.1	0.0968463	0	70	584	circular	2019-01-12	China:Zhejiang	China,Zhejiang	29	120	chicken		cell culture	IncFIB(K)_1, JN233704,	IncF RST(F-:A-:B-):FIA(-);FIB(-);FIC(-);FII(-);FIIK(-);FIIS(-);FIIY(-)	159108	50.2558	Escherichia coli	Escherichia coli (562)	Escherichia (561)	Enterobacteriaceae (543)	Enterobacterales (91347)	Gammaproteobacteria (1236)	Proteobacteria (1224)	Bacteria (2)	-3.48909	-0.397979
NZ_CP033379.1	0.0968463	0	70	585	circular	2018-11-08	China: JiangSu		32.15	109.01	goose anus swab			IncN_1, AY046276, |IncX1_1, EU370913, |p0111_1, AP010962,	IncN MLST(-):repN(1?);traJ(-);korA(-)	167170	50.4756	Escherichia coli	Escherichia coli (562)	Escherichia (561)	Enterobacteriaceae (543)	Enterobacterales (91347)	Gammaproteobacteria (1236)	Proteobacteria (1224)	Bacteria (2)	-3.51069	-0.417948
NZ_CP056693.1	0.0968463	0	70	586	circular	2020-08-03	United Kingdom	United Kingdom	54.7024	-3.27658	Wastewater influent sample		culture	IncN_1, AY046276,	IncN MLST(9):repN(5);traJ(6);korA(3)	60264	52.8458	Enterobacter hormaechei	Enterobacter hormaechei (158836)	Enterobacter (547)	Enterobacteriaceae (543)	Enterobacterales (91347)	Gammaproteobacteria (1236)	Proteobacteria (1224)	Bacteria (2)	3.46475	5.44524
NZ_CP017930.1	0.0968463	0	70	587	linear	2016-11-08	USA:Virginia		38.14	-78.45	blood	Homo sapiens		IncFIB(K)(pCAV1099-114)_1, CP011596,	IncF RST(F-:A-:B-):FIA(-);FIB(-);FIC(-);FII(-);FIIK(-);FIIS(-);FIIY(-)	114139	51.4907	Klebsiella oxytoca	Klebsiella oxytoca (571)	Klebsiella (570)	Enterobacteriaceae (543)	Enterobacterales (91347)	Gammaproteobacteria (1236)	Proteobacteria (1224)	Bacteria (2)	-2.29229	12.0507
NZ_CP024805.1	0.0968463	0	70	588	circular	2017-12-06	Denmark	Denmark	56.2098	9.30008	liver	Homo sapiens		IncFIB(AP001918)_1, AP001918, |IncQ1_1, M28829, |IncFII(pAMA1167-NDM-5)_1, CP024805, |IncFIA_1, AP001918,	IncF RST(F1:A-:B-):FIA(1,6);FIB(49?);FIC(-);FII(1);FIIK(-);FIIS(-);FIIY(-)	111310	51.7312	Escherichia coli	Escherichia coli (562)	Escherichia (561)	Enterobacteriaceae (543)	Enterobacterales (91347)	Gammaproteobacteria (1236)	Proteobacteria (1224)	Bacteria (2)	3.69788	-1.75065
NZ_CP011589.1	0.0968463	0	70	589	circular	2015-06-18	USA:Virginia		38.14	-78.45	missing	Homo sapiens		IncN_1, AY046276,	IncN MLST(6):repN(2);traJ(4);korA(2)	59138	53.2602	Enterobacter asburiae	Enterobacter asburiae (61645)	Enterobacter (547)	Enterobacteriaceae (543)	Enterobacterales (91347)	Gammaproteobacteria (1236)	Proteobacteria (1224)	Bacteria (2)	3.4565	5.50059
NZ_CP009874.1	0.0968463	0	70	590	circular	2015-01-21	USA	USA	39.7837	-100.446	perirectal swab		missing	IncN_1, AY046276,	IncN MLST(-):repN(~6);traJ(~6);korA(~4)	50051	51.3456	Klebsiella pneumoniae subsp. pneumoniae	Klebsiella pneumoniae (573)	Klebsiella (570)	Enterobacteriaceae (543)	Enterobacterales (91347)	Gammaproteobacteria (1236)	Proteobacteria (1224)	Bacteria (2)	3.44875	5.34358
NZ_CP044142.1	0.0968463	0	70	591	circular	2019-10-07	missing				missing	missing		IncC_1, JN157804,		152532	52.4841	Escherichia coli O157	Escherichia coli (562)	Escherichia (561)	Enterobacteriaceae (543)	Enterobacterales (91347)	Gammaproteobacteria (1236)	Proteobacteria (1224)	Bacteria (2)	1.33373	9.53015
LR890319.1	0.0968463	0	70	592	circular	2020-10-30								IncR_1, DQ449578,		56100	52.4082	Klebsiella pneumoniae	Klebsiella pneumoniae (573)	Klebsiella (570)	Enterobacteriaceae (543)	Enterobacterales (91347)	Gammaproteobacteria (1236)	Proteobacteria (1224)	Bacteria (2)	4.88957	5.88498
NZ_CP039821.1	0.0968463	0	70	593	circular	2020-02-07	China:Wuhan	China,Wuhan	30.5941	114.298	urine	Homo sapiens	culture	IncN_1, AY046276,	IncN MLST(7):repN(3);traJ(4);korA(2)	63046	52.1524	Klebsiella pneumoniae	Klebsiella pneumoniae (573)	Klebsiella (570)	Enterobacteriaceae (543)	Enterobacterales (91347)	Gammaproteobacteria (1236)	Proteobacteria (1224)	Bacteria (2)	3.16293	5.18565
NZ_KJ909290.1	0.0968463	0	70	594	circular	2020-06-03								IncC_1, JN157804,		152216	52.4669	Aeromonas salmonicida subsp. salmonicida	Aeromonas salmonicida (645)	Aeromonas (642)	Aeromonadaceae (84642)	Aeromonadales (135624)	Gammaproteobacteria (1236)	Proteobacteria (1224)	Bacteria (2)	1.39961	9.48371
NZ_KR091911.1	0.0968463	0	70	595	circular	2020-06-03								IncC_1, JN157804,		187683	52.1523	Salmonella enterica subsp. enterica serovar Corvallis	Salmonella enterica (28901)	Salmonella (590)	Enterobacteriaceae (543)	Enterobacterales (91347)	Gammaproteobacteria (1236)	Proteobacteria (1224)	Bacteria (2)	1.35125	9.55096
NZ_KT818627.1	0.0968463	0	70	596	circular	2020-06-03								IncFII_1, AY458016, |IncR_1, DQ449578,	IncF RST(F2:A-:B-):FIA(-);FIB(-);FIC(-);FII(2);FIIK(-);FIIS(-);FIIY(-)	172679	52.6138	Klebsiella pneumoniae	Klebsiella pneumoniae (573)	Klebsiella (570)	Enterobacteriaceae (543)	Enterobacterales (91347)	Gammaproteobacteria (1236)	Proteobacteria (1224)	Bacteria (2)	0.625808	5.86452
NZ_KU315015.1	0.0968463	0	70	597	linear	2020-06-03								IncM1_1, U27345,		95855	53.6352	Serratia marcescens	Serratia marcescens (615)	Serratia (613)	Yersiniaceae (1903411)	Enterobacterales (91347)	Gammaproteobacteria (1236)	Proteobacteria (1224)	Bacteria (2)	-3.89232	9.00622
NZ_CP034755.1	0.0968463	0	70	598	circular	2020-01-15	USA	USA	39.7837	-100.446		Homo sapiens		IncFIB(pHCM2)_1, AL513384,	IncF RST(F-:A-:B-):FIA(-);FIB(-);FIC(-);FII(-);FIIK(-);FIIS(-);FIIY(-)	160216	52.9005	Enterobacter hormaechei subsp. hoffmannii	Enterobacter hormaechei (158836)	Enterobacter (547)	Enterobacteriaceae (543)	Enterobacterales (91347)	Gammaproteobacteria (1236)	Proteobacteria (1224)	Bacteria (2)	14.2446	-3.95576
NZ_MN101852.1	0.0974869	0	69	599	circular	2020-06-04								IncFII_1, AY458016,	IncF RST(F2:A-:B-):FIA(-);FIB(-);FIC(-);FII(2);FIIK(-);FIIS(-);FIIY(-)	98241	52.6908	Escherichia coli	Escherichia coli (562)	Escherichia (561)	Enterobacteriaceae (543)	Enterobacterales (91347)	Gammaproteobacteria (1236)	Proteobacteria (1224)	Bacteria (2)	0.533244	5.78473
NZ_CP042526.1	0.0974869	0	69	600	circular	2020-04-06	Australia: Sydney	Australia,Sydney	-33.8548	151.216	Shower 3		Whole organism	IncM2_1, AF550415,		87731	52.7886	Citrobacter freundii	Citrobacter freundii (546)	Citrobacter (544)	Enterobacteriaceae (543)	Enterobacterales (91347)	Gammaproteobacteria (1236)	Proteobacteria (1224)	Bacteria (2)	-3.96879	8.84272
NC_011385.1	0.0974869	0	69	601	circular	2008-10-22								IncN_1, AY046276,	IncN MLST(6):repN(2);traJ(4);korA(2)	75617	52.8029	Klebsiella pneumoniae	Klebsiella pneumoniae (573)	Klebsiella (570)	Enterobacteriaceae (543)	Enterobacterales (91347)	Gammaproteobacteria (1236)	Proteobacteria (1224)	Bacteria (2)	3.56192	5.57682
NZ_CP035669.1	0.0974869	0	69	602	circular	2019-02-19	USA: Mississippi	USA,Mississippi	32.9716	-89.7348	missing	catfish	single cell			117448	47.341	Edwardsiella piscicida	Edwardsiella piscicida (1263550)	Edwardsiella (635)	Hafniaceae (1903412)	Enterobacterales (91347)	Gammaproteobacteria (1236)	Proteobacteria (1224)	Bacteria (2)	4.65055	5.10096
NZ_CP010149.1	0.0974869	0	69	603	circular	2016-12-19	missing					dog		IncFIC(FII)_1, AP001918, |IncFIB(AP001918)_1, AP001918, |IncR_1, DQ449578,	IncF RST(--:A-:B1):FIA(-);FIB(1);FIC(4);FII(18);FIIK(-);FIIS(-);FIIY(-)	199494	51.4863	Escherichia coli	Escherichia coli (562)	Escherichia (561)	Enterobacteriaceae (543)	Enterobacterales (91347)	Gammaproteobacteria (1236)	Proteobacteria (1224)	Bacteria (2)	-1.74758	6.38727
NC_011092.1	0.0974869	0	69	604	circular	2008-07-31								IncFIB(K)_1, JN233704,	IncF RST(F-:A-:B-):FIA(-);FIB(-);FIC(-);FII(-);FIIK(-);FIIS(-);FIIY(-)	110227	53.9841	Salmonella enterica subsp. enterica serovar Schwarzengrund str. CVM19633	Salmonella enterica (28901)	Salmonella (590)	Enterobacteriaceae (543)	Enterobacterales (91347)	Gammaproteobacteria (1236)	Proteobacteria (1224)	Bacteria (2)	4.11016	6.04359
NZ_CP022451.1	0.0974869	0	69	605	circular	2017-07-28	China:Henan		34.73	113.7	chicken			IncQ1_1, M28829, |IncN_1, AY046276, |IncHI2_1, BX664015, |IncHI2A_1, BX664015,	IncN MLST(-):repN(1);traJ(-);korA(-)|IncHI2 DLST(-):smr0018(3);smr0199(-)	222470	47.5305	Salmonella enterica subsp. enterica serovar Indiana	Salmonella enterica (28901)	Salmonella (590)	Enterobacteriaceae (543)	Enterobacterales (91347)	Gammaproteobacteria (1236)	Proteobacteria (1224)	Bacteria (2)	-2.90146	14.7641
NZ_CP046118.1	0.0974869	0	69	606	circular	2019-11-26	China: Guangzhou		23.13	113.28	sputum	Homo sapiens		IncN_1, AY046276,	IncN MLST(7):repN(3);traJ(4);korA(2)	62663	52.3435	Enterobacter cloacae	Enterobacter cloacae (550)	Enterobacter (547)	Enterobacteriaceae (543)	Enterobacterales (91347)	Gammaproteobacteria (1236)	Proteobacteria (1224)	Bacteria (2)	3.17512	5.20046
NC_022375.1	0.0974869	0	69	607	circular	2013-09-24								IncN_1, AY046276,	IncN MLST(7):repN(3);traJ(4);korA(2)	59395	51.9236	Escherichia coli	Escherichia coli (562)	Escherichia (561)	Enterobacteriaceae (543)	Enterobacterales (91347)	Gammaproteobacteria (1236)	Proteobacteria (1224)	Bacteria (2)	3.13802	5.19232
NZ_CP042514.1	0.0974869	0	69	608	circular	2019-10-13	Australia: Sydney	Australia,Sydney	-33.8548	151.216	Ensuite 7/8		Whole organism	IncM2_1, AF550415,		87731	52.7898	Serratia marcescens	Serratia marcescens (615)	Serratia (613)	Yersiniaceae (1903411)	Enterobacterales (91347)	Gammaproteobacteria (1236)	Proteobacteria (1224)	Bacteria (2)	-3.96063	8.84385
NZ_KF534788.1	0.0974869	0	69	609	circular	2020-07-31								IncN_1, AY046276,	IncN MLST(7):repN(3);traJ(4);korA(2)	59400	51.9226	Escherichia coli	Escherichia coli (562)	Escherichia (561)	Enterobacteriaceae (543)	Enterobacterales (91347)	Gammaproteobacteria (1236)	Proteobacteria (1224)	Bacteria (2)	3.16826	5.19286
CP042600.1	0.0974869	0	69	610	circular	2019-08-15	Taiwan	Taiwan	23.5983	120.835	missing	Sus scrofa domesticus		IncFIB(AP001918)_1, AP001918, |IncFIA_1, AP001918,	IncF RST(F-:A-:B-):FIA(1,6);FIB(-);FIC(-);FII(-);FIIK(-);FIIS(-);FIIY(-)	121754	52.1897	Escherichia coli	Escherichia coli (562)	Escherichia (561)	Enterobacteriaceae (543)	Enterobacterales (91347)	Gammaproteobacteria (1236)	Proteobacteria (1224)	Bacteria (2)	-0.586094	6.07749
CP042640.1	0.0974869	0	69	611	circular	2019-08-15	Taiwan	Taiwan	23.5983	120.835	missing	Sus scrofa domesticus		IncFIB(AP001918)_1, AP001918, |IncFIC(FII)_1, AP001918,	IncF RST(F46:A-:B-):FIA(-);FIB(-);FIC(-);FII(46);FIIK(-);FIIS(-);FIIY(-)	99667	52.3212	Escherichia coli	Escherichia coli (562)	Escherichia (561)	Enterobacteriaceae (543)	Enterobacterales (91347)	Gammaproteobacteria (1236)	Proteobacteria (1224)	Bacteria (2)	-0.519832	6.1215
CP063738.1	0.0974869	0	69	612	circular	2020-11-05	USA:SC	USA,SC	33.6874	-80.4364	Veal			IncC_1, JN157804,		117402	52.327	Escherichia coli	Escherichia coli (562)	Escherichia (561)	Enterobacteriaceae (543)	Enterobacterales (91347)	Gammaproteobacteria (1236)	Proteobacteria (1224)	Bacteria (2)	1.35786	8.9899
NZ_MT560003.1	0.0974869	0	69	613	circular	2020-08-04								IncC_1, JN157804,		147359	53.5162	Salmonella enterica subsp. enterica serovar Thompson	Salmonella enterica (28901)	Salmonella (590)	Enterobacteriaceae (543)	Enterobacterales (91347)	Gammaproteobacteria (1236)	Proteobacteria (1224)	Bacteria (2)	1.36837	9.26696
AP022435.1	0.0974869	0	69	614	circular	2020-10-09	Japan:Tokyo	Japan,Tokyo	34.6969	139.405				IncN3_1, EF219134,	IncN MLST(-):repN(-);traJ(-);korA(-);(-);(-);(-);(-)	56044	51.7932	Enterobacter kobei	Enterobacter kobei (208224)	Enterobacter (547)	Enterobacteriaceae (543)	Enterobacterales (91347)	Gammaproteobacteria (1236)	Proteobacteria (1224)	Bacteria (2)	3.31656	6.34883
NZ_CP026169.1	0.0974869	0	69	615	circular	2018-01-31	USA		38.9847	-77.0947				IncN_1, AY046276,	IncN MLST(6):repN(2);traJ(4);korA(2)	58627	51.8686	Leclercia sp. LSNIH1	Leclercia sp. LSNIH1 (1920114)	Leclercia (83654)	Enterobacteriaceae (543)	Enterobacterales (91347)	Gammaproteobacteria (1236)	Proteobacteria (1224)	Bacteria (2)	3.42436	5.48076
NC_019368.1	0.0974869	0	69	616	circular	2012-11-14								IncM2_1, AF550415,		87731	52.7898	Enterobacter cloacae	Enterobacter cloacae (550)	Enterobacter (547)	Enterobacteriaceae (543)	Enterobacterales (91347)	Gammaproteobacteria (1236)	Proteobacteria (1224)	Bacteria (2)	-3.9568	8.84256
NZ_KU295131.1	0.0974869	0	69	617	circular	2020-06-03								IncN_1, AY046276, |IncY_1, K02380,	IncN MLST(6):repN(2);traJ(4);korA(2)	107760	53.5635	Escherichia coli	Escherichia coli (562)	Escherichia (561)	Enterobacteriaceae (543)	Enterobacterales (91347)	Gammaproteobacteria (1236)	Proteobacteria (1224)	Bacteria (2)	3.51019	5.47931
NZ_CP027200.1	0.0981375	0	68	618	circular	2018-02-27	China: Sichuan, Chengdu	China,Sichuan,Chengdu	30.6766	104.061	Sewage		Culture	IncFIB(AP001918)_1, AP001918, |IncFII_1, AY458016,	IncF RST(F47:A-:B-):FIA(-);FIB(75?);FIC(-);FII(47);FIIK(-);FIIS(-);FIIY(-)	75779	53.3815	Escherichia coli	Escherichia coli (562)	Escherichia (561)	Enterobacteriaceae (543)	Enterobacterales (91347)	Gammaproteobacteria (1236)	Proteobacteria (1224)	Bacteria (2)	-0.142244	6.05891
NZ_CP039952.1	0.0981375	0	68	619	circular	2020-07-04	Switzerland: Bern	Switzerland,Bern	46.9483	7.45145	tracheal aspirate	dog		IncFIB(K)_1, JN233704,	IncF RST(F-:A-:B-):FIA(-);FIB(-);FIC(-);FII(-);FIIK(-);FIIS(-);FIIY(-)	156332	52.1307	Klebsiella pneumoniae	Klebsiella pneumoniae (573)	Klebsiella (570)	Enterobacteriaceae (543)	Enterobacterales (91347)	Gammaproteobacteria (1236)	Proteobacteria (1224)	Bacteria (2)	5.66419	8.2175
NZ_MF497781.1	0.0981375	0	68	620	circular	2020-06-03								IncR_1, DQ449578,		81348	53.0953	Citrobacter freundii	Citrobacter freundii (546)	Citrobacter (544)	Enterobacteriaceae (543)	Enterobacterales (91347)	Gammaproteobacteria (1236)	Proteobacteria (1224)	Bacteria (2)	4.29331	4.76357
NZ_KY174332.1	0.0981375	0	68	621	circular	2020-06-03								IncFII(K)_1, CP000648, |IncR_1, DQ449578,	IncF RST(K5:A-:B-):FIA(-);FIB(-);FIC(-);FII(-);FIIK(5);FIIS(-);FIIY(-)	137060	51.9451	Klebsiella pneumoniae	Klebsiella pneumoniae (573)	Klebsiella (570)	Enterobacteriaceae (543)	Enterobacterales (91347)	Gammaproteobacteria (1236)	Proteobacteria (1224)	Bacteria (2)	6.05163	6.78287
CP052489.1	0.0981375	0	68	622	circular	2020-05-04	South Korea: Gangwon		37.82	128.16	blood	Homo sapiens		IncFIB(K)_1, JN233704,	IncF RST(F-:A-:B-):FIA(-);FIB(-);FIC(-);FII(-);FIIK(-);FIIS(-);FIIY(-)	155463	52.1288	Klebsiella pneumoniae	Klebsiella pneumoniae (573)	Klebsiella (570)	Enterobacteriaceae (543)	Enterobacterales (91347)	Gammaproteobacteria (1236)	Proteobacteria (1224)	Bacteria (2)	5.66824	8.21045
NZ_MG557999.1	0.0981375	0	68	623	circular	2020-06-03								IncR_1, DQ449578,		81348	53.0966	Escherichia coli	Escherichia coli (562)	Escherichia (561)	Enterobacteriaceae (543)	Enterobacterales (91347)	Gammaproteobacteria (1236)	Proteobacteria (1224)	Bacteria (2)	4.2907	4.76244
NZ_CP025252.1	0.0981375	0	68	624	circular	2018-01-11	Brazil: Belo Horizonte		-19.9245	-43.9352	urine	Homo sapiens		ColRNAI_1, DQ298019,		33924	57.393	Escherichia coli	Escherichia coli (562)	Escherichia (561)	Enterobacteriaceae (543)	Enterobacterales (91347)	Gammaproteobacteria (1236)	Proteobacteria (1224)	Bacteria (2)	4.38145	4.41791
NZ_CP021952.1	0.0981375	0	68	625	circular	2017-06-22	missing				missing	missing		IncFIA(HI1)_1, AF250878, |IncC_1, JN157804,	IncF RST(F-:A13:B-):FIA(13);FIB(-);FIC(-);FII(-);FIIK(-);FIIS(-);FIIY(-)	176349	51.9408	Klebsiella pneumoniae	Klebsiella pneumoniae (573)	Klebsiella (570)	Enterobacteriaceae (543)	Enterobacterales (91347)	Gammaproteobacteria (1236)	Proteobacteria (1224)	Bacteria (2)	1.82043	10.3504
MT742153.1	0.0981375	0	68	626	circular	2020-11-11								IncFII(pHN7A8)_1, JN232517, |IncX1_1, EU370913, |IncN_1, AY046276,	IncF RST(F33:A-:B-):FIA(-);FIB(-);FIC(5?);FII(33);FIIK(-);FIIS(-);FIIY(-)|IncN MLST(-):repN(1);traJ(-);korA(-)	128223	51.7551	Salmonella sp. S13	Salmonella sp. S13 (2686305)	Salmonella (590)	Enterobacteriaceae (543)	Enterobacterales (91347)	Gammaproteobacteria (1236)	Proteobacteria (1224)	Bacteria (2)	-0.23201	5.42678
NZ_CP031883.1	0.0981375	0	68	627	circular	2018-08-28	China: Sichuan		30.6416	104.061	sputum	Homo sapiens		IncR_1, DQ449578, |IncQ1_1, M28829, |IncFII(K)_1, CP000648, |IncFII(pHN7A8)_1, JN232517,	IncF RST(K-:A-:B-):FIA(-);FIB(-);FIC(-);FII(-);FIIK(2,7);FIIS(-);FIIY(-)	110966	52.1169	Klebsiella pneumoniae	Klebsiella pneumoniae (573)	Klebsiella (570)	Enterobacteriaceae (543)	Enterobacterales (91347)	Gammaproteobacteria (1236)	Proteobacteria (1224)	Bacteria (2)	6.26426	6.72764
NC_011383.1	0.0981375	0	68	628	circular	2008-10-22								IncN_1, AY046276,	IncN MLST(9):repN(5);traJ(6);korA(3)	70655	54.2934	Klebsiella pneumoniae	Klebsiella pneumoniae (573)	Klebsiella (570)	Enterobacteriaceae (543)	Enterobacterales (91347)	Gammaproteobacteria (1236)	Proteobacteria (1224)	Bacteria (2)	3.47426	5.50989
NZ_MN891676.1	0.0981375	0	68	629	circular	2020-08-04								IncU_1, DQ401103, |IncN_1, AY046276,	IncN MLST(7):repN(3);traJ(4);korA(2)	69297	52.9648	Klebsiella pneumoniae	Klebsiella pneumoniae (573)	Klebsiella (570)	Enterobacteriaceae (543)	Enterobacterales (91347)	Gammaproteobacteria (1236)	Proteobacteria (1224)	Bacteria (2)	3.36458	5.11349
NC_021667.1	0.0981375	0	68	630	circular	2013-07-05								IncC_1, JN157804,		171925	52.2868	Klebsiella pneumoniae	Klebsiella pneumoniae (573)	Klebsiella (570)	Enterobacteriaceae (543)	Enterobacterales (91347)	Gammaproteobacteria (1236)	Proteobacteria (1224)	Bacteria (2)	1.35695	9.55856
NZ_CP060808.1	0.0981375	0	68	631	circular	2020-09-07	China: Wenzhou		27.25	120	missing	Homo sapiens		IncR_1, DQ449578, |IncFII(K)_1, CP000648,	IncF RST(K5:A-:B-):FIA(-);FIB(-);FIC(-);FII(-);FIIK(5);FIIS(-);FIIY(-)	138721	51.9554	Klebsiella variicola	Klebsiella variicola (244366)	Klebsiella (570)	Enterobacteriaceae (543)	Enterobacterales (91347)	Gammaproteobacteria (1236)	Proteobacteria (1224)	Bacteria (2)	6.0723	6.77523
NZ_CP009862.1	0.0981375	0	68	632	circular	2015-01-21	USA	USA	39.7837	-100.446	rectal swab		missing	IncN_1, AY046276,	IncN MLST(6):repN(2);traJ(4);korA(2)	80186	53.9645	Escherichia coli	Escherichia coli (562)	Escherichia (561)	Enterobacteriaceae (543)	Enterobacterales (91347)	Gammaproteobacteria (1236)	Proteobacteria (1224)	Bacteria (2)	3.55317	5.59794
NZ_CP031581.1	0.0981375	0	68	633	circular	2019-02-08	Missing				Rectal swab	Homo sapiens		IncFII(K)_1, CP000648, |IncR_1, DQ449578, |IncFIA(HI1)_1, AF250878,	IncF RST(K2:A-:B-):FIA(~22);FIB(-);FIC(-);FII(-);FIIK(2);FIIS(-);FIIY(-)	71335	50.3736	Klebsiella pneumoniae	Klebsiella pneumoniae (573)	Klebsiella (570)	Enterobacteriaceae (543)	Enterobacterales (91347)	Gammaproteobacteria (1236)	Proteobacteria (1224)	Bacteria (2)	4.74505	5.66693
NZ_CP029580.1	0.0981375	0	68	634	circular	2018-06-02	Sweden	Sweden	59.675	14.5209		Homo sapiens	unknown	IncFIA_1, AP001918, |IncFIB(AP001918)_1, AP001918, |Col156_1, NC_009781, |IncFII(pRSB107)_1, AJ851089,	IncF RST(F1:A6:B20):FIA(6);FIB(20);FIC(3?);FII(1);FIIK(-);FIIS(-);FIIY(-)	178078	52.199	Escherichia coli	Escherichia coli (562)	Escherichia (561)	Enterobacteriaceae (543)	Enterobacterales (91347)	Gammaproteobacteria (1236)	Proteobacteria (1224)	Bacteria (2)	3.86055	-2.12404
LR890753.1	0.0981375	0	68	635	circular	2020-10-30								IncR_1, DQ449578,		44503	55.9198	Klebsiella pneumoniae	Klebsiella pneumoniae (573)	Klebsiella (570)	Enterobacteriaceae (543)	Enterobacterales (91347)	Gammaproteobacteria (1236)	Proteobacteria (1224)	Bacteria (2)	4.35783	4.84997
NZ_CP016381.1	0.0981375	0	68	636	circular	2016-07-20	USA	USA	39.7837	-100.446	Perirectal swab	Homo sapiens	culture			143348	56.5093	Aeromonas hydrophila	Aeromonas hydrophila (644)	Aeromonas (642)	Aeromonadaceae (84642)	Aeromonadales (135624)	Gammaproteobacteria (1236)	Proteobacteria (1224)	Bacteria (2)	2.09777	9.43792
CP052270.1	0.0981375	0	68	637	circular	2020-05-04	South Korea: Jeonnam		34.87	126.99	blood	Homo sapiens		IncFIB(K)_1, JN233704,	IncF RST(F-:A-:B-):FIA(-);FIB(-);FIC(-);FII(-);FIIK(-);FIIS(-);FIIY(-)	157059	52.132	Klebsiella pneumoniae	Klebsiella pneumoniae (573)	Klebsiella (570)	Enterobacteriaceae (543)	Enterobacterales (91347)	Gammaproteobacteria (1236)	Proteobacteria (1224)	Bacteria (2)	5.66551	8.22515
NZ_CP019261.1	0.0981375	0	68	638	circular	2019-08-25	Hong Kong	Hong Kong	22.3506	114.185	stool	chicken	whole organism	IncFIC(FII)_1, AP001918, |IncFIB(AP001918)_1, AP001918,	IncF RST(F46:A-:B20):FIA(-);FIB(20);FIC(~4);FII(46);FIIK(-);FIIS(-);FIIY(-)	138610	51.9659	Escherichia coli	Escherichia coli (562)	Escherichia (561)	Enterobacteriaceae (543)	Enterobacterales (91347)	Gammaproteobacteria (1236)	Proteobacteria (1224)	Bacteria (2)	-0.474408	6.11451
NZ_CP020059.1	0.0987984	0	67	639	circular	2017-03-23	missing				missing	missing		IncFII(Yp)_1, CP000670, |IncN_1, AY046276,	IncF RST(Y6:A-:B-):FIA(-);FIB(-);FIC(-);FII(-);FIIK(28?);FIIS(-);FIIY(6)|IncN MLST(6):repN(2);traJ(4);korA(2)	87982	53.0063	Escherichia coli	Escherichia coli (562)	Escherichia (561)	Enterobacteriaceae (543)	Enterobacterales (91347)	Gammaproteobacteria (1236)	Proteobacteria (1224)	Bacteria (2)	3.4872	5.50645
NZ_MG252895.1	0.0987984	0	67	640	circular	2020-06-03								IncC_1, JN157804, |IncR_1, DQ449578,		300958	51.6251	Escherichia coli	Escherichia coli (562)	Escherichia (561)	Enterobacteriaceae (543)	Enterobacterales (91347)	Gammaproteobacteria (1236)	Proteobacteria (1224)	Bacteria (2)	1.39631	9.60066
NZ_MG450360.1	0.0987984	0	67	641	circular	2020-06-03								IncC_1, JN157804,		189866	51.9661	Escherichia coli	Escherichia coli (562)	Escherichia (561)	Enterobacteriaceae (543)	Enterobacterales (91347)	Gammaproteobacteria (1236)	Proteobacteria (1224)	Bacteria (2)	1.37531	9.55726
NZ_CP012903.1	0.0987984	0	67	642	circular	2020-04-20	Canada	Canada	61.0667	-107.992	missing	Homo sapiens		IncT_1, AP004237,		117812	47.4035	Providencia rettgeri	Providencia rettgeri (587)	Providencia (586)	Morganellaceae (1903414)	Enterobacterales (91347)	Gammaproteobacteria (1236)	Proteobacteria (1224)	Bacteria (2)	4.20876	5.60988
NZ_MH745929.1	0.0987984	0	67	643	circular	2020-06-03								IncFIB(K)_1, JN233704,	IncF RST(F-:A-:B-):FIA(-);FIB(-);FIC(-);FII(-);FIIK(-);FIIS(-);FIIY(-)	154745	52.1335	Klebsiella pneumoniae	Klebsiella pneumoniae (573)	Klebsiella (570)	Enterobacteriaceae (543)	Enterobacterales (91347)	Gammaproteobacteria (1236)	Proteobacteria (1224)	Bacteria (2)	5.66623	8.22001
NZ_LT985277.1	0.0987984	0	67	644	circular	2018-03-15								IncFII_1, AY458016,	IncF RST(F2:A-:B-):FIA(-);FIB(-);FIC(-);FII(2);FIIK(-);FIIS(-);FIIY(-)	121398	52.1813	Escherichia coli	Escherichia coli (562)	Escherichia (561)	Enterobacteriaceae (543)	Enterobacterales (91347)	Gammaproteobacteria (1236)	Proteobacteria (1224)	Bacteria (2)	0.543897	5.729
NC_019121.1	0.0987984	0	67	645	circular	2012-11-03								IncC_1, JN157804,		165791	53.0885	Salmonella enterica subsp. enterica serovar Heidelberg	Salmonella enterica (28901)	Salmonella (590)	Enterobacteriaceae (543)	Enterobacterales (91347)	Gammaproteobacteria (1236)	Proteobacteria (1224)	Bacteria (2)	1.35892	9.54954
NZ_CP042574.1	0.0987984	0	67	646	circular	2019-10-17	Australia: Sydney	Australia,Sydney	-33.8548	151.216	Shower 3		Whole organism	IncM2_1, AF550415,		86404	52.8552	Enterobacter hormaechei	Enterobacter hormaechei (158836)	Enterobacter (547)	Enterobacteriaceae (543)	Enterobacterales (91347)	Gammaproteobacteria (1236)	Proteobacteria (1224)	Bacteria (2)	-3.95046	8.84368
NZ_CP045678.1	0.0987984	0	67	647	circular	2020-01-17	China		30.26	120.2	rectum	Homo sapiens				94887	52.1631	Klebsiella pneumoniae	Klebsiella pneumoniae (573)	Klebsiella (570)	Enterobacteriaceae (543)	Enterobacterales (91347)	Gammaproteobacteria (1236)	Proteobacteria (1224)	Bacteria (2)	6.05458	6.60404
NZ_CP025758.1	0.0987984	0	67	648	circular	2018-01-18	USA		38.9847	-77.0947				IncN_1, AY046276,	IncN MLST(6):repN(2);traJ(4);korA(2)	62588	53.0325	Citrobacter freundii complex sp. CFNIH2	Citrobacter freundii complex sp. CFNIH2 (2066049)	Citrobacter (544)	Enterobacteriaceae (543)	Enterobacterales (91347)	Gammaproteobacteria (1236)	Proteobacteria (1224)	Bacteria (2)	3.49177	5.55155
NZ_CP024431.1	0.0987984	0	67	649	circular	2018-03-20	Pakistan		29.5352	68.5547	Trachaeal secretion	Homo sapiens		IncFII(pKPX1)_1, AP012055,	IncF RST(F-:A-:B-):FIA(-);FIB(-);FIC(-);FII(-);FIIK(-);FIIS(-);FIIY(-)	114815	53.1734	Klebsiella pneumoniae	Klebsiella pneumoniae (573)	Klebsiella (570)	Enterobacteriaceae (543)	Enterobacterales (91347)	Gammaproteobacteria (1236)	Proteobacteria (1224)	Bacteria (2)	16.4798	1.95979
NZ_CP009864.1	0.0987984	0	67	650	circular	2015-01-21	USA	USA	39.7837	-100.446	perirectal swab		missing	IncN_1, AY046276,	IncN MLST(6):repN(2);traJ(4);korA(2)	62589	53.0333	Klebsiella pneumoniae subsp. pneumoniae	Klebsiella pneumoniae (573)	Klebsiella (570)	Enterobacteriaceae (543)	Enterobacterales (91347)	Gammaproteobacteria (1236)	Proteobacteria (1224)	Bacteria (2)	3.47984	5.51558
NZ_CP051750.1	0.0987984	0	67	651	circular	2020-05-02	USA: California	USA,California	36.7015	-118.756	rectal swab from healthy college student	Homo sapiens	whole organism	IncFIB(AP001918)_1, AP001918, |IncFII_1, AY458016,	IncF RST(F24:A-:B-):FIA(-);FIB(58?);FIC(-);FII(24);FIIK(-);FIIS(-);FIIY(-)	84296	51.5718	Escherichia coli	Escherichia coli (562)	Escherichia (561)	Enterobacteriaceae (543)	Enterobacterales (91347)	Gammaproteobacteria (1236)	Proteobacteria (1224)	Bacteria (2)	-1.51521	6.37836
CP052209.1	0.0987984	0	67	652	circular	2020-05-04	South Korea: Jeonnam		34.87	126.99	blood	Homo sapiens		IncFIB(K)_1, JN233704,	IncF RST(F-:A-:B-):FIA(-);FIB(-);FIC(-);FII(-);FIIK(-);FIIS(-);FIIY(-)	152323	52.1589	Klebsiella pneumoniae	Klebsiella pneumoniae (573)	Klebsiella (570)	Enterobacteriaceae (543)	Enterobacterales (91347)	Gammaproteobacteria (1236)	Proteobacteria (1224)	Bacteria (2)	5.65686	8.22066
NZ_CP044187.1	0.0987984	0	67	653	linear	2019-10-07	missing				missing	missing		IncN_1, AY046276,	IncN MLST(6):repN(2);traJ(4);korA(2)	62424	52.813	Salmonella enterica subsp. enterica serovar Cubana	Salmonella enterica (28901)	Salmonella (590)	Enterobacteriaceae (543)	Enterobacterales (91347)	Gammaproteobacteria (1236)	Proteobacteria (1224)	Bacteria (2)	3.48602	5.51618
NZ_CP040178.1	0.0987984	0	67	654	linear	2019-05-20	China: Chongqin	China,Chongqin	43.7987	125.39		Homo sapiens	whole organism	IncN_1, AY046276,	IncN MLST(7):repN(3);traJ(4);korA(2)	59952	52.4053	Klebsiella pneumoniae	Klebsiella pneumoniae (573)	Klebsiella (570)	Enterobacteriaceae (543)	Enterobacterales (91347)	Gammaproteobacteria (1236)	Proteobacteria (1224)	Bacteria (2)	3.15833	5.19061
NZ_CP027679.1	0.0987984	0	67	655	circular	2018-04-28	Germany	Germany	51.0834	10.4234	wild bird		bacterial culture	IncC_1, JN157804,		177190	51.7659	Salmonella enterica subsp. enterica serovar Corvallis	Salmonella enterica (28901)	Salmonella (590)	Enterobacteriaceae (543)	Enterobacterales (91347)	Gammaproteobacteria (1236)	Proteobacteria (1224)	Bacteria (2)	1.36005	9.54949
CP052296.1	0.0987984	0	67	656	circular	2020-05-04	South Korea: Jeonnam		34.87	126.99	blood	Homo sapiens		IncFIB(K)_1, JN233704, |Col(pHAD28)_1, KU674895, |IncFII(pKP91)_1, CP000966,	IncF RST(K9:A-:B-):FIA(-);FIB(-);FIC(-);FII(-);FIIK(9);FIIS(-);FIIY(-)	234247	51.9926	Klebsiella pneumoniae	Klebsiella pneumoniae (573)	Klebsiella (570)	Enterobacteriaceae (543)	Enterobacterales (91347)	Gammaproteobacteria (1236)	Proteobacteria (1224)	Bacteria (2)	5.64678	8.66998
NC_012886.1	0.0987984	0	67	657	circular	2009-06-30								IncA_1, FJ705807,		52637	52.0413	Escherichia coli	Escherichia coli (562)	Escherichia (561)	Enterobacteriaceae (543)	Enterobacterales (91347)	Gammaproteobacteria (1236)	Proteobacteria (1224)	Bacteria (2)	4.54803	2.34282
CP012668.1	0.0987984	0	67	658	circular	2017-09-19	China:Jiangxi		28.68	115.89	patient	Homo sapiens		IncC_1, JN157804,		180116	51.5307	Vibrio cholerae	Vibrio cholerae (666)	Vibrio (662)	Vibrionaceae (641)	Vibrionales (135623)	Gammaproteobacteria (1236)	Proteobacteria (1224)	Bacteria (2)	2.04279	9.28654
NZ_KU295134.1	0.0987984	0	67	659	circular	2020-06-03								IncN_1, AY046276, |IncFII(Yp)_1, CP000670,	IncN MLST(6):repN(2);traJ(4);korA(2)|IncF RST(Y6:A-:B-):FIA(-);FIB(-);FIC(-);FII(-);FIIK(28?);FIIS(-);FIIY(6)	87982	53.0074	Escherichia coli	Escherichia coli (562)	Escherichia (561)	Enterobacteriaceae (543)	Enterobacterales (91347)	Gammaproteobacteria (1236)	Proteobacteria (1224)	Bacteria (2)	3.48645	5.53619
NZ_AP021931.1	0.0994698	0	66	660	circular	2020-08-13	Japan:Tokyo		35.664	139.438				FIA(pBK30683)_1, KF954760,		130287	51.2929	Klebsiella pneumoniae	Klebsiella pneumoniae (573)	Klebsiella (570)	Enterobacteriaceae (543)	Enterobacterales (91347)	Gammaproteobacteria (1236)	Proteobacteria (1224)	Bacteria (2)	6.04317	6.59779
NZ_CP035538.1	0.0994698	0	66	661	circular	2019-08-15	Canada:Quebec City		46.8371	-71.2265	anal sample	Homo sapiens		IncR_1, DQ449578, |IncFIA(HI1)_1, AF250878,	IncF RST(F-:A13:B-):FIA(13);FIB(-);FIC(-);FII(-);FIIK(-);FIIS(-);FIIY(-)	48698	53.4252	Klebsiella pneumoniae subsp. pneumoniae	Klebsiella pneumoniae (573)	Klebsiella (570)	Enterobacteriaceae (543)	Enterobacterales (91347)	Gammaproteobacteria (1236)	Proteobacteria (1224)	Bacteria (2)	4.41544	5.61102
NZ_MF589339.1	0.0994698	0	66	662	circular	2020-06-03								IncFII_1, AY458016, |IncX1_1, EU370913, |IncN_1, AY046276, |IncR_1, DQ449578, |IncFIB(AP001918)_1, AP001918,	IncF RST(F24:A-:B1):FIA(-);FIB(1);FIC(-);FII(24);FIIK(-);FIIS(-);FIIY(-)|IncN MLST(-):repN(1?);traJ(-);korA(-)	222492	50.9272	Escherichia coli	Escherichia coli (562)	Escherichia (561)	Enterobacteriaceae (543)	Enterobacterales (91347)	Gammaproteobacteria (1236)	Proteobacteria (1224)	Bacteria (2)	-1.60012	6.36744
NZ_MH179305.1	0.0994698	0	66	663	circular	2020-06-03								IncHI2_1, BX664015, |IncHI2A_1, BX664015, |IncN_1, AY046276,	IncHI2 DLST(-):smr0018(3);smr0199(-)|IncN MLST(-):repN(2?);traJ(-);korA(-)	244936	47.3303	Salmonella enterica subsp. enterica serovar Indiana	Salmonella enterica (28901)	Salmonella (590)	Enterobacteriaceae (543)	Enterobacterales (91347)	Gammaproteobacteria (1236)	Proteobacteria (1224)	Bacteria (2)	-2.86927	14.7185
NZ_CP047634.1	0.0994698	0	66	664	circular	2020-03-01	China:Shanghai	China,Shanghai	31.2253	121.489	blood		cell culture			174647	53.1924	Klebsiella pneumoniae	Klebsiella pneumoniae (573)	Klebsiella (570)	Enterobacteriaceae (543)	Enterobacterales (91347)	Gammaproteobacteria (1236)	Proteobacteria (1224)	Bacteria (2)	6.30983	7.32788
NZ_CP041631.1	0.0994698	0	66	665	circular	2020-01-24	China: Henan	China,Henan	34	114		pig	faecal sample	IncX1_1, EU370913,		27108	47.8346	Escherichia coli	Escherichia coli (562)	Escherichia (561)	Enterobacteriaceae (543)	Enterobacterales (91347)	Gammaproteobacteria (1236)	Proteobacteria (1224)	Bacteria (2)	5.11723	4.57296
NZ_CP050780.1	0.0994698	0	66	666	circular	2020-04-08	China:Shanghai		31.23	121.47	Chicken product	chicken		IncHI2A_1, BX664015, |IncHI2_1, BX664015, |IncN_1, AY046276,	IncHI2 DLST(-):smr0018(3);smr0199(-)|IncN MLST(-):repN(1);traJ(-);korA(-)	239058	47.2977	Salmonella enterica subsp. enterica serovar Indiana	Salmonella enterica (28901)	Salmonella (590)	Enterobacteriaceae (543)	Enterobacterales (91347)	Gammaproteobacteria (1236)	Proteobacteria (1224)	Bacteria (2)	-2.90388	14.7533
NC_032101.1	0.0994698	0	66	667	circular	2016-12-14								IncN_1, AY046276,	IncN MLST(-):repN(6);traJ(10);korA(4)	58120	52.512	Enterobacter cloacae	Enterobacter cloacae (550)	Enterobacter (547)	Enterobacteriaceae (543)	Enterobacterales (91347)	Gammaproteobacteria (1236)	Proteobacteria (1224)	Bacteria (2)	3.41089	5.30316
NZ_CP020066.1	0.0994698	0	66	668	circular	2017-03-23	missing				missing	missing		IncN_1, AY046276, |ColRNAI_1, DQ298019,	IncN MLST(6):repN(2);traJ(4);korA(2)	72663	53.422	Klebsiella pneumoniae	Klebsiella pneumoniae (573)	Klebsiella (570)	Enterobacteriaceae (543)	Enterobacterales (91347)	Gammaproteobacteria (1236)	Proteobacteria (1224)	Bacteria (2)	3.49211	5.5466
NZ_AP022359.1	0.0994698	0	66	669	circular	2020-08-04	Japan:Osaka	Japan,Osaka	34.6938	135.501		Homo sapiens		IncFIA_1, AP001918, |IncFII(pRSB107)_1, AJ851089, |IncN_1, AY046276, |IncFIB(AP001918)_1, AP001918,	IncF RST(F1:A6:B-):FIA(6);FIB(20?);FIC(3?);FII(1);FIIK(-);FIIS(-);FIIY(-)|IncN MLST(5):repN(2);traJ(3);korA(2)	146404	50.849	Escherichia coli	Escherichia coli (562)	Escherichia (561)	Enterobacteriaceae (543)	Enterobacterales (91347)	Gammaproteobacteria (1236)	Proteobacteria (1224)	Bacteria (2)	3.86139	-2.10735
NZ_LC520276.1	0.0994698	0	66	670	circular	2020-08-04	Japan	Japan	36.5748	139.239		Homo sapiens		IncFIB(AP001918)_1, AP001918, |IncFII(pRSB107)_1, AJ851089, |IncFIA_1, AP001918,	IncF RST(F1:A-:B-):FIA(2,6);FIB(20?);FIC(3?);FII(1);FIIK(-);FIIS(-);FIIY(-)	97569	52.1323	Escherichia coli	Escherichia coli (562)	Escherichia (561)	Enterobacteriaceae (543)	Enterobacterales (91347)	Gammaproteobacteria (1236)	Proteobacteria (1224)	Bacteria (2)	3.89283	-2.08377
NZ_CP006922.1	0.0994698	0	66	671	circular	2015-01-21								IncFII(Yp)_1, CP000670,	IncF RST(Y6:A-:B-):FIA(-);FIB(-);FIC(-);FII(-);FIIK(28?);FIIS(-);FIIY(6)	86232	54.5668	Klebsiella pneumoniae 30684/NJST258_2	Klebsiella pneumoniae (573)	Klebsiella (570)	Enterobacteriaceae (543)	Enterobacterales (91347)	Gammaproteobacteria (1236)	Proteobacteria (1224)	Bacteria (2)	5.44446	6.37749
NZ_CP025737.1	0.0994698	0	66	672	circular	2019-01-09	South Korea		36.6395	127.329	Human Stool	Homo sapiens		IncFIB(AP001918)_1, AP001918, |IncFIA_1, AP001918,	IncF RST(F-:A-:B1):FIA(1,6);FIB(1);FIC(-);FII(-);FIIK(-);FIIS(-);FIIY(-)	99333	52.0039	Salmonella enterica	Salmonella enterica (28901)	Salmonella (590)	Enterobacteriaceae (543)	Enterobacterales (91347)	Gammaproteobacteria (1236)	Proteobacteria (1224)	Bacteria (2)	3.42455	-2.21866
NZ_CP041180.1	0.0994698	0	66	673	circular	2019-09-11	China:Shanxi		31.22	121.1	chicken	not collected		IncHI2A_1, BX664015, |IncQ1_1, M28829, |IncN_1, AY046276, |IncHI2_1, BX664015,	IncHI2 DLST(-):smr0018(3);smr0199(-)|IncN MLST(-):repN(1);traJ(-);korA(-)	236217	48.1595	Salmonella enterica subsp. enterica serovar Indiana	Salmonella enterica (28901)	Salmonella (590)	Enterobacteriaceae (543)	Enterobacterales (91347)	Gammaproteobacteria (1236)	Proteobacteria (1224)	Bacteria (2)	-2.91196	14.7641
NZ_CP041182.1	0.0994698	0	66	674	circular	2019-09-11	China:Shanghai		31.22	121.1	chicken	not collected		IncHI2_1, BX664015, |IncHI2A_1, BX664015, |IncQ1_1, M28829, |IncN_1, AY046276,	IncHI2 DLST(-):smr0018(3);smr0199(-)|IncN MLST(-):repN(1);traJ(-);korA(-)	240209	48.4745	Salmonella enterica subsp. enterica serovar Indiana	Salmonella enterica (28901)	Salmonella (590)	Enterobacteriaceae (543)	Enterobacterales (91347)	Gammaproteobacteria (1236)	Proteobacteria (1224)	Bacteria (2)	-2.90123	14.7626
NZ_CP061833.1	0.0994698	0	66	675	circular	2020-09-29	Chile	Chile	-31.7613	-71.3188	blood	Homo sapiens		IncFIB(K)_1, JN233704, |IncFII(K)_1, CP000648,	IncF RST(K7:A-:B-):FIA(-);FIB(-);FIC(-);FII(-);FIIK(7);FIIS(-);FIIY(-)	193300	51.6327	Klebsiella pneumoniae	Klebsiella pneumoniae (573)	Klebsiella (570)	Enterobacteriaceae (543)	Enterobacterales (91347)	Gammaproteobacteria (1236)	Proteobacteria (1224)	Bacteria (2)	5.83691	8.40876
NZ_CP050160.1	0.0994698	0	66	676	circular	2020-07-31	Hong Kong	Hong Kong	22.3506	114.185	rectal_swab	Homo sapiens		IncN_1, AY046276,	IncN MLST(7):repN(3);traJ(4);korA(2)	60074	50.6509	Escherichia coli	Escherichia coli (562)	Escherichia (561)	Enterobacteriaceae (543)	Enterobacterales (91347)	Gammaproteobacteria (1236)	Proteobacteria (1224)	Bacteria (2)	3.26755	5.24711
NC_016974.1	0.0994698	0	66	677	circular	2012-03-13								IncC_1, JN157804,		178277	51.4396	Providencia stuartii	Providencia stuartii (588)	Providencia (586)	Morganellaceae (1903414)	Enterobacterales (91347)	Gammaproteobacteria (1236)	Proteobacteria (1224)	Bacteria (2)	1.3831	9.54855
NZ_KY051550.1	0.0994698	0	66	678	circular	2020-07-31								IncFIB(K)_1, JN233704,	IncF RST(F-:A-:B-):FIA(-);FIB(-);FIC(-);FII(-);FIIK(-);FIIS(-);FIIY(-)	79147	53.3564	Escherichia coli	Escherichia coli (562)	Escherichia (561)	Enterobacteriaceae (543)	Enterobacterales (91347)	Gammaproteobacteria (1236)	Proteobacteria (1224)	Bacteria (2)	4.12085	6.0553
NZ_CP063938.1	0.0994698	0	66	679	circular	2020-11-10	China:Tangshan		39.36	118.11	Human fecal samples			IncR_1, DQ449578,		62783	53.1832	Klebsiella pneumoniae	Klebsiella pneumoniae (573)	Klebsiella (570)	Enterobacteriaceae (543)	Enterobacterales (91347)	Gammaproteobacteria (1236)	Proteobacteria (1224)	Bacteria (2)	4.59056	5.19501
NZ_CP009411.1	0.0994698	0	66	680	circular	2020-04-20	USA:MD	USA,MD	39.5162	-76.9382	ground turkey			IncC_1, JN157804,		166496	52.1442	Salmonella enterica	Salmonella enterica (28901)	Salmonella (590)	Enterobacteriaceae (543)	Enterobacterales (91347)	Gammaproteobacteria (1236)	Proteobacteria (1224)	Bacteria (2)	1.34895	9.52409
NZ_KU051710.1	0.0994698	0	66	681	circular	2020-06-03								IncN_1, AY046276,	IncN MLST(7):repN(3);traJ(4);korA(2)	50546	50.4906	Citrobacter freundii	Citrobacter freundii (546)	Citrobacter (544)	Enterobacteriaceae (543)	Enterobacterales (91347)	Gammaproteobacteria (1236)	Proteobacteria (1224)	Bacteria (2)	3.28706	5.19861
