# Supplementary material for: Identification of a Novel IncHI1B Plasmid in MDR Klebsiella pneumoniae 200 from Swine in China
Source: Antibiotics (Basel). 2022 Sep 9;11(9):1225. doi: 10.3390/antibiotics11091225 (PMC9494989; doi:10.3390/antibiotics11091225)
Supplement: Supplementary file 1 [file antibiotics-11-01225-s001.zip › Table S4.xlsx]

## Sheet: Sheet2
Table S4. Compared plasmid pYhe2001 with the plasmid records contained in PLSDB
ACC_NUCCORE	distance	pvalue	shared_hashes	recid	Topology_NUCCORE	CreateDate_NUCCORE	Location_BIOSAMPLE	loc_parsed	loc_lat	loc_lng	IsolationSource_BIOSAMPLE	Host_BIOSAMPLE	SamplType_BIOSAMPLE	plasmidfinder	pmlst	Length_NUCCORE	GC_NUCCORE	taxon_name	taxon_species_name	taxon_genus_name	taxon_family_name	taxon_order_name	taxon_class_name	taxon_phylum_name	taxon_superkingdom_name	D1	D2
LR890287.1	0.0179508	0	522	1	circular	2020-10-30								IncFIB(K)(pCAV1099-114)_1, CP011596,	IncF RST(F-:A-:B-):FIA(-);FIB(-);FIC(-);FII(-);FIIK(-);FIIS(-);FIIY(-)	168148	49.8906	Klebsiella pneumoniae	Klebsiella pneumoniae (573)	Klebsiella (570)	Enterobacteriaceae (543)	Enterobacterales (91347)	Gammaproteobacteria (1236)	Proteobacteria (1224)	Bacteria (2)	5.20932	7.90665
LR890354.1	0.0206126	0	480	2	circular	2020-10-30	Australia: Melbourne		-37.8457	144.982	rectal swab	Homo sapiens		IncFIB(K)(pCAV1099-114)_1, CP011596,	IncF RST(F-:A-:B-):FIA(-);FIB(-);FIC(-);FII(-);FIIK(-);FIIS(-);FIIY(-)	175381	49.5282	Klebsiella pneumoniae	Klebsiella pneumoniae (573)	Klebsiella (570)	Enterobacteriaceae (543)	Enterobacterales (91347)	Gammaproteobacteria (1236)	Proteobacteria (1224)	Bacteria (2)	18.0036	16.2587
LR890752.1	0.020747	0	478	3	circular	2020-10-30								IncFIB(K)(pCAV1099-114)_1, CP011596,	IncF RST(F-:A-:B-):FIA(-);FIB(-);FIC(-);FII(-);FIIK(-);FIIS(-);FIIY(-)	174054	49.5381	Klebsiella pneumoniae	Klebsiella pneumoniae (573)	Klebsiella (570)	Enterobacteriaceae (543)	Enterobacterales (91347)	Gammaproteobacteria (1236)	Proteobacteria (1224)	Bacteria (2)	5.1925	7.94397
NZ_LC549807.1	0.0231524	0	444	4	circular	2020-08-04	Viet Nam:Ho Chi Minh		11	107		Homo sapiens		IncFIB(K)(pCAV1099-114)_1, CP011596, |IncHI1B(pNDM-MAR)_1, JN420336, |IncFII(K)_1, CP000648,	IncF RST(K2:A-:B-):FIA(-);FIB(-);FIC(-);FII(-);FIIK(2);FIIS(-);FIIY(-)|IncHI1 MLST(-):HCM1_043(-);HCM1_064(-);HCM1_099(-);HCM1_116(-);HCM1_178ac(-);HCM1_259(-);(-)	298683	51.0454	Klebsiella pneumoniae	Klebsiella pneumoniae (573)	Klebsiella (570)	Enterobacteriaceae (543)	Enterobacterales (91347)	Gammaproteobacteria (1236)	Proteobacteria (1224)	Bacteria (2)	5.32744	7.89478
NZ_CP035203.1	0.0244475	0	427	5	circular	2019-10-31	Laos		19.52	102.1	stool	Homo sapiens		IncFIB(K)(pCAV1099-114)_1, CP011596,	IncF RST(F-:A-:B-):FIA(-);FIB(-);FIC(-);FII(-);FIIK(-);FIIS(-);FIIY(-)	202829	49.4619	Klebsiella pneumoniae	Klebsiella pneumoniae (573)	Klebsiella (570)	Enterobacteriaceae (543)	Enterobacterales (91347)	Gammaproteobacteria (1236)	Proteobacteria (1224)	Bacteria (2)	5.1826	7.9194
NZ_MT549899.1	0.0272504	0	393	6	circular	2020-11-04								IncFIB(K)(pCAV1099-114)_1, CP011596,	IncF RST(F-:A-:B-):FIA(-);FIB(-);FIC(-);FII(-);FIIK(-);FIIS(-);FIIY(-)	113128	50.4411	Klebsiella quasipneumoniae	Klebsiella quasipneumoniae (1463165)	Klebsiella (570)	Enterobacteriaceae (543)	Enterobacterales (91347)	Gammaproteobacteria (1236)	Proteobacteria (1224)	Bacteria (2)	5.23936	7.94022
NZ_CP031815.1	0.0278663	0	386	7	circular	2018-09-02								IncFIB(K)(pCAV1099-114)_1, CP011596,	IncF RST(F-:A-:B-):FIA(-);FIB(-);FIC(-);FII(-);FIIK(-);FIIS(-);FIIY(-)	139276	49.9433	Klebsiella pneumoniae	Klebsiella pneumoniae (573)	Klebsiella (570)	Enterobacteriaceae (543)	Enterobacterales (91347)	Gammaproteobacteria (1236)	Proteobacteria (1224)	Bacteria (2)	5.19415	7.91655
NZ_AP019689.1	0.0317837	0	345	8	circular	2019-10-14	not applicable							IncFIB(K)(pCAV1099-114)_1, CP011596,	IncF RST(F-:A-:B-):FIA(-);FIB(-);FIC(-);FII(-);FIIK(-);FIIS(-);FIIY(-)	181469	50.3651	Klebsiella quasipneumoniae	Klebsiella quasipneumoniae (1463165)	Klebsiella (570)	Enterobacteriaceae (543)	Enterobacterales (91347)	Gammaproteobacteria (1236)	Proteobacteria (1224)	Bacteria (2)	5.18131	7.95185
NZ_CP062987.1	0.0325113	0	338	9	circular	2020-10-13	Russia: Moscow		55.76	37.62	traumatic discharge	Homo sapiens		IncFIB(K)(pCAV1099-114)_1, CP011596, |IncHI1B(pNDM-MAR)_1, JN420336,	IncF RST(F-:A-:B-):FIA(-);FIB(-);FIC(-);FII(-);FIIK(-);FIIS(-);FIIY(-)|IncHI1 MLST(-):HCM1_043(-);HCM1_064(-);HCM1_099(-);HCM1_116(-);HCM1_178ac(-);HCM1_259(-);(-)	146591	50.5795	Klebsiella pneumoniae	Klebsiella pneumoniae (573)	Klebsiella (570)	Enterobacteriaceae (543)	Enterobacterales (91347)	Gammaproteobacteria (1236)	Proteobacteria (1224)	Bacteria (2)	5.09305	7.97107
NZ_MT570100.1	0.0358575	0	308	10	circular	2020-11-04								IncFIB(K)(pCAV1099-114)_1, CP011596,	IncF RST(F-:A-:B-):FIA(-);FIB(-);FIC(-);FII(-);FIIK(-);FIIS(-);FIIY(-)	236698	50.1377	Klebsiella quasipneumoniae	Klebsiella quasipneumoniae (1463165)	Klebsiella (570)	Enterobacteriaceae (543)	Enterobacterales (91347)	Gammaproteobacteria (1236)	Proteobacteria (1224)	Bacteria (2)	5.21299	7.93807
NZ_CP023917.1	0.0369409	0	299	11	circular	2017-10-20	Canada:BC	Canada,BC	55.0013	-125.002	urine	Homo sapiens		IncFIB(K)(pCAV1099-114)_1, CP011596, |IncHI1B(pNDM-MAR)_1, JN420336,	IncF RST(F-:A-:B-):FIA(-);FIB(-);FIC(-);FII(-);FIIK(-);FIIS(-);FIIY(-)|IncHI1 MLST(-):HCM1_043(-);HCM1_064(-);HCM1_099(-);HCM1_116(-);HCM1_178ac(-);HCM1_259(-);(-)	164607	49.6923	Klebsiella pneumoniae	Klebsiella pneumoniae (573)	Klebsiella (570)	Enterobacteriaceae (543)	Enterobacterales (91347)	Gammaproteobacteria (1236)	Proteobacteria (1224)	Bacteria (2)	5.1444	7.92901
NZ_CP031563.1	0.0430292	0	254	12	circular	2019-02-15	China:Shandong province, hospital	China,Shandong province,hospital	36.3732	116.524	cancer patient stool	pneumoniae	whole organism	IncFIB(K)(pCAV1099-114)_1, CP011596, |IncHI1B(pNDM-MAR)_1, JN420336,	IncF RST(F-:A-:B-):FIA(-);FIB(-);FIC(-);FII(-);FIIK(-);FIIS(-);FIIY(-)|IncHI1 MLST(-):HCM1_043(-);HCM1_064(-);HCM1_099(-);HCM1_116(-);HCM1_178ac(-);HCM1_259(-);(-)	245534	51.4295	Klebsiella pneumoniae	Klebsiella pneumoniae (573)	Klebsiella (570)	Enterobacteriaceae (543)	Enterobacterales (91347)	Gammaproteobacteria (1236)	Proteobacteria (1224)	Bacteria (2)	5.16281	8.00525
NZ_CP063901.1	0.0444041	0	245	13	circular	2020-11-10	China:Tangshan		39.36	118.11	Human fecal samples			IncFIB(K)(pCAV1099-114)_1, CP011596, |IncHI1B(pNDM-MAR)_1, JN420336,	IncF RST(F-:A-:B-):FIA(-);FIB(-);FIC(-);FII(-);FIIK(-);FIIS(-);FIIY(-)|IncHI1 MLST(-):HCM1_043(-);HCM1_064(-);HCM1_099(-);HCM1_116(-);HCM1_178ac(-);HCM1_259(-);(-)	176438	49.9252	Klebsiella quasipneumoniae	Klebsiella quasipneumoniae (1463165)	Klebsiella (570)	Enterobacteriaceae (543)	Enterobacterales (91347)	Gammaproteobacteria (1236)	Proteobacteria (1224)	Bacteria (2)	5.18348	7.9063
NZ_CP031736.1	0.0445606	0	244	14	circular	2018-09-02	Korea: Seoul		37.4981	127.076	blood	Homo sapiens		IncHI1B(pNDM-MAR)_1, JN420336, |IncFIB(pNDM-Mar)_1, JN420336,	IncHI1 MLST(-):HCM1_043(-);HCM1_064(-);HCM1_099(-);HCM1_116(-);HCM1_178ac(-);HCM1_259(-);(-)|IncF RST(F-:A-:B-):FIA(-);FIB(-);FIC(-);FII(-);FIIK(-);FIIS(-);FIIY(-)	250351	46.3925	Klebsiella pneumoniae subsp. pneumoniae	Klebsiella pneumoniae (573)	Klebsiella (570)	Enterobacteriaceae (543)	Enterobacterales (91347)	Gammaproteobacteria (1236)	Proteobacteria (1224)	Bacteria (2)	15.6622	-0.0722351
NZ_CP045675.1	0.0447178	0	243	15	circular	2020-01-17	China		30.26	120.2	rectum	Homo sapiens		repB_KLEB_VIR, AP006726, |IncHI1B(pNDM-MAR)_1, JN420336,	IncHI1 MLST(-):HCM1_043(-);HCM1_064(-);HCM1_099(-);HCM1_116(-);HCM1_178ac(-);HCM1_259(-);(-)	177848	50.4897	Klebsiella pneumoniae	Klebsiella pneumoniae (573)	Klebsiella (570)	Enterobacteriaceae (543)	Enterobacterales (91347)	Gammaproteobacteria (1236)	Proteobacteria (1224)	Bacteria (2)	15.1221	1.13876
NZ_CP050844.1	0.0455159	0	238	16	circular	2020-04-09	China: Hebei		39.83	119.48	milk			IncFIB(K)(pCAV1099-114)_1, CP011596,	IncF RST(F-:A-:B-):FIA(-);FIB(-);FIC(-);FII(-);FIIK(-);FIIS(-);FIIY(-)	223022	49.8987	Klebsiella pneumoniae	Klebsiella pneumoniae (573)	Klebsiella (570)	Enterobacteriaceae (543)	Enterobacterales (91347)	Gammaproteobacteria (1236)	Proteobacteria (1224)	Bacteria (2)	5.16908	7.95846
NZ_CP063014.1	0.045678	0	237	17	circular	2020-10-13	Russia: Moscow		55.76	37.62	urine	Homo sapiens		IncFIB(K)(pCAV1099-114)_1, CP011596, |IncFIA(HI1)_1, AF250878, |IncHI1B(pNDM-MAR)_1, JN420336,	IncF RST(F-:A22:B-):FIA(22);FIB(-);FIC(-);FII(-);FIIK(-);FIIS(-);FIIY(-)|IncHI1 MLST(-):HCM1_043(-);HCM1_064(-);HCM1_099(-);HCM1_116(-);HCM1_178ac(-);HCM1_259(-);(-)	210662	49.5832	Klebsiella pneumoniae	Klebsiella pneumoniae (573)	Klebsiella (570)	Enterobacteriaceae (543)	Enterobacterales (91347)	Gammaproteobacteria (1236)	Proteobacteria (1224)	Bacteria (2)	5.16592	7.93412
MK649822.1	0.0460045	0	235	18	circular	2019-10-12								repB_KLEB_VIR, AP006726, |IncHI1B(pNDM-MAR)_1, JN420336,	IncHI1 MLST(-):HCM1_043(-);HCM1_064(-);HCM1_099(-);HCM1_116(-);HCM1_178ac(-);HCM1_259(-);(-)	182805	50.3668	Klebsiella pneumoniae	Klebsiella pneumoniae (573)	Klebsiella (570)	Enterobacteriaceae (543)	Enterobacterales (91347)	Gammaproteobacteria (1236)	Proteobacteria (1224)	Bacteria (2)	15.1868	1.07986
NZ_CP044036.1	0.0460045	0	235	19	circular	2019-09-27	USA: MI	USA,MI	43.6212	-84.6824	clinical isolate	Homo sapiens		IncHI1B(pNDM-MAR)_1, JN420336, |IncFIB(K)(pCAV1099-114)_1, CP011596,	IncHI1 MLST(-):HCM1_043(-);HCM1_064(-);HCM1_099(-);HCM1_116(-);HCM1_178ac(-);HCM1_259(-);(-)|IncF RST(F-:A-:B-):FIA(-);FIB(-);FIC(-);FII(-);FIIK(-);FIIS(-);FIIY(-)	151028	49.806	Klebsiella pneumoniae	Klebsiella pneumoniae (573)	Klebsiella (570)	Enterobacteriaceae (543)	Enterobacterales (91347)	Gammaproteobacteria (1236)	Proteobacteria (1224)	Bacteria (2)	5.16295	7.91633
NZ_CP060050.1	0.0460045	0	235	20	circular	2020-10-01	Israel		31.04	34.85	rectal	Homo sapiens		IncFIB(K)(pCAV1099-114)_1, CP011596,	IncF RST(F-:A-:B-):FIA(-);FIB(-);FIC(-);FII(-);FIIK(-);FIIS(-);FIIY(-)	199783	50.2846	Klebsiella pneumoniae	Klebsiella pneumoniae (573)	Klebsiella (570)	Enterobacteriaceae (543)	Enterobacterales (91347)	Gammaproteobacteria (1236)	Proteobacteria (1224)	Bacteria (2)	5.16731	7.92875
NZ_CP037442.1	0.0463343	0	233	21	circular	2019-03-05	Nigeria	Nigeria	9.60004	7.99997	blood	Homo sapiens		IncFIB(K)(pCAV1099-114)_1, CP011596, |IncHI1B(pNDM-MAR)_1, JN420336,	IncF RST(F-:A-:B-):FIA(-);FIB(-);FIC(-);FII(-);FIIK(-);FIIS(-);FIIY(-)|IncHI1 MLST(-):HCM1_043(-);HCM1_064(-);HCM1_099(-);HCM1_116(-);HCM1_178ac(-);HCM1_259(-);(-)	204467	51.9047	Klebsiella sp. PO552	Klebsiella sp. PO552 (1972757)	Klebsiella (570)	Enterobacteriaceae (543)	Enterobacterales (91347)	Gammaproteobacteria (1236)	Proteobacteria (1224)	Bacteria (2)	5.15074	7.92965
NZ_CP042482.1	0.0465005	0	232	22	circular	2019-10-13	Australia: Sydney	Australia,Sydney	-33.8548	151.216	clinical sample	Homo sapiens	Whole organism	IncFIB(K)(pCAV1099-114)_1, CP011596, |IncHI1B(pNDM-MAR)_1, JN420336,	IncF RST(F-:A-:B-):FIA(-);FIB(-);FIC(-);FII(-);FIIK(-);FIIS(-);FIIY(-)|IncHI1 MLST(-):HCM1_043(-);HCM1_064(-);HCM1_099(-);HCM1_116(-);HCM1_178ac(-);HCM1_259(-);(-)	216942	51.1173	Klebsiella pneumoniae	Klebsiella pneumoniae (573)	Klebsiella (570)	Enterobacteriaceae (543)	Enterobacterales (91347)	Gammaproteobacteria (1236)	Proteobacteria (1224)	Bacteria (2)	5.18615	7.89666
CP052329.1	0.0468354	0	230	23	circular	2020-05-04	South Korea: Chungbuk		36.8	127.7	blood	Homo sapiens		IncFIB(K)(pCAV1099-114)_1, CP011596, |IncHI1B(pNDM-MAR)_1, JN420336,	IncF RST(F-:A-:B-):FIA(-);FIB(-);FIC(-);FII(-);FIIK(-);FIIS(-);FIIY(-)|IncHI1 MLST(-):HCM1_043(-);HCM1_064(-);HCM1_099(-);HCM1_116(-);HCM1_178ac(-);HCM1_259(-);(-)	147293	50.8551	Klebsiella pneumoniae	Klebsiella pneumoniae (573)	Klebsiella (570)	Enterobacteriaceae (543)	Enterobacterales (91347)	Gammaproteobacteria (1236)	Proteobacteria (1224)	Bacteria (2)	5.21737	7.90508
NZ_CP014778.1	0.0478612	0	224	24	circular	2020-04-20	Malaysia	Malaysia	4.08921	100.563	Fish ball		missing	IncFIB(K)(pCAV1099-114)_1, CP011596,	IncF RST(F-:A-:B-):FIA(-);FIB(-);FIC(-);FII(-);FIIK(-);FIIS(-);FIIY(-)	140505	50.6779	Pluralibacter gergoviae	Pluralibacter gergoviae (61647)	Pluralibacter (1330546)	Enterobacteriaceae (543)	Enterobacterales (91347)	Gammaproteobacteria (1236)	Proteobacteria (1224)	Bacteria (2)	5.17957	7.85959
NZ_CP050830.1	0.0482105	0	222	25	circular	2020-04-09	China: Shandong		37.1	122.25	milk			IncFIB(K)(pCAV1099-114)_1, CP011596,	IncF RST(F-:A-:B-):FIA(-);FIB(-);FIC(-);FII(-);FIIK(-);FIIS(-);FIIY(-)	222783	50.046	Klebsiella pneumoniae	Klebsiella pneumoniae (573)	Klebsiella (570)	Enterobacteriaceae (543)	Enterobacterales (91347)	Gammaproteobacteria (1236)	Proteobacteria (1224)	Bacteria (2)	5.17263	7.96429
NZ_CP045194.1	0.0489202	0	218	26	circular	2020-01-17	China		30.26	120.2	rectum	Homo sapiens		IncFIB(K)(pCAV1099-114)_1, CP011596,	IncF RST(F-:A-:B-):FIA(-);FIB(-);FIC(-);FII(-);FIIK(-);FIIS(-);FIIY(-)	232148	50.9679	Klebsiella pneumoniae	Klebsiella pneumoniae (573)	Klebsiella (570)	Enterobacteriaceae (543)	Enterobacterales (91347)	Gammaproteobacteria (1236)	Proteobacteria (1224)	Bacteria (2)	5.15536	7.97293
NZ_CP063216.1	0.0494626	0	215	27	circular	2020-11-04	Hong Kong	Hong Kong	22.3506	114.185		Homo sapiens	whole organism	IncFIB(K)(pCAV1099-114)_1, CP011596, |IncHI1B(pNDM-MAR)_1, JN420336,	IncF RST(F-:A-:B-):FIA(-);FIB(-);FIC(-);FII(-);FIIK(-);FIIS(-);FIIY(-)|IncHI1 MLST(-):HCM1_043(-);HCM1_064(-);HCM1_099(-);HCM1_116(-);HCM1_178ac(-);HCM1_259(-);(-)	273789	51.4813	Klebsiella pneumoniae	Klebsiella pneumoniae (573)	Klebsiella (570)	Enterobacteriaceae (543)	Enterobacterales (91347)	Gammaproteobacteria (1236)	Proteobacteria (1224)	Bacteria (2)	5.13228	8.01954
NZ_CP023479.1	0.0501998	0	211	28	circular	2018-03-29	Brazil: City of Belo Horizonte, State of Minas Gerais		-19.9208	-43.9378	tracheal secretion isolated from an uncertain age woman	Homo sapiens	whole organism	IncFIB(K)(pCAV1099-114)_1, CP011596,	IncF RST(F-:A-:B-):FIA(-);FIB(-);FIC(-);FII(-);FIIK(-);FIIS(-);FIIY(-)	189707	50.7145	Klebsiella quasipneumoniae	Klebsiella quasipneumoniae (1463165)	Klebsiella (570)	Enterobacteriaceae (543)	Enterobacterales (91347)	Gammaproteobacteria (1236)	Proteobacteria (1224)	Bacteria (2)	5.32875	7.84956
NZ_CP013713.1	0.0503867	0	210	29	circular	2015-12-31	China: Harbin	China,Harbin	45.7657	126.616	the activated sludge of Harbin Taiping wastewater treatment plant		whole oragnism	IncHI1B(pNDM-MAR)_1, JN420336, |IncFIB(K)(pCAV1099-114)_1, CP011596,	IncHI1 MLST(-):HCM1_043(-);HCM1_064(-);HCM1_099(-);HCM1_116(-);HCM1_178ac(-);HCM1_259(-);(-)|IncF RST(F-:A-:B-):FIA(-);FIB(-);FIC(-);FII(-);FIIK(-);FIIS(-);FIIY(-)	53400	49.7697	Klebsiella pneumoniae	Klebsiella pneumoniae (573)	Klebsiella (570)	Enterobacteriaceae (543)	Enterobacterales (91347)	Gammaproteobacteria (1236)	Proteobacteria (1224)	Bacteria (2)	5.1332	7.97028
NZ_CP046613.1	0.0505746	0	209	30	circular	2019-12-18	not applicable				sputum	Homo sapiens		IncFIB(K)(pCAV1099-114)_1, CP011596,	IncF RST(F-:A-:B-):FIA(-);FIB(-);FIC(-);FII(-);FIIK(-);FIIS(-);FIIY(-)	237090	51.693	Klebsiella pneumoniae	Klebsiella pneumoniae (573)	Klebsiella (570)	Enterobacteriaceae (543)	Enterobacterales (91347)	Gammaproteobacteria (1236)	Proteobacteria (1224)	Bacteria (2)	5.14854	7.97771
NZ_CP024875.1	0.051337	0	205	31	circular	2018-04-11	Thailand		18	100	sputum	Homo sapiens		IncHI1B(pNDM-MAR)_1, JN420336, |IncFIB(K)(pCAV1099-114)_1, CP011596,	IncHI1 MLST(-):HCM1_043(-);HCM1_064(-);HCM1_099(-);HCM1_116(-);HCM1_178ac(-);HCM1_259(-);(-)|IncF RST(F-:A-:B-):FIA(-);FIB(-);FIC(-);FII(-);FIIK(-);FIIS(-);FIIY(-)	227692	51.3817	Klebsiella pneumoniae	Klebsiella pneumoniae (573)	Klebsiella (570)	Enterobacteriaceae (543)	Enterobacterales (91347)	Gammaproteobacteria (1236)	Proteobacteria (1224)	Bacteria (2)	5.15559	7.97757
NZ_CP050836.1	0.0515304	0	204	32	circular	2020-04-09	China: Jiangxi		30.7	118.4	milk			IncFIB(K)(pCAV1099-114)_1, CP011596, |IncHI1B(pNDM-MAR)_1, JN420336,	IncF RST(F-:A-:B-):FIA(-);FIB(-);FIC(-);FII(-);FIIK(-);FIIS(-);FIIY(-)|IncHI1 MLST(-):HCM1_043(-);HCM1_064(-);HCM1_099(-);HCM1_116(-);HCM1_178ac(-);HCM1_259(-);(-)	237942	51.4415	Klebsiella pneumoniae	Klebsiella pneumoniae (573)	Klebsiella (570)	Enterobacteriaceae (543)	Enterobacterales (91347)	Gammaproteobacteria (1236)	Proteobacteria (1224)	Bacteria (2)	5.16306	7.97884
NZ_CP033758.1	0.0517248	0	203	33	linear	2018-11-26	Unknown				UCC isolate	Homo sapiens		IncFIB(K)(pCAV1099-114)_1, CP011596,	IncF RST(F-:A-:B-):FIA(-);FIB(-);FIC(-);FII(-);FIIK(-);FIIS(-);FIIY(-)	232752	50.9362	Klebsiella pneumoniae	Klebsiella pneumoniae (573)	Klebsiella (570)	Enterobacteriaceae (543)	Enterobacterales (91347)	Gammaproteobacteria (1236)	Proteobacteria (1224)	Bacteria (2)	5.19777	7.88297
NZ_CP021697.1	0.0517248	0	203	34	circular	2017-06-10	missing				missing	missing		IncFIB(K)(pCAV1099-114)_1, CP011596,	IncF RST(F-:A-:B-):FIA(-);FIB(-);FIC(-);FII(-);FIIK(-);FIIS(-);FIIY(-)	191266	49.7809	Klebsiella pneumoniae	Klebsiella pneumoniae (573)	Klebsiella (570)	Enterobacteriaceae (543)	Enterobacterales (91347)	Gammaproteobacteria (1236)	Proteobacteria (1224)	Bacteria (2)	5.15732	8.00255
LR890318.1	0.0519203	0	202	35	circular	2020-10-30								IncFIB(K)(pCAV1099-114)_1, CP011596,	IncF RST(F-:A-:B-):FIA(-);FIB(-);FIC(-);FII(-);FIIK(-);FIIS(-);FIIY(-)	226712	50.8191	Klebsiella pneumoniae	Klebsiella pneumoniae (573)	Klebsiella (570)	Enterobacteriaceae (543)	Enterobacterales (91347)	Gammaproteobacteria (1236)	Proteobacteria (1224)	Bacteria (2)	5.16987	8.001
CP063877.1	0.0523149	0	200	36	circular	2020-11-08	China:Shenzhen		22.32	114.03	Manis javanica			IncQ1_1, M28829, |IncHI1B(pNDM-MAR)_1, JN420336, |IncFIB(K)(pCAV1099-114)_1, CP011596,	IncHI1 MLST(-):HCM1_043(-);HCM1_064(-);HCM1_099(-);HCM1_116(-);HCM1_178ac(-);HCM1_259(-);(-)|IncF RST(F-:A-:B-):FIA(-);FIB(-);FIC(-);FII(-);FIIK(-);FIIS(-);FIIY(-)	159310	50.8279	Klebsiella quasipneumoniae	Klebsiella quasipneumoniae (1463165)	Klebsiella (570)	Enterobacteriaceae (543)	Enterobacterales (91347)	Gammaproteobacteria (1236)	Proteobacteria (1224)	Bacteria (2)	5.14747	7.95702
NZ_CP034138.1	0.0525139	0	199	37	circular	2018-11-27	Nigeria	Nigeria	9.60004	7.99997	blood	Homo sapiens		IncFIB(K)(pCAV1099-114)_1, CP011596,	IncF RST(F-:A-:B-):FIA(-);FIB(-);FIC(-);FII(-);FIIK(-);FIIS(-);FIIY(-)	218944	50.7143	Klebsiella quasipneumoniae subsp. similipneumoniae	Klebsiella quasipneumoniae (1463165)	Klebsiella (570)	Enterobacteriaceae (543)	Enterobacterales (91347)	Gammaproteobacteria (1236)	Proteobacteria (1224)	Bacteria (2)	5.46501	7.82329
NZ_CP034130.1	0.0525139	0	199	38	circular	2018-11-27	Nigeria	Nigeria	9.60004	7.99997	blood	Homo sapiens		IncFIB(K)(pCAV1099-114)_1, CP011596,	IncF RST(F-:A-:B-):FIA(-);FIB(-);FIC(-);FII(-);FIIK(-);FIIS(-);FIIY(-)	218935	50.7151	Klebsiella quasipneumoniae	Klebsiella quasipneumoniae (1463165)	Klebsiella (570)	Enterobacteriaceae (543)	Enterobacterales (91347)	Gammaproteobacteria (1236)	Proteobacteria (1224)	Bacteria (2)	5.50065	7.80518
NZ_CP023417.1	0.0525139	0	199	39	circular	2018-09-08	Spain: Madrid	Spain,Madrid	40.4167	-3.70358	hospital	Homo sapiens	Bilis	IncFIB(K)(pCAV1099-114)_1, CP011596,	IncF RST(F-:A-:B-):FIA(-);FIB(-);FIC(-);FII(-);FIIK(-);FIIS(-);FIIY(-)	311641	50.2286	Klebsiella pneumoniae	Klebsiella pneumoniae (573)	Klebsiella (570)	Enterobacteriaceae (543)	Enterobacterales (91347)	Gammaproteobacteria (1236)	Proteobacteria (1224)	Bacteria (2)	5.17725	7.90903
NZ_CP040534.1	0.0529154	0	197	40	circular	2019-05-29	China	China	34.4118	86.0327		Homo sapiens		repB_KLEB_VIR, AP006726, |IncHI1B(pNDM-MAR)_1, JN420336,	IncHI1 MLST(-):HCM1_043(-);HCM1_064(-);HCM1_099(-);HCM1_116(-);HCM1_178ac(-);HCM1_259(-);(-)	177790	50.4567	Klebsiella pneumoniae	Klebsiella pneumoniae (573)	Klebsiella (570)	Enterobacteriaceae (543)	Enterobacterales (91347)	Gammaproteobacteria (1236)	Proteobacteria (1224)	Bacteria (2)	4.83724	8.1766
NZ_CP040540.1	0.0529154	0	197	41	circular	2019-05-29	China	China	34.4118	86.0327		Homo sapiens		repB_KLEB_VIR, AP006726, |IncHI1B(pNDM-MAR)_1, JN420336,	IncHI1 MLST(-):HCM1_043(-);HCM1_064(-);HCM1_099(-);HCM1_116(-);HCM1_178ac(-);HCM1_259(-);(-)	178154	50.4906	Klebsiella pneumoniae	Klebsiella pneumoniae (573)	Klebsiella (570)	Enterobacteriaceae (543)	Enterobacterales (91347)	Gammaproteobacteria (1236)	Proteobacteria (1224)	Bacteria (2)	4.82478	8.16731
NZ_CP040546.1	0.0529154	0	197	42	circular	2019-05-29	China	China	34.4118	86.0327		Homo sapiens		repB_KLEB_VIR, AP006726, |IncHI1B(pNDM-MAR)_1, JN420336,	IncHI1 MLST(-):HCM1_043(-);HCM1_064(-);HCM1_099(-);HCM1_116(-);HCM1_178ac(-);HCM1_259(-);(-)	177694	50.4513	Klebsiella pneumoniae	Klebsiella pneumoniae (573)	Klebsiella (570)	Enterobacteriaceae (543)	Enterobacterales (91347)	Gammaproteobacteria (1236)	Proteobacteria (1224)	Bacteria (2)	4.8313	8.17228
NZ_MK773537.1	0.0537328	0	193	43	circular	2020-06-04								IncFIB(K)(pCAV1099-114)_1, CP011596,	IncF RST(F-:A-:B-):FIA(-);FIB(-);FIC(-);FII(-);FIIK(-);FIIS(-);FIIY(-)	214358	50.9358	Klebsiella pneumoniae	Klebsiella pneumoniae (573)	Klebsiella (570)	Enterobacteriaceae (543)	Enterobacterales (91347)	Gammaproteobacteria (1236)	Proteobacteria (1224)	Bacteria (2)	5.13888	7.97679
NZ_CP031809.1	0.054149	0	191	44	circular	2018-09-02								IncFIB(K)(pCAV1099-114)_1, CP011596,	IncF RST(F-:A-:B-):FIA(-);FIB(-);FIC(-);FII(-);FIIK(-);FIIS(-);FIIY(-)	233468	51.0524	Klebsiella pneumoniae	Klebsiella pneumoniae (573)	Klebsiella (570)	Enterobacteriaceae (543)	Enterobacterales (91347)	Gammaproteobacteria (1236)	Proteobacteria (1224)	Bacteria (2)	5.17742	7.96829
NZ_CP043934.1	0.0543589	0	190	45	circular	2019-09-24	China	China	34.4118	86.0327		chicken	single cell	IncFIB(K)(pCAV1099-114)_1, CP011596,	IncF RST(F-:A-:B-):FIA(-);FIB(-);FIC(-);FII(-);FIIK(-);FIIS(-);FIIY(-)	172565	50.2303	Klebsiella pneumoniae	Klebsiella pneumoniae (573)	Klebsiella (570)	Enterobacteriaceae (543)	Enterobacterales (91347)	Gammaproteobacteria (1236)	Proteobacteria (1224)	Bacteria (2)	5.14079	7.9594
NZ_MK347238.1	0.0545702	0	189	46	circular	2020-08-04								repB_KLEB_VIR, AP006726, |IncHI1B(pNDM-MAR)_1, JN420336,	IncHI1 MLST(-):HCM1_043(-);HCM1_064(-);HCM1_099(-);HCM1_116(-);HCM1_178ac(-);HCM1_259(-);(-)	178156	50.5422	Klebsiella pneumoniae	Klebsiella pneumoniae (573)	Klebsiella (570)	Enterobacteriaceae (543)	Enterobacterales (91347)	Gammaproteobacteria (1236)	Proteobacteria (1224)	Bacteria (2)	4.86058	8.15041
NZ_CP050827.1	0.0547827	0	188	47	circular	2020-04-08	China: Anhui		32.63	117.05	milk			IncHI1B(pNDM-MAR)_1, JN420336, |IncFIB(K)(pCAV1099-114)_1, CP011596,	IncHI1 MLST(-):HCM1_043(-);HCM1_064(-);HCM1_099(-);HCM1_116(-);HCM1_178ac(-);HCM1_259(-);(-)|IncF RST(F-:A-:B-):FIA(-);FIB(-);FIC(-);FII(-);FIIK(-);FIIS(-);FIIY(-)	186278	50.3307	Klebsiella pneumoniae	Klebsiella pneumoniae (573)	Klebsiella (570)	Enterobacteriaceae (543)	Enterobacterales (91347)	Gammaproteobacteria (1236)	Proteobacteria (1224)	Bacteria (2)	5.15467	7.95479
NZ_CP050156.1	0.0549966	0	187	48	circular	2020-07-31	Hong Kong	Hong Kong	22.3506	114.185	central_venous_catheter	Homo sapiens		IncHI1B(pNDM-MAR)_1, JN420336,	IncHI1 MLST(-):HCM1_043(-);HCM1_064(-);HCM1_099(-);HCM1_116(-);HCM1_178ac(-);HCM1_259(-);(-)	259659	46.3808	Klebsiella pneumoniae	Klebsiella pneumoniae (573)	Klebsiella (570)	Enterobacteriaceae (543)	Enterobacterales (91347)	Gammaproteobacteria (1236)	Proteobacteria (1224)	Bacteria (2)	15.661	-0.0720748
NZ_MK347232.1	0.0549966	0	187	49	circular	2020-08-04								repB_KLEB_VIR, AP006726, |IncHI1B(pNDM-MAR)_1, JN420336,	IncHI1 MLST(-):HCM1_043(-);HCM1_064(-);HCM1_099(-);HCM1_116(-);HCM1_178ac(-);HCM1_259(-);(-)	178605	50.5372	Klebsiella pneumoniae	Klebsiella pneumoniae (573)	Klebsiella (570)	Enterobacteriaceae (543)	Enterobacterales (91347)	Gammaproteobacteria (1236)	Proteobacteria (1224)	Bacteria (2)	4.84997	8.16372
NZ_MK347236.1	0.0549966	0	187	50	circular	2020-08-04								repB_KLEB_VIR, AP006726, |IncHI1B(pNDM-MAR)_1, JN420336,	IncHI1 MLST(-):HCM1_043(-);HCM1_064(-);HCM1_099(-);HCM1_116(-);HCM1_178ac(-);HCM1_259(-);(-)	178421	50.5025	Klebsiella pneumoniae	Klebsiella pneumoniae (573)	Klebsiella (570)	Enterobacteriaceae (543)	Enterobacterales (91347)	Gammaproteobacteria (1236)	Proteobacteria (1224)	Bacteria (2)	4.84113	8.15562
NZ_CP029739.1	0.0549966	0	187	51	circular	2018-06-16	missing				missing	missing		IncFIB(K)(pCAV1099-114)_1, CP011596,	IncF RST(F-:A-:B-):FIA(-);FIB(-);FIC(-);FII(-);FIIK(-);FIIS(-);FIIY(-)	175746	50.268	Klebsiella pneumoniae	Klebsiella pneumoniae (573)	Klebsiella (570)	Enterobacteriaceae (543)	Enterobacterales (91347)	Gammaproteobacteria (1236)	Proteobacteria (1224)	Bacteria (2)	5.13782	7.99417
NZ_CP009865.1	0.0552118	0	186	52	circular	2015-01-21	USA	USA	39.7837	-100.446	perirectal swab		missing	IncFIB(K)(pCAV1099-114)_1, CP011596, |IncHI1B(pNDM-MAR)_1, JN420336,	IncF RST(F-:A-:B-):FIA(-);FIB(-);FIC(-);FII(-);FIIK(-);FIIS(-);FIIY(-)|IncHI1 MLST(-):HCM1_043(-);HCM1_064(-);HCM1_099(-);HCM1_116(-);HCM1_178ac(-);HCM1_259(-);(-)	159360	51.4163	Klebsiella pneumoniae subsp. pneumoniae	Klebsiella pneumoniae (573)	Klebsiella (570)	Enterobacteriaceae (543)	Enterobacterales (91347)	Gammaproteobacteria (1236)	Proteobacteria (1224)	Bacteria (2)	5.15623	7.92324
NZ_MK347227.1	0.0552118	0	186	53	circular	2020-08-04								repB_KLEB_VIR, AP006726, |IncHI1B(pNDM-MAR)_1, JN420336,	IncHI1 MLST(-):HCM1_043(-);HCM1_064(-);HCM1_099(-);HCM1_116(-);HCM1_178ac(-);HCM1_259(-);(-)	178537	50.4921	Klebsiella pneumoniae	Klebsiella pneumoniae (573)	Klebsiella (570)	Enterobacteriaceae (543)	Enterobacterales (91347)	Gammaproteobacteria (1236)	Proteobacteria (1224)	Bacteria (2)	4.84181	8.15733
NZ_MK347235.1	0.0552118	0	186	54	circular	2020-08-04								repB_KLEB_VIR, AP006726, |IncHI1B(pNDM-MAR)_1, JN420336,	IncHI1 MLST(-):HCM1_043(-);HCM1_064(-);HCM1_099(-);HCM1_116(-);HCM1_178ac(-);HCM1_259(-);(-)	177714	50.4693	Klebsiella pneumoniae	Klebsiella pneumoniae (573)	Klebsiella (570)	Enterobacteriaceae (543)	Enterobacterales (91347)	Gammaproteobacteria (1236)	Proteobacteria (1224)	Bacteria (2)	4.8477	8.16141
NZ_CP030270.1	0.0554283	0	185	55	circular	2018-07-12	China	China	34.4118	86.0327	missing	Homo sapiens		repB_KLEB_VIR, AP006726,		236809	49.996	Klebsiella pneumoniae subsp. pneumoniae	Klebsiella pneumoniae (573)	Klebsiella (570)	Enterobacteriaceae (543)	Enterobacterales (91347)	Gammaproteobacteria (1236)	Proteobacteria (1224)	Bacteria (2)	15.3262	0.942137
NZ_MN099026.1	0.0554283	0	185	56	circular	2020-08-04								IncFIB(K)(pCAV1099-114)_1, CP011596, |IncHI1B(pNDM-MAR)_1, JN420336,	IncF RST(F-:A-:B-):FIA(-);FIB(-);FIC(-);FII(-);FIIK(-);FIIS(-);FIIY(-)|IncHI1 MLST(-):HCM1_043(-);HCM1_064(-);HCM1_099(-);HCM1_116(-);HCM1_178ac(-);HCM1_259(-);(-)	256606	50.8468	Klebsiella pneumoniae	Klebsiella pneumoniae (573)	Klebsiella (570)	Enterobacteriaceae (543)	Enterobacterales (91347)	Gammaproteobacteria (1236)	Proteobacteria (1224)	Bacteria (2)	5.14073	8.02927
NZ_MN783747.1	0.0556462	0	184	57	circular	2020-08-04								IncFIB(K)(pCAV1099-114)_1, CP011596,	IncF RST(F-:A-:B-):FIA(-);FIB(-);FIC(-);FII(-);FIIK(-);FIIS(-);FIIY(-)	170091	49.7786	Klebsiella oxytoca	Klebsiella oxytoca (571)	Klebsiella (570)	Enterobacteriaceae (543)	Enterobacterales (91347)	Gammaproteobacteria (1236)	Proteobacteria (1224)	Bacteria (2)	5.19665	7.848
NZ_MK347237.1	0.0556462	0	184	58	circular	2020-08-04								repB_KLEB_VIR, AP006726, |IncHI1B(pNDM-MAR)_1, JN420336,	IncHI1 MLST(-):HCM1_043(-);HCM1_064(-);HCM1_099(-);HCM1_116(-);HCM1_178ac(-);HCM1_259(-);(-)	177430	50.5884	Klebsiella pneumoniae	Klebsiella pneumoniae (573)	Klebsiella (570)	Enterobacteriaceae (543)	Enterobacterales (91347)	Gammaproteobacteria (1236)	Proteobacteria (1224)	Bacteria (2)	4.83541	8.1659
NZ_MK347226.1	0.0556462	0	184	59	circular	2020-08-04								repB_KLEB_VIR, AP006726, |IncHI1B(pNDM-MAR)_1, JN420336,	IncHI1 MLST(-):HCM1_043(-);HCM1_064(-);HCM1_099(-);HCM1_116(-);HCM1_178ac(-);HCM1_259(-);(-)	178268	50.4628	Klebsiella pneumoniae	Klebsiella pneumoniae (573)	Klebsiella (570)	Enterobacteriaceae (543)	Enterobacterales (91347)	Gammaproteobacteria (1236)	Proteobacteria (1224)	Bacteria (2)	4.84646	8.17016
NZ_MK413719.1	0.0558655	0	183	60	circular	2020-06-04								IncHI1B(pNDM-MAR)_1, JN420336, |IncFIB(pNDM-Mar)_1, JN420336,	IncHI1 MLST(-):HCM1_043(-);HCM1_064(-);HCM1_099(-);HCM1_116(-);HCM1_178ac(-);HCM1_259(-);(-)|IncF RST(F-:A-:B-):FIA(-);FIB(-);FIC(-);FII(-);FIIK(-);FIIS(-);FIIY(-)	194664	46.7899	Klebsiella pneumoniae	Klebsiella pneumoniae (573)	Klebsiella (570)	Enterobacteriaceae (543)	Enterobacterales (91347)	Gammaproteobacteria (1236)	Proteobacteria (1224)	Bacteria (2)	15.659	-0.0609743
NZ_CP059311.1	0.0558655	0	183	61	circular	2020-08-03	not applicable				not applicable	Homo sapiens		IncFIB(pNDM-Mar)_1, JN420336, |IncHI1B(pNDM-MAR)_1, JN420336,	IncF RST(F-:A-:B-):FIA(-);FIB(-);FIC(-);FII(-);FIIK(-);FIIS(-);FIIY(-)|IncHI1 MLST(-):HCM1_043(-);HCM1_064(-);HCM1_099(-);HCM1_116(-);HCM1_178ac(-);HCM1_259(-);(-)	286241	46.705	Klebsiella pneumoniae	Klebsiella pneumoniae (573)	Klebsiella (570)	Enterobacteriaceae (543)	Enterobacterales (91347)	Gammaproteobacteria (1236)	Proteobacteria (1224)	Bacteria (2)	15.6608	-0.0661011
NZ_MK347231.1	0.0558655	0	183	62	circular	2020-08-04								repB_KLEB_VIR, AP006726, |IncHI1B(pNDM-MAR)_1, JN420336,	IncHI1 MLST(-):HCM1_043(-);HCM1_064(-);HCM1_099(-);HCM1_116(-);HCM1_178ac(-);HCM1_259(-);(-)	176874	50.5767	Klebsiella pneumoniae	Klebsiella pneumoniae (573)	Klebsiella (570)	Enterobacteriaceae (543)	Enterobacterales (91347)	Gammaproteobacteria (1236)	Proteobacteria (1224)	Bacteria (2)	4.85532	8.15807
NZ_MK347229.1	0.0558655	0	183	63	circular	2020-08-04								repB_KLEB_VIR, AP006726, |IncHI1B(pNDM-MAR)_1, JN420336,	IncHI1 MLST(-):HCM1_043(-);HCM1_064(-);HCM1_099(-);HCM1_116(-);HCM1_178ac(-);HCM1_259(-);(-)	177827	50.5148	Klebsiella pneumoniae	Klebsiella pneumoniae (573)	Klebsiella (570)	Enterobacteriaceae (543)	Enterobacterales (91347)	Gammaproteobacteria (1236)	Proteobacteria (1224)	Bacteria (2)	4.84484	8.16572
NZ_MK347233.1	0.0558655	0	183	64	circular	2020-08-04								repB_KLEB_VIR, AP006726, |IncHI1B(pNDM-MAR)_1, JN420336,	IncHI1 MLST(-):HCM1_043(-);HCM1_064(-);HCM1_099(-);HCM1_116(-);HCM1_178ac(-);HCM1_259(-);(-)	177476	50.4947	Klebsiella pneumoniae	Klebsiella pneumoniae (573)	Klebsiella (570)	Enterobacteriaceae (543)	Enterobacterales (91347)	Gammaproteobacteria (1236)	Proteobacteria (1224)	Bacteria (2)	4.83767	8.16019
NZ_CP056683.1	0.0560862	0	182	65	circular	2020-08-03	United Kingdom	United Kingdom	54.7024	-3.27658	Wastewater influent sample		culture	IncFIB(K)(pCAV1099-114)_1, CP011596,	IncF RST(F-:A-:B-):FIA(-);FIB(-);FIC(-);FII(-);FIIK(-);FIIS(-);FIIY(-)	219226	50.9953	Klebsiella grimontii	Klebsiella grimontii (2058152)	Klebsiella (570)	Enterobacteriaceae (543)	Enterobacterales (91347)	Gammaproteobacteria (1236)	Proteobacteria (1224)	Bacteria (2)	5.1871	7.88074
NZ_MK347234.1	0.0560862	0	182	66	circular	2020-08-04								repB_KLEB_VIR, AP006726, |IncHI1B(pNDM-MAR)_1, JN420336,	IncHI1 MLST(-):HCM1_043(-);HCM1_064(-);HCM1_099(-);HCM1_116(-);HCM1_178ac(-);HCM1_259(-);(-)	177333	50.6431	Klebsiella pneumoniae	Klebsiella pneumoniae (573)	Klebsiella (570)	Enterobacteriaceae (543)	Enterobacterales (91347)	Gammaproteobacteria (1236)	Proteobacteria (1224)	Bacteria (2)	4.84318	8.15616
NZ_CP008933.1	0.0563082	0	181	67	circular	2015-01-21	Nepal		27.4	85.19	blood	Homo sapiens		IncFIB(pNDM-Mar)_1, JN420336, |IncHI1B(pNDM-MAR)_1, JN420336,	IncF RST(F-:A-:B-):FIA(-);FIB(-);FIC(-);FII(-);FIIK(-);FIIS(-);FIIY(-)|IncHI1 MLST(-):HCM1_043(-);HCM1_064(-);HCM1_099(-);HCM1_116(-);HCM1_178ac(-);HCM1_259(-);(-)	304526	47.4935	Klebsiella pneumoniae	Klebsiella pneumoniae (573)	Klebsiella (570)	Enterobacteriaceae (543)	Enterobacterales (91347)	Gammaproteobacteria (1236)	Proteobacteria (1224)	Bacteria (2)	15.6606	-0.062308
NZ_MK347230.1	0.0563082	0	181	68	circular	2020-08-04								repB_KLEB_VIR, AP006726, |IncHI1B(pNDM-MAR)_1, JN420336,	IncHI1 MLST(-):HCM1_043(-);HCM1_064(-);HCM1_099(-);HCM1_116(-);HCM1_178ac(-);HCM1_259(-);(-)	177394	50.5023	Klebsiella pneumoniae	Klebsiella pneumoniae (573)	Klebsiella (570)	Enterobacteriaceae (543)	Enterobacterales (91347)	Gammaproteobacteria (1236)	Proteobacteria (1224)	Bacteria (2)	4.85607	8.15379
NZ_CP018338.1	0.0565317	0	180	69	circular	2016-12-19	Germany: Goettingen		51.5392	9.91156	wound swab	Homo sapiens		repB_KLEB_VIR, AP006726,		202175	49.5229	Klebsiella pneumoniae	Klebsiella pneumoniae (573)	Klebsiella (570)	Enterobacteriaceae (543)	Enterobacterales (91347)	Gammaproteobacteria (1236)	Proteobacteria (1224)	Bacteria (2)	15.3335	0.90456
NZ_AP019666.1	0.0567566	0	179	70	circular	2020-03-01	not applicable							repB_KLEB_VIR, AP006726,		166700	49.838	Klebsiella pneumoniae	Klebsiella pneumoniae (573)	Klebsiella (570)	Enterobacteriaceae (543)	Enterobacterales (91347)	Gammaproteobacteria (1236)	Proteobacteria (1224)	Bacteria (2)	15.3213	0.935688
NZ_CP012754.1	0.056983	0	178	71	circular	2016-01-27	Korea: Seoul		37.6463	127.029	Burn Patient	Homo sapiens		IncFIB(pNDM-Mar)_1, JN420336, |IncHI1B(pNDM-MAR)_1, JN420336,	IncF RST(F-:A-:B-):FIA(-);FIB(-);FIC(-);FII(-);FIIK(-);FIIS(-);FIIY(-)|IncHI1 MLST(-):HCM1_043(-);HCM1_064(-);HCM1_099(-);HCM1_116(-);HCM1_178ac(-);HCM1_259(-);(-)	273628	46.2504	Klebsiella pneumoniae	Klebsiella pneumoniae (573)	Klebsiella (570)	Enterobacteriaceae (543)	Enterobacterales (91347)	Gammaproteobacteria (1236)	Proteobacteria (1224)	Bacteria (2)	15.6706	-0.0630598
NZ_CP006799.1	0.0572108	0	177	72	circular	2015-03-01								IncFIB(pNDM-Mar)_1, JN420336, |IncHI1B(pNDM-MAR)_1, JN420336,	IncF RST(F-:A-:B-):FIA(-);FIB(-);FIC(-);FII(-);FIIK(-);FIIS(-);FIIY(-)|IncHI1 MLST(-):HCM1_043(-);HCM1_064(-);HCM1_099(-);HCM1_116(-);HCM1_178ac(-);HCM1_259(-);(-)	283371	46.4105	Klebsiella pneumoniae subsp. pneumoniae PittNDM01	Klebsiella pneumoniae (573)	Klebsiella (570)	Enterobacteriaceae (543)	Enterobacterales (91347)	Gammaproteobacteria (1236)	Proteobacteria (1224)	Bacteria (2)	15.659	-0.0786671
NZ_CP016921.1	0.0572108	0	177	73	circular	2016-08-26	USA: Pennsylvania	USA,Pennsylvania	40.97	-77.7279	urine	Homo sapiens		IncHI1B(pNDM-MAR)_1, JN420336, |IncFIB(pNDM-Mar)_1, JN420336,	IncHI1 MLST(-):HCM1_043(-);HCM1_064(-);HCM1_099(-);HCM1_116(-);HCM1_178ac(-);HCM1_259(-);(-)|IncF RST(F-:A-:B-):FIA(-);FIB(-);FIC(-);FII(-);FIIK(-);FIIS(-);FIIY(-)	283369	46.4102	Klebsiella pneumoniae	Klebsiella pneumoniae (573)	Klebsiella (570)	Enterobacteriaceae (543)	Enterobacterales (91347)	Gammaproteobacteria (1236)	Proteobacteria (1224)	Bacteria (2)	15.6312	-0.109976
NZ_CP028929.1	0.0572108	0	177	74	circular	2018-04-25	missing				missing	missing		IncFIB(pNDM-Mar)_1, JN420336, |IncHI1B(pNDM-MAR)_1, JN420336,	IncF RST(F-:A-:B-):FIA(-);FIB(-);FIC(-);FII(-);FIIK(-);FIIS(-);FIIY(-)|IncHI1 MLST(-):HCM1_043(-);HCM1_064(-);HCM1_099(-);HCM1_116(-);HCM1_178ac(-);HCM1_259(-);(-)	283371	46.4105	Klebsiella pneumoniae	Klebsiella pneumoniae (573)	Klebsiella (570)	Enterobacteriaceae (543)	Enterobacterales (91347)	Gammaproteobacteria (1236)	Proteobacteria (1224)	Bacteria (2)	15.6569	-0.075781
NZ_CP031799.1	0.0572108	0	177	75	circular	2018-09-02					sterile			IncFIB(K)(pCAV1099-114)_1, CP011596, |IncHI1B(pNDM-MAR)_1, JN420336,	IncF RST(F-:A-:B-):FIA(-);FIB(-);FIC(-);FII(-);FIIK(-);FIIS(-);FIIY(-)|IncHI1 MLST(-):HCM1_043(-);HCM1_064(-);HCM1_099(-);HCM1_116(-);HCM1_178ac(-);HCM1_259(-);(-)	133343	50.0454	Klebsiella pneumoniae	Klebsiella pneumoniae (573)	Klebsiella (570)	Enterobacteriaceae (543)	Enterobacterales (91347)	Gammaproteobacteria (1236)	Proteobacteria (1224)	Bacteria (2)	5.18356	7.90627
NZ_CP063928.1	0.0572108	0	177	76	circular	2020-11-10	China:Tangshan		39.36	118.11	Human fecal samples			repB_KLEB_VIR, AP006726,		208376	49.3109	Klebsiella pneumoniae	Klebsiella pneumoniae (573)	Klebsiella (570)	Enterobacteriaceae (543)	Enterobacterales (91347)	Gammaproteobacteria (1236)	Proteobacteria (1224)	Bacteria (2)	15.3871	0.851269
CP052432.1	0.0572108	0	177	77	circular	2020-05-04	South Korea: Gangwon		37.82	128.16	blood	Homo sapiens		repB_KLEB_VIR, AP006726, |IncHI1B(pNDM-MAR)_1, JN420336,	IncHI1 MLST(-):HCM1_043(-);HCM1_064(-);HCM1_099(-);HCM1_116(-);HCM1_178ac(-);HCM1_259(-);(-)	179285	50.311	Klebsiella pneumoniae	Klebsiella pneumoniae (573)	Klebsiella (570)	Enterobacteriaceae (543)	Enterobacterales (91347)	Gammaproteobacteria (1236)	Proteobacteria (1224)	Bacteria (2)	4.86158	8.16531
NZ_MK347228.1	0.0572108	0	177	78	circular	2020-08-04								repB_KLEB_VIR, AP006726, |IncHI1B(pNDM-MAR)_1, JN420336,	IncHI1 MLST(-):HCM1_043(-);HCM1_064(-);HCM1_099(-);HCM1_116(-);HCM1_178ac(-);HCM1_259(-);(-)	178083	50.4057	Klebsiella pneumoniae	Klebsiella pneumoniae (573)	Klebsiella (570)	Enterobacteriaceae (543)	Enterobacterales (91347)	Gammaproteobacteria (1236)	Proteobacteria (1224)	Bacteria (2)	4.86276	8.17001
NZ_CP014763.1	0.0574401	0	176	79	circular	2016-06-21	USA		38.9847	-77.0947				repB_KLEB_VIR, AP006726,		284894	50.9003	Klebsiella pneumoniae	Klebsiella pneumoniae (573)	Klebsiella (570)	Enterobacteriaceae (543)	Enterobacterales (91347)	Gammaproteobacteria (1236)	Proteobacteria (1224)	Bacteria (2)	5.17815	7.91659
NZ_CP054064.1	0.0574401	0	176	80	circular	2020-06-08	China: Wuxi	China,Wuxi	31.5776	120.295	blood sample		blood sample	repB_KLEB_VIR, AP006726,		211588	49.6432	Klebsiella pneumoniae	Klebsiella pneumoniae (573)	Klebsiella (570)	Enterobacteriaceae (543)	Enterobacterales (91347)	Gammaproteobacteria (1236)	Proteobacteria (1224)	Bacteria (2)	15.3397	0.90311
NZ_CP026166.1	0.0574401	0	176	81	circular	2019-02-01	China: Fujian Province		26.0939	119.313	incision secretion	Homo sapiens		repB_KLEB_VIR, AP006726,		211437	49.6398	Klebsiella pneumoniae	Klebsiella pneumoniae (573)	Klebsiella (570)	Enterobacteriaceae (543)	Enterobacterales (91347)	Gammaproteobacteria (1236)	Proteobacteria (1224)	Bacteria (2)	15.3414	0.900947
NZ_CP020854.1	0.0574401	0	176	82	circular	2017-05-25	USA: Houston		29.7107	-95.4006	respiratory	Homo sapiens		IncHI1B(pNDM-MAR)_1, JN420336, |IncFIB(pNDM-Mar)_1, JN420336,	IncHI1 MLST(-):HCM1_043(-);HCM1_064(-);HCM1_099(-);HCM1_116(-);HCM1_178ac(-);HCM1_259(-);(-)|IncF RST(F-:A-:B-):FIA(-);FIB(-);FIC(-);FII(-);FIIK(-);FIIS(-);FIIY(-)	292471	46.3454	Klebsiella pneumoniae	Klebsiella pneumoniae (573)	Klebsiella (570)	Enterobacteriaceae (543)	Enterobacterales (91347)	Gammaproteobacteria (1236)	Proteobacteria (1224)	Bacteria (2)	15.6699	-0.0841551
NZ_CP063429.1	0.0574401	0	176	83	circular	2020-11-17	Singapore		1.3213	103.846	rectal swab	Homo sapiens		repB_KLEB_VIR, AP006726,		214979	49.6309	Klebsiella pneumoniae	Klebsiella pneumoniae (573)	Klebsiella (570)	Enterobacteriaceae (543)	Enterobacterales (91347)	Gammaproteobacteria (1236)	Proteobacteria (1224)	Bacteria (2)	15.3397	0.900721
NZ_CP031258.1	0.0574401	0	176	84	circular	2018-09-08	China		40.22	116.2	bronchoalveolar lavage fluid	Homo sapiens		repB_KLEB_VIR, AP006726,		212635	49.6602	Klebsiella quasipneumoniae	Klebsiella quasipneumoniae (1463165)	Klebsiella (570)	Enterobacteriaceae (543)	Enterobacterales (91347)	Gammaproteobacteria (1236)	Proteobacteria (1224)	Bacteria (2)	15.3385	0.904318
NZ_MK715436.1	0.057671	0	175	85	circular	2020-06-04								repB_KLEB_VIR, AP006726,		211807	49.6915	Klebsiella pneumoniae subsp. pneumoniae	Klebsiella pneumoniae (573)	Klebsiella (570)	Enterobacteriaceae (543)	Enterobacterales (91347)	Gammaproteobacteria (1236)	Proteobacteria (1224)	Bacteria (2)	15.3414	0.894325
NZ_CP034406.1	0.0579033	0	174	86	circular	2019-02-07	Thailand: Chiang Mai		18.7904	98.9847	sputum	Homo sapiens		IncFIB(pNDM-Mar)_1, JN420336, |IncHI1B(pNDM-MAR)_1, JN420336,	IncF RST(F-:A-:B-):FIA(-);FIB(-);FIC(-);FII(-);FIIK(-);FIIS(-);FIIY(-)|IncHI1 MLST(-):HCM1_043(-);HCM1_064(-);HCM1_099(-);HCM1_116(-);HCM1_178ac(-);HCM1_259(-);(-)	300327	46.5533	Klebsiella pneumoniae	Klebsiella pneumoniae (573)	Klebsiella (570)	Enterobacteriaceae (543)	Enterobacterales (91347)	Gammaproteobacteria (1236)	Proteobacteria (1224)	Bacteria (2)	15.7075	-0.0566129
NZ_AP018748.1	0.0579033	0	174	87	circular	2018-09-20	Thailand:Bangkok		13.7666	100.527		Homo sapiens		IncHI1B(pNDM-MAR)_1, JN420336, |IncFIB(pNDM-Mar)_1, JN420336,	IncHI1 MLST(-):HCM1_043(-);HCM1_064(-);HCM1_099(-);HCM1_116(-);HCM1_178ac(-);HCM1_259(-);(-)|IncF RST(F-:A-:B-):FIA(-);FIB(-);FIC(-);FII(-);FIIK(-);FIIS(-);FIIY(-)	296750	46.5378	Klebsiella pneumoniae	Klebsiella pneumoniae (573)	Klebsiella (570)	Enterobacteriaceae (543)	Enterobacterales (91347)	Gammaproteobacteria (1236)	Proteobacteria (1224)	Bacteria (2)	15.6915	-0.0361354
LR890425.1	0.0583726	0	172	88	circular	2020-10-30								repB_KLEB_VIR, AP006726, |IncHI1B(pNDM-MAR)_1, JN420336,	IncHI1 MLST(-):HCM1_043(-);HCM1_064(-);HCM1_099(-);HCM1_116(-);HCM1_178ac(-);HCM1_259(-);(-)	184695	50.4729	Klebsiella pneumoniae	Klebsiella pneumoniae (573)	Klebsiella (570)	Enterobacteriaceae (543)	Enterobacterales (91347)	Gammaproteobacteria (1236)	Proteobacteria (1224)	Bacteria (2)	17.7475	16.0697
NZ_CP020068.1	0.0586096	0	171	89	circular	2017-03-23	missing				missing	missing		IncHI1B(pNDM-MAR)_1, JN420336, |IncFIB(pNDM-Mar)_1, JN420336,	IncHI1 MLST(-):HCM1_043(-);HCM1_064(-);HCM1_099(-);HCM1_116(-);HCM1_178ac(-);HCM1_259(-);(-)|IncF RST(F-:A-:B-):FIA(-);FIB(-);FIC(-);FII(-);FIIK(-);FIIS(-);FIIY(-)	276460	46.5977	Klebsiella pneumoniae	Klebsiella pneumoniae (573)	Klebsiella (570)	Enterobacteriaceae (543)	Enterobacterales (91347)	Gammaproteobacteria (1236)	Proteobacteria (1224)	Bacteria (2)	15.6596	-0.0724544
MN543585.1	0.0586096	0	171	90	circular	2020-06-12								IncFIB(K)(pCAV1099-114)_1, CP011596, |IncHI1B(pNDM-MAR)_1, JN420336,	IncF RST(F-:A-:B-):FIA(-);FIB(-);FIC(-);FII(-);FIIK(-);FIIS(-);FIIY(-)|IncHI1 MLST(-):HCM1_043(-);HCM1_064(-);HCM1_099(-);HCM1_116(-);HCM1_178ac(-);HCM1_259(-);(-)	250183	50.5022	Klebsiella pneumoniae	Klebsiella pneumoniae (573)	Klebsiella (570)	Enterobacteriaceae (543)	Enterobacterales (91347)	Gammaproteobacteria (1236)	Proteobacteria (1224)	Bacteria (2)	5.16133	8.0472
NZ_CP020902.1	0.0588483	0	170	91	circular	2017-05-03	Norway	Norway	64.5732	11.528	urine	Homo sapiens		IncHI1B(pNDM-MAR)_1, JN420336, |IncFII(K)_1, CP000648, |IncR_1, DQ449578, |IncFIB(pNDM-Mar)_1, JN420336,	IncHI1 MLST(-):HCM1_043(-);HCM1_064(-);HCM1_099(-);HCM1_116(-);HCM1_178ac(-);HCM1_259(-);(-)|IncF RST(K14:A-:B-):FIA(-);FIB(-);FIC(-);FII(-);FIIK(14);FIIS(-);FIIY(-)	338512	47.8382	Klebsiella pneumoniae	Klebsiella pneumoniae (573)	Klebsiella (570)	Enterobacteriaceae (543)	Enterobacterales (91347)	Gammaproteobacteria (1236)	Proteobacteria (1224)	Bacteria (2)	15.6597	-0.0669889
NZ_MT035874.1	0.0588483	0	170	92	circular	2020-08-04								repB_KLEB_VIR, AP006726, |IncHI1B(pNDM-MAR)_1, JN420336,	IncHI1 MLST(-):HCM1_043(-);HCM1_064(-);HCM1_099(-);HCM1_116(-);HCM1_178ac(-);HCM1_259(-);(-)	228158	50.3318	Klebsiella pneumoniae	Klebsiella pneumoniae (573)	Klebsiella (570)	Enterobacteriaceae (543)	Enterobacterales (91347)	Gammaproteobacteria (1236)	Proteobacteria (1224)	Bacteria (2)	15.1406	1.12643
NZ_CP050847.1	0.0588483	0	170	93	circular	2020-04-09	China: Heilongjiang		47.6	126.08	milk			IncFIB(K)(pCAV1099-114)_1, CP011596,	IncF RST(F-:A-:B-):FIA(-);FIB(-);FIC(-);FII(-);FIIK(-);FIIS(-);FIIY(-)	107922	49.2207	Klebsiella pneumoniae	Klebsiella pneumoniae (573)	Klebsiella (570)	Enterobacteriaceae (543)	Enterobacterales (91347)	Gammaproteobacteria (1236)	Proteobacteria (1224)	Bacteria (2)	5.17408	7.87304
MF943217.1	0.0590885	0	169	94	circular	2017-12-26	China: Sichuan, Chengdu	China,Sichuan,Chengdu	30.6766	104.061		Homo sapiens	culture	IncHI1B(pNDM-MAR)_1, JN420336, |repB_KLEB_VIR, AP006726,	IncHI1 MLST(-):HCM1_043(-);HCM1_064(-);HCM1_099(-);HCM1_116(-);HCM1_178ac(-);HCM1_259(-);(-)	208166	49.7084	Klebsiella pneumoniae	Klebsiella pneumoniae (573)	Klebsiella (570)	Enterobacteriaceae (543)	Enterobacterales (91347)	Gammaproteobacteria (1236)	Proteobacteria (1224)	Bacteria (2)	15.3383	0.911652
NZ_CP035906.1	0.0590885	0	169	95	circular	2019-04-03	India		12.9165	79.1325	blood	Homo sapiens		repB_KLEB_VIR, AP006726,		216620	49.4396	Klebsiella pneumoniae	Klebsiella pneumoniae (573)	Klebsiella (570)	Enterobacteriaceae (543)	Enterobacterales (91347)	Gammaproteobacteria (1236)	Proteobacteria (1224)	Bacteria (2)	15.2961	0.994058
CP028390.2	0.0590885	0	169	96	circular	2018-03-30	China: Sichuan, Chengdu	China,Sichuan,Chengdu	30.6766	104.061		Homo sapiens	culture	repB_KLEB_VIR, AP006726, |IncHI1B(pNDM-MAR)_1, JN420336,	IncHI1 MLST(-):HCM1_043(-);HCM1_064(-);HCM1_099(-);HCM1_116(-);HCM1_178ac(-);HCM1_259(-);(-)	208166	49.707	Klebsiella pneumoniae	Klebsiella pneumoniae (573)	Klebsiella (570)	Enterobacteriaceae (543)	Enterobacterales (91347)	Gammaproteobacteria (1236)	Proteobacteria (1224)	Bacteria (2)	15.3783	0.869353
NZ_CP036191.1	0.0590885	0	169	97	circular	2019-02-27	India		12.9246	79.1348	blood	Homo sapiens		repB_KLEB_VIR, AP006726,		216586	49.4446	Klebsiella pneumoniae	Klebsiella pneumoniae (573)	Klebsiella (570)	Enterobacteriaceae (543)	Enterobacterales (91347)	Gammaproteobacteria (1236)	Proteobacteria (1224)	Bacteria (2)	15.2962	0.993413
NZ_CP021961.1	0.0590885	0	169	98	circular	2017-06-22	missing				missing	missing		IncHI1B(pNDM-MAR)_1, JN420336, |IncFIB(K)(pCAV1099-114)_1, CP011596,	IncHI1 MLST(-):HCM1_043(-);HCM1_064(-);HCM1_099(-);HCM1_116(-);HCM1_178ac(-);HCM1_259(-);(-)|IncF RST(F-:A-:B-):FIA(-);FIB(-);FIC(-);FII(-);FIIK(-);FIIS(-);FIIY(-)	97389	52.8797	Klebsiella pneumoniae	Klebsiella pneumoniae (573)	Klebsiella (570)	Enterobacteriaceae (543)	Enterobacterales (91347)	Gammaproteobacteria (1236)	Proteobacteria (1224)	Bacteria (2)	5.12434	7.81185
NZ_MN240794.1	0.0590885	0	169	99	circular	2020-08-04								IncFIB(pNDM-Mar)_1, JN420336, |IncHI1B(pNDM-MAR)_1, JN420336,	IncF RST(F-:A-:B-):FIA(-);FIB(-);FIC(-);FII(-);FIIK(-);FIIS(-);FIIY(-)|IncHI1 MLST(-):HCM1_043(-);HCM1_064(-);HCM1_099(-);HCM1_116(-);HCM1_178ac(-);HCM1_259(-);(-)	300876	46.6222	Klebsiella pneumoniae	Klebsiella pneumoniae (573)	Klebsiella (570)	Enterobacteriaceae (543)	Enterobacterales (91347)	Gammaproteobacteria (1236)	Proteobacteria (1224)	Bacteria (2)	15.6601	-0.0785286
NZ_CP056137.1	0.0593303	0	168	100	circular	2020-08-03	United Kingdom	United Kingdom	54.7024	-3.27658	Wastewater influent sample		culture	IncFIB(K)(pCAV1099-114)_1, CP011596,	IncF RST(F-:A-:B-):FIA(-);FIB(-);FIC(-);FII(-);FIIK(-);FIIS(-);FIIY(-)	222341	50.7985	Klebsiella michiganensis	Klebsiella michiganensis (1134687)	Klebsiella (570)	Enterobacteriaceae (543)	Enterobacterales (91347)	Gammaproteobacteria (1236)	Proteobacteria (1224)	Bacteria (2)	5.16694	7.88519
NZ_CP047193.1	0.0593303	0	168	101	circular	2020-01-16	China: Shanghai	China,Shanghai	31.2253	121.489		Homo sapiens		IncHI1B(pNDM-MAR)_1, JN420336, |repB_KLEB_VIR, AP006726,	IncHI1 MLST(-):HCM1_043(-);HCM1_064(-);HCM1_099(-);HCM1_116(-);HCM1_178ac(-);HCM1_259(-);(-)	219800	50.0227	Klebsiella pneumoniae	Klebsiella pneumoniae (573)	Klebsiella (570)	Enterobacteriaceae (543)	Enterobacterales (91347)	Gammaproteobacteria (1236)	Proteobacteria (1224)	Bacteria (2)	15.1032	1.16973
NZ_CP064224.1	0.0593303	0	168	102	circular	2020-11-12	China:Nanchang	China,Nanchang	28.6793	115.889	blood		whole organism	repB_KLEB_VIR, AP006726, |IncHI1B(pNDM-MAR)_1, JN420336,	IncHI1 MLST(-):HCM1_043(-);HCM1_064(-);HCM1_099(-);HCM1_116(-);HCM1_178ac(-);HCM1_259(-);(-)	219796	50.0232	Klebsiella pneumoniae	Klebsiella pneumoniae (573)	Klebsiella (570)	Enterobacteriaceae (543)	Enterobacterales (91347)	Gammaproteobacteria (1236)	Proteobacteria (1224)	Bacteria (2)	15.1117	1.156
NZ_CP063760.1	0.0595738	0	167	103	circular	2020-11-05	China: Anhui		31.8528	117.26	missing	Homo sapiens		repB_KLEB_VIR, AP006726, |IncHI1B(pNDM-MAR)_1, JN420336,	IncHI1 MLST(-):HCM1_043(-);HCM1_064(-);HCM1_099(-);HCM1_116(-);HCM1_178ac(-);HCM1_259(-);(-)	219933	50.0289	Klebsiella pneumoniae	Klebsiella pneumoniae (573)	Klebsiella (570)	Enterobacteriaceae (543)	Enterobacterales (91347)	Gammaproteobacteria (1236)	Proteobacteria (1224)	Bacteria (2)	15.1137	1.15349
NZ_CP022612.1	0.0595738	0	167	104	circular	2018-07-12	missing				missing	missing		IncFIB(pNDM-Mar)_1, JN420336, |IncHI1B(pNDM-MAR)_1, JN420336, |IncR_1, DQ449578, |IncFIA(HI1)_1, AF250878,	IncF RST(F-:A13:B-):FIA(13);FIB(-);FIC(-);FII(-);FIIK(-);FIIS(-);FIIY(-)|IncHI1 MLST(-):HCM1_043(-);HCM1_064(-);HCM1_099(-);HCM1_116(-);HCM1_178ac(-);HCM1_259(-);(-)	334957	47.533	Klebsiella pneumoniae	Klebsiella pneumoniae (573)	Klebsiella (570)	Enterobacteriaceae (543)	Enterobacterales (91347)	Gammaproteobacteria (1236)	Proteobacteria (1224)	Bacteria (2)	15.6632	-0.0813132
NZ_CP061702.1	0.059819	0	166	105	circular	2020-09-27	China: Zhengzhou		34.58	112.42	infant sputum	Homo sapiens		IncFIB(K)(pCAV1099-114)_1, CP011596,	IncF RST(F-:A-:B-):FIA(-);FIB(-);FIC(-);FII(-);FIIK(-);FIIS(-);FIIY(-)	125663	49.7633	Klebsiella pneumoniae	Klebsiella pneumoniae (573)	Klebsiella (570)	Enterobacteriaceae (543)	Enterobacterales (91347)	Gammaproteobacteria (1236)	Proteobacteria (1224)	Bacteria (2)	5.19327	7.88907
NZ_CP032241.1	0.059819	0	166	106	circular	2020-01-15	China:Shanghai		31.34	121.37	blood	Homo sapiens		repB_KLEB_VIR, AP006726, |IncHI1B(pNDM-MAR)_1, JN420336,	IncHI1 MLST(-):HCM1_043(-);HCM1_064(-);HCM1_099(-);HCM1_116(-);HCM1_178ac(-);HCM1_259(-);(-)	219775	50.0207	Klebsiella pneumoniae	Klebsiella pneumoniae (573)	Klebsiella (570)	Enterobacteriaceae (543)	Enterobacterales (91347)	Gammaproteobacteria (1236)	Proteobacteria (1224)	Bacteria (2)	15.114	1.15214
NZ_CP061351.1	0.0600659	0	165	107	circular	2020-09-27	Singapore		1.3213	103.846	Stool/Rectal Swab	Homo sapiens		repB_KLEB_VIR, AP006726, |IncHI1B(pNDM-MAR)_1, JN420336,	IncHI1 MLST(-):HCM1_043(-);HCM1_064(-);HCM1_099(-);HCM1_116(-);HCM1_178ac(-);HCM1_259(-);(-)	200067	50.1727	Klebsiella pneumoniae	Klebsiella pneumoniae (573)	Klebsiella (570)	Enterobacteriaceae (543)	Enterobacterales (91347)	Gammaproteobacteria (1236)	Proteobacteria (1224)	Bacteria (2)	15.2701	1.00679
NZ_CP061360.1	0.0603145	0	164	108	circular	2020-09-27	China: ZhengZhou		34.16	112.42	infant sputum	Homo sapiens		IncFIB(K)(pCAV1099-114)_1, CP011596, |Col(pHAD28)_1, KU674895, |IncHI1B(pNDM-MAR)_1, JN420336,	IncF RST(F-:A-:B-):FIA(-);FIB(-);FIC(-);FII(-);FIIK(-);FIIS(-);FIIY(-)|IncHI1 MLST(-):HCM1_043(-);HCM1_064(-);HCM1_099(-);HCM1_116(-);HCM1_178ac(-);HCM1_259(-);(-)	394183	52.0976	Klebsiella pneumoniae	Klebsiella pneumoniae (573)	Klebsiella (570)	Enterobacteriaceae (543)	Enterobacterales (91347)	Gammaproteobacteria (1236)	Proteobacteria (1224)	Bacteria (2)	5.35677	8.30237
NZ_CP032164.1	0.0603145	0	164	109	circular	2019-06-22	China:Shanghai		31.34	121.37	urine	Homo sapiens		IncHI1B(pNDM-MAR)_1, JN420336, |repB_KLEB_VIR, AP006726,	IncHI1 MLST(-):HCM1_043(-);HCM1_064(-);HCM1_099(-);HCM1_116(-);HCM1_178ac(-);HCM1_259(-);(-)	207409	50.3725	Klebsiella pneumoniae	Klebsiella pneumoniae (573)	Klebsiella (570)	Enterobacteriaceae (543)	Enterobacterales (91347)	Gammaproteobacteria (1236)	Proteobacteria (1224)	Bacteria (2)	15.098	1.16994
NZ_MK413722.1	0.0605648	0	163	110	circular	2020-06-04								IncHI1B(pNDM-MAR)_1, JN420336, |IncFIB(pNDM-Mar)_1, JN420336,	IncHI1 MLST(-):HCM1_043(-);HCM1_064(-);HCM1_099(-);HCM1_116(-);HCM1_178ac(-);HCM1_259(-);(-)|IncF RST(F-:A-:B-):FIA(-);FIB(-);FIC(-);FII(-);FIIK(-);FIIS(-);FIIY(-)	317970	47.6576	Klebsiella pneumoniae	Klebsiella pneumoniae (573)	Klebsiella (570)	Enterobacteriaceae (543)	Enterobacterales (91347)	Gammaproteobacteria (1236)	Proteobacteria (1224)	Bacteria (2)	15.5128	0.261747
CP023135.2	0.0605648	0	163	111	circular	2017-09-05	United Kingdom		51.42	-0.17	Pus	Homo sapiens		repB_KLEB_VIR, AP006726,		211454	49.624	Klebsiella pneumoniae subsp. pneumoniae	Klebsiella pneumoniae (573)	Klebsiella (570)	Enterobacteriaceae (543)	Enterobacterales (91347)	Gammaproteobacteria (1236)	Proteobacteria (1224)	Bacteria (2)	15.3307	0.914255
NZ_CP028549.2	0.0605648	0	163	112	circular	2018-04-05	China: Meishan, Sichuan	China,Meishan,Sichuan	29.8133	103.83		Homo sapiens	Culture	IncFIB(K)(pCAV1099-114)_1, CP011596,	IncF RST(F-:A-:B-):FIA(-);FIB(-);FIC(-);FII(-);FIIK(-);FIIS(-);FIIY(-)	248112	52.0269	Klebsiella variicola	Klebsiella variicola (244366)	Klebsiella (570)	Enterobacteriaceae (543)	Enterobacterales (91347)	Gammaproteobacteria (1236)	Proteobacteria (1224)	Bacteria (2)	5.20443	7.88492
NZ_CP039526.1	0.0605648	0	163	113	circular	2020-03-27	China	China	34.4118	86.0327		Homo sapiens	cell culture	IncFIB(pNDM-Mar)_1, JN420336, |IncHI1B(pNDM-MAR)_1, JN420336,	IncF RST(F-:A-:B-):FIA(-);FIB(-);FIC(-);FII(-);FIIK(-);FIIS(-);FIIY(-)|IncHI1 MLST(-):HCM1_043(-);HCM1_064(-);HCM1_099(-);HCM1_116(-);HCM1_178ac(-);HCM1_259(-);(-)	396373	48.0641	Klebsiella pneumoniae subsp. pneumoniae	Klebsiella pneumoniae (573)	Klebsiella (570)	Enterobacteriaceae (543)	Enterobacterales (91347)	Gammaproteobacteria (1236)	Proteobacteria (1224)	Bacteria (2)	15.6472	-0.0369712
NZ_CP026022.1	0.0605648	0	163	114	circular	2018-12-26	China	China	34.4118	86.0327		Homo sapiens	cell culture	repB_KLEB_VIR, AP006726, |IncHI1B(pNDM-MAR)_1, JN420336,	IncHI1 MLST(-):HCM1_043(-);HCM1_064(-);HCM1_099(-);HCM1_116(-);HCM1_178ac(-);HCM1_259(-);(-)	193176	50.3681	Klebsiella pneumoniae	Klebsiella pneumoniae (573)	Klebsiella (570)	Enterobacteriaceae (543)	Enterobacterales (91347)	Gammaproteobacteria (1236)	Proteobacteria (1224)	Bacteria (2)	15.3146	0.976586
NZ_CP064242.1	0.0605648	0	163	115	circular	2020-11-12	China:Nanchang	China,Nanchang	28.6793	115.889		Homo sapiens	whole organism	IncHI1B(pNDM-MAR)_1, JN420336, |repB_KLEB_VIR, AP006726,	IncHI1 MLST(-):HCM1_043(-);HCM1_064(-);HCM1_099(-);HCM1_116(-);HCM1_178ac(-);HCM1_259(-);(-)	221242	50.0104	Klebsiella pneumoniae	Klebsiella pneumoniae (573)	Klebsiella (570)	Enterobacteriaceae (543)	Enterobacterales (91347)	Gammaproteobacteria (1236)	Proteobacteria (1224)	Bacteria (2)	15.1047	1.16205
NZ_CP035180.1	0.0605648	0	163	116	circular	2019-01-22	India		12.9165	79.1325	blood	Homo sapiens		IncFIB(K)_1, JN233704, |IncFII(K)_1, CP000648,	IncF RST(K1:A-:B-):FIA(-);FIB(-);FIC(-);FII(-);FIIK(1);FIIS(-);FIIY(-)	282657	52.1544	Klebsiella pneumoniae	Klebsiella pneumoniae (573)	Klebsiella (570)	Enterobacteriaceae (543)	Enterobacterales (91347)	Gammaproteobacteria (1236)	Proteobacteria (1224)	Bacteria (2)	5.99322	7.88564
NZ_MH263654.1	0.0608169	0	162	117	circular	2020-06-03								repB_KLEB_VIR, AP006726, |IncHI1B(pNDM-MAR)_1, JN420336,	IncHI1 MLST(-):HCM1_043(-);HCM1_064(-);HCM1_099(-);HCM1_116(-);HCM1_178ac(-);HCM1_259(-);(-)	215940	49.887	Klebsiella pneumoniae	Klebsiella pneumoniae (573)	Klebsiella (570)	Enterobacteriaceae (543)	Enterobacterales (91347)	Gammaproteobacteria (1236)	Proteobacteria (1224)	Bacteria (2)	15.0925	1.17829
NC_016980.1	0.0608169	0	162	118	circular	2012-03-14								IncFIB(pNDM-Mar)_1, JN420336, |IncHI1B(pNDM-MAR)_1, JN420336,	IncF RST(F-:A-:B-):FIA(-);FIB(-);FIC(-);FII(-);FIIK(-);FIIS(-);FIIY(-)|IncHI1 MLST(-):HCM1_043(-);HCM1_064(-);HCM1_099(-);HCM1_116(-);HCM1_178ac(-);HCM1_259(-);(-)	267242	46.6996	Klebsiella pneumoniae	Klebsiella pneumoniae (573)	Klebsiella (570)	Enterobacteriaceae (543)	Enterobacterales (91347)	Gammaproteobacteria (1236)	Proteobacteria (1224)	Bacteria (2)	15.7	-0.0354677
CP052232.1	0.0608169	0	162	119	circular	2020-05-04	South Korea: Jeonnam		34.87	126.99	blood	Homo sapiens		repB_KLEB_VIR, AP006726, |IncHI1B(pNDM-MAR)_1, JN420336,	IncHI1 MLST(-):HCM1_043(-);HCM1_064(-);HCM1_099(-);HCM1_116(-);HCM1_178ac(-);HCM1_259(-);(-)	218755	50.0857	Klebsiella pneumoniae	Klebsiella pneumoniae (573)	Klebsiella (570)	Enterobacteriaceae (543)	Enterobacterales (91347)	Gammaproteobacteria (1236)	Proteobacteria (1224)	Bacteria (2)	15.0964	1.17252
NZ_CP064212.1	0.0608169	0	162	120	circular	2020-11-12	China:Nanchang	China,Nanchang	28.6793	115.889	blood		whole organism	IncHI1B(pNDM-MAR)_1, JN420336, |repB_KLEB_VIR, AP006726,	IncHI1 MLST(-):HCM1_043(-);HCM1_064(-);HCM1_099(-);HCM1_116(-);HCM1_178ac(-);HCM1_259(-);(-)	277720	51.167	Klebsiella pneumoniae	Klebsiella pneumoniae (573)	Klebsiella (570)	Enterobacteriaceae (543)	Enterobacterales (91347)	Gammaproteobacteria (1236)	Proteobacteria (1224)	Bacteria (2)	15.1276	1.14388
NZ_MN058044.1	0.0610707	0	161	121	circular	2020-06-04								repB_KLEB_VIR, AP006726,		202517	49.9133	Klebsiella pneumoniae	Klebsiella pneumoniae (573)	Klebsiella (570)	Enterobacteriaceae (543)	Enterobacterales (91347)	Gammaproteobacteria (1236)	Proteobacteria (1224)	Bacteria (2)	15.323	0.930652
CP041024.1	0.0610707	0	161	122	circular	2019-08-28	Taiwan	Taiwan	23.5983	120.835	sputum	Homo sapiens	bacterial culture	repB_KLEB_VIR, AP006726,		202516	49.9131	Klebsiella pneumoniae	Klebsiella pneumoniae (573)	Klebsiella (570)	Enterobacteriaceae (543)	Enterobacterales (91347)	Gammaproteobacteria (1236)	Proteobacteria (1224)	Bacteria (2)	15.3328	0.911379
NZ_CP034416.1	0.0610707	0	161	123	circular	2019-11-22	China: Shandong	China,Shandong	36	119	blood specimen		blood	repB_KLEB_VIR, AP006726, |IncHI1B(pNDM-MAR)_1, JN420336,	IncHI1 MLST(-):HCM1_043(-);HCM1_064(-);HCM1_099(-);HCM1_116(-);HCM1_178ac(-);HCM1_259(-);(-)	215950	49.8727	Klebsiella pneumoniae	Klebsiella pneumoniae (573)	Klebsiella (570)	Enterobacteriaceae (543)	Enterobacterales (91347)	Gammaproteobacteria (1236)	Proteobacteria (1224)	Bacteria (2)	15.0539	1.21271
NZ_CP063946.1	0.0610707	0	161	124	circular	2020-11-10	China:Shenzhen		22.32	114.03	Manis javanica			repB_KLEB_VIR, AP006726, |IncHI1B(pNDM-MAR)_1, JN420336, |IncFII(K)_1, CP000648, |IncR_1, DQ449578,	IncHI1 MLST(-):HCM1_043(-);HCM1_064(-);HCM1_099(-);HCM1_116(-);HCM1_178ac(-);HCM1_259(-);(-)|IncF RST(K5:A-:B-):FIA(-);FIB(-);FIC(-);FII(-);FIIK(5);FIIS(-);FIIY(-)	433968	51.9898	Klebsiella pneumoniae	Klebsiella pneumoniae (573)	Klebsiella (570)	Enterobacteriaceae (543)	Enterobacterales (91347)	Gammaproteobacteria (1236)	Proteobacteria (1224)	Bacteria (2)	6.02147	7.13675
NZ_CP063834.1	0.0610707	0	161	125	circular	2020-11-10	China:Hangzhou	China,Hangzhou	30.249	120.205	induction culture	Homo sapiens		repB_KLEB_VIR, AP006726, |IncHI1B(pNDM-MAR)_1, JN420336,	IncHI1 MLST(-):HCM1_043(-);HCM1_064(-);HCM1_099(-);HCM1_116(-);HCM1_178ac(-);HCM1_259(-);(-)	215999	49.8669	Klebsiella pneumoniae	Klebsiella pneumoniae (573)	Klebsiella (570)	Enterobacteriaceae (543)	Enterobacterales (91347)	Gammaproteobacteria (1236)	Proteobacteria (1224)	Bacteria (2)	15.0971	1.16903
NZ_CP064218.1	0.0610707	0	161	126	circular	2020-11-12	China:Nanchang	China,Nanchang	28.6793	115.889	blood		whole organism	IncHI1B(pNDM-MAR)_1, JN420336, |repB_KLEB_VIR, AP006726,	IncHI1 MLST(-):HCM1_043(-);HCM1_064(-);HCM1_099(-);HCM1_116(-);HCM1_178ac(-);HCM1_259(-);(-)	217869	49.9452	Klebsiella pneumoniae	Klebsiella pneumoniae (573)	Klebsiella (570)	Enterobacteriaceae (543)	Enterobacterales (91347)	Gammaproteobacteria (1236)	Proteobacteria (1224)	Bacteria (2)	15.1118	1.15683
NZ_CP054304.1	0.0613264	0	160	127	circular	2020-06-11	Australia: Brisbane	Australia,Brisbane	-27.469	153.023	Rectal swab	Homo sapiens		IncFII(K)_1, CP000648, |IncFIB(K)_1, JN233704,	IncF RST(K1:A-:B-):FIA(-);FIB(-);FIC(-);FII(-);FIIK(1);FIIS(-);FIIY(-)	216803	52.3503	Klebsiella pneumoniae	Klebsiella pneumoniae (573)	Klebsiella (570)	Enterobacteriaceae (543)	Enterobacterales (91347)	Gammaproteobacteria (1236)	Proteobacteria (1224)	Bacteria (2)	5.96103	7.85386
NZ_LR745043.1	0.0613264	0	160	128	linear	2020-01-09					urine			repB_KLEB_VIR, AP006726, |IncHI1B(pNDM-MAR)_1, JN420336,	IncHI1 MLST(-):HCM1_043(-);HCM1_064(-);HCM1_099(-);HCM1_116(-);HCM1_178ac(-);HCM1_259(-);(-)	215306	50.4422	Klebsiella pneumoniae	Klebsiella pneumoniae (573)	Klebsiella (570)	Enterobacteriaceae (543)	Enterobacterales (91347)	Gammaproteobacteria (1236)	Proteobacteria (1224)	Bacteria (2)	15.3309	0.945156
NZ_CP027425.1	0.0613264	0	160	129	circular	2018-03-14	USA:DC	USA,DC	38.8937	-76.9879	urine catheter	Homo sapiens		IncFIB(K)_1, JN233704, |IncFII(K)_1, CP000648,	IncF RST(K1:A-:B-):FIA(-);FIB(-);FIC(-);FII(-);FIIK(1);FIIS(-);FIIY(-)	195881	52.4992	Klebsiella oxytoca	Klebsiella oxytoca (571)	Klebsiella (570)	Enterobacteriaceae (543)	Enterobacterales (91347)	Gammaproteobacteria (1236)	Proteobacteria (1224)	Bacteria (2)	5.91025	7.889
CP050281.1	0.0613264	0	160	130	circular	2020-03-29	China:Nanchang		28.41	115.54	blood	Homo sapiens		repB_KLEB_VIR, AP006726, |IncHI1B(pNDM-MAR)_1, JN420336,	IncHI1 MLST(-):HCM1_043(-);HCM1_064(-);HCM1_099(-);HCM1_116(-);HCM1_178ac(-);HCM1_259(-);(-)	237416	49.8172	Klebsiella pneumoniae	Klebsiella pneumoniae (573)	Klebsiella (570)	Enterobacteriaceae (543)	Enterobacterales (91347)	Gammaproteobacteria (1236)	Proteobacteria (1224)	Bacteria (2)	15.1042	1.16685
NZ_CP052037.1	0.0613264	0	160	131	circular	2020-06-03	China	China	34.4118	86.0327	blood		tiss sample	repB_KLEB_VIR, AP006726, |IncHI1B(pNDM-MAR)_1, JN420336,	IncHI1 MLST(-):HCM1_043(-);HCM1_064(-);HCM1_099(-);HCM1_116(-);HCM1_178ac(-);HCM1_259(-);(-)	207560	50.1633	Klebsiella pneumoniae	Klebsiella pneumoniae (573)	Klebsiella (570)	Enterobacteriaceae (543)	Enterobacterales (91347)	Gammaproteobacteria (1236)	Proteobacteria (1224)	Bacteria (2)	15.3064	0.972798
NZ_CP034776.1	0.0613264	0	160	132	circular	2019-03-12	Canada: Montreal		45.5017	-73.5673	rectal swab	Homo sapiens		IncHI1B(pNDM-MAR)_1, JN420336, |repB_KLEB_VIR, AP006726,	IncHI1 MLST(-):HCM1_043(-);HCM1_064(-);HCM1_099(-);HCM1_116(-);HCM1_178ac(-);HCM1_259(-);(-)	218147	50.4637	Klebsiella pneumoniae	Klebsiella pneumoniae (573)	Klebsiella (570)	Enterobacteriaceae (543)	Enterobacterales (91347)	Gammaproteobacteria (1236)	Proteobacteria (1224)	Bacteria (2)	15.3196	0.957714
NZ_MH643786.1	0.0613264	0	160	133	circular	2020-11-04								IncHI1B(pNDM-MAR)_1, JN420336, |repB_KLEB_VIR, AP006726,	IncHI1 MLST(-):HCM1_043(-);HCM1_064(-);HCM1_099(-);HCM1_116(-);HCM1_178ac(-);HCM1_259(-);(-)	214938	49.9651	Klebsiella pneumoniae subsp. pneumoniae	Klebsiella pneumoniae (573)	Klebsiella (570)	Enterobacteriaceae (543)	Enterobacterales (91347)	Gammaproteobacteria (1236)	Proteobacteria (1224)	Bacteria (2)	15.1047	1.16252
NZ_CP064236.1	0.0613264	0	160	134	circular	2020-11-12	China:Nanchang	China,Nanchang	28.6793	115.889		Homo sapiens	whole organism	IncHI1B(pNDM-MAR)_1, JN420336, |repB_KLEB_VIR, AP006726,	IncHI1 MLST(-):HCM1_043(-);HCM1_064(-);HCM1_099(-);HCM1_116(-);HCM1_178ac(-);HCM1_259(-);(-)	219405	49.9897	Klebsiella pneumoniae	Klebsiella pneumoniae (573)	Klebsiella (570)	Enterobacteriaceae (543)	Enterobacterales (91347)	Gammaproteobacteria (1236)	Proteobacteria (1224)	Bacteria (2)	15.1255	1.14193
NZ_MN200128.1	0.0613264	0	160	135	circular	2020-08-04								repB_KLEB_VIR, AP006726, |IncHI1B(pNDM-MAR)_1, JN420336,	IncHI1 MLST(-):HCM1_043(-);HCM1_064(-);HCM1_099(-);HCM1_116(-);HCM1_178ac(-);HCM1_259(-);(-)	215723	50.449	Klebsiella pneumoniae	Klebsiella pneumoniae (573)	Klebsiella (570)	Enterobacteriaceae (543)	Enterobacterales (91347)	Gammaproteobacteria (1236)	Proteobacteria (1224)	Bacteria (2)	15.3054	0.973927
NZ_CP026283.1	0.0615839	0	159	136	circular	2018-02-01	USA		38.9847	-77.0947				IncR_1, DQ449578,		125961	51.6128	Klebsiella oxytoca	Klebsiella oxytoca (571)	Klebsiella (570)	Enterobacteriaceae (543)	Enterobacterales (91347)	Gammaproteobacteria (1236)	Proteobacteria (1224)	Bacteria (2)	5.57357	7.62781
NZ_CP026587.1	0.0615839	0	159	137	circular	2018-03-01	China:Nanchang	China,Nanchang	28.6793	115.889		Homo sapiens	tissue sample	IncHI1B(pNDM-MAR)_1, JN420336, |repB_KLEB_VIR, AP006726,	IncHI1 MLST(-):HCM1_043(-);HCM1_064(-);HCM1_099(-);HCM1_116(-);HCM1_178ac(-);HCM1_259(-);(-)	215697	50.4536	Klebsiella pneumoniae	Klebsiella pneumoniae (573)	Klebsiella (570)	Enterobacteriaceae (543)	Enterobacterales (91347)	Gammaproteobacteria (1236)	Proteobacteria (1224)	Bacteria (2)	15.2967	0.981499
NZ_AP022144.1	0.0615839	0	159	138	circular	2020-08-13	Japan:Tokyo		35.6538	139.513				IncFIB(K)(pCAV1099-114)_1, CP011596,	IncF RST(F-:A-:B-):FIA(-);FIB(-);FIC(-);FII(-);FIIK(-);FIIS(-);FIIY(-)	182573	50.244	Klebsiella quasipneumoniae	Klebsiella quasipneumoniae (1463165)	Klebsiella (570)	Enterobacteriaceae (543)	Enterobacterales (91347)	Gammaproteobacteria (1236)	Proteobacteria (1224)	Bacteria (2)	5.14896	7.99181
NZ_MN423363.1	0.0615839	0	159	139	circular	2020-09-24								IncFIB(K)(pCAV1099-114)_1, CP011596,	IncF RST(F-:A-:B-):FIA(-);FIB(-);FIC(-);FII(-);FIIK(-);FIIS(-);FIIY(-)	181765	51.8329	Klebsiella pneumoniae	Klebsiella pneumoniae (573)	Klebsiella (570)	Enterobacteriaceae (543)	Enterobacterales (91347)	Gammaproteobacteria (1236)	Proteobacteria (1224)	Bacteria (2)	5.13146	7.97251
NZ_CP037966.1	0.0615839	0	159	140	circular	2019-03-15	China: Sichuan	China,Sichuan	30.5	102.5		Homo sapiens	Culture	IncFIB(K)_1, JN233704, |IncFII(K)_1, CP000648,	IncF RST(K1:A-:B-):FIA(-);FIB(-);FIC(-);FII(-);FIIK(1);FIIS(-);FIIY(-)	179816	52.2184	Klebsiella pneumoniae	Klebsiella pneumoniae (573)	Klebsiella (570)	Enterobacteriaceae (543)	Enterobacterales (91347)	Gammaproteobacteria (1236)	Proteobacteria (1224)	Bacteria (2)	5.92287	7.87975
NZ_CP028784.1	0.0615839	0	159	141	circular	2018-04-05	China: Leshan, Sichuan	China,Leshan,Sichuan	29.5644	103.762	pus	Homo sapiens	Culture	IncFIB(K)_1, JN233704, |IncFII(K)_1, CP000648,	IncF RST(K1:A-:B-):FIA(-);FIB(-);FIC(-);FII(-);FIIK(1);FIIS(-);FIIY(-)	182097	52.1585	Klebsiella pneumoniae	Klebsiella pneumoniae (573)	Klebsiella (570)	Enterobacteriaceae (543)	Enterobacterales (91347)	Gammaproteobacteria (1236)	Proteobacteria (1224)	Bacteria (2)	5.94776	7.8608
NZ_CP016815.1	0.0618432	0	158	142	circular	2016-08-25	Taiwan	Taiwan	23.5983	120.835	blood	Homo sapiens	whole organism	repB_KLEB_VIR, AP006726, |IncHI1B(pNDM-MAR)_1, JN420336,	IncHI1 MLST(-):HCM1_043(-);HCM1_064(-);HCM1_099(-);HCM1_116(-);HCM1_178ac(-);HCM1_259(-);(-)	212770	50.1015	Klebsiella pneumoniae	Klebsiella pneumoniae (573)	Klebsiella (570)	Enterobacteriaceae (543)	Enterobacterales (91347)	Gammaproteobacteria (1236)	Proteobacteria (1224)	Bacteria (2)	15.3305	1.0088
NZ_CP053766.1	0.0618432	0	158	143	circular	2020-05-26	India		12.9246	79.1348	blood	Homo sapiens		IncFIB(pNDM-Mar)_1, JN420336, |IncHI1B(pNDM-MAR)_1, JN420336,	IncF RST(F-:A-:B-):FIA(-);FIB(-);FIC(-);FII(-);FIIK(-);FIIS(-);FIIY(-)|IncHI1 MLST(-):HCM1_043(-);HCM1_064(-);HCM1_099(-);HCM1_116(-);HCM1_178ac(-);HCM1_259(-);(-)	307718	46.9862	Klebsiella pneumoniae	Klebsiella pneumoniae (573)	Klebsiella (570)	Enterobacteriaceae (543)	Enterobacterales (91347)	Gammaproteobacteria (1236)	Proteobacteria (1224)	Bacteria (2)	15.6486	-0.0414101
LR890465.1	0.0618432	0	158	144	circular	2020-10-30								repB_KLEB_VIR, AP006726, |IncHI1B(pNDM-MAR)_1, JN420336,	IncHI1 MLST(-):HCM1_043(-);HCM1_064(-);HCM1_099(-);HCM1_116(-);HCM1_178ac(-);HCM1_259(-);(-)	233932	50.1565	Klebsiella pneumoniae	Klebsiella pneumoniae (573)	Klebsiella (570)	Enterobacteriaceae (543)	Enterobacterales (91347)	Gammaproteobacteria (1236)	Proteobacteria (1224)	Bacteria (2)	15.2693	1.02364
NZ_MH643788.1	0.0618432	0	158	145	circular	2020-11-04								repB_KLEB_VIR, AP006726, |IncHI1B(pNDM-MAR)_1, JN420336,	IncHI1 MLST(-):HCM1_043(-);HCM1_064(-);HCM1_099(-);HCM1_116(-);HCM1_178ac(-);HCM1_259(-);(-)	217926	49.9917	Klebsiella pneumoniae subsp. pneumoniae	Klebsiella pneumoniae (573)	Klebsiella (570)	Enterobacteriaceae (543)	Enterobacterales (91347)	Gammaproteobacteria (1236)	Proteobacteria (1224)	Bacteria (2)	15.0935	1.17734
CP052363.1	0.0618432	0	158	146	circular	2020-05-04	South Korea: Chungbuk		36.8	127.7	blood	Homo sapiens		repB_KLEB_VIR, AP006726, |IncHI1B(pNDM-MAR)_1, JN420336,	IncHI1 MLST(-):HCM1_043(-);HCM1_064(-);HCM1_099(-);HCM1_116(-);HCM1_178ac(-);HCM1_259(-);(-)	218572	50.1812	Klebsiella pneumoniae	Klebsiella pneumoniae (573)	Klebsiella (570)	Enterobacteriaceae (543)	Enterobacterales (91347)	Gammaproteobacteria (1236)	Proteobacteria (1224)	Bacteria (2)	15.306	0.977686
NZ_CP064206.1	0.0621044	0	157	147	circular	2020-11-12	China:Nanchang	China,Nanchang	28.6793	115.889	blood		whole organism	repB_KLEB_VIR, AP006726, |IncHI1B(pNDM-MAR)_1, JN420336,	IncHI1 MLST(-):HCM1_043(-);HCM1_064(-);HCM1_099(-);HCM1_116(-);HCM1_178ac(-);HCM1_259(-);(-)	230835	50.1605	Klebsiella pneumoniae	Klebsiella pneumoniae (573)	Klebsiella (570)	Enterobacteriaceae (543)	Enterobacterales (91347)	Gammaproteobacteria (1236)	Proteobacteria (1224)	Bacteria (2)	15.3091	0.98172
NZ_AP019549.1	0.0621044	0	157	148	circular	2020-04-18	missing					Homo sapiens		repB_KLEB_VIR, AP006726, |IncHI1B(pNDM-MAR)_1, JN420336,	IncHI1 MLST(-):HCM1_043(-);HCM1_064(-);HCM1_099(-);HCM1_116(-);HCM1_178ac(-);HCM1_259(-);(-)	228290	50.099	Klebsiella pneumoniae	Klebsiella pneumoniae (573)	Klebsiella (570)	Enterobacteriaceae (543)	Enterobacterales (91347)	Gammaproteobacteria (1236)	Proteobacteria (1224)	Bacteria (2)	15.3122	0.981769
NZ_CP028852.1	0.0621044	0	157	149	circular	2020-11-10	China:Qingdao		37.09	121	sputum	Homo sapiens		IncHI1B(pNDM-MAR)_1, JN420336, |repB_KLEB_VIR, AP006726,	IncHI1 MLST(-):HCM1_043(-);HCM1_064(-);HCM1_099(-);HCM1_116(-);HCM1_178ac(-);HCM1_259(-);(-)	231431	50.1445	Klebsiella pneumoniae	Klebsiella pneumoniae (573)	Klebsiella (570)	Enterobacteriaceae (543)	Enterobacterales (91347)	Gammaproteobacteria (1236)	Proteobacteria (1224)	Bacteria (2)	15.2977	0.996598
NZ_CP025081.1	0.0621044	0	157	150	circular	2017-12-09	Singapore		1.2941	103.783	liver abscess	Homo sapiens		repB_KLEB_VIR, AP006726, |IncHI1B(pNDM-MAR)_1, JN420336,	IncHI1 MLST(-):HCM1_043(-);HCM1_064(-);HCM1_099(-);HCM1_116(-);HCM1_178ac(-);HCM1_259(-);(-)	231583	50.1535	Klebsiella pneumoniae	Klebsiella pneumoniae (573)	Klebsiella (570)	Enterobacteriaceae (543)	Enterobacterales (91347)	Gammaproteobacteria (1236)	Proteobacteria (1224)	Bacteria (2)	15.3111	0.980497
NZ_MG053312.1	0.0623675	0	156	151	circular	2020-06-03								repB_KLEB_VIR, AP006726, |IncHI1B(pNDM-MAR)_1, JN420336,	IncHI1 MLST(-):HCM1_043(-);HCM1_064(-);HCM1_099(-);HCM1_116(-);HCM1_178ac(-);HCM1_259(-);(-)	233470	50.2943	Klebsiella pneumoniae	Klebsiella pneumoniae (573)	Klebsiella (570)	Enterobacteriaceae (543)	Enterobacterales (91347)	Gammaproteobacteria (1236)	Proteobacteria (1224)	Bacteria (2)	15.3093	0.983816
AP022488.1	0.0623675	0	156	152	circular	2020-10-09	Japan:Tokyo	Japan,Tokyo	34.6969	139.405				IncFII(pECLA)_1, CP001919, |IncFIB(pECLA)_1, CP001919,	IncF RST(F-:A-:B-):FIA(-);FIB(-);FIC(-);FII(-);FIIK(-);FIIS(-);FIIY(-)	117311	52.0164	Citrobacter portucalensis	Citrobacter portucalensis (1639133)	Citrobacter (544)	Enterobacteriaceae (543)	Enterobacterales (91347)	Gammaproteobacteria (1236)	Proteobacteria (1224)	Bacteria (2)	5.10615	7.26888
CP058799.1	0.0623675	0	156	153	circular	2020-07-09	India		12.9246	79.1348	blood	Homo sapiens		IncFIB(pNDM-Mar)_1, JN420336, |IncHI1B(pNDM-MAR)_1, JN420336,	IncF RST(F-:A-:B-):FIA(-);FIB(-);FIC(-);FII(-);FIIK(-);FIIS(-);FIIY(-)|IncHI1 MLST(-):HCM1_043(-);HCM1_064(-);HCM1_099(-);HCM1_116(-);HCM1_178ac(-);HCM1_259(-);(-)	304108	46.9238	Klebsiella pneumoniae	Klebsiella pneumoniae (573)	Klebsiella (570)	Enterobacteriaceae (543)	Enterobacterales (91347)	Gammaproteobacteria (1236)	Proteobacteria (1224)	Bacteria (2)	15.6538	-0.0546327
NZ_CP063278.1	0.0623675	0	156	154	circular	2020-10-30	Russia:Moscow		55.8	37.6	Postoperative wound	Homo sapiens		repB_KLEB_VIR, AP006726, |IncHI1B(pNDM-MAR)_1, JN420336,	IncHI1 MLST(-):HCM1_043(-);HCM1_064(-);HCM1_099(-);HCM1_116(-);HCM1_178ac(-);HCM1_259(-);(-)	232362	50.111	Klebsiella pneumoniae	Klebsiella pneumoniae (573)	Klebsiella (570)	Enterobacteriaceae (543)	Enterobacterales (91347)	Gammaproteobacteria (1236)	Proteobacteria (1224)	Bacteria (2)	15.3116	0.980242
NZ_MG288682.1	0.0626325	0	155	155	circular	2020-06-03								IncFIB(pNDM-Mar)_1, JN420336,	IncF RST(F-:A-:B-):FIA(-);FIB(-);FIC(-);FII(-);FIIK(-);FIIS(-);FIIY(-)	239779	45.3276	Klebsiella aerogenes	Klebsiella aerogenes (548)	Klebsiella (570)	Enterobacteriaceae (543)	Enterobacterales (91347)	Gammaproteobacteria (1236)	Proteobacteria (1224)	Bacteria (2)	15.6602	-0.0704469
NZ_CP050823.1	0.0626325	0	155	156	circular	2020-04-08	China: Jiangsu		33.98	119.83	milk			IncFIB(K)(pCAV1099-114)_1, CP011596,	IncF RST(F-:A-:B-):FIA(-);FIB(-);FIC(-);FII(-);FIIK(-);FIIS(-);FIIY(-)	157903	50.6279	Klebsiella pneumoniae	Klebsiella pneumoniae (573)	Klebsiella (570)	Enterobacteriaceae (543)	Enterobacterales (91347)	Gammaproteobacteria (1236)	Proteobacteria (1224)	Bacteria (2)	5.19581	7.89484
NZ_CP053772.1	0.0626325	0	155	157	circular	2020-05-26	India		12.9246	79.1348	blood	Homo sapiens		IncFIB(pNDM-Mar)_1, JN420336, |IncHI1B(pNDM-MAR)_1, JN420336,	IncF RST(F-:A-:B-):FIA(-);FIB(-);FIC(-);FII(-);FIIK(-);FIIS(-);FIIY(-)|IncHI1 MLST(-):HCM1_043(-);HCM1_064(-);HCM1_099(-);HCM1_116(-);HCM1_178ac(-);HCM1_259(-);(-)	317680	47.0791	Klebsiella pneumoniae	Klebsiella pneumoniae (573)	Klebsiella (570)	Enterobacteriaceae (543)	Enterobacterales (91347)	Gammaproteobacteria (1236)	Proteobacteria (1224)	Bacteria (2)	15.6901	-0.00358808
NZ_AP022184.1	0.0626325	0	155	158	circular	2020-08-13	Japan:Tokyo		35.5619	139.753				IncFIB(K)(pCAV1099-114)_1, CP011596,	IncF RST(F-:A-:B-):FIA(-);FIB(-);FIC(-);FII(-);FIIK(-);FIIS(-);FIIY(-)	218891	51.0195	Klebsiella quasipneumoniae	Klebsiella quasipneumoniae (1463165)	Klebsiella (570)	Enterobacteriaceae (543)	Enterobacterales (91347)	Gammaproteobacteria (1236)	Proteobacteria (1224)	Bacteria (2)	5.33544	7.87112
NZ_CP014009.1	0.0626325	0	155	159	circular	2016-01-24	China: Shanghai		31.12	121.27	blood	Homo sapiens		IncHI1B(pNDM-MAR)_1, JN420336, |repB_KLEB_VIR, AP006726,	IncHI1 MLST(-):HCM1_043(-);HCM1_064(-);HCM1_099(-);HCM1_116(-);HCM1_178ac(-);HCM1_259(-);(-)	224263	50.1166	Klebsiella pneumoniae subsp. pneumoniae	Klebsiella pneumoniae (573)	Klebsiella (570)	Enterobacteriaceae (543)	Enterobacterales (91347)	Gammaproteobacteria (1236)	Proteobacteria (1224)	Bacteria (2)	15.3097	0.98155
NZ_CP033627.1	0.0626325	0	155	160	circular	2018-11-26	Italy: Aosta		45.7389	7.42619	rectal swab	Homo sapiens		IncFIB(K)_1, JN233704, |IncFII(K)_1, CP000648,	IncF RST(K1:A-:B-):FIA(-);FIB(-);FIC(-);FII(-);FIIK(1);FIIS(-);FIIY(-)	184083	52.6203	Klebsiella pneumoniae	Klebsiella pneumoniae (573)	Klebsiella (570)	Enterobacteriaceae (543)	Enterobacterales (91347)	Gammaproteobacteria (1236)	Proteobacteria (1224)	Bacteria (2)	5.95169	7.88508
NZ_CP026024.1	0.0628995	0	154	161	circular	2019-11-05	China	China	34.4118	86.0327		Homo sapiens	cell culture	IncHI1B(pNDM-MAR)_1, JN420336, |repB_KLEB_VIR, AP006726,	IncHI1 MLST(-):HCM1_043(-);HCM1_064(-);HCM1_099(-);HCM1_116(-);HCM1_178ac(-);HCM1_259(-);(-)	229796	50.1031	Klebsiella pneumoniae	Klebsiella pneumoniae (573)	Klebsiella (570)	Enterobacteriaceae (543)	Enterobacterales (91347)	Gammaproteobacteria (1236)	Proteobacteria (1224)	Bacteria (2)	15.3121	0.984336
NZ_CP064209.1	0.0628995	0	154	162	circular	2020-11-12	China:Nanchang	China,Nanchang	28.6793	115.889	blood		whole organism	IncHI1B(pNDM-MAR)_1, JN420336, |repB_KLEB_VIR, AP006726,	IncHI1 MLST(-):HCM1_043(-);HCM1_064(-);HCM1_099(-);HCM1_116(-);HCM1_178ac(-);HCM1_259(-);(-)	228028	50.0592	Klebsiella pneumoniae	Klebsiella pneumoniae (573)	Klebsiella (570)	Enterobacteriaceae (543)	Enterobacterales (91347)	Gammaproteobacteria (1236)	Proteobacteria (1224)	Bacteria (2)	15.3124	0.980532
NC_005249.1	0.0628995	0	154	163	circular	2003-12-03								repB_KLEB_VIR, AP006726, |IncHI1B(pNDM-MAR)_1, JN420336,	IncHI1 MLST(-):HCM1_043(-);HCM1_064(-);HCM1_099(-);HCM1_116(-);HCM1_178ac(-);HCM1_259(-);(-)	219385	50.3471	Klebsiella pneumoniae CG43	Klebsiella pneumoniae (573)	Klebsiella (570)	Enterobacteriaceae (543)	Enterobacterales (91347)	Gammaproteobacteria (1236)	Proteobacteria (1224)	Bacteria (2)	15.3023	0.980187
NZ_CP045662.1	0.0628995	0	154	164	circular	2019-11-08	Japan	Japan	36.5748	139.239	blood from patient with community-acquired emphysematous osteomyelitis	Homo sapiens	Culture	IncFIB(K)(pCAV1099-114)_1, CP011596,	IncF RST(F-:A-:B-):FIA(-);FIB(-);FIC(-);FII(-);FIIK(-);FIIS(-);FIIY(-)	143263	50.9978	Klebsiella pneumoniae	Klebsiella pneumoniae (573)	Klebsiella (570)	Enterobacteriaceae (543)	Enterobacterales (91347)	Gammaproteobacteria (1236)	Proteobacteria (1224)	Bacteria (2)	5.17812	7.93528
NZ_LR745046.1	0.0631684	0	153	165	linear	2020-01-09					stool			repB_KLEB_VIR, AP006726, |IncHI1B(pNDM-MAR)_1, JN420336,	IncHI1 MLST(-):HCM1_043(-);HCM1_064(-);HCM1_099(-);HCM1_116(-);HCM1_178ac(-);HCM1_259(-);(-)	226671	50.2199	Klebsiella pneumoniae	Klebsiella pneumoniae (573)	Klebsiella (570)	Enterobacteriaceae (543)	Enterobacterales (91347)	Gammaproteobacteria (1236)	Proteobacteria (1224)	Bacteria (2)	15.3151	0.961396
NZ_CP021856.1	0.0631684	0	153	166	circular	2017-06-21	missing				missing	missing		IncFIB(K)_1, JN233704,	IncF RST(F-:A-:B-):FIA(-);FIB(-);FIC(-);FII(-);FIIK(-);FIIS(-);FIIY(-)	146168	53.0184	Klebsiella pneumoniae	Klebsiella pneumoniae (573)	Klebsiella (570)	Enterobacteriaceae (543)	Enterobacterales (91347)	Gammaproteobacteria (1236)	Proteobacteria (1224)	Bacteria (2)	5.80747	7.80648
NZ_CP060282.1	0.0631684	0	153	167	circular	2020-08-28	Singapore		1.3213	103.846	Rectal Swab	Homo sapiens		repB_KLEB_VIR, AP006726, |IncHI1B(pNDM-MAR)_1, JN420336,	IncHI1 MLST(-):HCM1_043(-);HCM1_064(-);HCM1_099(-);HCM1_116(-);HCM1_178ac(-);HCM1_259(-);(-)	237444	50.0531	Klebsiella pneumoniae	Klebsiella pneumoniae (573)	Klebsiella (570)	Enterobacteriaceae (543)	Enterobacterales (91347)	Gammaproteobacteria (1236)	Proteobacteria (1224)	Bacteria (2)	15.3105	0.950209
NZ_CP007734.1	0.0631684	0	153	168	circular	2015-02-17	USA	USA	39.7837	-100.446	groin		missing	IncFIB(K)_1, JN233704, |IncFII(K)_1, CP000648,	IncF RST(K20:A-:B-):FIA(-);FIB(-);FIC(-);FII(-);FIIK(20);FIIS(-);FIIY(-)	338850	52.721	Klebsiella pneumoniae subsp. pneumoniae KPNIH27	Klebsiella pneumoniae (573)	Klebsiella (570)	Enterobacteriaceae (543)	Enterobacterales (91347)	Gammaproteobacteria (1236)	Proteobacteria (1224)	Bacteria (2)	5.70435	7.24678
NZ_LR130542.1	0.0631684	0	153	169	linear	2019-01-10					urine			IncFIB(K)_1, JN233704, |IncFII(K)_1, CP000648,	IncF RST(K1:A-:B-):FIA(-);FIB(-);FIC(-);FII(-);FIIK(1);FIIS(-);FIIY(-)	202379	53.1226	Klebsiella pneumoniae	Klebsiella pneumoniae (573)	Klebsiella (570)	Enterobacteriaceae (543)	Enterobacterales (91347)	Gammaproteobacteria (1236)	Proteobacteria (1224)	Bacteria (2)	5.93072	7.91716
NZ_CP063905.1	0.0631684	0	153	170	circular	2020-11-10	China:Tangshan		39.36	118.11	Human fecal samples			repB_KLEB_VIR, AP006726, |IncHI1B(pNDM-MAR)_1, JN420336,	IncHI1 MLST(-):HCM1_043(-);HCM1_064(-);HCM1_099(-);HCM1_116(-);HCM1_178ac(-);HCM1_259(-);(-)	226993	50.2355	Klebsiella pneumoniae	Klebsiella pneumoniae (573)	Klebsiella (570)	Enterobacteriaceae (543)	Enterobacterales (91347)	Gammaproteobacteria (1236)	Proteobacteria (1224)	Bacteria (2)	15.3442	0.974854
NZ_CP064230.1	0.0634394	0	152	171	circular	2020-11-12	China:Nanchang	China,Nanchang	28.6793	115.889		Homo sapiens	whole organism	IncHI1B(pNDM-MAR)_1, JN420336, |repB_KLEB_VIR, AP006726,	IncHI1 MLST(-):HCM1_043(-);HCM1_064(-);HCM1_099(-);HCM1_116(-);HCM1_178ac(-);HCM1_259(-);(-)	228974	50.0852	Klebsiella pneumoniae	Klebsiella pneumoniae (573)	Klebsiella (570)	Enterobacteriaceae (543)	Enterobacterales (91347)	Gammaproteobacteria (1236)	Proteobacteria (1224)	Bacteria (2)	15.3109	0.982969
CP052495.1	0.0634394	0	152	172	circular	2020-05-04	South Korea: Gyeonggi		37.66	126.77	blood	Homo sapiens		repB_KLEB_VIR, AP006726, |IncHI1B(pNDM-MAR)_1, JN420336,	IncHI1 MLST(-):HCM1_043(-);HCM1_064(-);HCM1_099(-);HCM1_116(-);HCM1_178ac(-);HCM1_259(-);(-)	231026	50.0511	Klebsiella pneumoniae	Klebsiella pneumoniae (573)	Klebsiella (570)	Enterobacteriaceae (543)	Enterobacterales (91347)	Gammaproteobacteria (1236)	Proteobacteria (1224)	Bacteria (2)	15.2741	1.02383
CP052259.1	0.0634394	0	152	173	circular	2020-05-04	South Korea: Jeonnam		34.87	126.99	blood	Homo sapiens		repB_KLEB_VIR, AP006726, |IncHI1B(pNDM-MAR)_1, JN420336,	IncHI1 MLST(-):HCM1_043(-);HCM1_064(-);HCM1_099(-);HCM1_116(-);HCM1_178ac(-);HCM1_259(-);(-)	236911	50.0238	Klebsiella pneumoniae	Klebsiella pneumoniae (573)	Klebsiella (570)	Enterobacteriaceae (543)	Enterobacterales (91347)	Gammaproteobacteria (1236)	Proteobacteria (1224)	Bacteria (2)	15.3134	0.965843
NZ_CP056831.1	0.0634394	0	152	174	circular	2020-08-03	United Kingdom	United Kingdom	54.7024	-3.27658	Wastewater influent sample		culture	IncFIB(K)_1, JN233704,	IncF RST(F-:A-:B-):FIA(-);FIB(-);FIC(-);FII(-);FIIK(-);FIIS(-);FIIY(-)	152250	52.8585	Klebsiella pneumoniae	Klebsiella pneumoniae (573)	Klebsiella (570)	Enterobacteriaceae (543)	Enterobacterales (91347)	Gammaproteobacteria (1236)	Proteobacteria (1224)	Bacteria (2)	5.92723	7.83763
NZ_CP041935.1	0.0634394	0	152	175	circular	2019-07-24	China:Beijing		39.92	116.46	blood	Homo sapiens		IncFIB(pNDM-Mar)_1, JN420336, |IncHI1B(pNDM-MAR)_1, JN420336,	IncF RST(F-:A-:B-):FIA(-);FIB(-);FIC(-);FII(-);FIIK(-);FIIS(-);FIIY(-)|IncHI1 MLST(-):HCM1_043(-);HCM1_064(-);HCM1_099(-);HCM1_116(-);HCM1_178ac(-);HCM1_259(-);(-)	287790	47.3498	Klebsiella pneumoniae	Klebsiella pneumoniae (573)	Klebsiella (570)	Enterobacteriaceae (543)	Enterobacterales (91347)	Gammaproteobacteria (1236)	Proteobacteria (1224)	Bacteria (2)	15.655	-0.0682131
NZ_CP034083.1	0.0634394	0	152	176	circular	2018-12-04	China	China	34.4118	86.0327	missing	Homo sapiens	cell culture	repB_KLEB_VIR, AP006726, |IncHI1B(pNDM-MAR)_1, JN420336,	IncHI1 MLST(-):HCM1_043(-);HCM1_064(-);HCM1_099(-);HCM1_116(-);HCM1_178ac(-);HCM1_259(-);(-)	229648	50.084	Klebsiella pneumoniae subsp. pneumoniae	Klebsiella pneumoniae (573)	Klebsiella (570)	Enterobacteriaceae (543)	Enterobacterales (91347)	Gammaproteobacteria (1236)	Proteobacteria (1224)	Bacteria (2)	15.3092	0.983682
CP052159.1	0.0634394	0	152	177	circular	2020-05-04	South Korea: Busan		35.18	129.08	blood	Homo sapiens		repB_KLEB_VIR, AP006726, |IncHI1B(pNDM-MAR)_1, JN420336,	IncHI1 MLST(-):HCM1_043(-);HCM1_064(-);HCM1_099(-);HCM1_116(-);HCM1_178ac(-);HCM1_259(-);(-)	228970	50.0664	Klebsiella pneumoniae	Klebsiella pneumoniae (573)	Klebsiella (570)	Enterobacteriaceae (543)	Enterobacterales (91347)	Gammaproteobacteria (1236)	Proteobacteria (1224)	Bacteria (2)	15.3102	0.980668
NZ_CP024708.1	0.0634394	0	152	178	circular	2018-12-12	China:beijing		39.9833	116.361	blood	Homo sapiens		IncHI1B(pNDM-MAR)_1, JN420336, |repB_KLEB_VIR, AP006726,	IncHI1 MLST(-):HCM1_043(-);HCM1_064(-);HCM1_099(-);HCM1_116(-);HCM1_178ac(-);HCM1_259(-);(-)	237216	50.0358	Klebsiella pneumoniae	Klebsiella pneumoniae (573)	Klebsiella (570)	Enterobacteriaceae (543)	Enterobacterales (91347)	Gammaproteobacteria (1236)	Proteobacteria (1224)	Bacteria (2)	15.3086	0.954409
CP052357.1	0.0634394	0	152	179	circular	2020-05-04	South Korea: Chungbuk		36.8	127.7	blood	Homo sapiens		repB_KLEB_VIR, AP006726, |IncHI1B(pNDM-MAR)_1, JN420336,	IncHI1 MLST(-):HCM1_043(-);HCM1_064(-);HCM1_099(-);HCM1_116(-);HCM1_178ac(-);HCM1_259(-);(-)	231094	50.0389	Klebsiella pneumoniae	Klebsiella pneumoniae (573)	Klebsiella (570)	Enterobacteriaceae (543)	Enterobacterales (91347)	Gammaproteobacteria (1236)	Proteobacteria (1224)	Bacteria (2)	15.3194	0.971597
NZ_CP037743.1	0.0634394	0	152	180	circular	2019-05-03	USA: MN	USA,MN	45.9897	-94.6113	urine	Homo sapiens		repB_KLEB_VIR, AP006726, |IncHI1B(pNDM-MAR)_1, JN420336,	IncHI1 MLST(-):HCM1_043(-);HCM1_064(-);HCM1_099(-);HCM1_116(-);HCM1_178ac(-);HCM1_259(-);(-)	227239	50.0676	Klebsiella pneumoniae	Klebsiella pneumoniae (573)	Klebsiella (570)	Enterobacteriaceae (543)	Enterobacterales (91347)	Gammaproteobacteria (1236)	Proteobacteria (1224)	Bacteria (2)	15.3098	0.98253
NZ_CP014011.1	0.0634394	0	152	181	circular	2016-01-24	China: Shanghai		31.12	121.27	blood	Homo sapiens		IncHI1B(pNDM-MAR)_1, JN420336, |repB_KLEB_VIR, AP006726,	IncHI1 MLST(-):HCM1_043(-);HCM1_064(-);HCM1_099(-);HCM1_116(-);HCM1_178ac(-);HCM1_259(-);(-)	228907	50.0968	Klebsiella pneumoniae subsp. pneumoniae	Klebsiella pneumoniae (573)	Klebsiella (570)	Enterobacteriaceae (543)	Enterobacterales (91347)	Gammaproteobacteria (1236)	Proteobacteria (1224)	Bacteria (2)	15.307	0.985703
NZ_CP064233.1	0.0634394	0	152	182	circular	2020-11-12	China:Nanchang	China,Nanchang	28.6793	115.889		Homo sapiens	whole organism	repB_KLEB_VIR, AP006726, |IncHI1B(pNDM-MAR)_1, JN420336,	IncHI1 MLST(-):HCM1_043(-);HCM1_064(-);HCM1_099(-);HCM1_116(-);HCM1_178ac(-);HCM1_259(-);(-)	228973	50.0854	Klebsiella pneumoniae	Klebsiella pneumoniae (573)	Klebsiella (570)	Enterobacteriaceae (543)	Enterobacterales (91347)	Gammaproteobacteria (1236)	Proteobacteria (1224)	Bacteria (2)	15.3081	0.98316
NZ_MF398271.1	0.0637124	0	151	183	circular	2020-06-03								repB_KLEB_VIR, AP006726, |IncHI1B(pNDM-MAR)_1, JN420336,	IncHI1 MLST(-):HCM1_043(-);HCM1_064(-);HCM1_099(-);HCM1_116(-);HCM1_178ac(-);HCM1_259(-);(-)	238153	50.2925	Klebsiella pneumoniae subsp. pneumoniae	Klebsiella pneumoniae (573)	Klebsiella (570)	Enterobacteriaceae (543)	Enterobacterales (91347)	Gammaproteobacteria (1236)	Proteobacteria (1224)	Bacteria (2)	15.3203	0.97119
CP052317.1	0.0637124	0	151	184	circular	2020-05-04	South Korea: Jeonnam		34.87	126.99	blood	Homo sapiens		repB_KLEB_VIR, AP006726,		67298	50.4814	Klebsiella pneumoniae	Klebsiella pneumoniae (573)	Klebsiella (570)	Enterobacteriaceae (543)	Enterobacterales (91347)	Gammaproteobacteria (1236)	Proteobacteria (1224)	Bacteria (2)	4.91358	8.06137
CP052204.1	0.0637124	0	151	185	circular	2020-05-04	South Korea: Busan		35.18	129.08	blood	Homo sapiens		repB_KLEB_VIR, AP006726, |IncHI1B(pNDM-MAR)_1, JN420336,	IncHI1 MLST(-):HCM1_043(-);HCM1_064(-);HCM1_099(-);HCM1_116(-);HCM1_178ac(-);HCM1_259(-);(-)	229504	50.0261	Klebsiella pneumoniae	Klebsiella pneumoniae (573)	Klebsiella (570)	Enterobacteriaceae (543)	Enterobacterales (91347)	Gammaproteobacteria (1236)	Proteobacteria (1224)	Bacteria (2)	15.31	0.985059
NZ_CP047676.1	0.0637124	0	151	186	circular	2020-01-23	South Korea: Seoul		37.541	125.98	liver abscess	Homo sapiens		repB_KLEB_VIR, AP006726, |IncHI1B(pNDM-MAR)_1, JN420336,	IncHI1 MLST(-):HCM1_043(-);HCM1_064(-);HCM1_099(-);HCM1_116(-);HCM1_178ac(-);HCM1_259(-);(-)	229024	50.0341	Klebsiella pneumoniae subsp. pneumoniae	Klebsiella pneumoniae (573)	Klebsiella (570)	Enterobacteriaceae (543)	Enterobacterales (91347)	Gammaproteobacteria (1236)	Proteobacteria (1224)	Bacteria (2)	15.3353	0.956796
CP052304.1	0.0637124	0	151	187	circular	2020-05-04	South Korea: Jeonnam		34.87	126.99	blood	Homo sapiens		repB_KLEB_VIR, AP006726, |IncHI1B(pNDM-MAR)_1, JN420336,	IncHI1 MLST(-):HCM1_043(-);HCM1_064(-);HCM1_099(-);HCM1_116(-);HCM1_178ac(-);HCM1_259(-);(-)	230603	50.008	Klebsiella pneumoniae	Klebsiella pneumoniae (573)	Klebsiella (570)	Enterobacteriaceae (543)	Enterobacterales (91347)	Gammaproteobacteria (1236)	Proteobacteria (1224)	Bacteria (2)	15.3352	0.97392
NZ_CP047678.1	0.0637124	0	151	188	circular	2020-01-23	South Korea: Seoul		37.541	125.98	stool	Homo sapiens		repB_KLEB_VIR, AP006726, |IncHI1B(pNDM-MAR)_1, JN420336,	IncHI1 MLST(-):HCM1_043(-);HCM1_064(-);HCM1_099(-);HCM1_116(-);HCM1_178ac(-);HCM1_259(-);(-)	229024	50.0345	Klebsiella pneumoniae subsp. pneumoniae	Klebsiella pneumoniae (573)	Klebsiella (570)	Enterobacteriaceae (543)	Enterobacterales (91347)	Gammaproteobacteria (1236)	Proteobacteria (1224)	Bacteria (2)	15.3	0.97901
NZ_CP026154.1	0.0637124	0	151	189	linear	2019-02-01	China: Fujian Province		26.0939	119.313	sputum	Homo sapiens		IncFIB(K)(pCAV1099-114)_1, CP011596,	IncF RST(F-:A-:B-):FIA(-);FIB(-);FIC(-);FII(-);FIIK(-);FIIS(-);FIIY(-)	305552	53.064	Klebsiella pneumoniae	Klebsiella pneumoniae (573)	Klebsiella (570)	Enterobacteriaceae (543)	Enterobacterales (91347)	Gammaproteobacteria (1236)	Proteobacteria (1224)	Bacteria (2)	5.13539	8.02648
NZ_CP063891.1	0.0637124	0	151	190	circular	2020-11-10	China:Tangshan		39.36	118.11	Human fecal samples			repB_KLEB_VIR, AP006726, |IncHI1B(pNDM-MAR)_1, JN420336,	IncHI1 MLST(-):HCM1_043(-);HCM1_064(-);HCM1_099(-);HCM1_116(-);HCM1_178ac(-);HCM1_259(-);(-)	227749	50.0252	Klebsiella pneumoniae	Klebsiella pneumoniae (573)	Klebsiella (570)	Enterobacteriaceae (543)	Enterobacterales (91347)	Gammaproteobacteria (1236)	Proteobacteria (1224)	Bacteria (2)	15.3064	0.989087
CP052190.1	0.0637124	0	151	191	circular	2020-05-04	South Korea: Busan		35.18	129.08	blood	Homo sapiens		repB_KLEB_VIR, AP006726, |IncHI1B(pNDM-MAR)_1, JN420336,	IncHI1 MLST(-):HCM1_043(-);HCM1_064(-);HCM1_099(-);HCM1_116(-);HCM1_178ac(-);HCM1_259(-);(-)	229513	50.0294	Klebsiella pneumoniae	Klebsiella pneumoniae (573)	Klebsiella (570)	Enterobacteriaceae (543)	Enterobacterales (91347)	Gammaproteobacteria (1236)	Proteobacteria (1224)	Bacteria (2)	15.3105	0.980124
NZ_CP063909.1	0.0637124	0	151	192	circular	2020-11-10	China:Tangshan		39.36	118.11	Human fecal samples			IncHI1B(pNDM-MAR)_1, JN420336, |repB_KLEB_VIR, AP006726,	IncHI1 MLST(-):HCM1_043(-);HCM1_064(-);HCM1_099(-);HCM1_116(-);HCM1_178ac(-);HCM1_259(-);(-)	214844	49.7528	Klebsiella pneumoniae	Klebsiella pneumoniae (573)	Klebsiella (570)	Enterobacteriaceae (543)	Enterobacterales (91347)	Gammaproteobacteria (1236)	Proteobacteria (1224)	Bacteria (2)	15.3101	0.985702
CP052563.1	0.0637124	0	151	193	circular	2020-05-04	South Korea: Seoul		37.57	126.98	blood	Homo sapiens		repB_KLEB_VIR, AP006726, |IncHI1B(pNDM-MAR)_1, JN420336,	IncHI1 MLST(-):HCM1_043(-);HCM1_064(-);HCM1_099(-);HCM1_116(-);HCM1_178ac(-);HCM1_259(-);(-)	228146	50.0338	Klebsiella pneumoniae	Klebsiella pneumoniae (573)	Klebsiella (570)	Enterobacteriaceae (543)	Enterobacterales (91347)	Gammaproteobacteria (1236)	Proteobacteria (1224)	Bacteria (2)	15.3109	0.98042
NZ_MN423364.1	0.0637124	0	151	194	circular	2020-09-23								IncFIB(K)(pCAV1099-114)_1, CP011596,	IncF RST(F-:A-:B-):FIA(-);FIB(-);FIC(-);FII(-);FIIK(-);FIIS(-);FIIY(-)	244456	51.559	Klebsiella pneumoniae	Klebsiella pneumoniae (573)	Klebsiella (570)	Enterobacteriaceae (543)	Enterobacterales (91347)	Gammaproteobacteria (1236)	Proteobacteria (1224)	Bacteria (2)	5.15488	8.01751
NZ_LR134257.1	0.0637124	0	151	195	circular	2018-12-19					urine			repB_KLEB_VIR, AP006726, |IncHI1B(pNDM-MAR)_1, JN420336,	IncHI1 MLST(-):HCM1_043(-);HCM1_064(-);HCM1_099(-);HCM1_116(-);HCM1_178ac(-);HCM1_259(-);(-)	224165	50.1675	Klebsiella aerogenes	Klebsiella aerogenes (548)	Klebsiella (570)	Enterobacteriaceae (543)	Enterobacterales (91347)	Gammaproteobacteria (1236)	Proteobacteria (1224)	Bacteria (2)	15.3103	0.9819
CP052144.1	0.0637124	0	151	196	circular	2020-05-04	South Korea: Busan		35.18	129.08	blood	Homo sapiens		repB_KLEB_VIR, AP006726, |IncHI1B(pNDM-MAR)_1, JN420336,	IncHI1 MLST(-):HCM1_043(-);HCM1_064(-);HCM1_099(-);HCM1_116(-);HCM1_178ac(-);HCM1_259(-);(-)	229470	50.0331	Klebsiella pneumoniae	Klebsiella pneumoniae (573)	Klebsiella (570)	Enterobacteriaceae (543)	Enterobacterales (91347)	Gammaproteobacteria (1236)	Proteobacteria (1224)	Bacteria (2)	15.3103	0.983154
CP052163.1	0.0637124	0	151	197	circular	2020-05-04	South Korea: Busan		35.18	129.08	blood	Homo sapiens		repB_KLEB_VIR, AP006726, |IncHI1B(pNDM-MAR)_1, JN420336,	IncHI1 MLST(-):HCM1_043(-);HCM1_064(-);HCM1_099(-);HCM1_116(-);HCM1_178ac(-);HCM1_259(-);(-)	232142	50.0103	Klebsiella pneumoniae	Klebsiella pneumoniae (573)	Klebsiella (570)	Enterobacteriaceae (543)	Enterobacterales (91347)	Gammaproteobacteria (1236)	Proteobacteria (1224)	Bacteria (2)	15.3056	0.988206
NZ_CP058132.1	0.0639874	0	150	198	circular	2020-07-30	United Kingdom	United Kingdom	54.7024	-3.27658	Wastewater influent sample		culture	IncFIB(K)_1, JN233704, |IncFII(K)_1, CP000648,	IncF RST(K8:A-:B-):FIA(-);FIB(-);FIC(-);FII(-);FIIK(8);FIIS(-);FIIY(-)	199458	52.395	Klebsiella quasipneumoniae	Klebsiella quasipneumoniae (1463165)	Klebsiella (570)	Enterobacteriaceae (543)	Enterobacterales (91347)	Gammaproteobacteria (1236)	Proteobacteria (1224)	Bacteria (2)	5.61957	7.31529
NZ_CP026012.1	0.0639874	0	150	199	circular	2019-11-05	China	China	34.4118	86.0327		Homo sapiens	cell culture	IncHI1B(pNDM-MAR)_1, JN420336, |repB_KLEB_VIR, AP006726,	IncHI1 MLST(-):HCM1_043(-);HCM1_064(-);HCM1_099(-);HCM1_116(-);HCM1_178ac(-);HCM1_259(-);(-)	224152	50.1691	Klebsiella pneumoniae	Klebsiella pneumoniae (573)	Klebsiella (570)	Enterobacteriaceae (543)	Enterobacterales (91347)	Gammaproteobacteria (1236)	Proteobacteria (1224)	Bacteria (2)	15.3107	0.990573
NC_006625.1	0.0639874	0	150	200	circular	2005-01-13					isolated from blood of a patient with liver abscess and meningitis			repB_KLEB_VIR, AP006726, |IncHI1B(pNDM-MAR)_1, JN420336,	IncHI1 MLST(-):HCM1_043(-);HCM1_064(-);HCM1_099(-);HCM1_116(-);HCM1_178ac(-);HCM1_259(-);(-)	224152	50.1682	Klebsiella pneumoniae subsp. pneumoniae NTUH-K2044	Klebsiella pneumoniae (573)	Klebsiella (570)	Enterobacteriaceae (543)	Enterobacterales (91347)	Gammaproteobacteria (1236)	Proteobacteria (1224)	Bacteria (2)	15.314	0.979925
NZ_CP041100.1	0.0639874	0	150	201	circular	2019-06-19	Thailand: Nakhon Pathom		13.8199	100.062		Swine		IncFIB(K)_1, JN233704, |IncFII(K)_1, CP000648,	IncF RST(K1:A-:B-):FIA(-);FIB(-);FIC(-);FII(-);FIIK(1);FIIS(-);FIIY(-)	194739	52.7034	Klebsiella pneumoniae subsp. pneumoniae	Klebsiella pneumoniae (573)	Klebsiella (570)	Enterobacteriaceae (543)	Enterobacterales (91347)	Gammaproteobacteria (1236)	Proteobacteria (1224)	Bacteria (2)	5.83921	7.91537
NZ_CP019049.1	0.0642645	0	149	202	circular	2017-06-05	China: Shanghai		31.12	121.27	sputum	Homo sapiens		repB_KLEB_VIR, AP006726, |IncHI1B(pNDM-MAR)_1, JN420336,	IncHI1 MLST(-):HCM1_043(-);HCM1_064(-);HCM1_099(-);HCM1_116(-);HCM1_178ac(-);HCM1_259(-);(-)	228613	50.0496	Klebsiella pneumoniae subsp. pneumoniae	Klebsiella pneumoniae (573)	Klebsiella (570)	Enterobacteriaceae (543)	Enterobacterales (91347)	Gammaproteobacteria (1236)	Proteobacteria (1224)	Bacteria (2)	15.3107	0.986531
CP052469.1	0.0645437	0	148	203	circular	2020-05-04	South Korea: Gangwon		37.82	128.16	blood	Homo sapiens		IncFIB(K)_1, JN233704, |IncFII(K)_1, CP000648,	IncF RST(K1:A-:B-):FIA(-);FIB(-);FIC(-);FII(-);FIIK(1);FIIS(-);FIIY(-)	207182	52.3989	Klebsiella pneumoniae	Klebsiella pneumoniae (573)	Klebsiella (570)	Enterobacteriaceae (543)	Enterobacterales (91347)	Gammaproteobacteria (1236)	Proteobacteria (1224)	Bacteria (2)	5.94571	7.87889
CP052178.1	0.0645437	0	148	204	circular	2020-05-04	South Korea: Busan		35.18	129.08	blood	Homo sapiens		repB_KLEB_VIR, AP006726, |IncHI1B(pNDM-MAR)_1, JN420336,	IncHI1 MLST(-):HCM1_043(-);HCM1_064(-);HCM1_099(-);HCM1_116(-);HCM1_178ac(-);HCM1_259(-);(-)	231763	50.1512	Klebsiella pneumoniae	Klebsiella pneumoniae (573)	Klebsiella (570)	Enterobacteriaceae (543)	Enterobacterales (91347)	Gammaproteobacteria (1236)	Proteobacteria (1224)	Bacteria (2)	15.2658	1.02757
LR890543.1	0.064825	0	147	205	circular	2020-10-30										268509	47.5962	Klebsiella pneumoniae	Klebsiella pneumoniae (573)	Klebsiella (570)	Enterobacteriaceae (543)	Enterobacterales (91347)	Gammaproteobacteria (1236)	Proteobacteria (1224)	Bacteria (2)	15.6187	-0.110661
NZ_CP031811.1	0.0651085	0	146	206	circular	2018-09-02								IncFIB(K)_1, JN233704, |IncFII(K)_1, CP000648,	IncF RST(K1:A-:B-):FIA(-);FIB(-);FIC(-);FII(-);FIIK(1);FIIS(-);FIIY(-)	169460	52.5888	Klebsiella pneumoniae	Klebsiella pneumoniae (573)	Klebsiella (570)	Enterobacteriaceae (543)	Enterobacterales (91347)	Gammaproteobacteria (1236)	Proteobacteria (1224)	Bacteria (2)	5.93684	7.87014
NZ_CP033961.1	0.0651085	0	146	207	circular	2019-06-29	China:Zhejiang	China,Zhejiang	29	120	stool	Homo sapiens		repB_KLEB_VIR, AP006726, |IncHI1B(pNDM-MAR)_1, JN420336,	IncHI1 MLST(-):HCM1_043(-);HCM1_064(-);HCM1_099(-);HCM1_116(-);HCM1_178ac(-);HCM1_259(-);(-)	145683	49.9969	Klebsiella pneumoniae	Klebsiella pneumoniae (573)	Klebsiella (570)	Enterobacteriaceae (543)	Enterobacterales (91347)	Gammaproteobacteria (1236)	Proteobacteria (1224)	Bacteria (2)	4.86154	8.16026
MN543581.1	0.0651085	0	146	208	circular	2020-06-12								IncFIB(K)(pCAV1099-114)_1, CP011596,	IncF RST(F-:A-:B-):FIA(-);FIB(-);FIC(-);FII(-);FIIK(-);FIIS(-);FIIY(-)	235461	49.7985	Klebsiella pneumoniae	Klebsiella pneumoniae (573)	Klebsiella (570)	Enterobacteriaceae (543)	Enterobacterales (91347)	Gammaproteobacteria (1236)	Proteobacteria (1224)	Bacteria (2)	15.2555	0.900497
NZ_CP056522.1	0.0653942	0	145	209	circular	2020-08-03	United Kingdom	United Kingdom	54.7024	-3.27658	Wastewater influent sample		culture	IncFIB(K)_1, JN233704,	IncF RST(F-:A-:B-):FIA(-);FIB(-);FIC(-);FII(-);FIIK(-);FIIS(-);FIIY(-)	113797	51.9653	Klebsiella pneumoniae	Klebsiella pneumoniae (573)	Klebsiella (570)	Enterobacteriaceae (543)	Enterobacterales (91347)	Gammaproteobacteria (1236)	Proteobacteria (1224)	Bacteria (2)	6.30914	7.75716
NZ_CP056223.1	0.0653942	0	145	210	circular	2020-08-03	United Kingdom	United Kingdom	54.7024	-3.27658	Wastewater influent sample		culture	IncFIB(K)(pCAV1099-114)_1, CP011596,	IncF RST(F-:A-:B-):FIA(-);FIB(-);FIC(-);FII(-);FIIK(-);FIIS(-);FIIY(-)	176327	50.775	Klebsiella pneumoniae	Klebsiella pneumoniae (573)	Klebsiella (570)	Enterobacteriaceae (543)	Enterobacterales (91347)	Gammaproteobacteria (1236)	Proteobacteria (1224)	Bacteria (2)	5.20861	7.89249
AP022528.1	0.0653942	0	145	211	circular	2020-10-09	Japan:Tokyo	Japan,Tokyo	34.6969	139.405		Homo sapiens		IncFIB(K)_1, JN233704,	IncF RST(F-:A-:B-):FIA(-);FIB(-);FIC(-);FII(-);FIIK(-);FIIS(-);FIIY(-)	142386	51.7818	Klebsiella pneumoniae	Klebsiella pneumoniae (573)	Klebsiella (570)	Enterobacteriaceae (543)	Enterobacterales (91347)	Gammaproteobacteria (1236)	Proteobacteria (1224)	Bacteria (2)	5.58364	7.62171
LR890246.1	0.0653942	0	145	212	circular	2020-10-30								IncFIB(K)_1, JN233704, |IncFII(K)_1, CP000648,	IncF RST(K1:A-:B-):FIA(-);FIB(-);FIC(-);FII(-);FIIK(1);FIIS(-);FIIY(-)	238703	53.0944	Klebsiella pneumoniae	Klebsiella pneumoniae (573)	Klebsiella (570)	Enterobacteriaceae (543)	Enterobacterales (91347)	Gammaproteobacteria (1236)	Proteobacteria (1224)	Bacteria (2)	5.97322	7.93495
NZ_CP031790.1	0.0653942	0	145	213	circular	2018-09-02								repB_KLEB_VIR, AP006726,		213061	50.2908	Klebsiella pneumoniae	Klebsiella pneumoniae (573)	Klebsiella (570)	Enterobacteriaceae (543)	Enterobacterales (91347)	Gammaproteobacteria (1236)	Proteobacteria (1224)	Bacteria (2)	4.93203	7.57721
NZ_CP054265.1	0.0656822	0	144	214	circular	2020-06-11	USA	USA	39.7837	-100.446	blood	Homo sapiens		IncFII(K)_1, CP000648, |IncFIB(K)_1, JN233704,	IncF RST(K1:A-:B-):FIA(-);FIB(-);FIC(-);FII(-);FIIK(1);FIIS(-);FIIY(-)	168717	52.6491	Klebsiella pneumoniae	Klebsiella pneumoniae (573)	Klebsiella (570)	Enterobacteriaceae (543)	Enterobacterales (91347)	Gammaproteobacteria (1236)	Proteobacteria (1224)	Bacteria (2)	5.90843	7.87133
NZ_CP034681.1	0.0656822	0	144	215	circular	2019-01-06	China: Sichuan	China,Sichuan	30.5	102.5	feces	swine	single cell	IncFIB(pNDM-Mar)_1, JN420336, |IncHI1B(pNDM-MAR)_1, JN420336,	IncF RST(F-:A-:B-):FIA(-);FIB(-);FIC(-);FII(-);FIIK(-);FIIS(-);FIIY(-)|IncHI1 MLST(-):HCM1_043(-);HCM1_064(-);HCM1_099(-);HCM1_116(-);HCM1_178ac(-);HCM1_259(-);(-)	296653	46.489	Klebsiella quasipneumoniae	Klebsiella quasipneumoniae (1463165)	Klebsiella (570)	Enterobacteriaceae (543)	Enterobacterales (91347)	Gammaproteobacteria (1236)	Proteobacteria (1224)	Bacteria (2)	15.6576	-0.0927681
NZ_MH056209.1	0.0659724	0	143	216	circular	2020-06-03								IncFIB(K)_1, JN233704,	IncF RST(F-:A-:B-):FIA(-);FIB(-);FIC(-);FII(-);FIIK(-);FIIS(-);FIIY(-)	108256	51.8096	Enterobacter cloacae	Enterobacter cloacae (550)	Enterobacter (547)	Enterobacteriaceae (543)	Enterobacterales (91347)	Gammaproteobacteria (1236)	Proteobacteria (1224)	Bacteria (2)	17.8112	16.0812
NZ_CP056308.1	0.0659724	0	143	217	circular	2020-08-03	United Kingdom	United Kingdom	54.7024	-3.27658	Freshwater sample from downstream of wastewater treatment plant		culture	IncFIB(K)_1, JN233704, |IncFII(K)_1, CP000648,	IncF RST(K8:A-:B-):FIA(-);FIB(-);FIC(-);FII(-);FIIK(8);FIIS(-);FIIY(-)	232875	52.5608	Klebsiella pneumoniae	Klebsiella pneumoniae (573)	Klebsiella (570)	Enterobacteriaceae (543)	Enterobacterales (91347)	Gammaproteobacteria (1236)	Proteobacteria (1224)	Bacteria (2)	5.76028	7.52089
NZ_MT644086.1	0.0659724	0	143	218	circular	2020-09-30								IncR_1, DQ449578, |IncFII(pHN7A8)_1, JN232517, |repB_KLEB_VIR, AP006726, |IncHI1B(pNDM-MAR)_1, JN420336,	IncF RST(F33:A-:B-):FIA(-);FIB(-);FIC(5?);FII(33);FIIK(-);FIIS(-);FIIY(-)|IncHI1 MLST(-):HCM1_043(-);HCM1_064(-);HCM1_099(-);HCM1_116(-);HCM1_178ac(-);HCM1_259(-);(-)	293391	51.4747	Klebsiella pneumoniae	Klebsiella pneumoniae (573)	Klebsiella (570)	Enterobacteriaceae (543)	Enterobacterales (91347)	Gammaproteobacteria (1236)	Proteobacteria (1224)	Bacteria (2)	15.3048	0.990926
NZ_CP057035.1	0.0662649	0	142	219	circular	2020-08-03	United Kingdom	United Kingdom	54.7024	-3.27658	Pooled cattle faecal samples collected from floor of farm		culture	IncFIB(K)(pCAV1099-114)_1, CP011596, |IncHI1B(pNDM-MAR)_1, JN420336,	IncF RST(F-:A-:B-):FIA(-);FIB(-);FIC(-);FII(-);FIIK(-);FIIS(-);FIIY(-)|IncHI1 MLST(-):HCM1_043(-);HCM1_064(-);HCM1_099(-);HCM1_116(-);HCM1_178ac(-);HCM1_259(-);(-)	227199	50.7687	Klebsiella pneumoniae	Klebsiella pneumoniae (573)	Klebsiella (570)	Enterobacteriaceae (543)	Enterobacterales (91347)	Gammaproteobacteria (1236)	Proteobacteria (1224)	Bacteria (2)	5.16881	8.00155
NZ_CP031583.1	0.0662649	0	142	220	circular	2019-02-08	Missing				Rectal swab	Homo sapiens		IncFII(K)_1, CP000648, |IncFIB(K)_1, JN233704,	IncF RST(K1:A-:B-):FIA(-);FIB(-);FIC(-);FII(-);FIIK(1);FIIS(-);FIIY(-)	198719	52.6663	Klebsiella pneumoniae	Klebsiella pneumoniae (573)	Klebsiella (570)	Enterobacteriaceae (543)	Enterobacterales (91347)	Gammaproteobacteria (1236)	Proteobacteria (1224)	Bacteria (2)	5.96745	7.87991
LR890741.1	0.0665597	0	141	221	circular	2020-10-30								IncFIB(K)_1, JN233704, |IncFII(K)_1, CP000648,	IncF RST(K15:A-:B-):FIA(-);FIB(-);FIC(-);FII(-);FIIK(15);FIIS(-);FIIY(-)	193723	53.4191	Klebsiella pneumoniae	Klebsiella pneumoniae (573)	Klebsiella (570)	Enterobacteriaceae (543)	Enterobacterales (91347)	Gammaproteobacteria (1236)	Proteobacteria (1224)	Bacteria (2)	5.63327	7.32071
NZ_MH643791.1	0.0665597	0	141	222	circular	2020-11-04								IncFII(pCRY)_1, NC_005814, |repB_KLEB_VIR, AP006726, |IncHI1B(pNDM-MAR)_1, JN420336,	IncF RST(F-:A-:B-):FIA(-);FIB(-);FIC(-);FII(-);FIIK(-);FIIS(-);FIIY(-)|IncHI1 MLST(-):HCM1_043(-);HCM1_064(-);HCM1_099(-);HCM1_116(-);HCM1_178ac(-);HCM1_259(-);(-)	302845	51.042	Klebsiella pneumoniae subsp. pneumoniae	Klebsiella pneumoniae (573)	Klebsiella (570)	Enterobacteriaceae (543)	Enterobacterales (91347)	Gammaproteobacteria (1236)	Proteobacteria (1224)	Bacteria (2)	15.0982	1.17055
NZ_MH255828.1	0.0668569	0	140	223	circular	2020-06-03								repB_KLEB_VIR, AP006726, |IncHI1B(pNDM-MAR)_1, JN420336,	IncHI1 MLST(-):HCM1_043(-);HCM1_064(-);HCM1_099(-);HCM1_116(-);HCM1_178ac(-);HCM1_259(-);(-)	188437	49.8936	Klebsiella pneumoniae subsp. pneumoniae	Klebsiella pneumoniae (573)	Klebsiella (570)	Enterobacteriaceae (543)	Enterobacterales (91347)	Gammaproteobacteria (1236)	Proteobacteria (1224)	Bacteria (2)	4.82713	8.69504
NZ_MN200130.1	0.0668569	0	140	224	circular	2020-08-04								FII(pBK30683)_1, KF954760, |repB_KLEB_VIR, AP006726, |IncHI1B(pNDM-MAR)_1, JN420336,	IncHI1 MLST(-):HCM1_043(-);HCM1_064(-);HCM1_099(-);HCM1_116(-);HCM1_178ac(-);HCM1_259(-);(-)	330557	51.9066	Escherichia coli	Escherichia coli (562)	Escherichia (561)	Enterobacteriaceae (543)	Enterobacterales (91347)	Gammaproteobacteria (1236)	Proteobacteria (1224)	Bacteria (2)	15.3067	0.974502
NZ_CP014121.1	0.0668569	0	140	225	circular	2018-03-04	USA:DC	USA,DC	38.8937	-76.9879	urine	Homo sapiens		IncFIB(K)_1, JN233704, |IncFII(K)_1, CP000648,	IncF RST(K1:A-:B-):FIA(-);FIB(-);FIC(-);FII(-);FIIK(1);FIIS(-);FIIY(-)	200203	52.5277	Klebsiella pneumoniae	Klebsiella pneumoniae (573)	Klebsiella (570)	Enterobacteriaceae (543)	Enterobacterales (91347)	Gammaproteobacteria (1236)	Proteobacteria (1224)	Bacteria (2)	5.97268	7.91331
NZ_CP056192.1	0.0671564	0	139	226	circular	2020-08-03	United Kingdom	United Kingdom	54.7024	-3.27658	Freshwater sample from downstream of wastewater treatment plant		culture	IncFIB(K)_1, JN233704, |IncFII(K)_1, CP000648,	IncF RST(K5:A-:B-):FIA(-);FIB(-);FIC(-);FII(-);FIIK(5);FIIS(-);FIIY(-)	246880	52.4652	Klebsiella pneumoniae	Klebsiella pneumoniae (573)	Klebsiella (570)	Enterobacteriaceae (543)	Enterobacterales (91347)	Gammaproteobacteria (1236)	Proteobacteria (1224)	Bacteria (2)	5.66739	7.29864
NZ_CP056302.1	0.0671564	0	139	227	circular	2020-08-03	United Kingdom	United Kingdom	54.7024	-3.27658	Wastewater influent sample		culture	IncFIB(K)_1, JN233704, |IncFII(pKP91)_1, CP000966,	IncF RST(K9:A-:B-):FIA(-);FIB(-);FIC(-);FII(-);FIIK(9);FIIS(-);FIIY(-)	267374	53.6473	Klebsiella pneumoniae	Klebsiella pneumoniae (573)	Klebsiella (570)	Enterobacteriaceae (543)	Enterobacterales (91347)	Gammaproteobacteria (1236)	Proteobacteria (1224)	Bacteria (2)	5.68787	8.51235
NZ_CP049720.1	0.0671564	0	139	228	circular	2020-07-17	Switzerland: Bern		46.948	7.4474	Pus	Canis lupus familiaris		IncFIB(K)_1, JN233704, |IncFII(K)_1, CP000648,	IncF RST(K1:A-:B-):FIA(-);FIB(-);FIC(-);FII(-);FIIK(1);FIIS(-);FIIY(-)	204699	52.371	Klebsiella pneumoniae	Klebsiella pneumoniae (573)	Klebsiella (570)	Enterobacteriaceae (543)	Enterobacterales (91347)	Gammaproteobacteria (1236)	Proteobacteria (1224)	Bacteria (2)	6.02479	7.96999
NZ_CP021958.1	0.0671564	0	139	229	linear	2017-06-22	missing				missing	missing		IncHI1B(pNDM-MAR)_1, JN420336,	IncHI1 MLST(-):HCM1_043(-);HCM1_064(-);HCM1_099(-);HCM1_116(-);HCM1_178ac(-);HCM1_259(-);(-)	128920	51.1201	Klebsiella pneumoniae	Klebsiella pneumoniae (573)	Klebsiella (570)	Enterobacteriaceae (543)	Enterobacterales (91347)	Gammaproteobacteria (1236)	Proteobacteria (1224)	Bacteria (2)	5.15911	7.89342
NZ_CP027054.1	0.0671564	0	139	230	not-set	2018-12-06	Greece: Athens		38.03	23.79	urine	Homo sapiens		IncFIB(K)_1, JN233704, |IncFII(K)_1, CP000648,	IncF RST(K2:A-:B-):FIA(-);FIB(-);FIC(-);FII(-);FIIK(2);FIIS(-);FIIY(-)	197872	52.7462	Klebsiella pneumoniae	Klebsiella pneumoniae (573)	Klebsiella (570)	Enterobacteriaceae (543)	Enterobacterales (91347)	Gammaproteobacteria (1236)	Proteobacteria (1224)	Bacteria (2)	6.01956	7.98989
NZ_CP032173.1	0.0674584	0	138	231	circular	2018-09-19	missing				missing	missing		IncFIB(K)_1, JN233704,	IncF RST(F-:A-:B-):FIA(-);FIB(-);FIC(-);FII(-);FIIK(-);FIIS(-);FIIY(-)	153522	51.788	Klebsiella pneumoniae	Klebsiella pneumoniae (573)	Klebsiella (570)	Enterobacteriaceae (543)	Enterobacterales (91347)	Gammaproteobacteria (1236)	Proteobacteria (1224)	Bacteria (2)	5.59696	7.60676
NZ_CP015386.1	0.0674584	0	138	232	circular	2017-01-19	USA: New York	USA,New York	40.7309	-73.9872		Homo sapiens		IncFIB(K)_1, JN233704, |IncFII(K)_1, CP000648,	IncF RST(K1:A-:B-):FIA(-);FIB(-);FIC(-);FII(-);FIIK(1);FIIS(-);FIIY(-)	199497	52.9336	Klebsiella pneumoniae	Klebsiella pneumoniae (573)	Klebsiella (570)	Enterobacteriaceae (543)	Enterobacterales (91347)	Gammaproteobacteria (1236)	Proteobacteria (1224)	Bacteria (2)	5.95575	7.93605
NZ_CP015823.1	0.0677629	0	137	233	circular	2016-08-17	Switzerland: Basel		47.5596	7.5886	blood	Homo sapiens		IncFII(K)_1, CP000648, |IncFIB(K)_1, JN233704,	IncF RST(K1:A-:B-):FIA(-);FIB(-);FIC(-);FII(-);FIIK(1);FIIS(-);FIIY(-)	205221	52.8898	Klebsiella pneumoniae	Klebsiella pneumoniae (573)	Klebsiella (570)	Enterobacteriaceae (543)	Enterobacterales (91347)	Gammaproteobacteria (1236)	Proteobacteria (1224)	Bacteria (2)	6.049	7.87584
NZ_CP040595.1	0.0677629	0	137	234	circular	2019-05-31	United Kingdom		51.55	-0.04	throat	Homo sapiens		repB_KLEB_VIR, AP006726, |IncHI1B(pNDM-MAR)_1, JN420336,	IncHI1 MLST(-):HCM1_043(-);HCM1_064(-);HCM1_099(-);HCM1_116(-);HCM1_178ac(-);HCM1_259(-);(-)	277162	51.1369	Klebsiella pneumoniae subsp. pneumoniae	Klebsiella pneumoniae (573)	Klebsiella (570)	Enterobacteriaceae (543)	Enterobacterales (91347)	Gammaproteobacteria (1236)	Proteobacteria (1224)	Bacteria (2)	15.1786	1.09017
NZ_LR130549.1	0.0677629	0	137	235	linear	2019-01-10								IncFIB(K)_1, JN233704, |IncFII(K)_1, CP000648,	IncF RST(K2:A-:B-):FIA(-);FIB(-);FIC(-);FII(-);FIIK(2);FIIS(-);FIIY(-)	207198	52.9325	Klebsiella pneumoniae	Klebsiella pneumoniae (573)	Klebsiella (570)	Enterobacteriaceae (543)	Enterobacterales (91347)	Gammaproteobacteria (1236)	Proteobacteria (1224)	Bacteria (2)	5.98406	7.9654
NZ_CP029101.1	0.0677629	0	137	236	circular	2018-05-02	missing				missing	missing		IncFIB(K)_1, JN233704, |IncFII(K)_1, CP000648,	IncF RST(K1:A-:B-):FIA(-);FIB(-);FIC(-);FII(-);FIIK(1);FIIS(-);FIIY(-)	208035	52.9247	Klebsiella pneumoniae	Klebsiella pneumoniae (573)	Klebsiella (570)	Enterobacteriaceae (543)	Enterobacterales (91347)	Gammaproteobacteria (1236)	Proteobacteria (1224)	Bacteria (2)	6.00182	7.8971
NZ_CP058326.1	0.0677629	0	137	237	circular	2020-11-17	Italy: Lecco		45.8522	9.415	urine	Homo sapiens		IncFIB(K)_1, JN233704, |IncFII(K)_1, CP000648,	IncF RST(K2:A-:B-):FIA(-);FIB(-);FIC(-);FII(-);FIIK(2);FIIS(-);FIIY(-)	205144	52.9131	Klebsiella pneumoniae subsp. pneumoniae	Klebsiella pneumoniae (573)	Klebsiella (570)	Enterobacteriaceae (543)	Enterobacterales (91347)	Gammaproteobacteria (1236)	Proteobacteria (1224)	Bacteria (2)	6.02341	7.96863
CP056419.1	0.0677629	0	137	238	circular	2020-07-27	United Kingdom	United Kingdom	54.7024	-3.27658	Wastewater effluent sample		culture	IncFIA(HI1)_1, AF250878, |IncFII(pKP91)_1, CP000966,	IncF RST(K28:A-:B-):FIA(21?);FIB(-);FIC(-);FII(-);FIIK(28);FIIS(-);FIIY(10?)	157768	53.2903	Klebsiella oxytoca	Klebsiella oxytoca (571)	Klebsiella (570)	Enterobacteriaceae (543)	Enterobacterales (91347)	Gammaproteobacteria (1236)	Proteobacteria (1224)	Bacteria (2)	5.63095	7.62996
CP052477.1	0.0680698	0	136	239	circular	2020-05-04	South Korea: Gangwon		37.82	128.16	blood	Homo sapiens		IncFIB(K)_1, JN233704, |IncFII(K)_1, CP000648,	IncF RST(K1:A-:B-):FIA(-);FIB(-);FIC(-);FII(-);FIIK(1);FIIS(-);FIIY(-)	194006	52.4324	Klebsiella pneumoniae	Klebsiella pneumoniae (573)	Klebsiella (570)	Enterobacteriaceae (543)	Enterobacterales (91347)	Gammaproteobacteria (1236)	Proteobacteria (1224)	Bacteria (2)	5.92552	7.89109
NZ_MN310379.1	0.0680698	0	136	240	circular	2020-08-04								IncFIB(K)_1, JN233704,	IncF RST(F-:A-:B-):FIA(-);FIB(-);FIC(-);FII(-);FIIK(-);FIIS(-);FIIY(-)	189898	52.6483	Klebsiella quasipneumoniae	Klebsiella quasipneumoniae (1463165)	Klebsiella (570)	Enterobacteriaceae (543)	Enterobacterales (91347)	Gammaproteobacteria (1236)	Proteobacteria (1224)	Bacteria (2)	5.69358	7.73577
NZ_CP025577.1	0.0680698	0	136	241	circular	2019-01-12	Sweden: Stockholm	Sweden,Stockholm	59.3251	18.0711		Homo sapiens	Bacterial isolate	IncFIB(K)_1, JN233704, |IncFII(pKP91)_1, CP000966,	IncF RST(K9:A-:B-):FIA(-);FIB(-);FIC(-);FII(-);FIIK(9);FIIS(-);FIIY(-)	215872	51.6223	Klebsiella pneumoniae	Klebsiella pneumoniae (573)	Klebsiella (570)	Enterobacteriaceae (543)	Enterobacterales (91347)	Gammaproteobacteria (1236)	Proteobacteria (1224)	Bacteria (2)	5.67221	8.55688
NZ_MT090959.1	0.0680698	0	136	242	circular	2020-08-04								repB_KLEB_VIR, AP006726, |IncHI1B(pNDM-MAR)_1, JN420336,	IncHI1 MLST(-):HCM1_043(-);HCM1_064(-);HCM1_099(-);HCM1_116(-);HCM1_178ac(-);HCM1_259(-);(-)	186564	52.352	Klebsiella pneumoniae	Klebsiella pneumoniae (573)	Klebsiella (570)	Enterobacteriaceae (543)	Enterobacterales (91347)	Gammaproteobacteria (1236)	Proteobacteria (1224)	Bacteria (2)	4.80451	8.20019
NZ_CP049717.1	0.0680698	0	136	243	circular	2020-07-17	Switzerland: Bern		46.948	7.4474	urine	Canis lupus familiaris		IncFIB(K)_1, JN233704, |IncFII(K)_1, CP000648,	IncF RST(K1:A-:B-):FIA(-);FIB(-);FIC(-);FII(-);FIIK(1);FIIS(-);FIIY(-)	190737	52.5724	Klebsiella pneumoniae	Klebsiella pneumoniae (573)	Klebsiella (570)	Enterobacteriaceae (543)	Enterobacterales (91347)	Gammaproteobacteria (1236)	Proteobacteria (1224)	Bacteria (2)	5.9638	7.91839
LR134207.1	0.0680698	0	136	244	circular	2018-12-19								IncFIB(K)(pCAV1099-114)_1, CP011596,	IncF RST(F-:A-:B-):FIA(-);FIB(-);FIC(-);FII(-);FIIK(-);FIIS(-);FIIY(-)	223253	49.7458	Klebsiella pneumoniae	Klebsiella pneumoniae (573)	Klebsiella (570)	Enterobacteriaceae (543)	Enterobacterales (91347)	Gammaproteobacteria (1236)	Proteobacteria (1224)	Bacteria (2)	5.20117	7.95173
NZ_CP029136.1	0.0680698	0	136	245	circular	2018-05-02	missing				missing	missing		IncFII(K)_1, CP000648, |IncFIB(K)_1, JN233704,	IncF RST(K1:A-:B-):FIA(-);FIB(-);FIC(-);FII(-);FIIK(1);FIIS(-);FIIY(-)	190416	52.4594	Klebsiella pneumoniae	Klebsiella pneumoniae (573)	Klebsiella (570)	Enterobacteriaceae (543)	Enterobacterales (91347)	Gammaproteobacteria (1236)	Proteobacteria (1224)	Bacteria (2)	5.91786	7.89123
NZ_CP022692.2	0.0680698	0	136	246	circular	2017-08-16	Australia: Victoria		-37.81	144.96	Patient urine	Homo sapiens		IncFIB(K)_1, JN233704, |IncFII(K)_1, CP000648,	IncF RST(K2:A-:B-):FIA(-);FIB(-);FIC(-);FII(-);FIIK(2);FIIS(-);FIIY(-)	207351	52.9368	Klebsiella pneumoniae subsp. pneumoniae	Klebsiella pneumoniae (573)	Klebsiella (570)	Enterobacteriaceae (543)	Enterobacterales (91347)	Gammaproteobacteria (1236)	Proteobacteria (1224)	Bacteria (2)	5.99593	7.93408
NZ_CP021752.1	0.0680698	0	136	247	circular	2017-06-15	missing				missing	missing		IncFII(K)_1, CP000648, |IncFIB(K)_1, JN233704,	IncF RST(K1:A-:B-):FIA(-);FIB(-);FIC(-);FII(-);FIIK(1);FIIS(-);FIIY(-)	209550	52.8471	Klebsiella pneumoniae	Klebsiella pneumoniae (573)	Klebsiella (570)	Enterobacteriaceae (543)	Enterobacterales (91347)	Gammaproteobacteria (1236)	Proteobacteria (1224)	Bacteria (2)	5.97951	7.92178
NZ_CP027161.1	0.0683793	0	135	248	circular	2018-03-12	missing				missing	missing		IncFIB(K)_1, JN233704, |IncFII(K)_1, CP000648,	IncF RST(K1:A-:B-):FIA(-);FIB(-);FIC(-);FII(-);FIIK(1);FIIS(-);FIIY(-)	207543	52.8994	Klebsiella pneumoniae	Klebsiella pneumoniae (573)	Klebsiella (570)	Enterobacteriaceae (543)	Enterobacterales (91347)	Gammaproteobacteria (1236)	Proteobacteria (1224)	Bacteria (2)	6.02612	7.9415
NZ_CP030343.1	0.0683793	0	135	249	circular	2018-07-12	missing				missing	missing		IncFIB(K)_1, JN233704, |IncFII(K)_1, CP000648,	IncF RST(K1:A-:B-):FIA(-);FIB(-);FIC(-);FII(-);FIIK(1);FIIS(-);FIIY(-)	207546	52.9039	Klebsiella pneumoniae	Klebsiella pneumoniae (573)	Klebsiella (570)	Enterobacteriaceae (543)	Enterobacterales (91347)	Gammaproteobacteria (1236)	Proteobacteria (1224)	Bacteria (2)	5.98862	7.92402
NZ_CP018355.1	0.0683793	0	135	250	circular	2016-12-19	USA:Virginia		38.14	-78.45	Perirectal	Homo sapiens		IncFIB(K)_1, JN233704, |IncFII(K)_1, CP000648,	IncF RST(K1:A-:B-):FIA(-);FIB(-);FIC(-);FII(-);FIIK(1);FIIS(-);FIIY(-)	207543	52.9004	Klebsiella pneumoniae	Klebsiella pneumoniae (573)	Klebsiella (570)	Enterobacteriaceae (543)	Enterobacterales (91347)	Gammaproteobacteria (1236)	Proteobacteria (1224)	Bacteria (2)	6.03278	7.88212
NZ_CP018886.1	0.0683793	0	135	251	circular	2018-03-04	Brazil: Rio de Janeiro		-22.9068	-43.1729	urine	Homo sapiens		IncFII(K)_1, CP000648, |IncFIB(K)_1, JN233704,	IncF RST(K1:A-:B-):FIA(-);FIB(-);FIC(-);FII(-);FIIK(1);FIIS(-);FIIY(-)	217456	52.4984	Klebsiella pneumoniae subsp. pneumoniae	Klebsiella pneumoniae (573)	Klebsiella (570)	Enterobacteriaceae (543)	Enterobacterales (91347)	Gammaproteobacteria (1236)	Proteobacteria (1224)	Bacteria (2)	5.91799	7.97169
NZ_CP020838.1	0.0683793	0	135	252	circular	2017-05-25	USA: New York, New York City		40	-74.5	unknown	Homo sapiens		IncFII(K)_1, CP000648, |IncFIB(K)_1, JN233704,	IncF RST(K1:A-:B-):FIA(-);FIB(-);FIC(-);FII(-);FIIK(1);FIIS(-);FIIY(-)	232540	53.6248	Klebsiella pneumoniae	Klebsiella pneumoniae (573)	Klebsiella (570)	Enterobacteriaceae (543)	Enterobacterales (91347)	Gammaproteobacteria (1236)	Proteobacteria (1224)	Bacteria (2)	5.95744	7.88811
NZ_CP010393.1	0.0683793	0	135	253	circular	2015-01-21	USA	USA	39.7837	-100.446	bodily fluid	Homo sapiens		IncFIB(K)_1, JN233704, |IncFII(K)_1, CP000648,	IncF RST(K1:A-:B-):FIA(-);FIB(-);FIC(-);FII(-);FIIK(1);FIIS(-);FIIY(-)	207543	52.9004	Klebsiella pneumoniae	Klebsiella pneumoniae (573)	Klebsiella (570)	Enterobacteriaceae (543)	Enterobacterales (91347)	Gammaproteobacteria (1236)	Proteobacteria (1224)	Bacteria (2)	5.99628	7.91214
MN543571.1	0.0683793	0	135	254	circular	2020-06-12								IncFIB(K)(pCAV1099-114)_1, CP011596, |IncHI1B(pNDM-MAR)_1, JN420336,	IncF RST(F-:A-:B-):FIA(-);FIB(-);FIC(-);FII(-);FIIK(-);FIIS(-);FIIY(-)|IncHI1 MLST(-):HCM1_043(-);HCM1_064(-);HCM1_099(-);HCM1_116(-);HCM1_178ac(-);HCM1_259(-);(-)	175909	51.0525	Klebsiella pneumoniae	Klebsiella pneumoniae (573)	Klebsiella (570)	Enterobacteriaceae (543)	Enterobacterales (91347)	Gammaproteobacteria (1236)	Proteobacteria (1224)	Bacteria (2)	5.14119	8.04516
AP022554.1	0.0686914	0	134	255	circular	2020-10-09	Japan:Tokyo	Japan,Tokyo	34.6969	139.405		Homo sapiens		IncFIB(K)_1, JN233704,	IncF RST(F-:A-:B-):FIA(-);FIB(-);FIC(-);FII(-);FIIK(-);FIIS(-);FIIY(-)	190035	51.7221	Klebsiella pneumoniae	Klebsiella pneumoniae (573)	Klebsiella (570)	Enterobacteriaceae (543)	Enterobacterales (91347)	Gammaproteobacteria (1236)	Proteobacteria (1224)	Bacteria (2)	5.74647	8.06785
NZ_CP015393.1	0.0686914	0	134	256	circular	2017-02-18	USA: New York	USA,New York	40.7309	-73.9872		Homo sapiens		IncFII(K)_1, CP000648, |IncFIB(K)_1, JN233704,	IncF RST(K2:A-:B-):FIA(-);FIB(-);FIC(-);FII(-);FIIK(2);FIIS(-);FIIY(-)	202696	52.5338	Klebsiella pneumoniae	Klebsiella pneumoniae (573)	Klebsiella (570)	Enterobacteriaceae (543)	Enterobacterales (91347)	Gammaproteobacteria (1236)	Proteobacteria (1224)	Bacteria (2)	6.02797	7.93115
NZ_CP027152.1	0.0686914	0	134	257	circular	2018-03-12	missing				missing	missing		IncFIB(K)_1, JN233704, |IncFII(K)_1, CP000648,	IncF RST(K1:A-:B-):FIA(-);FIB(-);FIC(-);FII(-);FIIK(1);FIIS(-);FIIY(-)	208849	52.9028	Klebsiella pneumoniae	Klebsiella pneumoniae (573)	Klebsiella (570)	Enterobacteriaceae (543)	Enterobacterales (91347)	Gammaproteobacteria (1236)	Proteobacteria (1224)	Bacteria (2)	6.01657	7.92522
NZ_CP020072.1	0.0686914	0	134	258	circular	2017-03-23	missing				missing	missing		IncFII(K)_1, CP000648, |IncFIB(K)_1, JN233704,	IncF RST(K1:A-:B-):FIA(-);FIB(-);FIC(-);FII(-);FIIK(1);FIIS(-);FIIY(-)	209424	52.8831	Klebsiella pneumoniae	Klebsiella pneumoniae (573)	Klebsiella (570)	Enterobacteriaceae (543)	Enterobacterales (91347)	Gammaproteobacteria (1236)	Proteobacteria (1224)	Bacteria (2)	5.95821	7.96498
NZ_CP021713.1	0.0686914	0	134	259	circular	2017-06-10	missing				missing	missing		IncFII(K)_1, CP000648, |IncFIB(K)_1, JN233704,	IncF RST(K1:A-:B-):FIA(-);FIB(-);FIC(-);FII(-);FIIK(1);FIIS(-);FIIY(-)	208224	52.8796	Klebsiella pneumoniae	Klebsiella pneumoniae (573)	Klebsiella (570)	Enterobacteriaceae (543)	Enterobacterales (91347)	Gammaproteobacteria (1236)	Proteobacteria (1224)	Bacteria (2)	5.96422	7.90608
NZ_CP009777.1	0.0686914	0	134	260	circular	2015-01-21	USA	USA	39.7837	-100.446	perirectal swab		missing	IncFIB(K)_1, JN233704, |IncFII(K)_1, CP000648,	IncF RST(K1:A-:B-):FIA(-);FIB(-);FIC(-);FII(-);FIIK(1);FIIS(-);FIIY(-)	212192	52.7975	Klebsiella pneumoniae subsp. pneumoniae	Klebsiella pneumoniae (573)	Klebsiella (570)	Enterobacteriaceae (543)	Enterobacterales (91347)	Gammaproteobacteria (1236)	Proteobacteria (1224)	Bacteria (2)	6.02162	7.95989
NZ_CP021540.1	0.0686914	0	134	261	circular	2017-06-10	missing				missing	missing		IncFIB(K)_1, JN233704,	IncF RST(F-:A-:B-):FIA(-);FIB(-);FIC(-);FII(-);FIIK(-);FIIS(-);FIIY(-)	201874	53.0152	Klebsiella pneumoniae	Klebsiella pneumoniae (573)	Klebsiella (570)	Enterobacteriaceae (543)	Enterobacterales (91347)	Gammaproteobacteria (1236)	Proteobacteria (1224)	Bacteria (2)	5.9809	7.89561
NZ_CP018424.1	0.0686914	0	134	262	circular	2016-12-19	USA:Minnesota		46.7296	-94.6859	urine	Homo sapiens		IncFIB(K)_1, JN233704, |IncFII(K)_1, CP000648,	IncF RST(K1:A-:B-):FIA(-);FIB(-);FIC(-);FII(-);FIIK(1);FIIS(-);FIIY(-)	208225	52.8789	Klebsiella pneumoniae	Klebsiella pneumoniae (573)	Klebsiella (570)	Enterobacteriaceae (543)	Enterobacterales (91347)	Gammaproteobacteria (1236)	Proteobacteria (1224)	Bacteria (2)	5.9941	7.91784
LR890475.1	0.0686914	0	134	263	circular	2020-10-30								IncFIB(K)(pCAV1099-114)_1, CP011596,	IncF RST(F-:A-:B-):FIA(-);FIB(-);FIC(-);FII(-);FIIK(-);FIIS(-);FIIY(-)	269868	50.501	Klebsiella pneumoniae	Klebsiella pneumoniae (573)	Klebsiella (570)	Enterobacteriaceae (543)	Enterobacterales (91347)	Gammaproteobacteria (1236)	Proteobacteria (1224)	Bacteria (2)	4.9704	7.61591
NZ_CP021834.1	0.0686914	0	134	264	circular	2017-06-21	missing				missing	missing		IncFIB(K)_1, JN233704, |IncFII(K)_1, CP000648,	IncF RST(K1:A-:B-):FIA(-);FIB(-);FIC(-);FII(-);FIIK(1);FIIS(-);FIIY(-)	212837	52.777	Klebsiella pneumoniae	Klebsiella pneumoniae (573)	Klebsiella (570)	Enterobacteriaceae (543)	Enterobacterales (91347)	Gammaproteobacteria (1236)	Proteobacteria (1224)	Bacteria (2)	6.00708	7.88347
NZ_CP021544.1	0.0686914	0	134	265	circular	2017-06-10	missing				missing	missing		IncFII(K)_1, CP000648, |IncFIB(K)_1, JN233704,	IncF RST(K1:A-:B-):FIA(-);FIB(-);FIC(-);FII(-);FIIK(1);FIIS(-);FIIY(-)	208223	52.8794	Klebsiella pneumoniae	Klebsiella pneumoniae (573)	Klebsiella (570)	Enterobacteriaceae (543)	Enterobacterales (91347)	Gammaproteobacteria (1236)	Proteobacteria (1224)	Bacteria (2)	5.99272	7.92404
NZ_MT560072.1	0.0686914	0	134	266	circular	2020-11-17								IncFIB(K)_1, JN233704, |IncFII(K)_1, CP000648,	IncF RST(K2:A-:B-):FIA(-);FIB(-);FIC(-);FII(-);FIIK(2);FIIS(-);FIIY(-)	209317	52.8839	Klebsiella pneumoniae	Klebsiella pneumoniae (573)	Klebsiella (570)	Enterobacteriaceae (543)	Enterobacterales (91347)	Gammaproteobacteria (1236)	Proteobacteria (1224)	Bacteria (2)	5.97583	7.92884
NZ_CP018434.1	0.0686914	0	134	267	circular	2016-12-19	USA:Minnesota		46.7296	-94.6859	wound	Homo sapiens		IncFIB(K)_1, JN233704, |IncFII(K)_1, CP000648,	IncF RST(K1:A-:B-):FIA(-);FIB(-);FIC(-);FII(-);FIIK(1);FIIS(-);FIIY(-)	208225	52.8793	Klebsiella pneumoniae	Klebsiella pneumoniae (573)	Klebsiella (570)	Enterobacteriaceae (543)	Enterobacterales (91347)	Gammaproteobacteria (1236)	Proteobacteria (1224)	Bacteria (2)	5.99828	7.90299
NZ_KX029332.1	0.0686914	0	134	268	circular	2020-06-03								IncHI1B(pNDM-MAR)_1, JN420336,	IncHI1 MLST(-):HCM1_043(-);HCM1_064(-);HCM1_099(-);HCM1_116(-);HCM1_178ac(-);HCM1_259(-);(-)	209419	47.2526	Klebsiella pneumoniae	Klebsiella pneumoniae (573)	Klebsiella (570)	Enterobacteriaceae (543)	Enterobacterales (91347)	Gammaproteobacteria (1236)	Proteobacteria (1224)	Bacteria (2)	15.6788	-0.0513191
NZ_CP033774.1	0.0690061	0	133	269	circular	2018-11-26	not applicable				Bronchoalveolar lavage from right lung	Homo sapiens		IncFII(K)_1, CP000648, |IncFIB(K)_1, JN233704,	IncF RST(K1:A-:B-):FIA(-);FIB(-);FIC(-);FII(-);FIIK(1);FIIS(-);FIIY(-)	184336	52.7097	Klebsiella pneumoniae	Klebsiella pneumoniae (573)	Klebsiella (570)	Enterobacteriaceae (543)	Enterobacterales (91347)	Gammaproteobacteria (1236)	Proteobacteria (1224)	Bacteria (2)	5.96774	7.8969
NZ_CP008800.1	0.0690061	0	133	270	circular	2015-01-21	USA	USA	39.7837	-100.446	throat/groin		missing	IncFIB(K)_1, JN233704, |IncFII(K)_1, CP000648,	IncF RST(K1:A-:B-):FIA(-);FIB(-);FIC(-);FII(-);FIIK(1);FIIS(-);FIIY(-)	194877	52.47	Klebsiella pneumoniae subsp. pneumoniae KPNIH24	Klebsiella pneumoniae (573)	Klebsiella (570)	Enterobacteriaceae (543)	Enterobacterales (91347)	Gammaproteobacteria (1236)	Proteobacteria (1224)	Bacteria (2)	5.9674	7.88303
CP052168.1	0.0693234	0	132	271	circular	2020-05-04	South Korea: Busan		35.18	129.08	blood	Homo sapiens		IncFIB(K)_1, JN233704, |IncFII(K)_1, CP000648,	IncF RST(K2:A-:B-):FIA(-);FIB(-);FIC(-);FII(-);FIIK(2);FIIS(-);FIIY(-)	217779	53.3293	Klebsiella pneumoniae	Klebsiella pneumoniae (573)	Klebsiella (570)	Enterobacteriaceae (543)	Enterobacterales (91347)	Gammaproteobacteria (1236)	Proteobacteria (1224)	Bacteria (2)	6.0573	7.9894
CP027696.1	0.0693234	0	132	272	circular	2018-08-09	Not collected				Not collected	Homo sapiens		IncFIB(K)_1, JN233704, |IncFII(K)_1, CP000648,	IncF RST(K1:A-:B-):FIA(-);FIB(-);FIC(-);FII(-);FIIK(1);FIIS(-);FIIY(-)	207465	52.9786	Klebsiella pneumoniae	Klebsiella pneumoniae (573)	Klebsiella (570)	Enterobacteriaceae (543)	Enterobacterales (91347)	Gammaproteobacteria (1236)	Proteobacteria (1224)	Bacteria (2)	5.9712	7.96628
NZ_CP056025.1	0.0693234	0	132	273	circular	2020-06-28	USA	USA	39.7837	-100.446	blood	Homo sapiens		IncFIB(K)_1, JN233704, |IncFII(K)_1, CP000648,	IncF RST(K2:A-:B-):FIA(-);FIB(-);FIC(-);FII(-);FIIK(2);FIIS(-);FIIY(-)	211775	52.8986	Klebsiella pneumoniae	Klebsiella pneumoniae (573)	Klebsiella (570)	Enterobacteriaceae (543)	Enterobacterales (91347)	Gammaproteobacteria (1236)	Proteobacteria (1224)	Bacteria (2)	6.01691	7.97914
NZ_CP030066.1	0.0693234	0	132	274	circular	2019-08-06	USA: University of Iowa Hospitals and Clinics Iowa City, IA	USA,University of Iowa Hospitals and Clinics Iowa City,IA	41.6602	-91.5487	urine	Homo sapiens	missing	IncFIB(K)_1, JN233704, |IncFII(pKP91)_1, CP000966,	IncF RST(K10:A-:B-):FIA(-);FIB(-);FIC(-);FII(-);FIIK(10);FIIS(-);FIIY(-)	165742	51.3165	Klebsiella pneumoniae	Klebsiella pneumoniae (573)	Klebsiella (570)	Enterobacteriaceae (543)	Enterobacterales (91347)	Gammaproteobacteria (1236)	Proteobacteria (1224)	Bacteria (2)	5.55256	7.55277
NZ_CP020499.1	0.0693234	0	132	275	circular	2019-08-25	USA: Boston		42.3601	-71.0589	urine	Homo sapiens		IncFIB(K)_1, JN233704, |IncFII(K)_1, CP000648,	IncF RST(K1:A-:B-):FIA(-);FIB(-);FIC(-);FII(-);FIIK(1);FIIS(-);FIIY(-)	178294	52.3057	Klebsiella pneumoniae	Klebsiella pneumoniae (573)	Klebsiella (570)	Enterobacteriaceae (543)	Enterobacterales (91347)	Gammaproteobacteria (1236)	Proteobacteria (1224)	Bacteria (2)	5.91707	7.86187
NZ_CP043049.1	0.0693234	0	132	276	linear	2019-09-02	USA: Pittsburgh, Pennsylvania		40.44	-79.97	not collected	Homo sapiens		IncFII(K)_1, CP000648, |IncFIB(K)_1, JN233704,	IncF RST(K1:A-:B-):FIA(-);FIB(-);FIC(-);FII(-);FIIK(1);FIIS(-);FIIY(-)	212420	52.8152	Klebsiella pneumoniae	Klebsiella pneumoniae (573)	Klebsiella (570)	Enterobacteriaceae (543)	Enterobacterales (91347)	Gammaproteobacteria (1236)	Proteobacteria (1224)	Bacteria (2)	6.01232	7.902
NZ_CP028952.1	0.0696435	0	131	277	circular	2018-04-28	missing				missing	missing		IncFIB(K)(pCAV1099-114)_1, CP011596,	IncF RST(F-:A-:B-):FIA(-);FIB(-);FIC(-);FII(-);FIIK(-);FIIS(-);FIIY(-)	451422	49.621	Klebsiella aerogenes	Klebsiella aerogenes (548)	Klebsiella (570)	Enterobacteriaceae (543)	Enterobacterales (91347)	Gammaproteobacteria (1236)	Proteobacteria (1224)	Bacteria (2)	5.15757	8.00333
NZ_HG918041.1	0.0696435	0	131	278	circular	2014-05-12								IncFIB(pNDM-Mar)_1, JN420336, |IncHI1B(pNDM-MAR)_1, JN420336,	IncF RST(F-:A-:B-):FIA(-);FIB(-);FIC(-);FII(-);FIIK(-);FIIS(-);FIIY(-)|IncHI1 MLST(-):HCM1_043(-);HCM1_064(-);HCM1_099(-);HCM1_116(-);HCM1_178ac(-);HCM1_259(-);(-)	253984	46.7573	Klebsiella pneumoniae	Klebsiella pneumoniae (573)	Klebsiella (570)	Enterobacteriaceae (543)	Enterobacterales (91347)	Gammaproteobacteria (1236)	Proteobacteria (1224)	Bacteria (2)	15.6542	-0.0760329
NZ_CP025457.1	0.0696435	0	131	279	circular	2018-01-11	China:Shanghai	China,Shanghai	31.2253	121.489			mixed culture	IncFIB(K)_1, JN233704, |IncFII(pKP91)_1, CP000966,	IncF RST(K9:A-:B-):FIA(-);FIB(-);FIC(-);FII(-);FIIK(9);FIIS(-);FIIY(-)	223274	51.8242	Klebsiella pneumoniae	Klebsiella pneumoniae (573)	Klebsiella (570)	Enterobacteriaceae (543)	Enterobacterales (91347)	Gammaproteobacteria (1236)	Proteobacteria (1224)	Bacteria (2)	5.66552	8.53531
CP052415.1	0.0696435	0	131	280	circular	2020-05-04	South Korea: Gangwon		37.82	128.16	blood	Homo sapiens		IncFIB(K)_1, JN233704, |IncFII(K)_1, CP000648,	IncF RST(K1:A-:B-):FIA(-);FIB(-);FIC(-);FII(-);FIIK(1);FIIS(-);FIIY(-)	187491	52.5087	Klebsiella pneumoniae	Klebsiella pneumoniae (573)	Klebsiella (570)	Enterobacteriaceae (543)	Enterobacterales (91347)	Gammaproteobacteria (1236)	Proteobacteria (1224)	Bacteria (2)	5.94689	7.87683
NZ_CP063937.1	0.0696435	0	131	281	circular	2020-11-10	China:Tangshan		39.36	118.11	Human fecal samples			IncFII(pKP91)_1, CP000966, |IncFIB(K)_1, JN233704,	IncF RST(K9:A-:B-):FIA(-);FIB(-);FIC(-);FII(-);FIIK(9);FIIS(-);FIIY(-)	182144	52.2032	Klebsiella pneumoniae	Klebsiella pneumoniae (573)	Klebsiella (570)	Enterobacteriaceae (543)	Enterobacterales (91347)	Gammaproteobacteria (1236)	Proteobacteria (1224)	Bacteria (2)	5.7528	7.98824
NZ_CP055327.1	0.0699663	0	130	282	linear	2020-07-30	United Kingdom	United Kingdom	54.7024	-3.27658	Freshwater sample from upstream of wastewater treatment plant		culture	IncFIB(K)_1, JN233704, |IncFII(K)_1, CP000648, |IncFIA(HI1)_1, AF250878,	IncF RST(K5:A10:B-):FIA(10);FIB(-);FIC(-);FII(-);FIIK(5);FIIS(-);FIIY(-)	215915	51.6532	Klebsiella michiganensis	Klebsiella michiganensis (1134687)	Klebsiella (570)	Enterobacteriaceae (543)	Enterobacterales (91347)	Gammaproteobacteria (1236)	Proteobacteria (1224)	Bacteria (2)	5.9865	7.91357
CP056475.1	0.0699663	0	130	283	circular	2020-07-27	United Kingdom	United Kingdom	54.7024	-3.27658	Wastewater effluent sample		culture	IncFIB(K)_1, JN233704, |IncFII(pKP91)_1, CP000966,	IncF RST(K10:A-:B-):FIA(-);FIB(-);FIC(-);FII(-);FIIK(10);FIIS(-);FIIY(-)	157333	51.3147	Enterobacter cloacae	Enterobacter cloacae (550)	Enterobacter (547)	Enterobacteriaceae (543)	Enterobacterales (91347)	Gammaproteobacteria (1236)	Proteobacteria (1224)	Bacteria (2)	5.60957	7.61504
CP027603.1	0.0699663	0	130	284	circular	2018-03-19	missing				missing	missing		IncFIB(K)(pCAV1099-114)_1, CP011596,	IncF RST(F-:A-:B-):FIA(-);FIB(-);FIC(-);FII(-);FIIK(-);FIIS(-);FIIY(-)	457578	49.6009	Klebsiella pneumoniae	Klebsiella pneumoniae (573)	Klebsiella (570)	Enterobacteriaceae (543)	Enterobacterales (91347)	Gammaproteobacteria (1236)	Proteobacteria (1224)	Bacteria (2)	5.16856	7.99869
NZ_CP036443.1	0.0699663	0	130	285	circular	2019-03-06	USA		38.9847	-77.0947	missing	missing		IncFIB(K)_1, JN233704,	IncF RST(F-:A-:B-):FIA(-);FIB(-);FIC(-);FII(-);FIIK(-);FIIS(-);FIIY(-)	207854	53.4462	Klebsiella pneumoniae	Klebsiella pneumoniae (573)	Klebsiella (570)	Enterobacteriaceae (543)	Enterobacterales (91347)	Gammaproteobacteria (1236)	Proteobacteria (1224)	Bacteria (2)	5.96047	7.88162
NZ_CP056568.1	0.0699663	0	130	286	circular	2020-08-03	United Kingdom	United Kingdom	54.7024	-3.27658	Wastewater influent sample		culture	IncFIB(K)(pCAV1099-114)_1, CP011596,	IncF RST(F-:A-:B-):FIA(-);FIB(-);FIC(-);FII(-);FIIK(-);FIIS(-);FIIY(-)	202470	52.0635	Klebsiella oxytoca	Klebsiella oxytoca (571)	Klebsiella (570)	Enterobacteriaceae (543)	Enterobacterales (91347)	Gammaproteobacteria (1236)	Proteobacteria (1224)	Bacteria (2)	5.17983	7.89669
NZ_CP061390.1	0.0699663	0	130	287	circular	2020-09-11	USA: Chicago, IL		41.8945	-87.6208	unknown	Homo sapiens		IncFIB(K)_1, JN233704,	IncF RST(F-:A-:B-):FIA(-);FIB(-);FIC(-);FII(-);FIIK(-);FIIS(-);FIIY(-)	183887	52.8683	Klebsiella pneumoniae	Klebsiella pneumoniae (573)	Klebsiella (570)	Enterobacteriaceae (543)	Enterobacterales (91347)	Gammaproteobacteria (1236)	Proteobacteria (1224)	Bacteria (2)	5.86971	7.83502
CP026851.1	0.0699663	0	130	288	linear	2018-02-20	missing				missing	missing		IncFIB(pECLA)_1, CP001919, |IncFII(pECLA)_1, CP001919,	IncF RST(F-:A-:B-):FIA(-);FIB(-);FIC(-);FII(-);FIIK(-);FIIS(-);FIIY(-)	150426	54.1043	Enterobacter cloacae	Enterobacter cloacae (550)	Enterobacter (547)	Enterobacteriaceae (543)	Enterobacterales (91347)	Gammaproteobacteria (1236)	Proteobacteria (1224)	Bacteria (2)	4.93476	7.16171
NZ_CP062995.1	0.0702918	0	129	289	circular	2020-10-13	Russia: Moscow		55.76	37.62	sputum	Homo sapiens		IncFIB(K)_1, JN233704, |IncFII(K)_1, CP000648,	IncF RST(K8:A-:B-):FIA(-);FIB(-);FIC(-);FII(-);FIIK(8);FIIS(-);FIIY(-)	226542	52.0914	Klebsiella pneumoniae	Klebsiella pneumoniae (573)	Klebsiella (570)	Enterobacteriaceae (543)	Enterobacterales (91347)	Gammaproteobacteria (1236)	Proteobacteria (1224)	Bacteria (2)	5.89812	7.8966
NZ_CP064259.1	0.0702918	0	129	290	circular	2020-11-12	China:Nanchang	China,Nanchang	28.6793	115.889	blood		whole organism	IncFIB(pKPHS1)_1, CP003223, |IncHI1B(pNDM-MAR)_1, JN420336, |repB_KLEB_VIR, AP006726,	IncF RST(F-:A-:B-):FIA(-);FIB(-);FIC(-);FII(-);FIIK(-);FIIS(-);FIIY(-)|IncHI1 MLST(-):HCM1_043(-);HCM1_064(-);HCM1_099(-);HCM1_116(-);HCM1_178ac(-);HCM1_259(-);(-)	394328	50.5249	Klebsiella pneumoniae	Klebsiella pneumoniae (573)	Klebsiella (570)	Enterobacteriaceae (543)	Enterobacterales (91347)	Gammaproteobacteria (1236)	Proteobacteria (1224)	Bacteria (2)	15.2307	1.05628
NZ_CP055510.1	0.0706202	0	128	291	linear	2020-07-30	United Kingdom	United Kingdom	54.7024	-3.27658	Wastewater effluent sample		culture	IncFIB(K)_1, JN233704, |IncFII(K)_1, CP000648, |IncR_1, DQ449578,	IncF RST(K8:A-:B-):FIA(-);FIB(-);FIC(-);FII(-);FIIK(8);FIIS(-);FIIY(-)	333723	52.8291	Klebsiella pneumoniae	Klebsiella pneumoniae (573)	Klebsiella (570)	Enterobacteriaceae (543)	Enterobacterales (91347)	Gammaproteobacteria (1236)	Proteobacteria (1224)	Bacteria (2)	5.80132	7.50885
CP050276.1	0.0706202	0	128	292	circular	2020-03-29	China:Jiangxi,Nanchang		28.41	115.54	blood	Homo sapiens		IncFIB(pKPHS1)_1, CP003223, |IncHI1B(pNDM-MAR)_1, JN420336, |repB_KLEB_VIR, AP006726,	IncF RST(F-:A-:B-):FIA(-);FIB(-);FIC(-);FII(-);FIIK(-);FIIS(-);FIIY(-)|IncHI1 MLST(-):HCM1_043(-);HCM1_064(-);HCM1_099(-);HCM1_116(-);HCM1_178ac(-);HCM1_259(-);(-)	404774	50.4192	Klebsiella pneumoniae	Klebsiella pneumoniae (573)	Klebsiella (570)	Enterobacteriaceae (543)	Enterobacterales (91347)	Gammaproteobacteria (1236)	Proteobacteria (1224)	Bacteria (2)	15.2327	1.05614
NZ_CP053767.1	0.0706202	0	128	293	circular	2020-05-26	India		12.9246	79.1348	blood	Homo sapiens		IncFIB(K)_1, JN233704, |IncFII(K)_1, CP000648,	IncF RST(K5:A-:B-):FIA(-);FIB(-);FIC(-);FII(-);FIIK(5);FIIS(-);FIIY(-)	211810	52.3545	Klebsiella pneumoniae	Klebsiella pneumoniae (573)	Klebsiella (570)	Enterobacteriaceae (543)	Enterobacterales (91347)	Gammaproteobacteria (1236)	Proteobacteria (1224)	Bacteria (2)	6.24818	7.7741
NZ_CP020069.1	0.0706202	0	128	294	circular	2017-03-23	missing				missing	missing		IncFIB(K)_1, JN233704, |IncFII(K)_1, CP000648,	IncF RST(K5:A-:B-):FIA(-);FIB(-);FIC(-);FII(-);FIIK(5);FIIS(-);FIIY(-)	213013	52.363	Klebsiella pneumoniae	Klebsiella pneumoniae (573)	Klebsiella (570)	Enterobacteriaceae (543)	Enterobacterales (91347)	Gammaproteobacteria (1236)	Proteobacteria (1224)	Bacteria (2)	6.23702	7.80004
NZ_CP026752.1	0.0706202	0	128	295	circular	2018-03-03	missing				missing	missing		IncFIB(K)_1, JN233704, |IncFII(K)_1, CP000648,	IncF RST(K5:A-:B-):FIA(-);FIB(-);FIC(-);FII(-);FIIK(5);FIIS(-);FIIY(-)	211813	52.3561	Klebsiella pneumoniae	Klebsiella pneumoniae (573)	Klebsiella (570)	Enterobacteriaceae (543)	Enterobacterales (91347)	Gammaproteobacteria (1236)	Proteobacteria (1224)	Bacteria (2)	6.22581	7.77232
LR890435.1	0.0706202	0	128	296	circular	2020-10-30								IncFIB(K)_1, JN233704,	IncF RST(F-:A-:B-):FIA(-);FIB(-);FIC(-);FII(-);FIIK(-);FIIS(-);FIIY(-)	212029	53.0456	Klebsiella pneumoniae	Klebsiella pneumoniae (573)	Klebsiella (570)	Enterobacteriaceae (543)	Enterobacterales (91347)	Gammaproteobacteria (1236)	Proteobacteria (1224)	Bacteria (2)	5.7936	7.8332
NZ_CP028791.1	0.0706202	0	128	297	circular	2018-04-09	China: Chengdu, Sichuan	China,Chengdu,Sichuan	30.6428	104.068		Homo sapiens	Pure Culture	IncFIB(pNDM-Mar)_1, JN420336,	IncF RST(F-:A-:B-):FIA(-);FIB(-);FIC(-);FII(-);FIIK(-);FIIS(-);FIIY(-)	288222	46.8521	Klebsiella pneumoniae	Klebsiella pneumoniae (573)	Klebsiella (570)	Enterobacteriaceae (543)	Enterobacterales (91347)	Gammaproteobacteria (1236)	Proteobacteria (1224)	Bacteria (2)	15.641	-0.0773736
NZ_CP020855.1	0.0706202	0	128	298	circular	2017-05-25	USA: Houston		29.7107	-95.4006	respiratory	Homo sapiens		IncFII(K)_1, CP000648, |IncFIB(K)_1, JN233704,	IncF RST(K5:A-:B-):FIA(-);FIB(-);FIC(-);FII(-);FIIK(5);FIIS(-);FIIY(-)	221428	52.5349	Klebsiella pneumoniae	Klebsiella pneumoniae (573)	Klebsiella (570)	Enterobacteriaceae (543)	Enterobacterales (91347)	Gammaproteobacteria (1236)	Proteobacteria (1224)	Bacteria (2)	6.24787	7.78841
NZ_CP025038.1	0.0706202	0	128	299	circular	2017-12-08	USA: Chicago, IL		41.8945	-87.6208	urine	Homo sapiens		IncFII(K)_1, CP000648, |IncFIB(K)_1, JN233704,	IncF RST(K1:A-:B-):FIA(-);FIB(-);FIC(-);FII(-);FIIK(1);FIIS(-);FIIY(-)	199686	53.1304	Klebsiella pneumoniae	Klebsiella pneumoniae (573)	Klebsiella (570)	Enterobacteriaceae (543)	Enterobacterales (91347)	Gammaproteobacteria (1236)	Proteobacteria (1224)	Bacteria (2)	5.98547	7.8753
NZ_KT203286.1	0.0706202	0	128	300	circular	2020-06-03								IncFII(K)_1, CP000648, |IncFIB(K)_1, JN233704,	IncF RST(K5:A-:B-):FIA(-);FIB(-);FIC(-);FII(-);FIIK(5);FIIS(-);FIIY(-)	211813	52.3566	Klebsiella pneumoniae	Klebsiella pneumoniae (573)	Klebsiella (570)	Enterobacteriaceae (543)	Enterobacterales (91347)	Gammaproteobacteria (1236)	Proteobacteria (1224)	Bacteria (2)	6.21791	7.77581
NZ_MF150084.1	0.0709514	0	127	301	circular	2020-06-03	Brazil: City of Sao Paulo, State of Sao Paulo	Brazil,City of Sao Paulo,State of Sao Paulo	-22	-49	urine	Homo sapiens	single cell	IncFIB(K)_1, JN233704, |IncFII(K)_1, CP000648,	IncF RST(K1:A-:B-):FIA(-);FIB(-);FIC(-);FII(-);FIIK(1);FIIS(-);FIIY(-)	228008	53.3832	Klebsiella pneumoniae	Klebsiella pneumoniae (573)	Klebsiella (570)	Enterobacteriaceae (543)	Enterobacterales (91347)	Gammaproteobacteria (1236)	Proteobacteria (1224)	Bacteria (2)	6.02605	7.96747
CP029383.2	0.0709514	0	127	302	circular	2018-05-15	China: Dazhou, Sichuan	China,Dazhou,Sichuan	31.216	107.503		Homo sapiens	Culture	repB_KLEB_VIR, AP006726, |IncHI1B(pNDM-MAR)_1, JN420336,	IncHI1 MLST(-):HCM1_043(-);HCM1_064(-);HCM1_099(-);HCM1_116(-);HCM1_178ac(-);HCM1_259(-);(-)	178741	49.3658	Klebsiella pneumoniae subsp. pneumoniae	Klebsiella pneumoniae (573)	Klebsiella (570)	Enterobacteriaceae (543)	Enterobacterales (91347)	Gammaproteobacteria (1236)	Proteobacteria (1224)	Bacteria (2)	15.1116	1.15731
NZ_CP028181.1	0.0709514	0	127	303	circular	2018-04-04	Denmark	Denmark	56.2098	9.30008	missing	Homo sapiens		IncFII(K)_1, CP000648, |IncFIB(K)_1, JN233704,	IncF RST(K2:A-:B-):FIA(-);FIB(-);FIC(-);FII(-);FIIK(2);FIIS(-);FIIY(-)	227967	53.4235	Klebsiella pneumoniae	Klebsiella pneumoniae (573)	Klebsiella (570)	Enterobacteriaceae (543)	Enterobacterales (91347)	Gammaproteobacteria (1236)	Proteobacteria (1224)	Bacteria (2)	6.01653	7.98065
CP056442.1	0.0709514	0	127	304	circular	2020-07-27	United Kingdom	United Kingdom	54.7024	-3.27658	Wastewater influent sample		culture	IncFII(pECLA)_1, CP001919, |IncFIB(pECLA)_1, CP001919,	IncF RST(F-:A-:B-):FIA(-);FIB(-);FIC(-);FII(-);FIIK(-);FIIS(-);FIIY(-)	127569	53.8454	Enterobacter cloacae	Enterobacter cloacae (550)	Enterobacter (547)	Enterobacteriaceae (543)	Enterobacterales (91347)	Gammaproteobacteria (1236)	Proteobacteria (1224)	Bacteria (2)	4.97428	7.17998
NZ_CP008789.1	0.0709514	0	127	305	circular	2015-02-17	USA	USA	39.7837	-100.446	perirectal swab		missing	IncFII(p14)_1, JQ418538, |IncFIA(HI1)_1, AF250878,	IncF RST(F-:A-:B-):FIA(21?);FIB(-);FIC(-);FII(-);FIIK(12?);FIIS(-);FIIY(-)	133397	52.1196	Klebsiella oxytoca KONIH1	Klebsiella oxytoca (571)	Klebsiella (570)	Enterobacteriaceae (543)	Enterobacterales (91347)	Gammaproteobacteria (1236)	Proteobacteria (1224)	Bacteria (2)	5.47477	7.37338
NZ_CP026170.1	0.0709514	0	127	306	circular	2018-01-31	USA		38.9847	-77.0947						128920	51.7872	Leclercia sp. LSNIH1	Leclercia sp. LSNIH1 (1920114)	Leclercia (83654)	Enterobacteriaceae (543)	Enterobacterales (91347)	Gammaproteobacteria (1236)	Proteobacteria (1224)	Bacteria (2)	5.12215	7.24823
CP052387.1	0.0712856	0	126	307	circular	2020-05-04	South Korea: Gangwon		37.82	128.16	blood	Homo sapiens		IncFIB(K)_1, JN233704, |IncFII(pKP91)_1, CP000966,	IncF RST(K9:A-:B-):FIA(-);FIB(-);FIC(-);FII(-);FIIK(9);FIIS(-);FIIY(-)	190582	51.9719	Klebsiella pneumoniae	Klebsiella pneumoniae (573)	Klebsiella (570)	Enterobacteriaceae (543)	Enterobacterales (91347)	Gammaproteobacteria (1236)	Proteobacteria (1224)	Bacteria (2)	5.80421	8.06278
NZ_CP006663.1	0.0712856	0	126	308	circular	2015-01-21	USA		40.423	-98.7372	hospital patients			IncFII(K)_1, CP000648, |IncFIB(K)_1, JN233704,	IncF RST(K19:A-:B-):FIA(-);FIB(-);FIC(-);FII(-);FIIK(19);FIIS(-);FIIY(-)	117755	51.2106	Klebsiella pneumoniae	Klebsiella pneumoniae (573)	Klebsiella (570)	Enterobacteriaceae (543)	Enterobacterales (91347)	Gammaproteobacteria (1236)	Proteobacteria (1224)	Bacteria (2)	6.26347	7.58356
NZ_CP018818.1	0.0712856	0	126	309	circular	2016-12-28	missing				missing	missing		IncFII(K)_1, CP000648, |IncFIB(K)_1, JN233704,	IncF RST(K19:A-:B-):FIA(-);FIB(-);FIC(-);FII(-);FIIK(19);FIIS(-);FIIY(-)	117755	51.2055	Klebsiella pneumoniae	Klebsiella pneumoniae (573)	Klebsiella (570)	Enterobacteriaceae (543)	Enterobacterales (91347)	Gammaproteobacteria (1236)	Proteobacteria (1224)	Bacteria (2)	6.25174	7.56345
NZ_CP043933.1	0.0716227	0	125	310	circular	2019-09-24	China	China	34.4118	86.0327		chicken	single cell	IncFIB(pNDM-Mar)_1, JN420336, |IncHI1B(pNDM-MAR)_1, JN420336,	IncF RST(F-:A-:B-):FIA(-);FIB(-);FIC(-);FII(-);FIIK(-);FIIS(-);FIIY(-)|IncHI1 MLST(-):HCM1_043(-);HCM1_064(-);HCM1_099(-);HCM1_116(-);HCM1_178ac(-);HCM1_259(-);(-)	247938	45.9022	Klebsiella pneumoniae	Klebsiella pneumoniae (573)	Klebsiella (570)	Enterobacteriaceae (543)	Enterobacterales (91347)	Gammaproteobacteria (1236)	Proteobacteria (1224)	Bacteria (2)	15.6538	-0.0742097
NZ_CP018365.1	0.0716227	0	125	311	circular	2016-12-19	Germany: Goettingen		51.5392	9.91156	urine	Homo sapiens		IncR_1, DQ449578, |IncFIB(K)_1, JN233704, |IncFII(K)_1, CP000648,	IncF RST(K1:A-:B-):FIA(-);FIB(-);FIC(-);FII(-);FIIK(1);FIIS(-);FIIY(-)	260772	52.6736	Klebsiella pneumoniae	Klebsiella pneumoniae (573)	Klebsiella (570)	Enterobacteriaceae (543)	Enterobacterales (91347)	Gammaproteobacteria (1236)	Proteobacteria (1224)	Bacteria (2)	6.01808	7.94694
NZ_CP021710.1	0.0716227	0	125	312	circular	2017-06-10	missing				missing	missing		IncFII(K)_1, CP000648, |IncFIB(K)_1, JN233704,	IncF RST(K5:A-:B-):FIA(-);FIB(-);FIC(-);FII(-);FIIK(5);FIIS(-);FIIY(-)	214114	52.3422	Klebsiella pneumoniae	Klebsiella pneumoniae (573)	Klebsiella (570)	Enterobacteriaceae (543)	Enterobacterales (91347)	Gammaproteobacteria (1236)	Proteobacteria (1224)	Bacteria (2)	6.23909	7.81027
CP052370.1	0.0716227	0	125	313	circular	2020-05-04	South Korea: Chungbuk		36.8	127.7	blood	Homo sapiens		IncFIB(K)_1, JN233704,	IncF RST(F-:A-:B-):FIA(-);FIB(-);FIC(-);FII(-);FIIK(-);FIIS(-);FIIY(-)	147916	51.9471	Klebsiella pneumoniae	Klebsiella pneumoniae (573)	Klebsiella (570)	Enterobacteriaceae (543)	Enterobacterales (91347)	Gammaproteobacteria (1236)	Proteobacteria (1224)	Bacteria (2)	5.68348	8.2341
NZ_MN823998.1	0.0716227	0	125	314	circular	2020-08-04								IncFII(K)_1, CP000648, |IncFIB(K)_1, JN233704,	IncF RST(K1:A-:B-):FIA(-);FIB(-);FIC(-);FII(-);FIIK(1);FIIS(-);FIIY(-)	173610	52.41	Klebsiella pneumoniae	Klebsiella pneumoniae (573)	Klebsiella (570)	Enterobacteriaceae (543)	Enterobacterales (91347)	Gammaproteobacteria (1236)	Proteobacteria (1224)	Bacteria (2)	6.06412	7.88518
CP052401.1	0.0716227	0	125	315	circular	2020-05-04	South Korea: Gangwon		37.82	128.16	blood	Homo sapiens		IncFIB(K)_1, JN233704, |IncFII(K)_1, CP000648,	IncF RST(K7:A-:B-):FIA(-);FIB(-);FIC(-);FII(-);FIIK(7);FIIS(-);FIIY(-)	209825	52.3598	Klebsiella pneumoniae	Klebsiella pneumoniae (573)	Klebsiella (570)	Enterobacteriaceae (543)	Enterobacterales (91347)	Gammaproteobacteria (1236)	Proteobacteria (1224)	Bacteria (2)	6.03796	7.89875
CP056454.1	0.0716227	0	125	316	circular	2020-07-28	United Kingdom	United Kingdom	54.7024	-3.27658	Freshwater sample from downstream of wastewater treatment plant		culture	IncFIB(K)(pCAV1099-114)_1, CP011596,	IncF RST(F-:A-:B-):FIA(-);FIB(-);FIC(-);FII(-);FIIK(-);FIIS(-);FIIY(-)	174047	50.8501	Klebsiella oxytoca	Klebsiella oxytoca (571)	Klebsiella (570)	Enterobacteriaceae (543)	Enterobacterales (91347)	Gammaproteobacteria (1236)	Proteobacteria (1224)	Bacteria (2)	5.25087	7.81358
NZ_CP056553.1	0.0719629	0	124	317	circular	2020-08-03	United Kingdom	United Kingdom	54.7024	-3.27658	Freshwater sample from downstream of wastewater treatment plant		culture	IncFIA(HI1)_1, AF250878, |IncFII(p14)_1, JQ418538,	IncF RST(F-:A-:B-):FIA(21?);FIB(-);FIC(-);FII(-);FIIK(12?);FIIS(-);FIIY(-)	163659	52.5257	Enterobacter sp. RHBSTW-00422	Enterobacter sp. RHBSTW-00422 (2742646)	Enterobacter (547)	Enterobacteriaceae (543)	Enterobacterales (91347)	Gammaproteobacteria (1236)	Proteobacteria (1224)	Bacteria (2)	5.48978	7.42562
CP052209.1	0.0719629	0	124	318	circular	2020-05-04	South Korea: Jeonnam		34.87	126.99	blood	Homo sapiens		IncFIB(K)_1, JN233704,	IncF RST(F-:A-:B-):FIA(-);FIB(-);FIC(-);FII(-);FIIK(-);FIIS(-);FIIY(-)	152323	52.1589	Klebsiella pneumoniae	Klebsiella pneumoniae (573)	Klebsiella (570)	Enterobacteriaceae (543)	Enterobacterales (91347)	Gammaproteobacteria (1236)	Proteobacteria (1224)	Bacteria (2)	5.65686	8.22066
NZ_CP026175.1	0.0719629	0	124	319	circular	2018-01-31	USA		38.9847	-77.0947				IncFIB(K)_1, JN233704, |Col440I_1, CP023920,	IncF RST(F-:A-:B-):FIA(-);FIB(-);FIC(-);FII(-);FIIK(-);FIIS(-);FIIY(-)	172259	51.945	Klebsiella pneumoniae	Klebsiella pneumoniae (573)	Klebsiella (570)	Enterobacteriaceae (543)	Enterobacterales (91347)	Gammaproteobacteria (1236)	Proteobacteria (1224)	Bacteria (2)	5.63344	7.21399
NZ_CP030924.1	0.0719629	0	124	320	circular	2018-07-23	South Korea: Yellow sea		35.5976	129.465	blood	Phoca largha		repB_KLEB_VIR, AP006726, |IncHI1B(pNDM-MAR)_1, JN420336,	IncHI1 MLST(-):HCM1_043(-);HCM1_064(-);HCM1_099(-);HCM1_116(-);HCM1_178ac(-);HCM1_259(-);(-)	196000	50.5332	Klebsiella pneumoniae subsp. pneumoniae	Klebsiella pneumoniae (573)	Klebsiella (570)	Enterobacteriaceae (543)	Enterobacterales (91347)	Gammaproteobacteria (1236)	Proteobacteria (1224)	Bacteria (2)	15.3139	0.97137
NZ_CP015026.1	0.0723061	0	123	321	circular	2016-06-21	USA		38.9847	-77.0947				IncFIB(K)(pCAV1099-114)_1, CP011596, |IncHI1B(pNDM-MAR)_1, JN420336,	IncF RST(F-:A-:B-):FIA(-);FIB(-);FIC(-);FII(-);FIIK(-);FIIS(-);FIIY(-)|IncHI1 MLST(-):HCM1_043(-);HCM1_064(-);HCM1_099(-);HCM1_116(-);HCM1_178ac(-);HCM1_259(-);(-)	170926	50.5839	Klebsiella pneumoniae	Klebsiella pneumoniae (573)	Klebsiella (570)	Enterobacteriaceae (543)	Enterobacterales (91347)	Gammaproteobacteria (1236)	Proteobacteria (1224)	Bacteria (2)	5.14064	8.01842
NZ_CP062141.1	0.0723061	0	123	322	circular	2020-10-07	China:Jiangsu	China,Jiangsu	33	120	waste water and activated sludge		cell culture	IncFIB(K)_1, JN233704,	IncF RST(F-:A-:B-):FIA(-);FIB(-);FIC(-);FII(-);FIIK(-);FIIS(-);FIIY(-)	81122	50.4327	Klebsiella quasipneumoniae	Klebsiella quasipneumoniae (1463165)	Klebsiella (570)	Enterobacteriaceae (543)	Enterobacterales (91347)	Gammaproteobacteria (1236)	Proteobacteria (1224)	Bacteria (2)	5.48865	7.47749
NZ_CP039952.1	0.0726524	0	122	323	circular	2020-07-04	Switzerland: Bern	Switzerland,Bern	46.9483	7.45145	tracheal aspirate	dog		IncFIB(K)_1, JN233704,	IncF RST(F-:A-:B-):FIA(-);FIB(-);FIC(-);FII(-);FIIK(-);FIIS(-);FIIY(-)	156332	52.1307	Klebsiella pneumoniae	Klebsiella pneumoniae (573)	Klebsiella (570)	Enterobacteriaceae (543)	Enterobacterales (91347)	Gammaproteobacteria (1236)	Proteobacteria (1224)	Bacteria (2)	5.66419	8.2175
CP052489.1	0.0726524	0	122	324	circular	2020-05-04	South Korea: Gangwon		37.82	128.16	blood	Homo sapiens		IncFIB(K)_1, JN233704,	IncF RST(F-:A-:B-):FIA(-);FIB(-);FIC(-);FII(-);FIIK(-);FIIS(-);FIIY(-)	155463	52.1288	Klebsiella pneumoniae	Klebsiella pneumoniae (573)	Klebsiella (570)	Enterobacteriaceae (543)	Enterobacterales (91347)	Gammaproteobacteria (1236)	Proteobacteria (1224)	Bacteria (2)	5.66824	8.21045
NZ_MK262712.1	0.0726524	0	122	325	circular	2020-06-04								IncFIB(pNDM-Mar)_1, JN420336, |IncHI1B(pNDM-MAR)_1, JN420336,	IncF RST(F-:A-:B-):FIA(-);FIB(-);FIC(-);FII(-);FIIK(-);FIIS(-);FIIY(-)|IncHI1 MLST(-):HCM1_043(-);HCM1_064(-);HCM1_099(-);HCM1_116(-);HCM1_178ac(-);HCM1_259(-);(-)	278636	46.8805	Klebsiella pneumoniae	Klebsiella pneumoniae (573)	Klebsiella (570)	Enterobacteriaceae (543)	Enterobacterales (91347)	Gammaproteobacteria (1236)	Proteobacteria (1224)	Bacteria (2)	15.6511	-0.0754133
NZ_MH745929.1	0.0726524	0	122	326	circular	2020-06-03								IncFIB(K)_1, JN233704,	IncF RST(F-:A-:B-):FIA(-);FIB(-);FIC(-);FII(-);FIIK(-);FIIS(-);FIIY(-)	154745	52.1335	Klebsiella pneumoniae	Klebsiella pneumoniae (573)	Klebsiella (570)	Enterobacteriaceae (543)	Enterobacterales (91347)	Gammaproteobacteria (1236)	Proteobacteria (1224)	Bacteria (2)	5.66623	8.22001
NZ_CP064175.1	0.0726524	0	122	327	circular	2020-11-11	China:henan	China,henan	34	114	Anal swab	swine	mixed culture	IncFIB(K)_1, JN233704, |IncFII(pKP91)_1, CP000966,	IncF RST(K9:A-:B-):FIA(-);FIB(-);FIC(-);FII(-);FIIK(9);FIIS(-);FIIY(-)	168672	51.1923	Klebsiella pneumoniae	Klebsiella pneumoniae (573)	Klebsiella (570)	Enterobacteriaceae (543)	Enterobacterales (91347)	Gammaproteobacteria (1236)	Proteobacteria (1224)	Bacteria (2)	5.86184	8.3815
NZ_CP028543.1	0.0726524	0	122	328	circular	2018-04-05	China: Zigong, Sichuan	China,Zigong,Sichuan	29.3415	104.765		Homo sapiens	Culture	IncFIB(K)_1, JN233704, |IncFII(K)_1, CP000648,	IncF RST(K1:A-:B-):FIA(-);FIB(-);FIC(-);FII(-);FIIK(1);FIIS(-);FIIY(-)	159355	52.2393	Klebsiella pneumoniae subsp. pneumoniae	Klebsiella pneumoniae (573)	Klebsiella (570)	Enterobacteriaceae (543)	Enterobacterales (91347)	Gammaproteobacteria (1236)	Proteobacteria (1224)	Bacteria (2)	6.08094	7.87828
CP052373.1	0.0726524	0	122	329	circular	2020-05-04	South Korea: Chungbuk		36.8	127.7	blood	Homo sapiens		IncFIB(K)(pCAV1099-114)_1, CP011596,	IncF RST(F-:A-:B-):FIA(-);FIB(-);FIC(-);FII(-);FIIK(-);FIIS(-);FIIY(-)	202177	52.2715	Klebsiella pneumoniae	Klebsiella pneumoniae (573)	Klebsiella (570)	Enterobacteriaceae (543)	Enterobacterales (91347)	Gammaproteobacteria (1236)	Proteobacteria (1224)	Bacteria (2)	5.15427	7.89522
NZ_CP007729.1	0.0726524	0	122	330	circular	2015-01-21								IncFIB(K)_1, JN233704, |IncFII(K)_1, CP000648,	IncF RST(K1:A-:B-):FIA(-);FIB(-);FIC(-);FII(-);FIIK(1);FIIS(-);FIIY(-)	243824	53.2249	Klebsiella pneumoniae subsp. pneumoniae KPNIH10	Klebsiella pneumoniae (573)	Klebsiella (570)	Enterobacteriaceae (543)	Enterobacterales (91347)	Gammaproteobacteria (1236)	Proteobacteria (1224)	Bacteria (2)	5.99951	7.91814
LR890588.1	0.0726524	0	122	331	circular	2020-10-30								IncFIB(K)_1, JN233704, |IncFII(K)_1, CP000648,	IncF RST(K15:A-:B-):FIA(-);FIB(-);FIC(-);FII(-);FIIK(15);FIIS(-);FIIY(-)	210253	52.5324	Klebsiella pneumoniae	Klebsiella pneumoniae (573)	Klebsiella (570)	Enterobacteriaceae (543)	Enterobacterales (91347)	Gammaproteobacteria (1236)	Proteobacteria (1224)	Bacteria (2)	5.66351	7.26554
LR890282.1	0.0726524	0	122	332	circular	2020-10-30								IncFIB(K)_1, JN233704, |IncFII(K)_1, CP000648,	IncF RST(K15:A-:B-):FIA(-);FIB(-);FIC(-);FII(-);FIIK(15);FIIS(-);FIIY(-)	249552	53.1168	Klebsiella pneumoniae	Klebsiella pneumoniae (573)	Klebsiella (570)	Enterobacteriaceae (543)	Enterobacterales (91347)	Gammaproteobacteria (1236)	Proteobacteria (1224)	Bacteria (2)	5.67055	7.26724
LR890596.1	0.0726524	0	122	333	circular	2020-10-30								IncFIB(K)_1, JN233704, |IncQ1_1, M28829, |IncFII(K)_1, CP000648,	IncF RST(K8:A-:B-):FIA(-);FIB(-);FIC(-);FII(-);FIIK(8);FIIS(-);FIIY(-)	244314	53.2536	Klebsiella pneumoniae	Klebsiella pneumoniae (573)	Klebsiella (570)	Enterobacteriaceae (543)	Enterobacterales (91347)	Gammaproteobacteria (1236)	Proteobacteria (1224)	Bacteria (2)	5.98581	7.89246
CP052270.1	0.0726524	0	122	334	circular	2020-05-04	South Korea: Jeonnam		34.87	126.99	blood	Homo sapiens		IncFIB(K)_1, JN233704,	IncF RST(F-:A-:B-):FIA(-);FIB(-);FIC(-);FII(-);FIIK(-);FIIS(-);FIIY(-)	157059	52.132	Klebsiella pneumoniae	Klebsiella pneumoniae (573)	Klebsiella (570)	Enterobacteriaceae (543)	Enterobacterales (91347)	Gammaproteobacteria (1236)	Proteobacteria (1224)	Bacteria (2)	5.66551	8.22515
NZ_MT560060.1	0.0726524	0	122	335	circular	2020-11-17								IncFIB(K)_1, JN233704, |IncFII(K)_1, CP000648,	IncF RST(K2:A-:B-):FIA(-);FIB(-);FIC(-);FII(-);FIIK(2);FIIS(-);FIIY(-)	226975	53.2257	Klebsiella pneumoniae	Klebsiella pneumoniae (573)	Klebsiella (570)	Enterobacteriaceae (543)	Enterobacterales (91347)	Gammaproteobacteria (1236)	Proteobacteria (1224)	Bacteria (2)	6.01548	7.93854
NZ_CP026135.1	0.0726524	0	122	336	circular	2019-02-01	China: Fujian Province		26.0939	119.313	sputum	Homo sapiens		IncFIB(K)_1, JN233704, |IncFII(K)_1, CP000648,	IncF RST(K1:A-:B-):FIA(-);FIB(-);FIC(-);FII(-);FIIK(1);FIIS(-);FIIY(-)	161567	52.1728	Klebsiella pneumoniae	Klebsiella pneumoniae (573)	Klebsiella (570)	Enterobacteriaceae (543)	Enterobacterales (91347)	Gammaproteobacteria (1236)	Proteobacteria (1224)	Bacteria (2)	6.06601	7.88311
NZ_CP024508.1	0.0730018	0	121	337	circular	2017-11-08								IncFIB(K)_1, JN233704, |IncFII(K)_1, CP000648,	IncF RST(K21:A-:B-):FIA(-);FIB(-);FIC(-);FII(-);FIIK(21);FIIS(-);FIIY(-)	228353	52.1333	Klebsiella pneumoniae	Klebsiella pneumoniae (573)	Klebsiella (570)	Enterobacteriaceae (543)	Enterobacterales (91347)	Gammaproteobacteria (1236)	Proteobacteria (1224)	Bacteria (2)	17.9145	16.0174
NC_022078.1	0.0730018	0	121	338	circular	2013-08-14						Homo sapiens		IncR_1, DQ449578, |IncFIB(K)_1, JN233704, |IncFII(K)_1, CP000648,	IncF RST(K1:A-:B-):FIA(-);FIB(-);FIC(-);FII(-);FIIK(1);FIIS(-);FIIY(-)	317154	53.0455	Klebsiella pneumoniae JM45	Klebsiella pneumoniae (573)	Klebsiella (570)	Enterobacteriaceae (543)	Enterobacterales (91347)	Gammaproteobacteria (1236)	Proteobacteria (1224)	Bacteria (2)	5.98872	7.98216
NZ_LR130540.1	0.0733545	0	120	339	linear	2019-01-10					urine			IncFIB(K)(pCAV1099-114)_1, CP011596, |IncFII(pKP91)_1, CP000966,	IncF RST(K12:A-:B-):FIA(-);FIB(-);FIC(-);FII(-);FIIK(12);FIIS(-);FIIY(-)	165705	52.5265	Klebsiella variicola	Klebsiella variicola (244366)	Klebsiella (570)	Enterobacteriaceae (543)	Enterobacterales (91347)	Gammaproteobacteria (1236)	Proteobacteria (1224)	Bacteria (2)	5.88327	7.72086
CP052521.1	0.0733545	0	120	340	circular	2020-05-04	South Korea: Gyeonggi		37.66	126.77	blood	Homo sapiens		IncFIB(K)_1, JN233704, |Col(pHAD28)_1, KU674895, |IncFII(pKP91)_1, CP000966,	IncF RST(K9:A-:B-):FIA(-);FIB(-);FIC(-);FII(-);FIIK(9);FIIS(-);FIIY(-)	238348	52.1385	Klebsiella pneumoniae	Klebsiella pneumoniae (573)	Klebsiella (570)	Enterobacteriaceae (543)	Enterobacterales (91347)	Gammaproteobacteria (1236)	Proteobacteria (1224)	Bacteria (2)	5.6244	8.66962
NZ_CP053365.1	0.0733545	0	120	341	circular	2020-05-13	India		12.9165	79.1325	blood	Homo sapiens		IncC_1, JN157804, |IncFIB(K)_1, JN233704, |IncFII(pKP91)_1, CP000966,	IncF RST(F-:A-:B-):FIA(-);FIB(-);FIC(-);FII(-);FIIK(~25);FIIS(-);FIIY(-)	329160	52.2393	Klebsiella pneumoniae	Klebsiella pneumoniae (573)	Klebsiella (570)	Enterobacteriaceae (543)	Enterobacterales (91347)	Gammaproteobacteria (1236)	Proteobacteria (1224)	Bacteria (2)	5.98381	8.02919
CP052504.1	0.0733545	0	120	342	circular	2020-05-04	South Korea: Gyeonggi		37.66	126.77	blood	Homo sapiens		IncFIB(K)_1, JN233704, |Col(pHAD28)_1, KU674895, |IncFII(pKP91)_1, CP000966,	IncF RST(K9:A-:B-):FIA(-);FIB(-);FIC(-);FII(-);FIIK(9);FIIS(-);FIIY(-)	238155	52.1408	Klebsiella pneumoniae	Klebsiella pneumoniae (573)	Klebsiella (570)	Enterobacteriaceae (543)	Enterobacterales (91347)	Gammaproteobacteria (1236)	Proteobacteria (1224)	Bacteria (2)	5.62137	8.6671
NZ_CP011596.1	0.0733545	0	120	343	circular	2015-06-18	USA:Virginia		38.14	-78.45	Perirectal	Homo sapiens		IncFIB(K)(pCAV1099-114)_1, CP011596,	IncF RST(F-:A-:B-):FIA(-);FIB(-);FIC(-);FII(-);FIIK(-);FIIS(-);FIIY(-)	113992	51.5185	Klebsiella oxytoca	Klebsiella oxytoca (571)	Klebsiella (570)	Enterobacteriaceae (543)	Enterobacterales (91347)	Gammaproteobacteria (1236)	Proteobacteria (1224)	Bacteria (2)	-2.28823	12.0502
NZ_CP017930.1	0.0733545	0	120	344	linear	2016-11-08	USA:Virginia		38.14	-78.45	blood	Homo sapiens		IncFIB(K)(pCAV1099-114)_1, CP011596,	IncF RST(F-:A-:B-):FIA(-);FIB(-);FIC(-);FII(-);FIIK(-);FIIS(-);FIIY(-)	114139	51.4907	Klebsiella oxytoca	Klebsiella oxytoca (571)	Klebsiella (570)	Enterobacteriaceae (543)	Enterobacterales (91347)	Gammaproteobacteria (1236)	Proteobacteria (1224)	Bacteria (2)	-2.29229	12.0507
NZ_CP011617.1	0.0733545	0	120	345	linear	2015-06-18	USA:Virginia		38.14	-78.45	Urine/Genitourinary	Homo sapiens		IncFIB(K)(pCAV1099-114)_1, CP011596,	IncF RST(F-:A-:B-):FIA(-);FIB(-);FIC(-);FII(-);FIIK(-);FIIS(-);FIIY(-)	115319	51.4772	Klebsiella oxytoca	Klebsiella oxytoca (571)	Klebsiella (570)	Enterobacteriaceae (543)	Enterobacterales (91347)	Gammaproteobacteria (1236)	Proteobacteria (1224)	Bacteria (2)	-2.22645	12.0702
AP022413.1	0.0733545	0	120	346	circular	2020-10-09	Japan:Tokyo	Japan,Tokyo	34.6969	139.405				IncR_1, DQ449578, |IncFIB(K)_1, JN233704,	IncF RST(F-:A-:B-):FIA(-);FIB(-);FIC(-);FII(-);FIIK(-);FIIS(-);FIIY(-)	172805	53.2722	Klebsiella quasipneumoniae	Klebsiella quasipneumoniae (1463165)	Klebsiella (570)	Enterobacteriaceae (543)	Enterobacterales (91347)	Gammaproteobacteria (1236)	Proteobacteria (1224)	Bacteria (2)	5.59393	7.30129
CP052445.1	0.0733545	0	120	347	circular	2020-05-04	South Korea: Gangwon		37.82	128.16	blood	Homo sapiens		repB_KLEB_VIR, AP006726,		126164	49.339	Klebsiella pneumoniae	Klebsiella pneumoniae (573)	Klebsiella (570)	Enterobacteriaceae (543)	Enterobacterales (91347)	Gammaproteobacteria (1236)	Proteobacteria (1224)	Bacteria (2)	15.3102	0.984858
NZ_KY271405.1	0.0737105	0	119	348	circular	2020-06-03								IncFIB(K)_1, JN233704,	IncF RST(F-:A-:B-):FIA(-);FIB(-);FIC(-);FII(-);FIIK(-);FIIS(-);FIIY(-)	133069	51.562	Klebsiella pneumoniae	Klebsiella pneumoniae (573)	Klebsiella (570)	Enterobacteriaceae (543)	Enterobacterales (91347)	Gammaproteobacteria (1236)	Proteobacteria (1224)	Bacteria (2)	5.63049	8.20999
NZ_MF156696.1	0.0737105	0	119	349	circular	2020-06-03								IncFIB(K)_1, JN233704, |Col440I_1, CP023920, |IncFII(pKP91)_1, CP000966,	IncF RST(K9:A-:B-):FIA(-);FIB(-);FIC(-);FII(-);FIIK(9);FIIS(-);FIIY(-)	244622	52.0031	Klebsiella pneumoniae	Klebsiella pneumoniae (573)	Klebsiella (570)	Enterobacteriaceae (543)	Enterobacterales (91347)	Gammaproteobacteria (1236)	Proteobacteria (1224)	Bacteria (2)	5.61055	8.71492
NC_017541.1	0.0737105	0	119	350	circular	2012-05-02								IncHI1B(pNDM-MAR)_1, JN420336, |repB_KLEB_VIR, AP006726,	IncHI1 MLST(-):HCM1_043(-);HCM1_064(-);HCM1_099(-);HCM1_116(-);HCM1_178ac(-);HCM1_259(-);(-)	202852	50.1696	Klebsiella pneumoniae KCTC 2242	Klebsiella pneumoniae (573)	Klebsiella (570)	Enterobacteriaceae (543)	Enterobacterales (91347)	Gammaproteobacteria (1236)	Proteobacteria (1224)	Bacteria (2)	15.3152	0.974587
NZ_LR134211.1	0.0737105	0	119	351	circular	2018-12-19								repB_KLEB_VIR, AP006726, |IncHI1B(pNDM-MAR)_1, JN420336,	IncHI1 MLST(-):HCM1_043(-);HCM1_064(-);HCM1_099(-);HCM1_116(-);HCM1_178ac(-);HCM1_259(-);(-)	205331	50.1965	Klebsiella pneumoniae	Klebsiella pneumoniae (573)	Klebsiella (570)	Enterobacteriaceae (543)	Enterobacterales (91347)	Gammaproteobacteria (1236)	Proteobacteria (1224)	Bacteria (2)	15.3135	0.97024
NZ_CP004000.1	0.0737105	0	119	352	circular	2015-01-21	Brazil	Brazil	-10.3333	-53.2		Homo sapiens		IncHI1B(pNDM-MAR)_1, JN420336, |IncFIB(pNDM-Mar)_1, JN420336,	IncHI1 MLST(-):HCM1_043(-);HCM1_064(-);HCM1_099(-);HCM1_116(-);HCM1_178ac(-);HCM1_259(-);(-)|IncF RST(F-:A-:B-):FIA(-);FIB(-);FIC(-);FII(-);FIIK(-);FIIS(-);FIIY(-)	295493	47.9453	Klebsiella pneumoniae subsp. pneumoniae Kp13	Klebsiella pneumoniae (573)	Klebsiella (570)	Enterobacteriaceae (543)	Enterobacterales (91347)	Gammaproteobacteria (1236)	Proteobacteria (1224)	Bacteria (2)	15.6593	-0.0676499
CP052525.1	0.0737105	0	119	353	circular	2020-05-04	South Korea: Gyeonggi		37.66	126.77	blood	Homo sapiens		IncFIB(K)_1, JN233704, |IncFII(K)_1, CP000648,	IncF RST(K2:A-:B-):FIA(-);FIB(-);FIC(-);FII(-);FIIK(2);FIIS(-);FIIY(-)	162979	52.2687	Klebsiella pneumoniae	Klebsiella pneumoniae (573)	Klebsiella (570)	Enterobacteriaceae (543)	Enterobacterales (91347)	Gammaproteobacteria (1236)	Proteobacteria (1224)	Bacteria (2)	5.74498	7.19642
CP052302.1	0.0737105	0	119	354	circular	2020-05-04	South Korea: Jeonnam		34.87	126.99	blood	Homo sapiens		IncFIB(K)_1, JN233704, |Col(pHAD28)_1, KU674895, |IncFII(pKP91)_1, CP000966,	IncF RST(K9:A-:B-):FIA(-);FIB(-);FIC(-);FII(-);FIIK(9);FIIS(-);FIIY(-)	245485	52.1726	Klebsiella pneumoniae	Klebsiella pneumoniae (573)	Klebsiella (570)	Enterobacteriaceae (543)	Enterobacterales (91347)	Gammaproteobacteria (1236)	Proteobacteria (1224)	Bacteria (2)	5.62451	8.66097
LR890396.1	0.0737105	0	119	355	circular	2020-10-30								IncFIB(K)_1, JN233704, |IncFII(K)_1, CP000648,	IncF RST(K1:A-:B-):FIA(-);FIB(-);FIC(-);FII(-);FIIK(1);FIIS(-);FIIY(-)	227214	52.2094	Klebsiella pneumoniae	Klebsiella pneumoniae (573)	Klebsiella (570)	Enterobacteriaceae (543)	Enterobacterales (91347)	Gammaproteobacteria (1236)	Proteobacteria (1224)	Bacteria (2)	17.8587	16.1073
NZ_CP028792.1	0.0737105	0	119	356	circular	2018-04-09	China: Chengdu, Sichuan	China,Chengdu,Sichuan	30.6428	104.068		Homo sapiens	Pure Culture	IncFIB(K)_1, JN233704,	IncF RST(F-:A-:B-):FIA(-);FIB(-);FIC(-);FII(-);FIIK(-);FIIS(-);FIIY(-)	125009	51.9955	Klebsiella pneumoniae	Klebsiella pneumoniae (573)	Klebsiella (570)	Enterobacteriaceae (543)	Enterobacterales (91347)	Gammaproteobacteria (1236)	Proteobacteria (1224)	Bacteria (2)	5.62061	8.54501
NC_021654.1	0.0737105	0	119	357	circular	2013-07-05								IncFII(K)_1, CP000648, |IncFIB(K)_1, JN233704,	IncF RST(K1:A-:B-):FIA(-);FIB(-);FIC(-);FII(-);FIIK(1);FIIS(-);FIIY(-)	245869	52.8147	Klebsiella pneumoniae	Klebsiella pneumoniae (573)	Klebsiella (570)	Enterobacteriaceae (543)	Enterobacterales (91347)	Gammaproteobacteria (1236)	Proteobacteria (1224)	Bacteria (2)	5.97844	7.97857
NZ_CP056151.1	0.0737105	0	119	358	circular	2020-08-03	United Kingdom	United Kingdom	54.7024	-3.27658	Wastewater influent sample		culture	IncFIB(K)(pCAV1099-114)_1, CP011596,	IncF RST(F-:A-:B-):FIA(-);FIB(-);FIC(-);FII(-);FIIK(-);FIIS(-);FIIY(-)	201629	50.5151	Klebsiella grimontii	Klebsiella grimontii (2058152)	Klebsiella (570)	Enterobacteriaceae (543)	Enterobacterales (91347)	Gammaproteobacteria (1236)	Proteobacteria (1224)	Bacteria (2)	5.24162	7.87909
NZ_AP023338.1	0.0737105	0	119	359	circular	2020-09-26	Viet Nam:Hanoi		21.0277	105.834		Homo sapiens		IncFIB(pNDM-Mar)_1, JN420336, |IncHI1B(pNDM-MAR)_1, JN420336,	IncF RST(F-:A-:B-):FIA(-);FIB(-);FIC(-);FII(-);FIIK(-);FIIS(-);FIIY(-)|IncHI1 MLST(-):HCM1_043(-);HCM1_064(-);HCM1_099(-);HCM1_116(-);HCM1_178ac(-);HCM1_259(-);(-)	288040	46.6692	Klebsiella pneumoniae	Klebsiella pneumoniae (573)	Klebsiella (570)	Enterobacteriaceae (543)	Enterobacterales (91347)	Gammaproteobacteria (1236)	Proteobacteria (1224)	Bacteria (2)	15.6545	-0.0751176
NZ_CP023488.1	0.0740698	0	118	360	circular	2017-11-16	South Africa: Durban		-29.8343	30.9987	missing	Homo sapiens		IncFIB(K)_1, JN233704, |IncFII(K)_1, CP000648,	IncF RST(K13:A-:B-):FIA(-);FIB(-);FIC(-);FII(-);FIIK(13);FIIS(-);FIIY(-)	223434	51.4483	Klebsiella pneumoniae subsp. pneumoniae	Klebsiella pneumoniae (573)	Klebsiella (570)	Enterobacteriaceae (543)	Enterobacterales (91347)	Gammaproteobacteria (1236)	Proteobacteria (1224)	Bacteria (2)	6.29329	7.75785
NZ_CP056433.1	0.0740698	0	118	361	circular	2020-08-03	United Kingdom	United Kingdom	54.7024	-3.27658	Wastewater influent sample		culture	IncFIB(K)(pCAV1099-114)_1, CP011596,	IncF RST(F-:A-:B-):FIA(-);FIB(-);FIC(-);FII(-);FIIK(-);FIIS(-);FIIY(-)	206782	51.4058	Klebsiella pneumoniae	Klebsiella pneumoniae (573)	Klebsiella (570)	Enterobacteriaceae (543)	Enterobacterales (91347)	Gammaproteobacteria (1236)	Proteobacteria (1224)	Bacteria (2)	5.18094	7.90422
LR890210.1	0.0740698	0	118	362	circular	2020-10-30								IncFIB(K)_1, JN233704, |IncFII(K)_1, CP000648,	IncF RST(K15:A-:B-):FIA(-);FIB(-);FIC(-);FII(-);FIIK(15);FIIS(-);FIIY(-)	197166	51.1949	Klebsiella pneumoniae	Klebsiella pneumoniae (573)	Klebsiella (570)	Enterobacteriaceae (543)	Enterobacterales (91347)	Gammaproteobacteria (1236)	Proteobacteria (1224)	Bacteria (2)	5.63635	7.27201
LR890711.1	0.0740698	0	118	363	circular	2020-10-30	Australia: Melbourne		-37.8457	144.982	rectal swab	Homo sapiens		IncFIB(K)_1, JN233704, |IncFII(pKP91)_1, CP000966,	IncF RST(K12:A-:B-):FIA(-);FIB(-);FIC(-);FII(-);FIIK(12);FIIS(-);FIIY(-)	214404	51.3703	Klebsiella pneumoniae	Klebsiella pneumoniae (573)	Klebsiella (570)	Enterobacteriaceae (543)	Enterobacterales (91347)	Gammaproteobacteria (1236)	Proteobacteria (1224)	Bacteria (2)	5.64945	8.57824
NZ_CP056386.1	0.0740698	0	118	364	circular	2020-08-03	United Kingdom	United Kingdom	54.7024	-3.27658	Freshwater sample from downstream of wastewater treatment plant		culture	IncFIB(K)_1, JN233704, |IncFII(K)_1, CP000648,	IncF RST(K15:A-:B-):FIA(-);FIB(-);FIC(-);FII(-);FIIK(15);FIIS(-);FIIY(-)	252882	52.4679	Klebsiella pneumoniae	Klebsiella pneumoniae (573)	Klebsiella (570)	Enterobacteriaceae (543)	Enterobacterales (91347)	Gammaproteobacteria (1236)	Proteobacteria (1224)	Bacteria (2)	5.64848	7.315
NZ_CP032169.1	0.0744324	0	117	365	circular	2018-09-19	missing				missing	missing		IncFIB(K)_1, JN233704, |IncFIA(HI1)_1, AF250878,	IncF RST(F-:A13:B-):FIA(13);FIB(-);FIC(-);FII(-);FIIK(-);FIIS(-);FIIY(-)	171589	52.1187	Klebsiella pneumoniae	Klebsiella pneumoniae (573)	Klebsiella (570)	Enterobacteriaceae (543)	Enterobacterales (91347)	Gammaproteobacteria (1236)	Proteobacteria (1224)	Bacteria (2)	5.71438	7.15604
NZ_MN824000.1	0.0744324	0	117	366	circular	2020-08-04								IncFIB(K)_1, JN233704, |IncFII(K)_1, CP000648,	IncF RST(K2:A-:B-):FIA(-);FIB(-);FIC(-);FII(-);FIIK(2);FIIS(-);FIIY(-)	187052	51.8321	Klebsiella pneumoniae	Klebsiella pneumoniae (573)	Klebsiella (570)	Enterobacteriaceae (543)	Enterobacterales (91347)	Gammaproteobacteria (1236)	Proteobacteria (1224)	Bacteria (2)	6.31858	7.77396
NZ_CP035384.1	0.0744324	0	117	367	circular	2019-02-01	China:Nanchang	China,Nanchang	28.6793	115.889	blood		cell culture	repB_KLEB_VIR, AP006726, |IncFII(K)_1, CP000648, |IncHI1B(pNDM-MAR)_1, JN420336,	IncF RST(K5:A-:B-):FIA(-);FIB(-);FIC(-);FII(-);FIIK(5);FIIS(-);FIIY(-)|IncHI1 MLST(-):HCM1_043(-);HCM1_064(-);HCM1_099(-);HCM1_116(-);HCM1_178ac(-);HCM1_259(-);(-)	357837	51.0062	Klebsiella pneumoniae	Klebsiella pneumoniae (573)	Klebsiella (570)	Enterobacteriaceae (543)	Enterobacterales (91347)	Gammaproteobacteria (1236)	Proteobacteria (1224)	Bacteria (2)	15.3102	0.985323
NZ_AP021952.1	0.0744324	0	117	368	circular	2020-08-13	Japan:Tokyo		35.6684	139.428				IncFIB(K)_1, JN233704, |IncFII(K)_1, CP000648, |IncFIA(HI1)_1, AF250878,	IncF RST(K3:A-:B-):FIA(21?);FIB(-);FIC(-);FII(-);FIIK(3);FIIS(-);FIIY(-)	206811	51.6452	Klebsiella quasipneumoniae	Klebsiella quasipneumoniae (1463165)	Klebsiella (570)	Enterobacteriaceae (543)	Enterobacterales (91347)	Gammaproteobacteria (1236)	Proteobacteria (1224)	Bacteria (2)	6.05838	7.87414
NZ_CP042866.1	0.0744324	0	117	369	circular	2019-08-22	Unknown				Unknown	Unknown		IncHI1B(pNDM-MAR)_1, JN420336,	IncHI1 MLST(-):HCM1_043(-);HCM1_064(-);HCM1_099(-);HCM1_116(-);HCM1_178ac(-);HCM1_259(-);(-)	266396	47.1422	Escherichia coli	Escherichia coli (562)	Escherichia (561)	Enterobacteriaceae (543)	Enterobacterales (91347)	Gammaproteobacteria (1236)	Proteobacteria (1224)	Bacteria (2)	15.64	-0.0953663
LR890570.1	0.0744324	0	117	370	circular	2020-10-30								IncFIB(K)_1, JN233704, |IncFII(pKP91)_1, CP000966,	IncF RST(K9:A-:B-):FIA(-);FIB(-);FIC(-);FII(-);FIIK(9);FIIS(-);FIIY(-)	186641	51.6896	Klebsiella pneumoniae	Klebsiella pneumoniae (573)	Klebsiella (570)	Enterobacteriaceae (543)	Enterobacterales (91347)	Gammaproteobacteria (1236)	Proteobacteria (1224)	Bacteria (2)	5.815	7.95453
LR890491.1	0.0744324	0	117	371	circular	2020-10-30								IncFIB(K)_1, JN233704, |IncFII(K)_1, CP000648,	IncF RST(K1:A-:B-):FIA(-);FIB(-);FIC(-);FII(-);FIIK(1);FIIS(-);FIIY(-)	196682	53.2392	Klebsiella pneumoniae	Klebsiella pneumoniae (573)	Klebsiella (570)	Enterobacteriaceae (543)	Enterobacterales (91347)	Gammaproteobacteria (1236)	Proteobacteria (1224)	Bacteria (2)	5.93098	7.87122
NZ_CP056373.1	0.0744324	0	117	372	circular	2020-08-03	United Kingdom	United Kingdom	54.7024	-3.27658	Wastewater influent sample		culture	IncFIB(K)_1, JN233704, |IncFII(K)_1, CP000648,	IncF RST(K15:A-:B-):FIA(-);FIB(-);FIC(-);FII(-);FIIK(15);FIIS(-);FIIY(-)	193688	51.5334	Klebsiella pneumoniae	Klebsiella pneumoniae (573)	Klebsiella (570)	Enterobacteriaceae (543)	Enterobacterales (91347)	Gammaproteobacteria (1236)	Proteobacteria (1224)	Bacteria (2)	5.56158	7.26107
CP052296.1	0.0744324	0	117	373	circular	2020-05-04	South Korea: Jeonnam		34.87	126.99	blood	Homo sapiens		IncFIB(K)_1, JN233704, |Col(pHAD28)_1, KU674895, |IncFII(pKP91)_1, CP000966,	IncF RST(K9:A-:B-):FIA(-);FIB(-);FIC(-);FII(-);FIIK(9);FIIS(-);FIIY(-)	234247	51.9926	Klebsiella pneumoniae	Klebsiella pneumoniae (573)	Klebsiella (570)	Enterobacteriaceae (543)	Enterobacterales (91347)	Gammaproteobacteria (1236)	Proteobacteria (1224)	Bacteria (2)	5.64678	8.66998
CP052310.1	0.0744324	0	117	374	circular	2020-05-04	South Korea: Jeonnam		34.87	126.99	blood	Homo sapiens		IncFIB(pNDM-Mar)_1, JN420336,	IncF RST(F-:A-:B-):FIA(-);FIB(-);FIC(-);FII(-);FIIK(-);FIIS(-);FIIY(-)	269619	46.6458	Klebsiella pneumoniae	Klebsiella pneumoniae (573)	Klebsiella (570)	Enterobacteriaceae (543)	Enterobacterales (91347)	Gammaproteobacteria (1236)	Proteobacteria (1224)	Bacteria (2)	15.6455	-0.0834903
NZ_KY271406.1	0.0747985	0	116	375	linear	2020-06-03								IncFII(K)_1, CP000648, |IncFIB(K)_1, JN233704,	IncF RST(K7:A-:B-):FIA(-);FIB(-);FIC(-);FII(-);FIIK(7);FIIS(-);FIIY(-)	212319	52.3952	Klebsiella pneumoniae	Klebsiella pneumoniae (573)	Klebsiella (570)	Enterobacteriaceae (543)	Enterobacterales (91347)	Gammaproteobacteria (1236)	Proteobacteria (1224)	Bacteria (2)	17.7284	16.0443
NZ_CP050355.1	0.0747985	0	116	376	circular	2020-11-05	China		39.98	116.43	sputum	Homo sapiens		IncFIB(K)_1, JN233704, |Col(pHAD28)_1, KU674895, |IncFII(pKP91)_1, CP000966,	IncF RST(K9:A-:B-):FIA(-);FIB(-);FIC(-);FII(-);FIIK(9);FIIS(-);FIIY(-)	239469	51.6539	Klebsiella pneumoniae	Klebsiella pneumoniae (573)	Klebsiella (570)	Enterobacteriaceae (543)	Enterobacterales (91347)	Gammaproteobacteria (1236)	Proteobacteria (1224)	Bacteria (2)	5.63295	8.69201
LR890241.1	0.0747985	0	116	377	circular	2020-10-30								IncFIB(K)_1, JN233704,	IncF RST(F-:A-:B-):FIA(-);FIB(-);FIC(-);FII(-);FIIK(-);FIIS(-);FIIY(-)	218412	52.1487	Klebsiella pneumoniae	Klebsiella pneumoniae (573)	Klebsiella (570)	Enterobacteriaceae (543)	Enterobacterales (91347)	Gammaproteobacteria (1236)	Proteobacteria (1224)	Bacteria (2)	17.8602	16.0824
LR890236.1	0.0747985	0	116	378	circular	2020-10-30								IncFIB(K)(pCAV1099-114)_1, CP011596,	IncF RST(F-:A-:B-):FIA(-);FIB(-);FIC(-);FII(-);FIIK(-);FIIS(-);FIIY(-)	169535	49.9625	Klebsiella pneumoniae	Klebsiella pneumoniae (573)	Klebsiella (570)	Enterobacteriaceae (543)	Enterobacterales (91347)	Gammaproteobacteria (1236)	Proteobacteria (1224)	Bacteria (2)	5.17641	7.87294
LR890723.1	0.0747985	0	116	379	circular	2020-10-30	Australia: Melbourne		-37.8457	144.982	rectal swab	Homo sapiens		IncFIB(K)_1, JN233704, |IncFII(K)_1, CP000648,	IncF RST(K7:A-:B-):FIA(-);FIB(-);FIC(-);FII(-);FIIK(7);FIIS(-);FIIY(-)	225937	52.296	Klebsiella pneumoniae	Klebsiella pneumoniae (573)	Klebsiella (570)	Enterobacteriaceae (543)	Enterobacterales (91347)	Gammaproteobacteria (1236)	Proteobacteria (1224)	Bacteria (2)	17.8402	16.0894
NZ_CP041645.1	0.0747985	0	116	380	circular	2019-07-30	China: Tianjin	China,Tianjin	39.1236	117.198	gut		pure culture	IncFIB(K)_1, JN233704,	IncF RST(F-:A-:B-):FIA(-);FIB(-);FIC(-);FII(-);FIIK(-);FIIS(-);FIIY(-)	114444	51.4208	Klebsiella pneumoniae	Klebsiella pneumoniae (573)	Klebsiella (570)	Enterobacteriaceae (543)	Enterobacterales (91347)	Gammaproteobacteria (1236)	Proteobacteria (1224)	Bacteria (2)	5.4872	7.44883
CP052400.1	0.0747985	0	116	381	circular	2020-05-04	South Korea: Gangwon		37.82	128.16	blood	Homo sapiens		IncFIB(pNDM-Mar)_1, JN420336, |IncHI1B(pNDM-MAR)_1, JN420336,	IncF RST(F-:A-:B-):FIA(-);FIB(-);FIC(-);FII(-);FIIK(-);FIIS(-);FIIY(-)|IncHI1 MLST(-):HCM1_043(-);HCM1_064(-);HCM1_099(-);HCM1_116(-);HCM1_178ac(-);HCM1_259(-);(-)	226050	46.2407	Klebsiella pneumoniae	Klebsiella pneumoniae (573)	Klebsiella (570)	Enterobacteriaceae (543)	Enterobacterales (91347)	Gammaproteobacteria (1236)	Proteobacteria (1224)	Bacteria (2)	15.6548	-0.0779897
LR134219.1	0.0751681	0	115	382	circular	2018-12-19								IncFII(pKP91)_1, CP000966, |IncFIB(K)_1, JN233704,	IncF RST(K4:A-:B-):FIA(-);FIB(-);FIC(-);FII(-);FIIK(4);FIIS(-);FIIY(-)	190626	52.5736	Klebsiella pneumoniae	Klebsiella pneumoniae (573)	Klebsiella (570)	Enterobacteriaceae (543)	Enterobacterales (91347)	Gammaproteobacteria (1236)	Proteobacteria (1224)	Bacteria (2)	5.82885	7.86331
CP052242.1	0.0751681	0	115	383	circular	2020-05-04	South Korea: Jeonnam		34.87	126.99	blood	Homo sapiens		IncFIB(pNDM-Mar)_1, JN420336,	IncF RST(F-:A-:B-):FIA(-);FIB(-);FIC(-);FII(-);FIIK(-);FIIS(-);FIIY(-)	266878	46.5865	Klebsiella pneumoniae	Klebsiella pneumoniae (573)	Klebsiella (570)	Enterobacteriaceae (543)	Enterobacterales (91347)	Gammaproteobacteria (1236)	Proteobacteria (1224)	Bacteria (2)	15.6409	-0.0878702
NZ_CP041936.1	0.0751681	0	115	384	circular	2019-07-24	China:Beijing		39.92	116.46	blood	Homo sapiens		IncFIB(K)_1, JN233704,	IncF RST(F-:A-:B-):FIA(-);FIB(-);FIC(-);FII(-);FIIK(-);FIIS(-);FIIY(-)	239167	52.6306	Klebsiella pneumoniae	Klebsiella pneumoniae (573)	Klebsiella (570)	Enterobacteriaceae (543)	Enterobacterales (91347)	Gammaproteobacteria (1236)	Proteobacteria (1224)	Bacteria (2)	5.87418	7.83908
NZ_CP035197.1	0.0751681	0	115	385	circular	2019-10-31	Laos		19.52	102.1	stool	Homo sapiens				52349	48.4078	Klebsiella pneumoniae	Klebsiella pneumoniae (573)	Klebsiella (570)	Enterobacteriaceae (543)	Enterobacterales (91347)	Gammaproteobacteria (1236)	Proteobacteria (1224)	Bacteria (2)	5.26857	7.52636
NZ_CP050337.1	0.0751681	0	115	386	circular	2020-11-05	China		39.98	116.43	bronchoalveolar lavage	Homo sapiens		IncFIB(K)_1, JN233704, |Col(pHAD28)_1, KU674895, |IncFII(pKP91)_1, CP000966,	IncF RST(K9:A-:B-):FIA(-);FIB(-);FIC(-);FII(-);FIIK(9);FIIS(-);FIIY(-)	238333	51.6886	Klebsiella pneumoniae	Klebsiella pneumoniae (573)	Klebsiella (570)	Enterobacteriaceae (543)	Enterobacterales (91347)	Gammaproteobacteria (1236)	Proteobacteria (1224)	Bacteria (2)	5.63045	8.68047
CP052545.1	0.0751681	0	115	387	circular	2020-05-04	South Korea: Gyeonggi		37.66	126.77	blood	Homo sapiens		IncFIB(K)_1, JN233704, |Col(pHAD28)_1, KU674895, |IncFII(pKP91)_1, CP000966,	IncF RST(K9:A-:B-):FIA(-);FIB(-);FIC(-);FII(-);FIIK(9);FIIS(-);FIIY(-)	232941	51.5882	Klebsiella pneumoniae	Klebsiella pneumoniae (573)	Klebsiella (570)	Enterobacteriaceae (543)	Enterobacterales (91347)	Gammaproteobacteria (1236)	Proteobacteria (1224)	Bacteria (2)	5.62709	8.67986
NZ_CP048380.1	0.0751681	0	115	388	circular	2020-02-20	Switzerland	Switzerland	46.7986	8.23197	environment		cell culture	IncFIB(pB171)_1, AB024946, |IncFIB(pQil)_1, JN233705,	IncF RST(F-:A-:B70):FIA(-);FIB(70);FIC(-);FII(-);FIIK(-);FIIS(-);FIIY(-)	244254	53.4759	Klebsiella variicola	Klebsiella variicola (244366)	Klebsiella (570)	Enterobacteriaceae (543)	Enterobacterales (91347)	Gammaproteobacteria (1236)	Proteobacteria (1224)	Bacteria (2)	17.837	16.105
CP052380.1	0.0751681	0	115	389	circular	2020-05-04	South Korea: Chungbuk		36.8	127.7	blood	Homo sapiens		IncFIB(K)_1, JN233704, |Col(pHAD28)_1, KU674895, |IncFII(pKP91)_1, CP000966,	IncF RST(K9:A-:B-):FIA(-);FIB(-);FIC(-);FII(-);FIIK(9);FIIS(-);FIIY(-)	233096	51.5856	Klebsiella pneumoniae	Klebsiella pneumoniae (573)	Klebsiella (570)	Enterobacteriaceae (543)	Enterobacterales (91347)	Gammaproteobacteria (1236)	Proteobacteria (1224)	Bacteria (2)	5.63309	8.67325
NZ_CP042868.1	0.0751681	0	115	390	circular	2019-08-22	Unknown				Unknown	Unknown		IncHI1B(pNDM-MAR)_1, JN420336, |IncFIB(pNDM-Mar)_1, JN420336,	IncHI1 MLST(-):HCM1_043(-);HCM1_064(-);HCM1_099(-);HCM1_116(-);HCM1_178ac(-);HCM1_259(-);(-)|IncF RST(F-:A-:B-):FIA(-);FIB(-);FIC(-);FII(-);FIIK(-);FIIS(-);FIIY(-)	279992	46.9328	Escherichia coli	Escherichia coli (562)	Escherichia (561)	Enterobacteriaceae (543)	Enterobacterales (91347)	Gammaproteobacteria (1236)	Proteobacteria (1224)	Bacteria (2)	15.657	-0.0796986
CP052266.1	0.0751681	0	115	391	circular	2020-05-04	South Korea: Jeonnam		34.87	126.99	blood	Homo sapiens		IncFIB(K)_1, JN233704, |Col(pHAD28)_1, KU674895, |IncFII(pKP91)_1, CP000966,	IncF RST(K9:A-:B-):FIA(-);FIB(-);FIC(-);FII(-);FIIK(9);FIIS(-);FIIY(-)	239511	51.5709	Klebsiella pneumoniae	Klebsiella pneumoniae (573)	Klebsiella (570)	Enterobacteriaceae (543)	Enterobacterales (91347)	Gammaproteobacteria (1236)	Proteobacteria (1224)	Bacteria (2)	5.61738	8.64845
CP052269.1	0.0751681	0	115	392	circular	2020-05-04	South Korea: Jeonnam		34.87	126.99	blood	Homo sapiens		IncFIB(pNDM-Mar)_1, JN420336,	IncF RST(F-:A-:B-):FIA(-);FIB(-);FIC(-);FII(-);FIIK(-);FIIS(-);FIIY(-)	265945	46.713	Klebsiella pneumoniae	Klebsiella pneumoniae (573)	Klebsiella (570)	Enterobacteriaceae (543)	Enterobacterales (91347)	Gammaproteobacteria (1236)	Proteobacteria (1224)	Bacteria (2)	15.6361	-0.0941651
CP052558.1	0.0751681	0	115	393	circular	2020-05-04	South Korea: Seoul		37.57	126.98	blood	Homo sapiens		IncFIB(pNDM-Mar)_1, JN420336,	IncF RST(F-:A-:B-):FIA(-);FIB(-);FIC(-);FII(-);FIIK(-);FIIS(-);FIIY(-)	260706	46.6702	Klebsiella pneumoniae	Klebsiella pneumoniae (573)	Klebsiella (570)	Enterobacteriaceae (543)	Enterobacterales (91347)	Gammaproteobacteria (1236)	Proteobacteria (1224)	Bacteria (2)	15.6362	-0.0915352
NC_009649.1	0.0751681	0	115	394	circular	2007-07-24								IncFII(K)_1, CP000648, |IncFIB(K)_1, JN233704,	IncF RST(K1:A-:B-):FIA(-);FIB(-);FIC(-);FII(-);FIIK(1);FIIS(-);FIIY(-)	175879	51.6907	Klebsiella pneumoniae subsp. pneumoniae MGH 78578	Klebsiella pneumoniae (573)	Klebsiella (570)	Enterobacteriaceae (543)	Enterobacterales (91347)	Gammaproteobacteria (1236)	Proteobacteria (1224)	Bacteria (2)	6.02576	7.86096
NZ_MK181633.1	0.0751681	0	115	395	circular	2020-07-31								FII(pBK30683)_1, KF954760, |IncFIB(K)_1, JN233704, |IncHI1B(pNDM-MAR)_1, JN420336, |IncFIB(pNDM-Mar)_1, JN420336,	IncF RST(F-:A-:B-):FIA(-);FIB(-);FIC(-);FII(-);FIIK(21?);FIIS(-);FIIY(-)|IncHI1 MLST(-):HCM1_043(-);HCM1_064(-);HCM1_099(-);HCM1_116(-);HCM1_178ac(-);HCM1_259(-);(-)	479335	49.2607	Klebsiella pneumoniae	Klebsiella pneumoniae (573)	Klebsiella (570)	Enterobacteriaceae (543)	Enterobacterales (91347)	Gammaproteobacteria (1236)	Proteobacteria (1224)	Bacteria (2)	15.6497	-0.0556991
NZ_MG288679.1	0.0751681	0	115	396	circular	2020-07-31								IncFII(pKP91)_1, CP000966, |Col(pHAD28)_1, KU674895, |IncFIB(K)_1, JN233704,	IncF RST(K9:A-:B-):FIA(-);FIB(-);FIC(-);FII(-);FIIK(9);FIIS(-);FIIY(-)	238681	51.6857	Klebsiella pneumoniae	Klebsiella pneumoniae (573)	Klebsiella (570)	Enterobacteriaceae (543)	Enterobacterales (91347)	Gammaproteobacteria (1236)	Proteobacteria (1224)	Bacteria (2)	5.66526	8.71084
CP052137.1	0.0751681	0	115	397	circular	2020-05-04	South Korea: Busan		35.18	129.08	blood	Homo sapiens		IncFIB(K)_1, JN233704, |Col(pHAD28)_1, KU674895, |IncFII(pKP91)_1, CP000966,	IncF RST(K9:A-:B-):FIA(-);FIB(-);FIC(-);FII(-);FIIK(9);FIIS(-);FIIY(-)	234138	51.5867	Klebsiella pneumoniae	Klebsiella pneumoniae (573)	Klebsiella (570)	Enterobacteriaceae (543)	Enterobacterales (91347)	Gammaproteobacteria (1236)	Proteobacteria (1224)	Bacteria (2)	5.63398	8.68138
CP052450.1	0.0751681	0	115	398	circular	2020-05-04	South Korea: Gangwon		37.82	128.16	blood	Homo sapiens		IncFIB(K)_1, JN233704, |Col(pHAD28)_1, KU674895, |IncFII(pKP91)_1, CP000966,	IncF RST(K9:A-:B-):FIA(-);FIB(-);FIC(-);FII(-);FIIK(9);FIIS(-);FIIY(-)	235182	51.5545	Klebsiella pneumoniae	Klebsiella pneumoniae (573)	Klebsiella (570)	Enterobacteriaceae (543)	Enterobacterales (91347)	Gammaproteobacteria (1236)	Proteobacteria (1224)	Bacteria (2)	5.65023	8.68342
NZ_CP030071.1	0.0755413	0	114	399	circular	2019-08-06	USA: Walter Reed Army Medical Center		39	-77.07	urine	Homo sapiens		IncFII(pKP91)_1, CP000966, |IncFIB(K)_1, JN233704,	IncF RST(K27:A-:B-):FIA(-);FIB(-);FIC(-);FII(-);FIIK(27);FIIS(-);FIIY(-)	185511	51.6875	Klebsiella pneumoniae	Klebsiella pneumoniae (573)	Klebsiella (570)	Enterobacteriaceae (543)	Enterobacterales (91347)	Gammaproteobacteria (1236)	Proteobacteria (1224)	Bacteria (2)	5.77769	8.06909
NZ_CP031369.1	0.0755413	0	114	400	circular	2019-06-28	United Kingdom		51.64	-0.4	blood	Homo sapiens		IncFIB(K)_1, JN233704, |IncFII(K)_1, CP000648,	IncF RST(K1:A-:B-):FIA(-);FIB(-);FIC(-);FII(-);FIIK(1);FIIS(-);FIIY(-)	292699	51.5731	Klebsiella pneumoniae	Klebsiella pneumoniae (573)	Klebsiella (570)	Enterobacteriaceae (543)	Enterobacterales (91347)	Gammaproteobacteria (1236)	Proteobacteria (1224)	Bacteria (2)	5.97586	7.96051
LR890736.1	0.0755413	0	114	401	circular	2020-10-30								IncFIB(K)_1, JN233704, |IncFII(K)_1, CP000648,	IncF RST(K7:A-:B-):FIA(-);FIB(-);FIC(-);FII(-);FIIK(7);FIIS(-);FIIY(-)	225088	52.4226	Klebsiella pneumoniae	Klebsiella pneumoniae (573)	Klebsiella (570)	Enterobacteriaceae (543)	Enterobacterales (91347)	Gammaproteobacteria (1236)	Proteobacteria (1224)	Bacteria (2)	17.9105	16.0306
NZ_MF918373.1	0.0755413	0	114	402	circular	2020-07-31								IncFII(K)_1, CP000648, |IncFIB(K)_1, JN233704,	IncF RST(K2:A-:B-):FIA(-);FIB(-);FIC(-);FII(-);FIIK(2);FIIS(-);FIIY(-)	181928	52.9407	Klebsiella pneumoniae	Klebsiella pneumoniae (573)	Klebsiella (570)	Enterobacteriaceae (543)	Enterobacterales (91347)	Gammaproteobacteria (1236)	Proteobacteria (1224)	Bacteria (2)	6.03251	7.8972
NZ_CP027037.1	0.0755413	0	114	403	circular	2018-12-06	Greece: Athens		38.03	23.79	stool	Homo sapiens		IncFII(K)_1, CP000648, |IncFIB(K)_1, JN233704,	IncF RST(K1:A-:B-):FIA(-);FIB(-);FIC(-);FII(-);FIIK(1);FIIS(-);FIIY(-)	187670	52.5625	Klebsiella pneumoniae	Klebsiella pneumoniae (573)	Klebsiella (570)	Enterobacteriaceae (543)	Enterobacterales (91347)	Gammaproteobacteria (1236)	Proteobacteria (1224)	Bacteria (2)	6.08616	7.89202
NZ_AP022158.1	0.0759181	0	113	404	circular	2020-08-13	Japan:Tokyo		35.6538	139.513				IncFIB(K)_1, JN233704, |IncFII(pKP91)_1, CP000966, |Col(pHAD28)_1, KU674895,	IncF RST(K9:A-:B-):FIA(-);FIB(-);FIC(-);FII(-);FIIK(9);FIIS(-);FIIY(-)	242118	51.5579	Klebsiella pneumoniae	Klebsiella pneumoniae (573)	Klebsiella (570)	Enterobacteriaceae (543)	Enterobacterales (91347)	Gammaproteobacteria (1236)	Proteobacteria (1224)	Bacteria (2)	5.60135	8.63407
NZ_KY271404.1	0.0759181	0	113	405	circular	2020-06-03								IncFII(K)_1, CP000648, |IncFIB(K)_1, JN233704,	IncF RST(K7:A-:B-):FIA(-);FIB(-);FIC(-);FII(-);FIIK(7);FIIS(-);FIIY(-)	227989	52.2109	Klebsiella pneumoniae	Klebsiella pneumoniae (573)	Klebsiella (570)	Enterobacteriaceae (543)	Enterobacterales (91347)	Gammaproteobacteria (1236)	Proteobacteria (1224)	Bacteria (2)	17.8027	16.0523
NZ_CP054775.1	0.0759181	0	113	406	circular	2020-06-18	China: Hunan		27.69	111.66	bed sheets			repB_KLEB_VIR, AP006726, |IncHI1B(pNDM-MAR)_1, JN420336,	IncHI1 MLST(-):HCM1_043(-);HCM1_064(-);HCM1_099(-);HCM1_116(-);HCM1_178ac(-);HCM1_259(-);(-)	195030	50.3917	Klebsiella pneumoniae	Klebsiella pneumoniae (573)	Klebsiella (570)	Enterobacteriaceae (543)	Enterobacterales (91347)	Gammaproteobacteria (1236)	Proteobacteria (1224)	Bacteria (2)	4.8012	8.71734
NZ_CP054769.1	0.0759181	0	113	407	circular	2020-06-18	China: Hunan		27.69	111.66	sputum	Homo sapiens		repB_KLEB_VIR, AP006726, |IncHI1B(pNDM-MAR)_1, JN420336,	IncHI1 MLST(-):HCM1_043(-);HCM1_064(-);HCM1_099(-);HCM1_116(-);HCM1_178ac(-);HCM1_259(-);(-)	195034	50.3897	Klebsiella pneumoniae	Klebsiella pneumoniae (573)	Klebsiella (570)	Enterobacteriaceae (543)	Enterobacterales (91347)	Gammaproteobacteria (1236)	Proteobacteria (1224)	Bacteria (2)	4.80477	8.71813
NZ_CP054757.1	0.0759181	0	113	408	circular	2020-06-18	China: Hunan		27.72	112	sputum	Homo sapiens		repB_KLEB_VIR, AP006726, |IncHI1B(pNDM-MAR)_1, JN420336,	IncHI1 MLST(-):HCM1_043(-);HCM1_064(-);HCM1_099(-);HCM1_116(-);HCM1_178ac(-);HCM1_259(-);(-)	195024	50.3902	Klebsiella pneumoniae	Klebsiella pneumoniae (573)	Klebsiella (570)	Enterobacteriaceae (543)	Enterobacterales (91347)	Gammaproteobacteria (1236)	Proteobacteria (1224)	Bacteria (2)	4.80953	8.70316
NZ_CP054721.1	0.0759181	0	113	409	circular	2020-06-18	China: Hunan		27.72	112	telephone of Nurse station			repB_KLEB_VIR, AP006726, |IncHI1B(pNDM-MAR)_1, JN420336,	IncHI1 MLST(-):HCM1_043(-);HCM1_064(-);HCM1_099(-);HCM1_116(-);HCM1_178ac(-);HCM1_259(-);(-)	194901	50.3871	Klebsiella pneumoniae	Klebsiella pneumoniae (573)	Klebsiella (570)	Enterobacteriaceae (543)	Enterobacterales (91347)	Gammaproteobacteria (1236)	Proteobacteria (1224)	Bacteria (2)	4.79842	8.72451
NZ_CP054739.1	0.0759181	0	113	410	circular	2020-06-18	China: Hunan		27.72	112	monitor panel			repB_KLEB_VIR, AP006726, |IncHI1B(pNDM-MAR)_1, JN420336,	IncHI1 MLST(-):HCM1_043(-);HCM1_064(-);HCM1_099(-);HCM1_116(-);HCM1_178ac(-);HCM1_259(-);(-)	195034	50.3912	Klebsiella pneumoniae	Klebsiella pneumoniae (573)	Klebsiella (570)	Enterobacteriaceae (543)	Enterobacterales (91347)	Gammaproteobacteria (1236)	Proteobacteria (1224)	Bacteria (2)	4.80365	8.72114
NZ_CP054727.1	0.0759181	0	113	411	circular	2020-06-18	China: Hunan		27.72	112	sputum	Homo sapiens		repB_KLEB_VIR, AP006726, |IncHI1B(pNDM-MAR)_1, JN420336,	IncHI1 MLST(-):HCM1_043(-);HCM1_064(-);HCM1_099(-);HCM1_116(-);HCM1_178ac(-);HCM1_259(-);(-)	195027	50.3915	Klebsiella pneumoniae	Klebsiella pneumoniae (573)	Klebsiella (570)	Enterobacteriaceae (543)	Enterobacterales (91347)	Gammaproteobacteria (1236)	Proteobacteria (1224)	Bacteria (2)	4.80195	8.72216
NZ_CP054745.1	0.0759181	0	113	412	circular	2020-06-18	China: Hunan		27.72	112	ventilator			repB_KLEB_VIR, AP006726, |IncHI1B(pNDM-MAR)_1, JN420336,	IncHI1 MLST(-):HCM1_043(-);HCM1_064(-);HCM1_099(-);HCM1_116(-);HCM1_178ac(-);HCM1_259(-);(-)	195025	50.39	Klebsiella pneumoniae	Klebsiella pneumoniae (573)	Klebsiella (570)	Enterobacteriaceae (543)	Enterobacterales (91347)	Gammaproteobacteria (1236)	Proteobacteria (1224)	Bacteria (2)	4.80174	8.72343
NZ_CP054763.1	0.0759181	0	113	413	circular	2020-06-18	China: Hunan		27.69	111.66	sputum	Homo sapiens		repB_KLEB_VIR, AP006726, |IncHI1B(pNDM-MAR)_1, JN420336,	IncHI1 MLST(-):HCM1_043(-);HCM1_064(-);HCM1_099(-);HCM1_116(-);HCM1_178ac(-);HCM1_259(-);(-)	195077	50.3965	Klebsiella pneumoniae	Klebsiella pneumoniae (573)	Klebsiella (570)	Enterobacteriaceae (543)	Enterobacterales (91347)	Gammaproteobacteria (1236)	Proteobacteria (1224)	Bacteria (2)	4.80524	8.71409
NZ_CP054751.1	0.0759181	0	113	414	circular	2020-06-18	China: Hunan		27.72	112	bed sheets	Homo sapiens		repB_KLEB_VIR, AP006726, |IncHI1B(pNDM-MAR)_1, JN420336,	IncHI1 MLST(-):HCM1_043(-);HCM1_064(-);HCM1_099(-);HCM1_116(-);HCM1_178ac(-);HCM1_259(-);(-)	195028	50.3917	Klebsiella pneumoniae	Klebsiella pneumoniae (573)	Klebsiella (570)	Enterobacteriaceae (543)	Enterobacterales (91347)	Gammaproteobacteria (1236)	Proteobacteria (1224)	Bacteria (2)	4.80536	8.7215
NZ_CP054781.1	0.0759181	0	113	415	circular	2020-06-18	China: Hunan		27.69	111.66	sputum	Homo sapiens		repB_KLEB_VIR, AP006726, |IncHI1B(pNDM-MAR)_1, JN420336,	IncHI1 MLST(-):HCM1_043(-);HCM1_064(-);HCM1_099(-);HCM1_116(-);HCM1_178ac(-);HCM1_259(-);(-)	195031	50.3899	Klebsiella pneumoniae	Klebsiella pneumoniae (573)	Klebsiella (570)	Enterobacteriaceae (543)	Enterobacterales (91347)	Gammaproteobacteria (1236)	Proteobacteria (1224)	Bacteria (2)	4.80527	8.72049
NZ_CP024516.1	0.0759181	0	113	416	circular	2017-11-09								IncFIB(K)_1, JN233704, |IncFII(K)_1, CP000648,	IncF RST(K7:A-:B-):FIA(-);FIB(-);FIC(-);FII(-);FIIK(7);FIIS(-);FIIY(-)	227807	52.264	Klebsiella pneumoniae	Klebsiella pneumoniae (573)	Klebsiella (570)	Enterobacteriaceae (543)	Enterobacterales (91347)	Gammaproteobacteria (1236)	Proteobacteria (1224)	Bacteria (2)	17.8766	16.117
NZ_CP008930.1	0.0759181	0	113	417	circular	2015-01-21	Nepal		27.4	85.19	blood	Homo sapiens		IncFII(K)_1, CP000648, |IncFIB(K)_1, JN233704,	IncF RST(K1:A-:B-):FIA(-);FIB(-);FIC(-);FII(-);FIIK(1);FIIS(-);FIIY(-)	187571	52.4633	Klebsiella pneumoniae	Klebsiella pneumoniae (573)	Klebsiella (570)	Enterobacteriaceae (543)	Enterobacterales (91347)	Gammaproteobacteria (1236)	Proteobacteria (1224)	Bacteria (2)	6.02217	7.8967
NZ_CP056426.1	0.0759181	0	113	418	circular	2020-08-03	United Kingdom	United Kingdom	54.7024	-3.27658	Wastewater influent sample		culture	IncFIB(K)_1, JN233704, |IncFII(K)_1, CP000648,	IncF RST(K15:A-:B-):FIA(-);FIB(-);FIC(-);FII(-);FIIK(15);FIIS(-);FIIY(-)	220501	52.2574	Klebsiella pneumoniae	Klebsiella pneumoniae (573)	Klebsiella (570)	Enterobacteriaceae (543)	Enterobacterales (91347)	Gammaproteobacteria (1236)	Proteobacteria (1224)	Bacteria (2)	5.65867	7.25216
NZ_MN310374.1	0.0759181	0	113	419	circular	2020-08-04								IncFIB(K)_1, JN233704,	IncF RST(F-:A-:B-):FIA(-);FIB(-);FIC(-);FII(-);FIIK(-);FIIS(-);FIIY(-)	128170	51.8795	Klebsiella pneumoniae	Klebsiella pneumoniae (573)	Klebsiella (570)	Enterobacteriaceae (543)	Enterobacterales (91347)	Gammaproteobacteria (1236)	Proteobacteria (1224)	Bacteria (2)	5.61673	8.52823
NZ_CP054733.1	0.0762985	0	112	420	circular	2020-06-18	China: Hunan		27.72	112	sputum	Homo sapiens		repB_KLEB_VIR, AP006726, |IncHI1B(pNDM-MAR)_1, JN420336,	IncHI1 MLST(-):HCM1_043(-);HCM1_064(-);HCM1_099(-);HCM1_116(-);HCM1_178ac(-);HCM1_259(-);(-)	194896	50.3858	Klebsiella pneumoniae	Klebsiella pneumoniae (573)	Klebsiella (570)	Enterobacteriaceae (543)	Enterobacterales (91347)	Gammaproteobacteria (1236)	Proteobacteria (1224)	Bacteria (2)	4.84057	8.67818
NZ_CP024483.1	0.0762985	0	112	421	circular	2017-11-08								IncFIB(K)_1, JN233704, |IncFII(K)_1, CP000648,	IncF RST(K7:A-:B-):FIA(-);FIB(-);FIC(-);FII(-);FIIK(7);FIIS(-);FIIY(-)	243634	52.4935	Klebsiella pneumoniae	Klebsiella pneumoniae (573)	Klebsiella (570)	Enterobacteriaceae (543)	Enterobacterales (91347)	Gammaproteobacteria (1236)	Proteobacteria (1224)	Bacteria (2)	17.9673	15.9922
NZ_CP055452.1	0.0762985	0	112	422	circular	2020-08-03	United Kingdom	United Kingdom	54.7024	-3.27658	Freshwater sample from downstream of wastewater treatment plant		culture	IncFIB(K)_1, JN233704, |IncFII(K)_1, CP000648,	IncF RST(K21:A-:B-):FIA(-);FIB(-);FIC(-);FII(-);FIIK(21);FIIS(-);FIIY(-)	244871	52.7821	Klebsiella pneumoniae	Klebsiella pneumoniae (573)	Klebsiella (570)	Enterobacteriaceae (543)	Enterobacterales (91347)	Gammaproteobacteria (1236)	Proteobacteria (1224)	Bacteria (2)	5.66083	7.26468
CP052208.1	0.0762985	0	112	423	circular	2020-05-04	South Korea: Jeonnam		34.87	126.99	blood	Homo sapiens		IncFIB(pNDM-Mar)_1, JN420336,	IncF RST(F-:A-:B-):FIA(-);FIB(-);FIC(-);FII(-);FIIK(-);FIIS(-);FIIY(-)	244221	46.064	Klebsiella pneumoniae	Klebsiella pneumoniae (573)	Klebsiella (570)	Enterobacteriaceae (543)	Enterobacterales (91347)	Gammaproteobacteria (1236)	Proteobacteria (1224)	Bacteria (2)	15.6417	-0.0874339
LR890680.1	0.0762985	0	112	424	circular	2020-10-30								IncFIB(K)_1, JN233704, |IncFII(K)_1, CP000648,	IncF RST(K7:A-:B-):FIA(-);FIB(-);FIC(-);FII(-);FIIK(7);FIIS(-);FIIY(-)	243460	52.4928	Klebsiella pneumoniae	Klebsiella pneumoniae (573)	Klebsiella (570)	Enterobacteriaceae (543)	Enterobacterales (91347)	Gammaproteobacteria (1236)	Proteobacteria (1224)	Bacteria (2)	17.9405	16.0441
LR890649.1	0.0762985	0	112	425	circular	2020-10-30								IncFIB(K)(pCAV1099-114)_1, CP011596,	IncF RST(F-:A-:B-):FIA(-);FIB(-);FIC(-);FII(-);FIIK(-);FIIS(-);FIIY(-)	195420	51.4047	Klebsiella pneumoniae	Klebsiella pneumoniae (573)	Klebsiella (570)	Enterobacteriaceae (543)	Enterobacterales (91347)	Gammaproteobacteria (1236)	Proteobacteria (1224)	Bacteria (2)	5.20654	7.87624
NZ_CP025212.1	0.0762985	0	112	426	circular	2019-04-03	China: Hangzhou		30.26	120.19	blie	Homo sapiens		IncFIB(K)_1, JN233704,	IncF RST(F-:A-:B-):FIA(-);FIB(-);FIC(-);FII(-);FIIK(-);FIIS(-);FIIY(-)	145759	52.2499	Klebsiella pneumoniae	Klebsiella pneumoniae (573)	Klebsiella (570)	Enterobacteriaceae (543)	Enterobacterales (91347)	Gammaproteobacteria (1236)	Proteobacteria (1224)	Bacteria (2)	5.69406	8.23025
NZ_MN310373.1	0.0762985	0	112	427	circular	2020-08-04								IncFIB(K)_1, JN233704,	IncF RST(F-:A-:B-):FIA(-);FIB(-);FIC(-);FII(-);FIIK(-);FIIS(-);FIIY(-)	139389	51.9266	Klebsiella pneumoniae	Klebsiella pneumoniae (573)	Klebsiella (570)	Enterobacteriaceae (543)	Enterobacterales (91347)	Gammaproteobacteria (1236)	Proteobacteria (1224)	Bacteria (2)	5.62239	8.58731
NZ_CP064247.1	0.0766828	0	111	428	circular	2020-11-12	China:Nanchang	China,Nanchang	28.6793	115.889		Homo sapiens	whole organism	Col(pHAD28)_1, KU674895, |IncFIB(K)_1, JN233704, |IncFII(pKP91)_1, CP000966,	IncF RST(K9:A-:B-):FIA(-);FIB(-);FIC(-);FII(-);FIIK(9);FIIS(-);FIIY(-)	272092	51.8376	Klebsiella pneumoniae	Klebsiella pneumoniae (573)	Klebsiella (570)	Enterobacteriaceae (543)	Enterobacterales (91347)	Gammaproteobacteria (1236)	Proteobacteria (1224)	Bacteria (2)	5.62408	8.66785
NC_019390.1	0.0766828	0	111	429	circular	2012-11-13								IncFIB(K)_1, JN233704, |IncFII(K)_1, CP000648,	IncF RST(K8:A-:B-):FIA(-);FIB(-);FIC(-);FII(-);FIIK(8);FIIS(-);FIIY(-)	207819	53.3849	Klebsiella pneumoniae	Klebsiella pneumoniae (573)	Klebsiella (570)	Enterobacteriaceae (543)	Enterobacterales (91347)	Gammaproteobacteria (1236)	Proteobacteria (1224)	Bacteria (2)	5.86771	7.85178
CP052499.1	0.0766828	0	111	430	circular	2020-05-04	South Korea: Gyeonggi		37.66	126.77	blood	Homo sapiens		IncFIB(K)_1, JN233704, |IncFII(K)_1, CP000648,	IncF RST(K7:A-:B-):FIA(-);FIB(-);FIC(-);FII(-);FIIK(7);FIIS(-);FIIY(-)	233093	52.4773	Klebsiella pneumoniae	Klebsiella pneumoniae (573)	Klebsiella (570)	Enterobacteriaceae (543)	Enterobacterales (91347)	Gammaproteobacteria (1236)	Proteobacteria (1224)	Bacteria (2)	17.8499	15.9482
NZ_CP034124.1	0.0766828	0	111	431	circular	2018-12-04	China: zhejiang		30.17	120.09	respiratory tract	Homo sapiens		repB_KLEB_VIR, AP006726, |IncHI1B(pNDM-MAR)_1, JN420336,	IncHI1 MLST(-):HCM1_043(-);HCM1_064(-);HCM1_099(-);HCM1_116(-);HCM1_178ac(-);HCM1_259(-);(-)	200216	50.1963	Klebsiella pneumoniae	Klebsiella pneumoniae (573)	Klebsiella (570)	Enterobacteriaceae (543)	Enterobacterales (91347)	Gammaproteobacteria (1236)	Proteobacteria (1224)	Bacteria (2)	4.80195	8.71424
CP052534.1	0.0766828	0	111	432	circular	2020-05-04	South Korea: Gyeonggi		37.66	126.77	blood	Homo sapiens		IncFIB(K)_1, JN233704, |Col(pHAD28)_1, KU674895, |IncFII(pKP91)_1, CP000966,	IncF RST(K9:A-:B-):FIA(-);FIB(-);FIC(-);FII(-);FIIK(9);FIIS(-);FIIY(-)	256604	51.7689	Klebsiella pneumoniae	Klebsiella pneumoniae (573)	Klebsiella (570)	Enterobacteriaceae (543)	Enterobacterales (91347)	Gammaproteobacteria (1236)	Proteobacteria (1224)	Bacteria (2)	5.62187	8.66637
CP052441.1	0.0766828	0	111	433	circular	2020-05-04	South Korea: Gangwon		37.82	128.16	blood	Homo sapiens		IncFIB(K)_1, JN233704, |IncFII(K)_1, CP000648,	IncF RST(K7:A-:B-):FIA(-);FIB(-);FIC(-);FII(-);FIIK(7);FIIS(-);FIIY(-)	241567	52.2907	Klebsiella pneumoniae	Klebsiella pneumoniae (573)	Klebsiella (570)	Enterobacteriaceae (543)	Enterobacterales (91347)	Gammaproteobacteria (1236)	Proteobacteria (1224)	Bacteria (2)	17.8474	16.0832
NZ_CP026151.1	0.0766828	0	111	434	circular	2019-02-01	China: Fujian Province		26.0939	119.313	blood	Homo sapiens		IncFIB(K)_1, JN233704, |IncFII(K)_1, CP000648,	IncF RST(K1:A-:B-):FIA(-);FIB(-);FIC(-);FII(-);FIIK(1);FIIS(-);FIIY(-)	146984	51.6798	Klebsiella pneumoniae	Klebsiella pneumoniae (573)	Klebsiella (570)	Enterobacteriaceae (543)	Enterobacterales (91347)	Gammaproteobacteria (1236)	Proteobacteria (1224)	Bacteria (2)	6.07809	7.88738
CP052282.1	0.0766828	0	111	435	circular	2020-05-04	South Korea: Jeonnam		34.87	126.99	blood	Homo sapiens		IncFIB(K)_1, JN233704,	IncF RST(F-:A-:B-):FIA(-);FIB(-);FIC(-);FII(-);FIIK(-);FIIS(-);FIIY(-)	100806	50.9533	Klebsiella pneumoniae	Klebsiella pneumoniae (573)	Klebsiella (570)	Enterobacteriaceae (543)	Enterobacterales (91347)	Gammaproteobacteria (1236)	Proteobacteria (1224)	Bacteria (2)	5.57387	8.38677
CP056669.1	0.0766828	0	111	436	circular	2020-07-27	United Kingdom	United Kingdom	54.7024	-3.27658	Wastewater effluent sample		culture	IncFIB(K)_1, JN233704, |IncFII(K)_1, CP000648,	IncF RST(K5:A-:B-):FIA(-);FIB(-);FIC(-);FII(-);FIIK(5);FIIS(-);FIIY(-)	229743	52.3028	Klebsiella oxytoca	Klebsiella oxytoca (571)	Klebsiella (570)	Enterobacteriaceae (543)	Enterobacterales (91347)	Gammaproteobacteria (1236)	Proteobacteria (1224)	Bacteria (2)	5.71249	7.27317
LR890205.1	0.0766828	0	111	437	circular	2020-10-30	Australia: Melbourne		-37.8457	144.982	BAL	Homo sapiens		IncFIB(K)_1, JN233704, |IncFII(K)_1, CP000648,	IncF RST(K7:A-:B-):FIA(-);FIB(-);FIC(-);FII(-);FIIK(7);FIIS(-);FIIY(-)	259454	52.3426	Klebsiella pneumoniae	Klebsiella pneumoniae (573)	Klebsiella (570)	Enterobacteriaceae (543)	Enterobacterales (91347)	Gammaproteobacteria (1236)	Proteobacteria (1224)	Bacteria (2)	17.8115	16.0675
LR890401.1	0.0766828	0	111	438	circular	2020-10-30								IncFIB(K)_1, JN233704, |IncFII(K)_1, CP000648,	IncF RST(K7:A-:B-):FIA(-);FIB(-);FIC(-);FII(-);FIIK(7);FIIS(-);FIIY(-)	243534	52.4851	Klebsiella pneumoniae	Klebsiella pneumoniae (573)	Klebsiella (570)	Enterobacteriaceae (543)	Enterobacterales (91347)	Gammaproteobacteria (1236)	Proteobacteria (1224)	Bacteria (2)	17.8646	16.1154
LR890370.1	0.0766828	0	111	439	circular	2020-10-30								IncFIB(K)_1, JN233704, |IncFII(K)_1, CP000648,	IncF RST(K7:A-:B-):FIA(-);FIB(-);FIC(-);FII(-);FIIK(7);FIIS(-);FIIY(-)	234772	52.4108	Klebsiella pneumoniae	Klebsiella pneumoniae (573)	Klebsiella (570)	Enterobacteriaceae (543)	Enterobacterales (91347)	Gammaproteobacteria (1236)	Proteobacteria (1224)	Bacteria (2)	17.9389	16.2629
LR890344.1	0.0766828	0	111	440	circular	2020-10-30								IncFIB(K)_1, JN233704, |IncFII(K)_1, CP000648,	IncF RST(K7:A-:B-):FIA(-);FIB(-);FIC(-);FII(-);FIIK(7);FIIS(-);FIIY(-)	260491	52.4118	Klebsiella pneumoniae	Klebsiella pneumoniae (573)	Klebsiella (570)	Enterobacteriaceae (543)	Enterobacterales (91347)	Gammaproteobacteria (1236)	Proteobacteria (1224)	Bacteria (2)	17.8686	16.0269
NZ_CP034326.1	0.0766828	0	111	441	circular	2018-12-14	China	China	34.4118	86.0327	blood		Blood sample	IncFIB(K)_1, JN233704, |Col(pHAD28)_1, KU674895, |IncFII(pKP91)_1, CP000966,	IncF RST(K9:A-:B-):FIA(-);FIB(-);FIC(-);FII(-);FIIK(9);FIIS(-);FIIY(-)	253705	51.6813	Klebsiella pneumoniae	Klebsiella pneumoniae (573)	Klebsiella (570)	Enterobacteriaceae (543)	Enterobacterales (91347)	Gammaproteobacteria (1236)	Proteobacteria (1224)	Bacteria (2)	5.61883	8.65562
NZ_CP040176.1	0.0766828	0	111	442	circular	2019-05-20	China: Chongqin	China,Chongqin	43.7987	125.39		Homo sapiens	whole organism	Col(pHAD28)_1, KU674895, |IncFIB(K)_1, JN233704, |IncFII(pKP91)_1, CP000966,	IncF RST(K9:A-:B-):FIA(-);FIB(-);FIC(-);FII(-);FIIK(9);FIIS(-);FIIY(-)	247125	51.8329	Klebsiella pneumoniae	Klebsiella pneumoniae (573)	Klebsiella (570)	Enterobacteriaceae (543)	Enterobacterales (91347)	Gammaproteobacteria (1236)	Proteobacteria (1224)	Bacteria (2)	5.62486	8.6488
CP052570.1	0.0766828	0	111	443	circular	2020-05-04	South Korea: Seoul		37.57	126.98	blood	Homo sapiens		IncFIB(K)_1, JN233704, |Col(pHAD28)_1, KU674895, |IncFII(pKP91)_1, CP000966,	IncF RST(K9:A-:B-):FIA(-);FIB(-);FIC(-);FII(-);FIIK(9);FIIS(-);FIIY(-)	264923	51.7607	Klebsiella pneumoniae	Klebsiella pneumoniae (573)	Klebsiella (570)	Enterobacteriaceae (543)	Enterobacterales (91347)	Gammaproteobacteria (1236)	Proteobacteria (1224)	Bacteria (2)	5.6219	8.65933
CP064298.1	0.0770708	0	110	444	circular	2020-11-15	Colombia: Bogota		4.696	-74.035	Ascites fluid	Homo sapiens		IncFIB(K)_1, JN233704,	IncF RST(F-:A-:B-):FIA(-);FIB(-);FIC(-);FII(-);FIIK(-);FIIS(-);FIIY(-)	124915	51.3773	Klebsiella pneumoniae	Klebsiella pneumoniae (573)	Klebsiella (570)	Enterobacteriaceae (543)	Enterobacterales (91347)	Gammaproteobacteria (1236)	Proteobacteria (1224)	Bacteria (2)	5.65898	8.17159
CP052243.1	0.0770708	0	110	445	circular	2020-05-04	South Korea: Jeonnam		34.87	126.99	blood	Homo sapiens		IncFIB(K)_1, JN233704, |IncFII(K)_1, CP000648,	IncF RST(K7:A-:B-):FIA(-);FIB(-);FIC(-);FII(-);FIIK(7);FIIS(-);FIIY(-)	246731	52.524	Klebsiella pneumoniae	Klebsiella pneumoniae (573)	Klebsiella (570)	Enterobacteriaceae (543)	Enterobacterales (91347)	Gammaproteobacteria (1236)	Proteobacteria (1224)	Bacteria (2)	17.863	15.9665
NZ_CP024500.1	0.0770708	0	110	446	circular	2017-11-08								IncFIB(K)_1, JN233704, |IncFII(K)_1, CP000648,	IncF RST(K7:A-:B-):FIA(-);FIB(-);FIC(-);FII(-);FIIK(7);FIIS(-);FIIY(-)	243620	52.4887	Klebsiella pneumoniae	Klebsiella pneumoniae (573)	Klebsiella (570)	Enterobacteriaceae (543)	Enterobacterales (91347)	Gammaproteobacteria (1236)	Proteobacteria (1224)	Bacteria (2)	17.9668	16.0644
NZ_CP026186.1	0.0770708	0	110	447	circular	2018-01-31	USA		38.9847	-77.0947				IncFIB(pNDM-Mar)_1, JN420336,	IncF RST(F-:A-:B-):FIA(-);FIB(-);FIC(-);FII(-);FIIK(-);FIIS(-);FIIY(-)	373179	48.0322	Klebsiella pneumoniae	Klebsiella pneumoniae (573)	Klebsiella (570)	Enterobacteriaceae (543)	Enterobacterales (91347)	Gammaproteobacteria (1236)	Proteobacteria (1224)	Bacteria (2)	15.6375	-0.075765
LR890203.1	0.0770708	0	110	448	circular	2020-10-30								IncFIB(K)_1, JN233704, |IncFII(K)_1, CP000648,	IncF RST(K7:A-:B-):FIA(-);FIB(-);FIC(-);FII(-);FIIK(7);FIIS(-);FIIY(-)	237123	52.6115	Klebsiella pneumoniae	Klebsiella pneumoniae (573)	Klebsiella (570)	Enterobacteriaceae (543)	Enterobacterales (91347)	Gammaproteobacteria (1236)	Proteobacteria (1224)	Bacteria (2)	17.8705	16.0199
LR890191.1	0.0770708	0	110	449	circular	2020-10-30								IncFIB(K)_1, JN233704, |IncFII(K)_1, CP000648,	IncF RST(K7:A-:B-):FIA(-);FIB(-);FIC(-);FII(-);FIIK(7);FIIS(-);FIIY(-)	245649	52.4834	Klebsiella pneumoniae	Klebsiella pneumoniae (573)	Klebsiella (570)	Enterobacteriaceae (543)	Enterobacterales (91347)	Gammaproteobacteria (1236)	Proteobacteria (1224)	Bacteria (2)	17.8612	16.0652
LR890392.1	0.0770708	0	110	450	circular	2020-10-30								IncFIB(K)_1, JN233704, |IncFII(K)_1, CP000648,	IncF RST(K7:A-:B-):FIA(-);FIB(-);FIC(-);FII(-);FIIK(7);FIIS(-);FIIY(-)	244845	52.4944	Klebsiella pneumoniae	Klebsiella pneumoniae (573)	Klebsiella (570)	Enterobacteriaceae (543)	Enterobacterales (91347)	Gammaproteobacteria (1236)	Proteobacteria (1224)	Bacteria (2)	17.8974	16.157
LR890385.1	0.0770708	0	110	451	circular	2020-10-30	Australia: Melbourne		-37.8457	144.982	sputum	Homo sapiens		IncFIB(K)_1, JN233704, |IncFII(K)_1, CP000648,	IncF RST(K7:A-:B-):FIA(-);FIB(-);FIC(-);FII(-);FIIK(7);FIIS(-);FIIY(-)	244759	52.4908	Klebsiella pneumoniae	Klebsiella pneumoniae (573)	Klebsiella (570)	Enterobacteriaceae (543)	Enterobacterales (91347)	Gammaproteobacteria (1236)	Proteobacteria (1224)	Bacteria (2)	17.8255	16.1271
LR890361.1	0.0770708	0	110	452	circular	2020-10-30								IncFIB(K)_1, JN233704, |IncFII(K)_1, CP000648,	IncF RST(K5:A-:B-):FIA(-);FIB(-);FIC(-);FII(-);FIIK(5);FIIS(-);FIIY(-)	233670	52.2789	Klebsiella pneumoniae	Klebsiella pneumoniae (573)	Klebsiella (570)	Enterobacteriaceae (543)	Enterobacterales (91347)	Gammaproteobacteria (1236)	Proteobacteria (1224)	Bacteria (2)	17.8719	16.2854
LR890231.1	0.0770708	0	110	453	circular	2020-10-30	Australia: Melbourne		-37.8457	144.982	rectal swab	Homo sapiens		IncFIB(K)_1, JN233704, |IncFII(K)_1, CP000648,	IncF RST(K7:A-:B-):FIA(-);FIB(-);FIC(-);FII(-);FIIK(7);FIIS(-);FIIY(-)	244844	52.4942	Klebsiella pneumoniae	Klebsiella pneumoniae (573)	Klebsiella (570)	Enterobacteriaceae (543)	Enterobacterales (91347)	Gammaproteobacteria (1236)	Proteobacteria (1224)	Bacteria (2)	17.8655	16.0522
NZ_CP018693.1	0.0770708	0	110	454	circular	2016-12-20	Germany: Goettingen		51.5392	9.91156	anal swab	Homo sapiens		IncFII(K)_1, CP000648, |IncFIB(K)_1, JN233704,	IncF RST(K1:A-:B-):FIA(-);FIB(-);FIC(-);FII(-);FIIK(1);FIIS(-);FIIY(-)	180027	52.0777	Klebsiella pneumoniae	Klebsiella pneumoniae (573)	Klebsiella (570)	Enterobacteriaceae (543)	Enterobacterales (91347)	Gammaproteobacteria (1236)	Proteobacteria (1224)	Bacteria (2)	6.08206	7.86547
NZ_CP018441.1	0.0770708	0	110	455	circular	2016-12-19	Germany: Goettingen		51.5392	9.91156	skin swab	Homo sapiens		IncFII(K)_1, CP000648, |IncFIB(K)_1, JN233704,	IncF RST(K1:A-:B-):FIA(-);FIB(-);FIC(-);FII(-);FIIK(1);FIIS(-);FIIY(-)	180027	52.0777	Klebsiella pneumoniae	Klebsiella pneumoniae (573)	Klebsiella (570)	Enterobacteriaceae (543)	Enterobacterales (91347)	Gammaproteobacteria (1236)	Proteobacteria (1224)	Bacteria (2)	6.08748	7.87463
CP052485.1	0.0770708	0	110	456	circular	2020-05-04	South Korea: Gangwon		37.82	128.16	blood	Homo sapiens		IncFIB(K)_1, JN233704,	IncF RST(F-:A-:B-):FIA(-);FIB(-);FIC(-);FII(-);FIIK(-);FIIS(-);FIIY(-)	132769	51.613	Klebsiella pneumoniae	Klebsiella pneumoniae (573)	Klebsiella (570)	Enterobacteriaceae (543)	Enterobacterales (91347)	Gammaproteobacteria (1236)	Proteobacteria (1224)	Bacteria (2)	5.67016	8.21448
CP052279.1	0.0774628	0	109	457	circular	2020-05-04	South Korea: Jeonnam		34.87	126.99	blood	Homo sapiens		IncFIB(K)_1, JN233704, |Col(pHAD28)_1, KU674895, |IncFII(pKP91)_1, CP000966,	IncF RST(K9:A-:B-):FIA(-);FIB(-);FIC(-);FII(-);FIIK(9);FIIS(-);FIIY(-)	253878	51.5744	Klebsiella pneumoniae	Klebsiella pneumoniae (573)	Klebsiella (570)	Enterobacteriaceae (543)	Enterobacterales (91347)	Gammaproteobacteria (1236)	Proteobacteria (1224)	Bacteria (2)	5.62184	8.66909
CP052140.1	0.0774628	0	109	458	circular	2020-05-04	South Korea: Busan		35.18	129.08	blood	Homo sapiens		IncFIB(K)_1, JN233704,	IncF RST(F-:A-:B-):FIA(-);FIB(-);FIC(-);FII(-);FIIK(-);FIIS(-);FIIY(-)	155408	51.2393	Klebsiella pneumoniae	Klebsiella pneumoniae (573)	Klebsiella (570)	Enterobacteriaceae (543)	Enterobacterales (91347)	Gammaproteobacteria (1236)	Proteobacteria (1224)	Bacteria (2)	5.72565	8.3334
NZ_CP011634.1	0.0774628	0	109	459	circular	2015-06-18	USA:Virginia		38.14	-78.45	Perirectal	Homo sapiens		IncFII(pRSB107)_1, AJ851089, |IncFIA(HI1)_1, AF250878, |IncFII(Yp)_1, CP000670,	IncF RST(F-:A-:B-):FIA(21?);FIB(-);FIC(-);FII(-);FIIK(-);FIIS(-);FIIY(7?)	227680	53.8348	Klebsiella oxytoca	Klebsiella oxytoca (571)	Klebsiella (570)	Enterobacteriaceae (543)	Enterobacterales (91347)	Gammaproteobacteria (1236)	Proteobacteria (1224)	Bacteria (2)	5.44619	7.10486
NZ_CP056531.1	0.0774628	0	109	460	circular	2020-08-03	United Kingdom	United Kingdom	54.7024	-3.27658	Freshwater sample from downstream of wastewater treatment plant		culture	IncFIB(K)_1, JN233704, |IncFII(K)_1, CP000648,	IncF RST(K15:A-:B-):FIA(-);FIB(-);FIC(-);FII(-);FIIK(15);FIIS(-);FIIY(-)	224837	52.3335	Klebsiella pneumoniae	Klebsiella pneumoniae (573)	Klebsiella (570)	Enterobacteriaceae (543)	Enterobacterales (91347)	Gammaproteobacteria (1236)	Proteobacteria (1224)	Bacteria (2)	5.64773	7.27667
LR890218.1	0.0774628	0	109	461	circular	2020-10-30								IncFIB(K)(pCAV1099-114)_1, CP011596,	IncF RST(F-:A-:B-):FIA(-);FIB(-);FIC(-);FII(-);FIIK(-);FIIS(-);FIIY(-)	192965	51.4684	Klebsiella pneumoniae	Klebsiella pneumoniae (573)	Klebsiella (570)	Enterobacteriaceae (543)	Enterobacterales (91347)	Gammaproteobacteria (1236)	Proteobacteria (1224)	Bacteria (2)	5.20106	7.89573
LR890186.1	0.0774628	0	109	462	circular	2020-10-30								IncFIB(K)_1, JN233704, |IncFII(pKP91)_1, CP000966,	IncF RST(K9:A-:B-):FIA(-);FIB(-);FIC(-);FII(-);FIIK(9);FIIS(-);FIIY(-)	239736	52.6179	Klebsiella pneumoniae	Klebsiella pneumoniae (573)	Klebsiella (570)	Enterobacteriaceae (543)	Enterobacterales (91347)	Gammaproteobacteria (1236)	Proteobacteria (1224)	Bacteria (2)	5.80931	7.9421
LR890416.1	0.0774628	0	109	463	circular	2020-10-30								IncFIB(K)_1, JN233704, |IncFII(K)_1, CP000648,	IncF RST(K7:A-:B-):FIA(-);FIB(-);FIC(-);FII(-);FIIK(7);FIIS(-);FIIY(-)	243620	52.4899	Klebsiella pneumoniae	Klebsiella pneumoniae (573)	Klebsiella (570)	Enterobacteriaceae (543)	Enterobacterales (91347)	Gammaproteobacteria (1236)	Proteobacteria (1224)	Bacteria (2)	17.887	16.1364
LR890375.1	0.0774628	0	109	464	circular	2020-10-30								IncFIB(K)_1, JN233704, |IncFII(K)_1, CP000648,	IncF RST(K7:A-:B-):FIA(-);FIB(-);FIC(-);FII(-);FIIK(7);FIIS(-);FIIY(-)	243634	52.4931	Klebsiella pneumoniae	Klebsiella pneumoniae (573)	Klebsiella (570)	Enterobacteriaceae (543)	Enterobacterales (91347)	Gammaproteobacteria (1236)	Proteobacteria (1224)	Bacteria (2)	17.8651	16.1938
LR890692.1	0.0774628	0	109	465	circular	2020-10-30								IncFIB(K)_1, JN233704,	IncF RST(F-:A-:B-):FIA(-);FIB(-);FIC(-);FII(-);FIIK(-);FIIS(-);FIIY(-)	233443	52.7405	Klebsiella pneumoniae	Klebsiella pneumoniae (573)	Klebsiella (570)	Enterobacteriaceae (543)	Enterobacterales (91347)	Gammaproteobacteria (1236)	Proteobacteria (1224)	Bacteria (2)	5.78585	7.76036
LR890617.1	0.0774628	0	109	466	circular	2020-10-30								IncFIB(K)_1, JN233704, |Col(pHAD28)_1, KU674895, |IncFII(pKP91)_1, CP000966,	IncF RST(K9:A-:B-):FIA(-);FIB(-);FIC(-);FII(-);FIIK(9);FIIS(-);FIIY(-)	269043	51.7531	Klebsiella pneumoniae	Klebsiella pneumoniae (573)	Klebsiella (570)	Enterobacteriaceae (543)	Enterobacterales (91347)	Gammaproteobacteria (1236)	Proteobacteria (1224)	Bacteria (2)	5.61576	8.65672
NZ_CP015132.1	0.0774628	0	109	467	circular	2016-06-21	USA		38.9847	-77.0947				IncFII(K)_1, CP000648, |IncFIB(K)_1, JN233704,	IncF RST(K8:A-:B-):FIA(-);FIB(-);FIC(-);FII(-);FIIK(8);FIIS(-);FIIY(-)	224457	52.4835	Klebsiella pneumoniae	Klebsiella pneumoniae (573)	Klebsiella (570)	Enterobacteriaceae (543)	Enterobacterales (91347)	Gammaproteobacteria (1236)	Proteobacteria (1224)	Bacteria (2)	5.95181	7.89876
NZ_CP056298.1	0.0774628	0	109	468	circular	2020-08-03	United Kingdom	United Kingdom	54.7024	-3.27658	Wastewater influent sample		culture	IncFIB(K)_1, JN233704,	IncF RST(F-:A-:B-):FIA(-);FIB(-);FIC(-);FII(-);FIIK(-);FIIS(-);FIIY(-)	131105	51.9042	Klebsiella pneumoniae	Klebsiella pneumoniae (573)	Klebsiella (570)	Enterobacteriaceae (543)	Enterobacterales (91347)	Gammaproteobacteria (1236)	Proteobacteria (1224)	Bacteria (2)	5.4916	7.51912
NZ_CP011977.1	0.0774628	0	109	469	circular	2015-08-13								IncR_1, DQ449578, |IncFIB(K)_1, JN233704, |IncFII(K)_1, CP000648,	IncF RST(K1:A-:B-):FIA(-);FIB(-);FIC(-);FII(-);FIIK(1);FIIS(-);FIIY(-)	218836	52.7633	Klebsiella pneumoniae DMC1097	Klebsiella pneumoniae (573)	Klebsiella (570)	Enterobacteriaceae (543)	Enterobacterales (91347)	Gammaproteobacteria (1236)	Proteobacteria (1224)	Bacteria (2)	6.06294	7.87461
NZ_AP022079.1	0.0774628	0	109	470	circular	2020-08-13	Japan:Tokyo		35.6514	139.481				IncFIB(K)_1, JN233704, |IncFII(K)_1, CP000648,	IncF RST(K15:A-:B-):FIA(-);FIB(-);FIC(-);FII(-);FIIK(15);FIIS(-);FIIY(-)	224088	52.5548	Klebsiella pneumoniae	Klebsiella pneumoniae (573)	Klebsiella (570)	Enterobacteriaceae (543)	Enterobacterales (91347)	Gammaproteobacteria (1236)	Proteobacteria (1224)	Bacteria (2)	5.64245	7.26385
NZ_CP032195.1	0.0774628	0	109	471	circular	2018-09-19	missing				missing	missing		IncFIB(K)_1, JN233704, |IncFII(K)_1, CP000648,	IncF RST(K8:A-:B-):FIA(-);FIB(-);FIC(-);FII(-);FIIK(8);FIIS(-);FIIY(-)	143515	51.2539	Klebsiella pneumoniae	Klebsiella pneumoniae (573)	Klebsiella (570)	Enterobacteriaceae (543)	Enterobacterales (91347)	Gammaproteobacteria (1236)	Proteobacteria (1224)	Bacteria (2)	5.99697	7.74817
NZ_AP021970.1	0.0778587	0	108	472	circular	2020-08-13	Japan:Tokyo		35.6684	139.428				IncFIB(K)_1, JN233704, |IncFII(pKP91)_1, CP000966, |Col(pHAD28)_1, KU674895,	IncF RST(K9:A-:B-):FIA(-);FIB(-);FIC(-);FII(-);FIIK(9);FIIS(-);FIIY(-)	253831	51.6509	Raoultella ornithinolytica	Raoultella ornithinolytica (54291)	Raoultella (160674)	Enterobacteriaceae (543)	Enterobacterales (91347)	Gammaproteobacteria (1236)	Proteobacteria (1224)	Bacteria (2)	5.63391	8.7228
NZ_MG764551.1	0.0778587	0	108	473	circular	2020-06-03								IncFIB(K)_1, JN233704, |Col(pHAD28)_1, KU674895, |IncFII(pKP91)_1, CP000966,	IncF RST(K9:A-:B-):FIA(-);FIB(-);FIC(-);FII(-);FIIK(9);FIIS(-);FIIY(-)	271255	51.8859	Klebsiella pneumoniae	Klebsiella pneumoniae (573)	Klebsiella (570)	Enterobacteriaceae (543)	Enterobacterales (91347)	Gammaproteobacteria (1236)	Proteobacteria (1224)	Bacteria (2)	5.61846	8.67136
CP052337.1	0.0778587	0	108	474	circular	2020-05-04	South Korea: Chungbuk		36.8	127.7	blood	Homo sapiens		IncFIB(K)_1, JN233704, |IncFII(K)_1, CP000648,	IncF RST(K2:A-:B-):FIA(-);FIB(-);FIC(-);FII(-);FIIK(2);FIIS(-);FIIY(-)	233970	52.729	Klebsiella pneumoniae	Klebsiella pneumoniae (573)	Klebsiella (570)	Enterobacteriaceae (543)	Enterobacterales (91347)	Gammaproteobacteria (1236)	Proteobacteria (1224)	Bacteria (2)	5.82657	7.90813
NZ_CP056855.1	0.0778587	0	108	475	circular	2020-08-03	United Kingdom	United Kingdom	54.7024	-3.27658	Freshwater sample from downstream of wastewater treatment plant		culture	IncFIB(K)_1, JN233704, |IncFII(K)_1, CP000648,	IncF RST(K15:A-:B-):FIA(-);FIB(-);FIC(-);FII(-);FIIK(15);FIIS(-);FIIY(-)	188591	52.888	Klebsiella pneumoniae	Klebsiella pneumoniae (573)	Klebsiella (570)	Enterobacteriaceae (543)	Enterobacterales (91347)	Gammaproteobacteria (1236)	Proteobacteria (1224)	Bacteria (2)	5.65266	7.26634
NZ_CP011577.1	0.0778587	0	108	476	circular	2015-06-18	USA:Virginia		38.14	-78.45	sputum	Homo sapiens		IncFII(K)_1, CP000648, |IncFIB(K)_1, JN233704,	IncF RST(K1:A-:B-):FIA(-);FIB(-);FIC(-);FII(-);FIIK(1);FIIS(-);FIIY(-)	130719	51.6543	Klebsiella pneumoniae	Klebsiella pneumoniae (573)	Klebsiella (570)	Enterobacteriaceae (543)	Enterobacterales (91347)	Gammaproteobacteria (1236)	Proteobacteria (1224)	Bacteria (2)	6.05892	7.79319
NZ_MN823997.1	0.0778587	0	108	477	circular	2020-08-04								IncFII(K)_1, CP000648, |IncQ1_1, M28829, |IncFIB(K)_1, JN233704,	IncF RST(K8:A-:B-):FIA(-);FIB(-);FIC(-);FII(-);FIIK(8);FIIS(-);FIIY(-)	194141	52.7014	Klebsiella pneumoniae	Klebsiella pneumoniae (573)	Klebsiella (570)	Enterobacteriaceae (543)	Enterobacterales (91347)	Gammaproteobacteria (1236)	Proteobacteria (1224)	Bacteria (2)	6.01116	7.92861
NZ_CP061405.1	0.0778587	0	108	478	circular	2020-09-11	USA: Chicago, IL		41.8945	-87.6208	unknown	Homo sapiens		IncFII(K)_1, CP000648, |IncFIB(K)_1, JN233704,	IncF RST(K1:A-:B-):FIA(-);FIB(-);FIC(-);FII(-);FIIK(1);FIIS(-);FIIY(-)	162789	52.0809	Klebsiella pneumoniae	Klebsiella pneumoniae (573)	Klebsiella (570)	Enterobacteriaceae (543)	Enterobacterales (91347)	Gammaproteobacteria (1236)	Proteobacteria (1224)	Bacteria (2)	6.09853	7.83533
LR890308.1	0.0778587	0	108	479	circular	2020-10-30								IncFIB(K)_1, JN233704, |Col(pHAD28)_1, KU674895, |IncFII(pKP91)_1, CP000966,	IncF RST(K9:A-:B-):FIA(-);FIB(-);FIC(-);FII(-);FIIK(9);FIIS(-);FIIY(-)	263601	51.633	Klebsiella pneumoniae	Klebsiella pneumoniae (573)	Klebsiella (570)	Enterobacteriaceae (543)	Enterobacterales (91347)	Gammaproteobacteria (1236)	Proteobacteria (1224)	Bacteria (2)	5.61721	8.65082
LR890292.1	0.0778587	0	108	480	circular	2020-10-30	Australia: Melbourne		-37.81	144.96	Rectal swab	Homo sapiens		IncFIB(K)_1, JN233704,	IncF RST(F-:A-:B-):FIA(-);FIB(-);FIC(-);FII(-);FIIK(-);FIIS(-);FIIY(-)	133165	51.8883	Klebsiella pneumoniae	Klebsiella pneumoniae (573)	Klebsiella (570)	Enterobacteriaceae (543)	Enterobacterales (91347)	Gammaproteobacteria (1236)	Proteobacteria (1224)	Bacteria (2)	5.51701	7.47638
LR890671.1	0.0778587	0	108	481	circular	2020-10-30								IncFIB(K)_1, JN233704,	IncF RST(F-:A-:B-):FIA(-);FIB(-);FIC(-);FII(-);FIIK(-);FIIS(-);FIIY(-)	115932	51.6406	Klebsiella pneumoniae	Klebsiella pneumoniae (573)	Klebsiella (570)	Enterobacteriaceae (543)	Enterobacterales (91347)	Gammaproteobacteria (1236)	Proteobacteria (1224)	Bacteria (2)	5.63008	7.28736
NZ_CP048413.1	0.0778587	0	108	482	circular	2020-08-11	China:Qingdao		37.09	121	missing	Equus caballus		Col(pHAD28)_1, KU674895, |IncFII(pKP91)_1, CP000966, |IncFIB(K)_1, JN233704,	IncF RST(K9:A-:B-):FIA(-);FIB(-);FIC(-);FII(-);FIIK(9);FIIS(-);FIIY(-)	265871	51.5637	Klebsiella pneumoniae	Klebsiella pneumoniae (573)	Klebsiella (570)	Enterobacteriaceae (543)	Enterobacterales (91347)	Gammaproteobacteria (1236)	Proteobacteria (1224)	Bacteria (2)	5.60772	8.65121
CP052193.1	0.0778587	0	108	483	circular	2020-05-04	South Korea: Busan		35.18	129.08	blood	Homo sapiens		IncFIB(K)_1, JN233704, |IncFII(pKP91)_1, CP000966,	IncF RST(K9:A-:B-):FIA(-);FIB(-);FIC(-);FII(-);FIIK(9);FIIS(-);FIIY(-)	118472	50.525	Klebsiella pneumoniae	Klebsiella pneumoniae (573)	Klebsiella (570)	Enterobacteriaceae (543)	Enterobacterales (91347)	Gammaproteobacteria (1236)	Proteobacteria (1224)	Bacteria (2)	5.63223	8.34871
CP052408.1	0.0778587	0	108	484	circular	2020-05-04	South Korea: Gangwon		37.82	128.16	blood	Homo sapiens		IncFIB(K)_1, JN233704, |IncFII(K)_1, CP000648,	IncF RST(K1:A-:B-):FIA(-);FIB(-);FIC(-);FII(-);FIIK(1);FIIS(-);FIIY(-)	148793	51.8559	Klebsiella pneumoniae	Klebsiella pneumoniae (573)	Klebsiella (570)	Enterobacteriaceae (543)	Enterobacterales (91347)	Gammaproteobacteria (1236)	Proteobacteria (1224)	Bacteria (2)	6.08408	7.86636
CP052173.1	0.0782587	0	107	485	circular	2020-05-04	South Korea: Busan		35.18	129.08	blood	Homo sapiens		IncFIB(K)_1, JN233704, |Col(pHAD28)_1, KU674895, |IncFII(pKP91)_1, CP000966,	IncF RST(K9:A-:B-):FIA(-);FIB(-);FIC(-);FII(-);FIIK(9);FIIS(-);FIIY(-)	273714	51.8406	Klebsiella pneumoniae	Klebsiella pneumoniae (573)	Klebsiella (570)	Enterobacteriaceae (543)	Enterobacterales (91347)	Gammaproteobacteria (1236)	Proteobacteria (1224)	Bacteria (2)	5.63404	8.678
NZ_CP023943.1	0.0782587	0	107	486	circular	2017-10-20	Canada:BC	Canada,BC	55.0013	-125.002	wound	Homo sapiens		IncFIB(K)_1, JN233704, |IncFII(K)_1, CP000648,	IncF RST(K1:A-:B-):FIA(-);FIB(-);FIC(-);FII(-);FIIK(1);FIIS(-);FIIY(-)	196733	52.1727	Klebsiella pneumoniae	Klebsiella pneumoniae (573)	Klebsiella (570)	Enterobacteriaceae (543)	Enterobacterales (91347)	Gammaproteobacteria (1236)	Proteobacteria (1224)	Bacteria (2)	6.07168	7.88902
NZ_CP042521.1	0.0782587	0	107	487	circular	2019-10-13	Australia: Sydney	Australia,Sydney	-33.8548	151.216	clinical sample	Homo sapiens	Whole organism	IncFIB(K)_1, JN233704, |IncFII(K)_1, CP000648,	IncF RST(K8:A-:B-):FIA(-);FIB(-);FIC(-);FII(-);FIIK(8);FIIS(-);FIIY(-)	169226	51.771	Klebsiella pneumoniae	Klebsiella pneumoniae (573)	Klebsiella (570)	Enterobacteriaceae (543)	Enterobacterales (91347)	Gammaproteobacteria (1236)	Proteobacteria (1224)	Bacteria (2)	5.95619	7.88021
NZ_CP012884.1	0.0782587	0	107	488	circular	2016-01-27								IncFIB(K)_1, JN233704, |IncFII(K)_1, CP000648,	IncF RST(K8:A-:B-):FIA(-);FIB(-);FIC(-);FII(-);FIIK(8);FIIS(-);FIIY(-)	194742	51.9508	Klebsiella pneumoniae KP-1	Klebsiella pneumoniae (573)	Klebsiella (570)	Enterobacteriaceae (543)	Enterobacterales (91347)	Gammaproteobacteria (1236)	Proteobacteria (1224)	Bacteria (2)	5.91451	7.87515
NZ_CP026398.1	0.0782587	0	107	489	circular	2018-02-24	USA		38.9847	-77.0947				IncFIB(pNDM-Mar)_1, JN420336, |IncHI1B(pNDM-MAR)_1, JN420336,	IncF RST(F-:A-:B-):FIA(-);FIB(-);FIC(-);FII(-);FIIK(-);FIIS(-);FIIY(-)|IncHI1 MLST(-):HCM1_043(-);HCM1_064(-);HCM1_099(-);HCM1_116(-);HCM1_178ac(-);HCM1_259(-);(-)	249238	46.5206	Klebsiella pneumoniae	Klebsiella pneumoniae (573)	Klebsiella (570)	Enterobacteriaceae (543)	Enterobacterales (91347)	Gammaproteobacteria (1236)	Proteobacteria (1224)	Bacteria (2)	15.6617	-0.105289
NZ_CP031614.1	0.0782587	0	107	490	circular	2018-09-02	China	China	34.4118	86.0327		pig	whole organism	IncFII(K)_1, CP000648, |IncFIB(K)_1, JN233704,	IncF RST(K5:A-:B-):FIA(-);FIB(-);FIC(-);FII(-);FIIK(5);FIIS(-);FIIY(-)	196414	51.5671	Klebsiella pneumoniae	Klebsiella pneumoniae (573)	Klebsiella (570)	Enterobacteriaceae (543)	Enterobacterales (91347)	Gammaproteobacteria (1236)	Proteobacteria (1224)	Bacteria (2)	6.22562	7.5169
LR890621.1	0.0782587	0	107	491	circular	2020-10-30								IncFIB(K)_1, JN233704, |IncFII(K)_1, CP000648,	IncF RST(K5:A-:B-):FIA(-);FIB(-);FIC(-);FII(-);FIIK(5);FIIS(-);FIIY(-)	230118	52.5509	Klebsiella pneumoniae	Klebsiella pneumoniae (573)	Klebsiella (570)	Enterobacteriaceae (543)	Enterobacterales (91347)	Gammaproteobacteria (1236)	Proteobacteria (1224)	Bacteria (2)	5.65129	7.27358
NZ_MN310376.1	0.0782587	0	107	492	circular	2020-08-04								IncFIB(K)_1, JN233704,	IncF RST(F-:A-:B-):FIA(-);FIB(-);FIC(-);FII(-);FIIK(-);FIIS(-);FIIY(-)	130483	51.6358	Klebsiella pneumoniae	Klebsiella pneumoniae (573)	Klebsiella (570)	Enterobacteriaceae (543)	Enterobacterales (91347)	Gammaproteobacteria (1236)	Proteobacteria (1224)	Bacteria (2)	5.6189	8.56064
NZ_CP021951.1	0.0786628	0	106	493	circular	2017-06-22	missing				missing	missing		IncFII(K)_1, CP000648, |IncFIB(K)_1, JN233704,	IncF RST(K19:A-:B-):FIA(-);FIB(-);FIC(-);FII(-);FIIK(19);FIIS(-);FIIY(-)	181589	51.0835	Klebsiella pneumoniae	Klebsiella pneumoniae (573)	Klebsiella (570)	Enterobacteriaceae (543)	Enterobacterales (91347)	Gammaproteobacteria (1236)	Proteobacteria (1224)	Bacteria (2)	6.27221	7.56579
CP052237.1	0.0786628	0	106	494	circular	2020-05-04	South Korea: Jeonnam		34.87	126.99	blood	Homo sapiens		IncFIB(K)_1, JN233704,	IncF RST(F-:A-:B-):FIA(-);FIB(-);FIC(-);FII(-);FIIK(-);FIIS(-);FIIY(-)	139226	52.0592	Klebsiella pneumoniae	Klebsiella pneumoniae (573)	Klebsiella (570)	Enterobacteriaceae (543)	Enterobacterales (91347)	Gammaproteobacteria (1236)	Proteobacteria (1224)	Bacteria (2)	5.61073	8.15983
NZ_AP022086.1	0.0786628	0	106	495	circular	2020-08-13	Japan:Tokyo		35.6514	139.481				IncQ1_1, M28829, |IncHI1B(pNDM-MAR)_1, JN420336, |IncFIB(pNDM-Mar)_1, JN420336,	IncHI1 MLST(-):HCM1_043(-);HCM1_064(-);HCM1_099(-);HCM1_116(-);HCM1_178ac(-);HCM1_259(-);(-)|IncF RST(F-:A-:B-):FIA(-);FIB(-);FIC(-);FII(-);FIIK(-);FIIS(-);FIIY(-)	281370	47.2147	Klebsiella quasipneumoniae	Klebsiella quasipneumoniae (1463165)	Klebsiella (570)	Enterobacteriaceae (543)	Enterobacterales (91347)	Gammaproteobacteria (1236)	Proteobacteria (1224)	Bacteria (2)	15.5766	-0.153355
NZ_MN182749.1	0.0786628	0	106	496	circular	2020-09-23								repB_KLEB_VIR, AP006726, |IncHI1B(pNDM-MAR)_1, JN420336,	IncHI1 MLST(-):HCM1_043(-);HCM1_064(-);HCM1_099(-);HCM1_116(-);HCM1_178ac(-);HCM1_259(-);(-)	197416	50.042	Klebsiella pneumoniae	Klebsiella pneumoniae (573)	Klebsiella (570)	Enterobacteriaceae (543)	Enterobacterales (91347)	Gammaproteobacteria (1236)	Proteobacteria (1224)	Bacteria (2)	4.80283	8.70891
NZ_CP027044.1	0.0786628	0	106	497	circular	2018-12-06	Greece: Athens		38.03	23.79	stool	Homo sapiens		IncFII(pKP91)_1, CP000966, |IncFIB(K)_1, JN233704,	IncF RST(K4:A-:B-):FIA(-);FIB(-);FIC(-);FII(-);FIIK(4);FIIS(-);FIIY(-)	168873	53.4769	Klebsiella pneumoniae	Klebsiella pneumoniae (573)	Klebsiella (570)	Enterobacteriaceae (543)	Enterobacterales (91347)	Gammaproteobacteria (1236)	Proteobacteria (1224)	Bacteria (2)	5.91949	7.94095
NZ_CP049605.1	0.0786628	0	106	498	circular	2020-03-10	USA: Auburn, AL		32.5934	-85.4952	Musca domestica			IncFIB(K)_1, JN233704,	IncF RST(F-:A-:B-):FIA(-);FIB(-);FIC(-);FII(-);FIIK(-);FIIS(-);FIIY(-)	224442	52.373	Klebsiella pneumoniae	Klebsiella pneumoniae (573)	Klebsiella (570)	Enterobacteriaceae (543)	Enterobacterales (91347)	Gammaproteobacteria (1236)	Proteobacteria (1224)	Bacteria (2)	5.78274	8.00364
NZ_CP031935.1	0.0786628	0	106	499	circular	2020-10-07	China	China	34.4118	86.0327		Homo sapiens	missing	IncHI1B(pNDM-MAR)_1, JN420336, |repB_KLEB_VIR, AP006726,	IncHI1 MLST(-):HCM1_043(-);HCM1_064(-);HCM1_099(-);HCM1_116(-);HCM1_178ac(-);HCM1_259(-);(-)	198126	50.106	Klebsiella pneumoniae	Klebsiella pneumoniae (573)	Klebsiella (570)	Enterobacteriaceae (543)	Enterobacterales (91347)	Gammaproteobacteria (1236)	Proteobacteria (1224)	Bacteria (2)	4.80348	8.71246
CP052561.1	0.0786628	0	106	500	circular	2020-05-04	South Korea: Seoul		37.57	126.98	blood	Homo sapiens		IncFIB(K)_1, JN233704,	IncF RST(F-:A-:B-):FIA(-);FIB(-);FIC(-);FII(-);FIIK(-);FIIS(-);FIIY(-)	138127	52.089	Klebsiella pneumoniae	Klebsiella pneumoniae (573)	Klebsiella (570)	Enterobacteriaceae (543)	Enterobacterales (91347)	Gammaproteobacteria (1236)	Proteobacteria (1224)	Bacteria (2)	5.62436	8.22278
NZ_CP026179.1	0.0786628	0	106	501	circular	2018-01-31	USA		38.9847	-77.0947				IncN_1, AY046276, |IncFII(K)_1, CP000648, |IncFIA(HI1)_1, AF250878,	IncN MLST(-):repN(2);traJ(4);korA(-)|IncF RST(K3:A-:B-):FIA(~21);FIB(-);FIC(-);FII(-);FIIK(3);FIIS(-);FIIY(-)	237571	51.4112	Klebsiella pneumoniae	Klebsiella pneumoniae (573)	Klebsiella (570)	Enterobacteriaceae (543)	Enterobacterales (91347)	Gammaproteobacteria (1236)	Proteobacteria (1224)	Bacteria (2)	5.68028	7.24337
LR890565.1	0.0786628	0	106	502	circular	2020-10-30								IncFII(K)_1, CP000648, |IncFIB(K)_1, JN233704,	IncF RST(K7:A-:B-):FIA(-);FIB(-);FIC(-);FII(-);FIIK(7);FIIS(-);FIIY(-)	228690	52.5646	Klebsiella pneumoniae	Klebsiella pneumoniae (573)	Klebsiella (570)	Enterobacteriaceae (543)	Enterobacterales (91347)	Gammaproteobacteria (1236)	Proteobacteria (1224)	Bacteria (2)	17.8445	16.0711
LR890452.1	0.0786628	0	106	503	circular	2020-10-30								IncFII(K)_1, CP000648, |IncFIB(K)_1, JN233704,	IncF RST(K7:A-:B-):FIA(-);FIB(-);FIC(-);FII(-);FIIK(7);FIIS(-);FIIY(-)	228690	52.5646	Klebsiella pneumoniae	Klebsiella pneumoniae (573)	Klebsiella (570)	Enterobacteriaceae (543)	Enterobacterales (91347)	Gammaproteobacteria (1236)	Proteobacteria (1224)	Bacteria (2)	17.8933	16.0509
NZ_CP010574.1	0.0786628	0	106	504	linear	2015-03-04	USA	USA	39.7837	-100.446	excreted bodily substance	Homo sapiens		IncFIB(K)_1, JN233704, |IncFII(K)_1, CP000648,	IncF RST(K1:A-:B-):FIA(-);FIB(-);FIC(-);FII(-);FIIK(1);FIIS(-);FIIY(-)	167664	52.635	Klebsiella pneumoniae	Klebsiella pneumoniae (573)	Klebsiella (570)	Enterobacteriaceae (543)	Enterobacterales (91347)	Gammaproteobacteria (1236)	Proteobacteria (1224)	Bacteria (2)	6.06404	7.865
CP052488.1	0.0790711	0	105	505	circular	2020-05-04	South Korea: Gangwon		37.82	128.16	blood	Homo sapiens		IncFIB(pNDM-Mar)_1, JN420336,	IncF RST(F-:A-:B-):FIA(-);FIB(-);FIC(-);FII(-);FIIK(-);FIIS(-);FIIY(-)	248349	46.1226	Klebsiella pneumoniae	Klebsiella pneumoniae (573)	Klebsiella (570)	Enterobacteriaceae (543)	Enterobacterales (91347)	Gammaproteobacteria (1236)	Proteobacteria (1224)	Bacteria (2)	15.6422	-0.0923534
NZ_CP055311.1	0.0790711	0	105	506	circular	2020-07-30	United Kingdom	United Kingdom	54.7024	-3.27658	Wastewater effluent sample		culture	IncFIB(K)_1, JN233704, |IncFII(K)_1, CP000648,	IncF RST(K5:A-:B-):FIA(-);FIB(-);FIC(-);FII(-);FIIK(5);FIIS(-);FIIY(-)	178153	51.8992	Klebsiella grimontii	Klebsiella grimontii (2058152)	Klebsiella (570)	Enterobacteriaceae (543)	Enterobacterales (91347)	Gammaproteobacteria (1236)	Proteobacteria (1224)	Bacteria (2)	5.64593	7.252
NZ_CP032209.1	0.0790711	0	105	507	circular	2018-09-19	missing				missing	missing		IncFIB(K)_1, JN233704, |IncFII(K)_1, CP000648,	IncF RST(K1:A-:B-):FIA(-);FIB(-);FIC(-);FII(-);FIIK(1);FIIS(-);FIIY(-)	161618	52.0777	Klebsiella pneumoniae	Klebsiella pneumoniae (573)	Klebsiella (570)	Enterobacteriaceae (543)	Enterobacterales (91347)	Gammaproteobacteria (1236)	Proteobacteria (1224)	Bacteria (2)	6.05153	7.82085
NZ_CP019161.1	0.0790711	0	105	508	circular	2018-03-04	China:Fifth Affiliated Hospital of Wenzhou Medical University		28.27	119.54	Drainage samples from liver abscess	Homo sapiens		repB_KLEB_VIR, AP006726, |IncHI1B(pNDM-MAR)_1, JN420336,	IncHI1 MLST(-):HCM1_043(-);HCM1_064(-);HCM1_099(-);HCM1_116(-);HCM1_178ac(-);HCM1_259(-);(-)	261986	49.995	Klebsiella pneumoniae	Klebsiella pneumoniae (573)	Klebsiella (570)	Enterobacteriaceae (543)	Enterobacterales (91347)	Gammaproteobacteria (1236)	Proteobacteria (1224)	Bacteria (2)	4.92765	7.59247
NZ_CP035216.1	0.0790711	0	105	509	circular	2019-01-26	Australia: Queensland	Australia,Queensland	-21.9183	144.459	Rectal Swab	Homo sapiens		IncFII(K)_1, CP000648, |IncFIB(K)_1, JN233704,	IncF RST(K15:A-:B-):FIA(-);FIB(-);FIC(-);FII(-);FIIK(15);FIIS(-);FIIY(-)	231662	52.6236	Klebsiella michiganensis	Klebsiella michiganensis (1134687)	Klebsiella (570)	Enterobacteriaceae (543)	Enterobacterales (91347)	Gammaproteobacteria (1236)	Proteobacteria (1224)	Bacteria (2)	6.25325	7.58439
NZ_CP026172.1	0.0790711	0	105	510	circular	2018-01-31	USA		38.9847	-77.0947				IncHI1B(pNDM-MAR)_1, JN420336, |IncFIB(pNDM-Mar)_1, JN420336,	IncHI1 MLST(-):HCM1_043(-);HCM1_064(-);HCM1_099(-);HCM1_116(-);HCM1_178ac(-);HCM1_259(-);(-)|IncF RST(F-:A-:B-):FIA(-);FIB(-);FIC(-);FII(-);FIIK(-);FIIS(-);FIIY(-)	243967	46.2936	Klebsiella pneumoniae	Klebsiella pneumoniae (573)	Klebsiella (570)	Enterobacteriaceae (543)	Enterobacterales (91347)	Gammaproteobacteria (1236)	Proteobacteria (1224)	Bacteria (2)	15.6497	-0.103153
NZ_CP040862.1	0.0790711	0	105	511	circular	2020-03-01	USA	USA	39.7837	-100.446				IncFII(K)_1, CP000648, |IncFIB(K)_1, JN233704,	IncF RST(K15:A-:B-):FIA(-);FIB(-);FIC(-);FII(-);FIIK(15);FIIS(-);FIIY(-)	263991	53.0045	Klebsiella pneumoniae	Klebsiella pneumoniae (573)	Klebsiella (570)	Enterobacteriaceae (543)	Enterobacterales (91347)	Gammaproteobacteria (1236)	Proteobacteria (1224)	Bacteria (2)	5.67881	7.27572
LR890458.1	0.0790711	0	105	512	circular	2020-10-30								IncFIB(pNDM-Mar)_1, JN420336,	IncF RST(F-:A-:B-):FIA(-);FIB(-);FIC(-);FII(-);FIIK(-);FIIS(-);FIIY(-)	311523	48.4571	Klebsiella pneumoniae	Klebsiella pneumoniae (573)	Klebsiella (570)	Enterobacteriaceae (543)	Enterobacterales (91347)	Gammaproteobacteria (1236)	Proteobacteria (1224)	Bacteria (2)	15.6269	-0.0699148
NZ_CP041374.1	0.0790711	0	105	513	circular	2019-10-07	China: Hangzhou	China,Hangzhou	30.249	120.205	urine	Homo sapiens		repB_KLEB_VIR, AP006726, |IncHI1B(pNDM-MAR)_1, JN420336,	IncHI1 MLST(-):HCM1_043(-);HCM1_064(-);HCM1_099(-);HCM1_116(-);HCM1_178ac(-);HCM1_259(-);(-)	197415	50.0448	Klebsiella pneumoniae	Klebsiella pneumoniae (573)	Klebsiella (570)	Enterobacteriaceae (543)	Enterobacterales (91347)	Gammaproteobacteria (1236)	Proteobacteria (1224)	Bacteria (2)	4.80365	8.70732
CP052559.1	0.0790711	0	105	514	circular	2020-05-04	South Korea: Seoul		37.57	126.98	blood	Homo sapiens		IncFIB(K)_1, JN233704,	IncF RST(F-:A-:B-):FIA(-);FIB(-);FIC(-);FII(-);FIIK(-);FIIS(-);FIIY(-)	143110	51.8329	Klebsiella pneumoniae	Klebsiella pneumoniae (573)	Klebsiella (570)	Enterobacteriaceae (543)	Enterobacterales (91347)	Gammaproteobacteria (1236)	Proteobacteria (1224)	Bacteria (2)	5.66662	8.24293
NZ_CP027063.3	0.0790711	0	105	515	circular	2018-02-23	China: Sichuan, Chengdu	China,Sichuan,Chengdu	30.6766	104.061		Homo sapiens	Culture	repB_KLEB_VIR, AP006726, |IncHI1B(pNDM-MAR)_1, JN420336,	IncHI1 MLST(-):HCM1_043(-);HCM1_064(-);HCM1_099(-);HCM1_116(-);HCM1_178ac(-);HCM1_259(-);(-)	236161	50.4169	Klebsiella variicola	Klebsiella variicola (244366)	Klebsiella (570)	Enterobacteriaceae (543)	Enterobacterales (91347)	Gammaproteobacteria (1236)	Proteobacteria (1224)	Bacteria (2)	4.98428	7.54951
NZ_CP053036.1	0.0790711	0	105	516	circular	2020-09-14	Brazil: Sao Paulo		-23.5975	-46.6436	blood	Homo sapiens		IncFIB(K)_1, JN233704, |IncFII(K)_1, CP000648,	IncF RST(K5:A-:B-):FIA(-);FIB(-);FIC(-);FII(-);FIIK(5);FIIS(-);FIIY(-)	248660	52.5734	Klebsiella pneumoniae	Klebsiella pneumoniae (573)	Klebsiella (570)	Enterobacteriaceae (543)	Enterobacterales (91347)	Gammaproteobacteria (1236)	Proteobacteria (1224)	Bacteria (2)	6.5071	7.69016
NZ_CP020842.1	0.0790711	0	105	517	circular	2017-05-25	USA: Houston		29.7107	-95.4006	respiratory	Homo sapiens		IncFIB(K)_1, JN233704, |IncFII(K)_1, CP000648,	IncF RST(K1:A-:B-):FIA(-);FIB(-);FIC(-);FII(-);FIIK(1);FIIS(-);FIIY(-)	180210	52.3323	Klebsiella pneumoniae	Klebsiella pneumoniae (573)	Klebsiella (570)	Enterobacteriaceae (543)	Enterobacterales (91347)	Gammaproteobacteria (1236)	Proteobacteria (1224)	Bacteria (2)	6.09521	7.83597
NZ_CP033955.1	0.0790711	0	105	518	circular	2019-06-29	China:Zhejiang		29.8	118.2	stool	Homo sapiens		repB_KLEB_VIR, AP006726, |IncHI1B(pNDM-MAR)_1, JN420336,	IncHI1 MLST(-):HCM1_043(-);HCM1_064(-);HCM1_099(-);HCM1_116(-);HCM1_178ac(-);HCM1_259(-);(-)	198087	50.1012	Klebsiella pneumoniae	Klebsiella pneumoniae (573)	Klebsiella (570)	Enterobacteriaceae (543)	Enterobacterales (91347)	Gammaproteobacteria (1236)	Proteobacteria (1224)	Bacteria (2)	4.80477	8.70774
NZ_CP046505.1	0.0790711	0	105	519	circular	2020-07-08								IncR_1, DQ449578,		66651	50.7524	Citrobacter freundii	Citrobacter freundii (546)	Citrobacter (544)	Enterobacteriaceae (543)	Enterobacterales (91347)	Gammaproteobacteria (1236)	Proteobacteria (1224)	Bacteria (2)	4.72776	5.35904
MN543579.1	0.0790711	0	105	520	circular	2020-06-12								IncFIB(K)(pCAV1099-114)_1, CP011596,	IncF RST(F-:A-:B-):FIA(-);FIB(-);FIC(-);FII(-);FIIK(-);FIIS(-);FIIY(-)	140128	49.9001	Klebsiella pneumoniae	Klebsiella pneumoniae (573)	Klebsiella (570)	Enterobacteriaceae (543)	Enterobacterales (91347)	Gammaproteobacteria (1236)	Proteobacteria (1224)	Bacteria (2)	5.15573	7.96168
CP052572.1	0.0790711	0	105	521	circular	2020-05-04	South Korea: Seoul		37.57	126.98	blood	Homo sapiens		IncFIB(K)_1, JN233704,	IncF RST(F-:A-:B-):FIA(-);FIB(-);FIC(-);FII(-);FIIK(-);FIIS(-);FIIY(-)	141542	51.8341	Klebsiella pneumoniae	Klebsiella pneumoniae (573)	Klebsiella (570)	Enterobacteriaceae (543)	Enterobacterales (91347)	Gammaproteobacteria (1236)	Proteobacteria (1224)	Bacteria (2)	5.64497	8.19966
NZ_CP056748.1	0.0794837	0	104	522	circular	2020-08-03	United Kingdom	United Kingdom	54.7024	-3.27658	Wastewater influent sample		culture	IncFII(pECLA)_1, CP001919, |IncFIB(pECLA)_1, CP001919,	IncF RST(F-:A-:B-):FIA(-);FIB(-);FIC(-);FII(-);FIIK(-);FIIS(-);FIIY(-)	96779	54.3434	Enterobacter hormaechei	Enterobacter hormaechei (158836)	Enterobacter (547)	Enterobacteriaceae (543)	Enterobacterales (91347)	Gammaproteobacteria (1236)	Proteobacteria (1224)	Bacteria (2)	4.95132	7.15214
NZ_CP035209.1	0.0794837	0	104	523	circular	2019-10-31	Thailand		13.7367	100.523	stool	Homo sapiens		IncR_1, DQ449578,		73414	53.6451	Klebsiella quasipneumoniae	Klebsiella quasipneumoniae (1463165)	Klebsiella (570)	Enterobacteriaceae (543)	Enterobacterales (91347)	Gammaproteobacteria (1236)	Proteobacteria (1224)	Bacteria (2)	4.60811	5.05895
NZ_AP014952.1	0.0794837	0	104	524	circular	2016-05-28	not applicable							IncFIB(K)_1, JN233704,	IncF RST(F-:A-:B-):FIA(-);FIB(-);FIC(-);FII(-);FIIK(-);FIIS(-);FIIY(-)	209081	52.6772	Klebsiella oxytoca	Klebsiella oxytoca (571)	Klebsiella (570)	Enterobacteriaceae (543)	Enterobacterales (91347)	Gammaproteobacteria (1236)	Proteobacteria (1224)	Bacteria (2)	5.69617	7.28283
NZ_CP031103.1	0.0794837	0	104	525	circular	2018-07-26	China: Hangzhou	China,Hangzhou	30.249	120.205		Homo sapiens		pKP1433_1, JX397875,		92616	52.167	Leclercia sp. W17	Leclercia sp. W17 (2282309)	Leclercia (83654)	Enterobacteriaceae (543)	Enterobacterales (91347)	Gammaproteobacteria (1236)	Proteobacteria (1224)	Bacteria (2)	5.09473	7.21025
NZ_CP056703.1	0.0794837	0	104	526	circular	2020-08-03	United Kingdom	United Kingdom	54.7024	-3.27658	Freshwater sample from downstream of wastewater treatment plant		culture	IncFIA(HI1)_1, AF250878, |IncFII(p14)_1, JQ418538,	IncF RST(F-:A-:B-):FIA(21?);FIB(-);FIC(-);FII(-);FIIK(12?);FIIS(-);FIIY(-)	133995	52.0684	Klebsiella grimontii	Klebsiella grimontii (2058152)	Klebsiella (570)	Enterobacteriaceae (543)	Enterobacterales (91347)	Gammaproteobacteria (1236)	Proteobacteria (1224)	Bacteria (2)	5.44478	7.40918
NZ_AP022358.1	0.0794837	0	104	527	circular	2020-08-04	Japan:Osaka	Japan,Osaka	34.6938	135.501		Homo sapiens		IncFIB(K)_1, JN233704, |IncFII(K)_1, CP000648,	IncF RST(K5:A-:B-):FIA(-);FIB(-);FIC(-);FII(-);FIIK(5);FIIS(-);FIIY(-)	192008	51.3854	Klebsiella pneumoniae	Klebsiella pneumoniae (573)	Klebsiella (570)	Enterobacteriaceae (543)	Enterobacterales (91347)	Gammaproteobacteria (1236)	Proteobacteria (1224)	Bacteria (2)	5.66286	7.26316
NZ_CP021686.1	0.0794837	0	104	528	circular	2017-06-10	missing				missing	missing		IncFIB(K)_1, JN233704, |IncFII(K)_1, CP000648,	IncF RST(K19:A-:B-):FIA(-);FIB(-);FIC(-);FII(-);FIIK(19);FIIS(-);FIIY(-)	183376	51.1043	Klebsiella pneumoniae	Klebsiella pneumoniae (573)	Klebsiella (570)	Enterobacteriaceae (543)	Enterobacterales (91347)	Gammaproteobacteria (1236)	Proteobacteria (1224)	Bacteria (2)	6.25114	7.54955
LR890513.1	0.0794837	0	104	529	circular	2020-10-30								IncFIB(K)_1, JN233704,	IncF RST(F-:A-:B-):FIA(-);FIB(-);FIC(-);FII(-);FIIK(-);FIIS(-);FIIY(-)	276381	53.0366	Klebsiella pneumoniae	Klebsiella pneumoniae (573)	Klebsiella (570)	Enterobacteriaceae (543)	Enterobacterales (91347)	Gammaproteobacteria (1236)	Proteobacteria (1224)	Bacteria (2)	5.66208	7.25342
LR890324.1	0.0794837	0	104	530	circular	2020-10-30								IncFIB(K)_1, JN233704,	IncF RST(F-:A-:B-):FIA(-);FIB(-);FIC(-);FII(-);FIIK(-);FIIS(-);FIIY(-)	138469	52.0781	Klebsiella pneumoniae	Klebsiella pneumoniae (573)	Klebsiella (570)	Enterobacteriaceae (543)	Enterobacterales (91347)	Gammaproteobacteria (1236)	Proteobacteria (1224)	Bacteria (2)	5.52164	7.46801
NZ_CP056486.1	0.0794837	0	104	531	circular	2020-08-03	United Kingdom	United Kingdom	54.7024	-3.27658	Wastewater effluent sample		culture	IncFIB(K)_1, JN233704, |IncFII(pKP91)_1, CP000966,	IncF RST(K17:A-:B-):FIA(-);FIB(-);FIC(-);FII(-);FIIK(17);FIIS(-);FIIY(10?)	115642	51.5098	Klebsiella sp. RHBSTW-00464	Klebsiella sp. RHBSTW-00464 (2742649)	Klebsiella (570)	Enterobacteriaceae (543)	Enterobacterales (91347)	Gammaproteobacteria (1236)	Proteobacteria (1224)	Bacteria (2)	5.36431	7.16251
NZ_MT439327.1	0.0794837	0	104	532	circular	2020-08-04								IncFII(K)_1, CP000648, |IncFIB(K)_1, JN233704,	IncF RST(K19:A-:B-):FIA(-);FIB(-);FIC(-);FII(-);FIIK(19);FIIS(-);FIIY(-)	189780	51.0681	Klebsiella pneumoniae	Klebsiella pneumoniae (573)	Klebsiella (570)	Enterobacteriaceae (543)	Enterobacterales (91347)	Gammaproteobacteria (1236)	Proteobacteria (1224)	Bacteria (2)	6.25719	7.5695
NZ_CP056761.1	0.0794837	0	104	533	circular	2020-08-03	United Kingdom	United Kingdom	54.7024	-3.27658	Freshwater sample from downstream of wastewater treatment plant		culture	IncFIB(K)_1, JN233704, |IncFII(K)_1, CP000648,	IncF RST(K1:A-:B-):FIA(-);FIB(-);FIC(-);FII(-);FIIK(1);FIIS(-);FIIY(-)	156264	51.9928	Klebsiella grimontii	Klebsiella grimontii (2058152)	Klebsiella (570)	Enterobacteriaceae (543)	Enterobacterales (91347)	Gammaproteobacteria (1236)	Proteobacteria (1224)	Bacteria (2)	5.75149	7.64554
NZ_CP035636.1	0.0794837	0	104	534	circular	2019-02-15	China:Anhui		31.49	117.13	blood	Homo sapiens		IncFIB(pECLA)_1, CP001919, |IncFIB(pENTE01)_1, CP000654,	IncF RST(F-:A-:B-):FIA(-);FIB(-);FIC(-);FII(-);FIIK(-);FIIS(-);FIIY(-)	103522	52.0034	Enterobacter cloacae	Enterobacter cloacae (550)	Enterobacter (547)	Enterobacteriaceae (543)	Enterobacterales (91347)	Gammaproteobacteria (1236)	Proteobacteria (1224)	Bacteria (2)	5.00649	7.20071
NZ_CP058113.1	0.0794837	0	104	535	circular	2020-07-30	United Kingdom	United Kingdom	54.7024	-3.27658	Freshwater sample from downstream of wastewater treatment plant		culture	IncFIB(K)_1, JN233704, |IncFII(K)_1, CP000648,	IncF RST(K1:A-:B-):FIA(-);FIB(-);FIC(-);FII(-);FIIK(1);FIIS(-);FIIY(-)	156264	51.9921	Klebsiella grimontii	Klebsiella grimontii (2058152)	Klebsiella (570)	Enterobacteriaceae (543)	Enterobacterales (91347)	Gammaproteobacteria (1236)	Proteobacteria (1224)	Bacteria (2)	5.73097	7.61531
NZ_CP058181.1	0.0794837	0	104	536	circular	2020-07-30	United Kingdom	United Kingdom	54.7024	-3.27658	Freshwater sample from downstream of wastewater treatment plant		culture	IncFII(p14)_1, JQ418538, |IncFIA(HI1)_1, AF250878,	IncF RST(F-:A-:B-):FIA(21?);FIB(-);FIC(-);FII(-);FIIK(12?);FIIS(-);FIIY(-)	133995	52.0669	Klebsiella grimontii	Klebsiella grimontii (2058152)	Klebsiella (570)	Enterobacteriaceae (543)	Enterobacterales (91347)	Gammaproteobacteria (1236)	Proteobacteria (1224)	Bacteria (2)	5.44953	7.40394
NZ_CP035536.1	0.0799006	0	103	537	circular	2019-08-15	Canada:Quebec City		46.8371	-71.2265	anal sample	Homo sapiens		IncFIB(K)_1, JN233704, |IncFII(K)_1, CP000648,	IncF RST(K19:A-:B-):FIA(-);FIB(-);FIC(-);FII(-);FIIK(19);FIIS(-);FIIY(-)	185957	50.9564	Klebsiella pneumoniae subsp. pneumoniae	Klebsiella pneumoniae (573)	Klebsiella (570)	Enterobacteriaceae (543)	Enterobacterales (91347)	Gammaproteobacteria (1236)	Proteobacteria (1224)	Bacteria (2)	6.21968	7.57107
NZ_CP020062.1	0.0799006	0	103	538	circular	2017-03-23	missing				missing	missing		IncFII(K)_1, CP000648, |IncFIB(K)_1, JN233704,	IncF RST(K3:A-:B-):FIA(-);FIB(-);FIC(-);FII(-);FIIK(3);FIIS(-);FIIY(-)	152697	50.4732	Klebsiella pneumoniae	Klebsiella pneumoniae (573)	Klebsiella (570)	Enterobacteriaceae (543)	Enterobacterales (91347)	Gammaproteobacteria (1236)	Proteobacteria (1224)	Bacteria (2)	5.88059	7.7823
AP023455.1	0.0799006	0	103	539	circular	2020-09-24	Myanmar:Yangon		16.7788	96.149		Homo sapiens		IncFIB(K)_1, JN233704, |IncFII(K)_1, CP000648,	IncF RST(K19:A-:B-):FIA(-);FIB(-);FIC(-);FII(-);FIIK(19);FIIS(-);FIIY(-)	185769	51.1156	Klebsiella pneumoniae	Klebsiella pneumoniae (573)	Klebsiella (570)	Enterobacteriaceae (543)	Enterobacterales (91347)	Gammaproteobacteria (1236)	Proteobacteria (1224)	Bacteria (2)	6.25829	7.56583
LR890423.1	0.0799006	0	103	540	circular	2020-10-30								IncFIB(K)_1, JN233704, |IncFII(K)_1, CP000648,	IncF RST(K8:A-:B-):FIA(-);FIB(-);FIC(-);FII(-);FIIK(8);FIIS(-);FIIY(-)	152399	51.8691	Klebsiella pneumoniae	Klebsiella pneumoniae (573)	Klebsiella (570)	Enterobacteriaceae (543)	Enterobacterales (91347)	Gammaproteobacteria (1236)	Proteobacteria (1224)	Bacteria (2)	17.6697	16.1965
CP052405.1	0.0799006	0	103	541	circular	2020-05-04	South Korea: Gangwon		37.82	128.16	blood	Homo sapiens		IncFIB(K)_1, JN233704, |IncFII(K)_1, CP000648,	IncF RST(K5:A-:B-):FIA(-);FIB(-);FIC(-);FII(-);FIIK(5);FIIS(-);FIIY(-)	233676	52.1303	Klebsiella pneumoniae	Klebsiella pneumoniae (573)	Klebsiella (570)	Enterobacteriaceae (543)	Enterobacterales (91347)	Gammaproteobacteria (1236)	Proteobacteria (1224)	Bacteria (2)	6.51812	7.66434
NZ_LN824134.1	0.0799006	0	103	542	circular	2015-12-01					urine	Homo sapiens		IncFIB(pNDM-Mar)_1, JN420336, |IncHI1B(pNDM-MAR)_1, JN420336,	IncF RST(F-:A-:B-):FIA(-);FIB(-);FIC(-);FII(-);FIIK(-);FIIS(-);FIIY(-)|IncHI1 MLST(-):HCM1_043(-);HCM1_064(-);HCM1_099(-);HCM1_116(-);HCM1_178ac(-);HCM1_259(-);(-)	279305	46.7253	Klebsiella pneumoniae	Klebsiella pneumoniae (573)	Klebsiella (570)	Enterobacteriaceae (543)	Enterobacterales (91347)	Gammaproteobacteria (1236)	Proteobacteria (1224)	Bacteria (2)	15.6448	-0.087315
NZ_CP022125.1	0.0799006	0	103	543	circular	2017-07-03	USA: Nevada	USA,Nevada	39.5159	-116.854	wound	Homo sapiens		IncFIB(K)_1, JN233704, |IncFII(K)_1, CP000648,	IncF RST(K19:A-:B-):FIA(-);FIB(-);FIC(-);FII(-);FIIK(19);FIIS(-);FIIY(-)	187721	51.0774	Klebsiella pneumoniae	Klebsiella pneumoniae (573)	Klebsiella (570)	Enterobacteriaceae (543)	Enterobacterales (91347)	Gammaproteobacteria (1236)	Proteobacteria (1224)	Bacteria (2)	6.25449	7.56066
NZ_MG288676.1	0.080322	0	102	544	circular	2020-06-03								IncFII(K)_1, CP000648, |IncFIB(K)_1, JN233704,	IncF RST(K8:A-:B-):FIA(-);FIB(-);FIC(-);FII(-);FIIK(8);FIIS(-);FIIY(-)	164731	51.5198	Klebsiella pneumoniae	Klebsiella pneumoniae (573)	Klebsiella (570)	Enterobacteriaceae (543)	Enterobacterales (91347)	Gammaproteobacteria (1236)	Proteobacteria (1224)	Bacteria (2)	5.9717	7.77494
NC_024992.1	0.080322	0	102	545	circular	2014-08-24								IncFIB(K)_1, JN233704, |IncFII(K)_1, CP000648,	IncF RST(K13:A-:B-):FIA(-);FIB(-);FIC(-);FII(-);FIIK(13);FIIS(-);FIIY(-)	182204	51.6108	Klebsiella pneumoniae	Klebsiella pneumoniae (573)	Klebsiella (570)	Enterobacteriaceae (543)	Enterobacterales (91347)	Gammaproteobacteria (1236)	Proteobacteria (1224)	Bacteria (2)	6.06115	7.8504
NZ_CP032208.1	0.080322	0	102	546	circular	2018-09-19	missing				missing	missing		IncHI1B(pNDM-MAR)_1, JN420336,	IncHI1 MLST(-):HCM1_043(-);HCM1_064(-);HCM1_099(-);HCM1_116(-);HCM1_178ac(-);HCM1_259(-);(-)	310872	47.3011	Klebsiella pneumoniae	Klebsiella pneumoniae (573)	Klebsiella (570)	Enterobacteriaceae (543)	Enterobacterales (91347)	Gammaproteobacteria (1236)	Proteobacteria (1224)	Bacteria (2)	15.6488	-0.0883232
NZ_CP029387.1	0.080322	0	102	547	circular	2018-05-15	China: Sichuan	China,Sichuan	30.5	102.5		Homo sapiens	Pure Culture	IncFIB(K)_1, JN233704, |IncFII(K)_1, CP000648,	IncF RST(K5:A-:B-):FIA(-);FIB(-);FIC(-);FII(-);FIIK(5);FIIS(-);FIIY(-)	226524	52.2828	Klebsiella pneumoniae subsp. pneumoniae	Klebsiella pneumoniae (573)	Klebsiella (570)	Enterobacteriaceae (543)	Enterobacterales (91347)	Gammaproteobacteria (1236)	Proteobacteria (1224)	Bacteria (2)	6.46887	7.6853
NZ_MN842293.1	0.080322	0	102	548	circular	2020-08-04								IncFIB(K)_1, JN233704, |IncFII(K)_1, CP000648,	IncF RST(K1:A-:B-):FIA(-);FIB(-);FIC(-);FII(-);FIIK(1);FIIS(-);FIIY(-)	185726	53.4373	Klebsiella pneumoniae	Klebsiella pneumoniae (573)	Klebsiella (570)	Enterobacteriaceae (543)	Enterobacterales (91347)	Gammaproteobacteria (1236)	Proteobacteria (1224)	Bacteria (2)	6.05308	7.89012
NZ_AP021910.1	0.080322	0	102	549	circular	2020-08-13	Japan:Tokyo		35.664	139.438				IncFII(pKP91)_1, CP000966, |IncFIB(K)_1, JN233704,	IncF RST(K9:A-:B-):FIA(-);FIB(-);FIC(-);FII(-);FIIK(9);FIIS(-);FIIY(-)	139376	50.833	Klebsiella pneumoniae	Klebsiella pneumoniae (573)	Klebsiella (570)	Enterobacteriaceae (543)	Enterobacterales (91347)	Gammaproteobacteria (1236)	Proteobacteria (1224)	Bacteria (2)	5.6491	8.54689
NZ_CP015501.1	0.080322	0	102	550	circular	2016-05-17	United Arab Emirates		23.8532	54.6762	Urine sample	Homo sapiens		IncHI1B(pNDM-MAR)_1, JN420336, |IncFIB(pNDM-Mar)_1, JN420336,	IncHI1 MLST(-):HCM1_043(-);HCM1_064(-);HCM1_099(-);HCM1_116(-);HCM1_178ac(-);HCM1_259(-);(-)|IncF RST(F-:A-:B-):FIA(-);FIB(-);FIC(-);FII(-);FIIK(-);FIIS(-);FIIY(-)	281190	46.7997	Klebsiella pneumoniae	Klebsiella pneumoniae (573)	Klebsiella (570)	Enterobacteriaceae (543)	Enterobacterales (91347)	Gammaproteobacteria (1236)	Proteobacteria (1224)	Bacteria (2)	15.6451	-0.083044
NZ_MT439326.1	0.080322	0	102	551	circular	2020-08-04								IncFIB(K)_1, JN233704, |IncFII(K)_1, CP000648,	IncF RST(K19:A-:B-):FIA(-);FIB(-);FIC(-);FII(-);FIIK(19);FIIS(-);FIIY(-)	199248	51.3099	Klebsiella pneumoniae	Klebsiella pneumoniae (573)	Klebsiella (570)	Enterobacteriaceae (543)	Enterobacterales (91347)	Gammaproteobacteria (1236)	Proteobacteria (1224)	Bacteria (2)	6.28498	7.5737
NZ_CP037929.1	0.0807479	0	101	552	circular	2020-01-16	Italy:Palermo		38.1018	13.3585	blood	Homo sapiens		IncFIB(K)_1, JN233704, |IncFII(K)_1, CP000648,	IncF RST(K7:A-:B-):FIA(-);FIB(-);FIC(-);FII(-);FIIK(7);FIIS(-);FIIY(-)	271781	53.163	Klebsiella pneumoniae subsp. pneumoniae	Klebsiella pneumoniae (573)	Klebsiella (570)	Enterobacteriaceae (543)	Enterobacterales (91347)	Gammaproteobacteria (1236)	Proteobacteria (1224)	Bacteria (2)	6.03129	7.92405
NZ_MN922301.1	0.0807479	0	101	553	circular	2020-08-04								IncFIB(K)_1, JN233704, |IncFII(K)_1, CP000648,	IncF RST(K7:A-:B-):FIA(-);FIB(-);FIC(-);FII(-);FIIK(7);FIIS(-);FIIY(-)	271781	53.163	Klebsiella pneumoniae	Klebsiella pneumoniae (573)	Klebsiella (570)	Enterobacteriaceae (543)	Enterobacterales (91347)	Gammaproteobacteria (1236)	Proteobacteria (1224)	Bacteria (2)	5.99203	7.92694
NZ_CP040030.1	0.0807479	0	101	554	circular	2020-03-15	Taiwan:Taichung		23.3	120.9	pus	Homo sapiens		IncFIB(K)_1, JN233704, |IncFII(K)_1, CP000648,	IncF RST(K1:A-:B-):FIA(-);FIB(-);FIC(-);FII(-);FIIK(1);FIIS(-);FIIY(-)	148625	51.4981	Klebsiella pneumoniae	Klebsiella pneumoniae (573)	Klebsiella (570)	Enterobacteriaceae (543)	Enterobacterales (91347)	Gammaproteobacteria (1236)	Proteobacteria (1224)	Bacteria (2)	6.06112	7.85569
NZ_CP018961.1	0.0807479	0	101	555	circular	2017-03-06	Ecuador: Quito		-0.18	-78.47		Homo sapiens		IncFIB(pNDM-Mar)_1, JN420336, |IncHI1B(pNDM-MAR)_1, JN420336,	IncF RST(F-:A-:B-):FIA(-);FIB(-);FIC(-);FII(-);FIIK(-);FIIS(-);FIIY(-)|IncHI1 MLST(-):HCM1_043(-);HCM1_064(-);HCM1_099(-);HCM1_116(-);HCM1_178ac(-);HCM1_259(-);(-)	289903	46.4279	Escherichia coli	Escherichia coli (562)	Escherichia (561)	Enterobacteriaceae (543)	Enterobacterales (91347)	Gammaproteobacteria (1236)	Proteobacteria (1224)	Bacteria (2)	15.6561	-0.0699436
CP052539.1	0.0807479	0	101	556	circular	2020-05-04	South Korea: Gyeonggi		37.66	126.77	blood	Homo sapiens		IncFIB(pNDM-Mar)_1, JN420336, |IncHI1B(pNDM-MAR)_1, JN420336,	IncF RST(F-:A-:B-):FIA(-);FIB(-);FIC(-);FII(-);FIIK(-);FIIS(-);FIIY(-)|IncHI1 MLST(-):HCM1_043(-);HCM1_064(-);HCM1_099(-);HCM1_116(-);HCM1_178ac(-);HCM1_259(-);(-)	217684	45.0511	Klebsiella pneumoniae	Klebsiella pneumoniae (573)	Klebsiella (570)	Enterobacteriaceae (543)	Enterobacterales (91347)	Gammaproteobacteria (1236)	Proteobacteria (1224)	Bacteria (2)	15.653	-0.0815351
CP044381.1	0.0807479	0	101	557	circular	2019-12-11	Taiwan	Taiwan	23.5983	120.835	missing	Homo sapiens		IncHI1B(pNDM-MAR)_1, JN420336, |IncN_1, AY046276, |IncFIB(pNDM-Mar)_1, JN420336,	IncHI1 MLST(-):HCM1_043(-);HCM1_064(-);HCM1_099(-);HCM1_116(-);HCM1_178ac(-);HCM1_259(-);(-)|IncN MLST(-):repN(~1);traJ(-);korA(-)|IncF RST(F-:A-:B-):FIA(-);FIB(-);FIC(-);FII(-);FIIK(-);FIIS(-);FIIY(-)	312615	47.2242	Klebsiella pneumoniae	Klebsiella pneumoniae (573)	Klebsiella (570)	Enterobacteriaceae (543)	Enterobacterales (91347)	Gammaproteobacteria (1236)	Proteobacteria (1224)	Bacteria (2)	15.6528	-0.0745277
NZ_CP040025.1	0.0807479	0	101	558	circular	2020-03-15	Taiwan:Taichung		23.3	120.9	blood	Homo sapiens		IncFIB(K)_1, JN233704, |IncFII(K)_1, CP000648,	IncF RST(K1:A-:B-):FIA(-);FIB(-);FIC(-);FII(-);FIIK(1);FIIS(-);FIIY(-)	150325	51.4605	Klebsiella pneumoniae	Klebsiella pneumoniae (573)	Klebsiella (570)	Enterobacteriaceae (543)	Enterobacterales (91347)	Gammaproteobacteria (1236)	Proteobacteria (1224)	Bacteria (2)	6.0107	7.85463
NZ_CP027613.1	0.0807479	0	101	559	circular	2018-03-23	missing				missing	missing		IncFII(K)_1, CP000648, |IncFIB(K)_1, JN233704,	IncF RST(K8:A-:B-):FIA(-);FIB(-);FIC(-);FII(-);FIIK(8);FIIS(-);FIIY(-)	191856	51.5892	Klebsiella pneumoniae subsp. ozaenae	Klebsiella pneumoniae (573)	Klebsiella (570)	Enterobacteriaceae (543)	Enterobacterales (91347)	Gammaproteobacteria (1236)	Proteobacteria (1224)	Bacteria (2)	6.00887	7.81939
NZ_CP012989.1	0.0807479	0	101	560	circular	2016-01-27	Canada: Calgary		51.0198	-114.055	urine	Homo sapiens		IncFIB(K)_1, JN233704,	IncF RST(F-:A-:B-):FIA(-);FIB(-);FIC(-);FII(-);FIIK(-);FIIS(-);FIIY(-)	134064	51.829	Klebsiella pneumoniae	Klebsiella pneumoniae (573)	Klebsiella (570)	Enterobacteriaceae (543)	Enterobacterales (91347)	Gammaproteobacteria (1236)	Proteobacteria (1224)	Bacteria (2)	5.55104	7.46682
NZ_CP023947.1	0.0811785	0	100	561	circular	2017-10-20	Canada:BC	Canada,BC	55.0013	-125.002	rectal	Homo sapiens		IncFII(pKP91)_1, CP000966, |IncFIB(K)_1, JN233704, |IncQ1_1, M28829,	IncF RST(K9:A-:B-):FIA(-);FIB(-);FIC(-);FII(-);FIIK(9);FIIS(-);FIIY(-)	153385	51.7593	Klebsiella pneumoniae	Klebsiella pneumoniae (573)	Klebsiella (570)	Enterobacteriaceae (543)	Enterobacterales (91347)	Gammaproteobacteria (1236)	Proteobacteria (1224)	Bacteria (2)	5.67659	8.21265
NZ_CP040186.1	0.0811785	0	100	562	circular	2020-07-24	China		38.15	116.5	cerebrospinal fluid, hospital	Homosapiens		IncFII(pKP91)_1, CP000966, |IncFIB(K)_1, JN233704,	IncF RST(K17:A-:B-):FIA(-);FIB(-);FIC(-);FII(-);FIIK(17);FIIS(-);FIIY(10?)	110998	50.5541	Raoultella planticola	Raoultella planticola (575)	Raoultella (160674)	Enterobacteriaceae (543)	Enterobacterales (91347)	Gammaproteobacteria (1236)	Proteobacteria (1224)	Bacteria (2)	5.45337	7.32196
CP026189.1	0.0811785	0	100	563	circular	2018-01-29	USA		38.9847	-77.0947				IncFII(pSFO)_1, AF401292,	IncF RST(F-:A-:B-):FIA(-);FIB(-);FIC(-);FII(-);FIIK(-);FIIS(-);FIIY(-)	171306	53.628	Enterobacteriaceae bacterium ENNIH2	Enterobacteriaceae bacterium ENNIH2 (1920109)		Enterobacteriaceae (543)	Enterobacterales (91347)	Gammaproteobacteria (1236)	Proteobacteria (1224)	Bacteria (2)	5.19595	7.40255
NZ_CP046940.1	0.0811785	0	100	564	linear	2020-01-02	Bangladesh: Dhaka	Bangladesh,Dhaka	23.7594	90.3788		Homo sapiens	Pure culture one microbial species	IncFII(K)_1, CP000648, |IncFIB(K)_1, JN233704,	IncF RST(F-:A-:B-):FIA(-);FIB(-);FIC(-);FII(-);FIIK(-);FIIS(-);FIIY(-)	153682	51.5753	Klebsiella pneumoniae	Klebsiella pneumoniae (573)	Klebsiella (570)	Enterobacteriaceae (543)	Enterobacterales (91347)	Gammaproteobacteria (1236)	Proteobacteria (1224)	Bacteria (2)	5.79104	8.34046
NZ_CP028995.1	0.0811785	0	100	565	circular	2018-05-02	missing				missing	missing		IncFIB(K)_1, JN233704, |IncFII(K)_1, CP000648,	IncF RST(K2:A-:B-):FIA(-);FIB(-);FIC(-);FII(-);FIIK(2);FIIS(-);FIIY(-)	152176	51.4641	Klebsiella pneumoniae	Klebsiella pneumoniae (573)	Klebsiella (570)	Enterobacteriaceae (543)	Enterobacterales (91347)	Gammaproteobacteria (1236)	Proteobacteria (1224)	Bacteria (2)	6.07879	7.87796
LR890279.1	0.0811785	0	100	566	circular	2020-10-30								IncFIB(K)_1, JN233704,	IncF RST(F-:A-:B-):FIA(-);FIB(-);FIC(-);FII(-);FIIK(-);FIIS(-);FIIY(-)	134665	51.4855	Klebsiella pneumoniae	Klebsiella pneumoniae (573)	Klebsiella (570)	Enterobacteriaceae (543)	Enterobacterales (91347)	Gammaproteobacteria (1236)	Proteobacteria (1224)	Bacteria (2)	5.5325	7.50769
LR890642.1	0.0811785	0	100	567	circular	2020-10-30								IncFIB(K)_1, JN233704,	IncF RST(F-:A-:B-):FIA(-);FIB(-);FIC(-);FII(-);FIIK(-);FIIS(-);FIIY(-)	134665	51.4863	Klebsiella pneumoniae	Klebsiella pneumoniae (573)	Klebsiella (570)	Enterobacteriaceae (543)	Enterobacterales (91347)	Gammaproteobacteria (1236)	Proteobacteria (1224)	Bacteria (2)	5.50703	7.50132
NZ_CP063931.1	0.0811785	0	100	568	circular	2020-11-10	China:Tangshan		39.36	118.11	Human fecal samples			IncHI1B(pNDM-MAR)_1, JN420336, |repB_KLEB_VIR, AP006726,	IncHI1 MLST(-):HCM1_043(-);HCM1_064(-);HCM1_099(-);HCM1_116(-);HCM1_178ac(-);HCM1_259(-);(-)	191041	50.2096	Klebsiella pneumoniae	Klebsiella pneumoniae (573)	Klebsiella (570)	Enterobacteriaceae (543)	Enterobacterales (91347)	Gammaproteobacteria (1236)	Proteobacteria (1224)	Bacteria (2)	4.9489	7.53225
NZ_AP023340.1	0.0811785	0	100	569	circular	2020-09-26	Viet Nam:Hanoi		21.0277	105.834		Homo sapiens		IncFIB(K)_1, JN233704, |IncFII(K)_1, CP000648,	IncF RST(K8:A-:B-):FIA(-);FIB(-);FIC(-);FII(-);FIIK(8);FIIS(-);FIIY(-)	160398	51.9707	Klebsiella pneumoniae	Klebsiella pneumoniae (573)	Klebsiella (570)	Enterobacteriaceae (543)	Enterobacterales (91347)	Gammaproteobacteria (1236)	Proteobacteria (1224)	Bacteria (2)	6.03167	7.81173
NZ_CP044528.1	0.0811785	0	100	570	circular	2019-10-07	United Kingdom		51.5074	-0.1278	Coffee Cup			IncFIA(HI1)_1, AF250878, |IncFII(p14)_1, JQ418538,	IncF RST(F-:A-:B-):FIA(21?);FIB(-);FIC(-);FII(-);FIIK(12?);FIIS(-);FIIY(-)	133593	52.1075	Klebsiella grimontii	Klebsiella grimontii (2058152)	Klebsiella (570)	Enterobacteriaceae (543)	Enterobacterales (91347)	Gammaproteobacteria (1236)	Proteobacteria (1224)	Bacteria (2)	5.37709	7.36336
NZ_MK413721.1	0.0816138	0	99	571	circular	2020-06-04								IncHI1B(pNDM-MAR)_1, JN420336, |IncFIB(pNDM-Mar)_1, JN420336,	IncHI1 MLST(-):HCM1_043(-);HCM1_064(-);HCM1_099(-);HCM1_116(-);HCM1_178ac(-);HCM1_259(-);(-)|IncF RST(F-:A-:B-):FIA(-);FIB(-);FIC(-);FII(-);FIIK(-);FIIS(-);FIIY(-)	270105	46.5671	Klebsiella pneumoniae	Klebsiella pneumoniae (573)	Klebsiella (570)	Enterobacteriaceae (543)	Enterobacterales (91347)	Gammaproteobacteria (1236)	Proteobacteria (1224)	Bacteria (2)	15.65	-0.058113
NZ_CP061381.1	0.0816138	0	99	572	circular	2020-09-11	USA: Chicago, IL		41.8945	-87.6208	unknown	Homo sapiens		IncFIB(K)_1, JN233704,	IncF RST(F-:A-:B-):FIA(-);FIB(-);FIC(-);FII(-);FIIK(-);FIIS(-);FIIY(-)	161774	51.2011	Klebsiella pneumoniae	Klebsiella pneumoniae (573)	Klebsiella (570)	Enterobacteriaceae (543)	Enterobacterales (91347)	Gammaproteobacteria (1236)	Proteobacteria (1224)	Bacteria (2)	5.51598	7.43828
NZ_CP014697.2	0.0816138	0	99	573	circular	2016-03-23	USA: VA	USA,VA	37.1232	-78.4928	Urine from hospitalized patient	Homo sapiens		IncFII(K)_1, CP000648, |IncFIB(K)_1, JN233704,	IncF RST(K1:A-:B-):FIA(-);FIB(-);FIC(-);FII(-);FIIK(1);FIIS(-);FIIY(-)	152001	51.9983	Klebsiella quasipneumoniae	Klebsiella quasipneumoniae (1463165)	Klebsiella (570)	Enterobacteriaceae (543)	Enterobacterales (91347)	Gammaproteobacteria (1236)	Proteobacteria (1224)	Bacteria (2)	5.55089	7.59814
NC_021198.1	0.0816138	0	99	574	circular	2013-05-13								IncFIB(K)_1, JN233704, |IncFII(pKPX1)_1, AP012055,	IncF RST(F-:A-:B-):FIA(-);FIB(-);FIC(-);FII(-);FIIK(-);FIIS(-);FIIY(-)	250444	53.4207	Klebsiella pneumoniae subsp. pneumoniae KPX	Klebsiella pneumoniae (573)	Klebsiella (570)	Enterobacteriaceae (543)	Enterobacterales (91347)	Gammaproteobacteria (1236)	Proteobacteria (1224)	Bacteria (2)	16.4615	1.96772
NZ_AP022016.1	0.0816138	0	99	575	circular	2020-08-13	Japan:Tokyo		35.6684	139.428				IncFIA(HI1)_1, AF250878, |IncFII(K)_1, CP000648,	IncF RST(K3:A-:B-):FIA(21?);FIB(-);FIC(-);FII(-);FIIK(3);FIIS(-);FIIY(-)	139507	51.7329	Klebsiella quasipneumoniae	Klebsiella quasipneumoniae (1463165)	Klebsiella (570)	Enterobacteriaceae (543)	Enterobacterales (91347)	Gammaproteobacteria (1236)	Proteobacteria (1224)	Bacteria (2)	5.91184	7.78277
NZ_CP029598.1	0.0816138	0	99	576	circular	2018-06-02	USA: Richmond, VA	USA,Richmond,VA	49.1977	-123.191	urine	Homo sapiens	unknown	IncFIB(K)_1, JN233704, |IncFII(K)_1, CP000648,	IncF RST(K1:A-:B-):FIA(-);FIB(-);FIC(-);FII(-);FIIK(1);FIIS(-);FIIY(-)	151998	51.9974	Klebsiella quasipneumoniae subsp. similipneumoniae	Klebsiella quasipneumoniae (1463165)	Klebsiella (570)	Enterobacteriaceae (543)	Enterobacterales (91347)	Gammaproteobacteria (1236)	Proteobacteria (1224)	Bacteria (2)	5.52909	7.61857
MN543573.1	0.0816138	0	99	577	circular	2020-06-12								IncFIB(K)_1, JN233704, |IncFII(K)_1, CP000648,	IncF RST(K1:A-:B-):FIA(-);FIB(-);FIC(-);FII(-);FIIK(1);FIIS(-);FIIY(-)	216159	52.5021	Klebsiella pneumoniae	Klebsiella pneumoniae (573)	Klebsiella (570)	Enterobacteriaceae (543)	Enterobacterales (91347)	Gammaproteobacteria (1236)	Proteobacteria (1224)	Bacteria (2)	6.01167	7.92784
NZ_CP014073.1	0.0816138	0	99	578	circular	2018-03-04	USA:VA	USA,VA	37.1232	-78.4928	urine	Homo sapiens		IncFII(K)_1, CP000648, |IncFIB(K)_1, JN233704,	IncF RST(K1:A-:B-):FIA(-);FIB(-);FIC(-);FII(-);FIIK(1);FIIS(-);FIIY(-)	151998	51.9974	Klebsiella quasipneumoniae	Klebsiella quasipneumoniae (1463165)	Klebsiella (570)	Enterobacteriaceae (543)	Enterobacterales (91347)	Gammaproteobacteria (1236)	Proteobacteria (1224)	Bacteria (2)	5.57187	7.61627
NZ_MF150122.1	0.0820539	0	98	579	circular	2020-06-03	Brazil: City of Sao Paulo, State of Sao Paulo	Brazil,City of Sao Paulo,State of Sao Paulo	-22	-49	urine	Homo sapiens	single cell	IncHI1B(pNDM-MAR)_1, JN420336, |IncFIB(pNDM-Mar)_1, JN420336,	IncHI1 MLST(-):HCM1_043(-);HCM1_064(-);HCM1_099(-);HCM1_116(-);HCM1_178ac(-);HCM1_259(-);(-)|IncF RST(F-:A-:B-):FIA(-);FIB(-);FIC(-);FII(-);FIIK(-);FIIS(-);FIIY(-)	205089	44.6518	Klebsiella pneumoniae	Klebsiella pneumoniae (573)	Klebsiella (570)	Enterobacteriaceae (543)	Enterobacterales (91347)	Gammaproteobacteria (1236)	Proteobacteria (1224)	Bacteria (2)	15.6788	-0.110534
NZ_MK413723.1	0.0820539	0	98	580	circular	2020-06-04								IncHI1B(pNDM-MAR)_1, JN420336, |IncFIB(pNDM-Mar)_1, JN420336,	IncHI1 MLST(-):HCM1_043(-);HCM1_064(-);HCM1_099(-);HCM1_116(-);HCM1_178ac(-);HCM1_259(-);(-)|IncF RST(F-:A-:B-):FIA(-);FIB(-);FIC(-);FII(-);FIIK(-);FIIS(-);FIIY(-)	269204	46.4819	Klebsiella pneumoniae	Klebsiella pneumoniae (573)	Klebsiella (570)	Enterobacteriaceae (543)	Enterobacterales (91347)	Gammaproteobacteria (1236)	Proteobacteria (1224)	Bacteria (2)	15.6889	-0.0224367
NZ_CP025683.1	0.0820539	0	98	581	circular	2019-01-16	South Korea: Seoul	South Korea,Seoul	37.5667	126.978	Korean infant feces		cell culture	IncFIB(K)_1, JN233704,	IncF RST(F-:A-:B-):FIA(-);FIB(-);FIC(-);FII(-);FIIK(-);FIIS(-);FIIY(-)	139211	51.6554	Klebsiella pneumoniae	Klebsiella pneumoniae (573)	Klebsiella (570)	Enterobacteriaceae (543)	Enterobacterales (91347)	Gammaproteobacteria (1236)	Proteobacteria (1224)	Bacteria (2)	5.50172	7.51968
NZ_AP019401.1	0.0820539	0	98	582	circular	2020-04-18	Japan:Osaka	Japan,Osaka	34.6938	135.501		Homo sapiens		IncFII(K)_1, CP000648, |IncFIB(K)_1, JN233704,	IncF RST(F-:A-:B-):FIA(-);FIB(-);FIC(-);FII(-);FIIK(~6);FIIS(-);FIIY(-)	181837	51.5649	Klebsiella pneumoniae	Klebsiella pneumoniae (573)	Klebsiella (570)	Enterobacteriaceae (543)	Enterobacterales (91347)	Gammaproteobacteria (1236)	Proteobacteria (1224)	Bacteria (2)	5.66669	7.26309
CP028781.2	0.0820539	0	98	583	circular	2018-04-05	China: Yibin, Sichuan	China,Yibin,Sichuan	28.7989	104.729		Homo sapiens	Culture	IncFIB(K)_1, JN233704, |IncX3_1, JN247852,	IncF RST(F-:A-:B-):FIA(-);FIB(-);FIC(-);FII(-);FIIK(-);FIIS(-);FIIY(-)	159311	51.0662	Klebsiella pneumoniae subsp. pneumoniae	Klebsiella pneumoniae (573)	Klebsiella (570)	Enterobacteriaceae (543)	Enterobacterales (91347)	Gammaproteobacteria (1236)	Proteobacteria (1224)	Bacteria (2)	6.13415	7.91407
CP052236.1	0.0820539	0	98	584	circular	2020-05-04	South Korea: Jeonnam		34.87	126.99	blood	Homo sapiens		IncHI1B(pNDM-MAR)_1, JN420336,	IncHI1 MLST(-):HCM1_043(-);HCM1_064(-);HCM1_099(-);HCM1_116(-);HCM1_178ac(-);HCM1_259(-);(-)	330799	47.4082	Klebsiella pneumoniae	Klebsiella pneumoniae (573)	Klebsiella (570)	Enterobacteriaceae (543)	Enterobacterales (91347)	Gammaproteobacteria (1236)	Proteobacteria (1224)	Bacteria (2)	15.6422	-0.0667315
NZ_CP008842.1	0.0820539	0	98	585	circular	2015-01-21	South Korea: Maripo beach		36.78	126.14	soil		missing	IncFII(pKP91)_1, CP000966,	IncF RST(K17:A-:B-):FIA(-);FIB(-);FIC(-);FII(-);FIIK(17);FIIS(-);FIIY(10?)	204468	52.0463	Klebsiella michiganensis	Klebsiella michiganensis (1134687)	Klebsiella (570)	Enterobacteriaceae (543)	Enterobacterales (91347)	Gammaproteobacteria (1236)	Proteobacteria (1224)	Bacteria (2)	5.55796	7.70382
NZ_CP031580.1	0.0820539	0	98	586	linear	2019-02-08	Missing				Rectal swab	Homo sapiens				86800	46.5933	Klebsiella pneumoniae	Klebsiella pneumoniae (573)	Klebsiella (570)	Enterobacteriaceae (543)	Enterobacterales (91347)	Gammaproteobacteria (1236)	Proteobacteria (1224)	Bacteria (2)	15.6478	-0.0728124
LR890459.1	0.0820539	0	98	587	circular	2020-10-30								IncFIB(K)(pCAV1099-114)_1, CP011596,	IncF RST(F-:A-:B-):FIA(-);FIB(-);FIC(-);FII(-);FIIK(-);FIIS(-);FIIY(-)	243662	51.7931	Klebsiella pneumoniae	Klebsiella pneumoniae (573)	Klebsiella (570)	Enterobacteriaceae (543)	Enterobacterales (91347)	Gammaproteobacteria (1236)	Proteobacteria (1224)	Bacteria (2)	5.2236	7.84988
LR890439.1	0.0820539	0	98	588	circular	2020-10-30								IncFIB(K)_1, JN233704, |IncFII(K)_1, CP000648,	IncF RST(K7:A-:B-):FIA(-);FIB(-);FIC(-);FII(-);FIIK(7);FIIS(-);FIIY(-)	211329	52.9265	Klebsiella pneumoniae	Klebsiella pneumoniae (573)	Klebsiella (570)	Enterobacteriaceae (543)	Enterobacterales (91347)	Gammaproteobacteria (1236)	Proteobacteria (1224)	Bacteria (2)	5.66896	7.20814
NZ_CP041084.1	0.0820539	0	98	589	circular	2019-06-28	not applicable				not applicable	not applicable		IncFIB(K)_1, JN233704,	IncF RST(F-:A-:B-):FIA(-);FIB(-);FIC(-);FII(-);FIIK(-);FIIS(-);FIIY(-)	158439	52.1387	Klebsiella pneumoniae	Klebsiella pneumoniae (573)	Klebsiella (570)	Enterobacteriaceae (543)	Enterobacterales (91347)	Gammaproteobacteria (1236)	Proteobacteria (1224)	Bacteria (2)	6.10474	7.903
NZ_CP026049.1	0.0824989	0	97	590	circular	2018-01-18	USA	USA	39.7837	-100.446	G-tube swab	Homo sapiens		IncFII(pKP91)_1, CP000966,	IncF RST(K17:A-:B-):FIA(-);FIB(-);FIC(-);FII(-);FIIK(17);FIIS(-);FIIY(10?)	206855	52.5179	Raoultella planticola	Raoultella planticola (575)	Raoultella (160674)	Enterobacteriaceae (543)	Enterobacterales (91347)	Gammaproteobacteria (1236)	Proteobacteria (1224)	Bacteria (2)	5.52329	7.65578
NZ_CP018351.1	0.0824989	0	97	591	circular	2018-02-15	USA:Virginia		38.14	-78.45	Urine/Genitourinary	Homo sapiens		IncFII(K)_1, CP000648, |IncFIB(K)_1, JN233704,	IncF RST(K1:A-:B-):FIA(-);FIB(-);FIC(-);FII(-);FIIK(1);FIIS(-);FIIY(-)	184940	52.4549	Klebsiella pneumoniae	Klebsiella pneumoniae (573)	Klebsiella (570)	Enterobacteriaceae (543)	Enterobacterales (91347)	Gammaproteobacteria (1236)	Proteobacteria (1224)	Bacteria (2)	6.05822	7.87076
NZ_CP026716.1	0.0824989	0	97	592	circular	2018-03-02	missing				missing	missing		IncFII(K)_1, CP000648, |IncFIB(K)_1, JN233704,	IncF RST(K2:A-:B-):FIA(-);FIB(-);FIC(-);FII(-);FIIK(2);FIIS(-);FIIY(-)	189585	51.1396	Klebsiella oxytoca	Klebsiella oxytoca (571)	Klebsiella (570)	Enterobacteriaceae (543)	Enterobacterales (91347)	Gammaproteobacteria (1236)	Proteobacteria (1224)	Bacteria (2)	5.71715	8.09216
NZ_CP033798.1	0.0824989	0	97	593	circular	2018-11-26	not applicable				Rectal swab	Homo sapiens		IncFII(pECLA)_1, CP001919, |IncFIA(HI1)_1, AF250878,	IncF RST(F-:A-:B-):FIA(-);FIB(-);FIC(-);FII(-);FIIK(-);FIIS(-);FIIY(-)	103835	50.821	Enterobacter roggenkampii	Enterobacter roggenkampii (1812935)	Enterobacter (547)	Enterobacteriaceae (543)	Enterobacterales (91347)	Gammaproteobacteria (1236)	Proteobacteria (1224)	Bacteria (2)	4.9471	7.15776
NZ_MT560061.1	0.0824989	0	97	594	circular	2020-11-17								IncFIB(K)_1, JN233704, |IncFII(K)_1, CP000648,	IncF RST(K8:A-:B-):FIA(-);FIB(-);FIC(-);FII(-);FIIK(8);FIIS(-);FIIY(-)	200297	51.5155	Klebsiella pneumoniae	Klebsiella pneumoniae (573)	Klebsiella (570)	Enterobacteriaceae (543)	Enterobacterales (91347)	Gammaproteobacteria (1236)	Proteobacteria (1224)	Bacteria (2)	5.9977	7.89147
NZ_MT560080.1	0.0824989	0	97	595	circular	2020-11-17								IncFIB(K)_1, JN233704, |IncFII(K)_1, CP000648,	IncF RST(K8:A-:B-):FIA(-);FIB(-);FIC(-);FII(-);FIIK(8);FIIS(-);FIIY(-)	200152	51.5283	Klebsiella pneumoniae	Klebsiella pneumoniae (573)	Klebsiella (570)	Enterobacteriaceae (543)	Enterobacterales (91347)	Gammaproteobacteria (1236)	Proteobacteria (1224)	Bacteria (2)	5.95183	7.9081
NZ_CP014776.1	0.0829489	0	96	596	circular	2020-04-20	Malaysia	Malaysia	4.08921	100.563	Fish ball		missing	IncFIB(pNDM-Mar)_1, JN420336,	IncF RST(F-:A-:B-):FIA(-);FIB(-);FIC(-);FII(-);FIIK(-);FIIS(-);FIIY(-)	242312	45.0023	Pluralibacter gergoviae	Pluralibacter gergoviae (61647)	Pluralibacter (1330546)	Enterobacteriaceae (543)	Enterobacterales (91347)	Gammaproteobacteria (1236)	Proteobacteria (1224)	Bacteria (2)	15.6532	-0.0810641
NZ_MN268580.1	0.0829489	0	96	597	circular	2020-06-04								Col(pHAD28)_1, KU674895, |IncFIB(K)_1, JN233704,	IncF RST(F-:A-:B-):FIA(-);FIB(-);FIC(-);FII(-);FIIK(-);FIIS(-);FIIY(-)	181383	52.0975	Klebsiella pneumoniae	Klebsiella pneumoniae (573)	Klebsiella (570)	Enterobacteriaceae (543)	Enterobacterales (91347)	Gammaproteobacteria (1236)	Proteobacteria (1224)	Bacteria (2)	6.50469	7.72165
NZ_CP054734.1	0.0829489	0	96	598	circular	2020-06-18	China: Hunan		27.72	112	sputum	Homo sapiens		IncR_1, DQ449578, |IncFII(pHN7A8)_1, JN232517,	IncF RST(F33:A-:B-):FIA(-);FIB(-);FIC(5?);FII(33);FIIK(-);FIIS(-);FIIY(-)	123177	53.6123	Klebsiella pneumoniae	Klebsiella pneumoniae (573)	Klebsiella (570)	Enterobacteriaceae (543)	Enterobacterales (91347)	Gammaproteobacteria (1236)	Proteobacteria (1224)	Bacteria (2)	5.92427	3.06745
NZ_CP015383.1	0.0829489	0	96	599	circular	2017-01-19	USA: New York	USA,New York	40.7309	-73.9872		Homo sapiens		IncFIB(K)_1, JN233704, |IncFII(K)_1, CP000648,	IncF RST(K7:A-:B-):FIA(-);FIB(-);FIC(-);FII(-);FIIK(7);FIIS(-);FIIY(-)	182846	51.5888	Klebsiella pneumoniae	Klebsiella pneumoniae (573)	Klebsiella (570)	Enterobacteriaceae (543)	Enterobacterales (91347)	Gammaproteobacteria (1236)	Proteobacteria (1224)	Bacteria (2)	5.85964	8.42068
NZ_AP019405.1	0.0829489	0	96	600	circular	2020-04-18	Japan:Osaka	Japan,Osaka	34.6938	135.501		Homo sapiens		IncFII(K)_1, CP000648, |IncN_1, AY046276, |IncFIB(K)_1, JN233704,	IncF RST(K5:A-:B-):FIA(-);FIB(-);FIC(-);FII(-);FIIK(5);FIIS(-);FIIY(-)|IncN MLST(5):repN(2);traJ(3);korA(2)	250392	51.6602	Klebsiella pneumoniae	Klebsiella pneumoniae (573)	Klebsiella (570)	Enterobacteriaceae (543)	Enterobacterales (91347)	Gammaproteobacteria (1236)	Proteobacteria (1224)	Bacteria (2)	5.75659	7.25663
NZ_CP020109.1	0.0829489	0	96	601	circular	2017-03-23	missing				missing	missing		IncFIB(K)_1, JN233704, |IncFII(K)_1, CP000648,	IncF RST(K1:A-:B-):FIA(-);FIB(-);FIC(-);FII(-);FIIK(1);FIIS(-);FIIY(-)	169952	52.6966	Klebsiella pneumoniae	Klebsiella pneumoniae (573)	Klebsiella (570)	Enterobacteriaceae (543)	Enterobacterales (91347)	Gammaproteobacteria (1236)	Proteobacteria (1224)	Bacteria (2)	6.05185	7.87717
NZ_CP057460.1	0.0829489	0	96	602	circular	2020-08-04	United Kingdom	United Kingdom	54.7024	-3.27658	Pooled cattle faecal samples collected from floor of farm		culture			256547	47.4007	Klebsiella pneumoniae	Klebsiella pneumoniae (573)	Klebsiella (570)	Enterobacteriaceae (543)	Enterobacterales (91347)	Gammaproteobacteria (1236)	Proteobacteria (1224)	Bacteria (2)	15.6398	-0.103527
NZ_CP026397.1	0.0829489	0	96	603	circular	2018-02-24	USA		38.9847	-77.0947				IncFII(K)_1, CP000648, |IncR_1, DQ449578,	IncF RST(K15:A-:B-):FIA(-);FIB(-);FIC(-);FII(-);FIIK(15);FIIS(-);FIIY(-)	220406	52.3538	Klebsiella pneumoniae	Klebsiella pneumoniae (573)	Klebsiella (570)	Enterobacteriaceae (543)	Enterobacterales (91347)	Gammaproteobacteria (1236)	Proteobacteria (1224)	Bacteria (2)	5.68542	7.2667
NZ_CP009879.1	0.0829489	0	96	604	circular	2015-01-21	USA	USA	39.7837	-100.446	urine		missing	IncFII(K)_1, CP000648, |IncFIB(K)_1, JN233704,	IncF RST(K7:A-:B-):FIA(-);FIB(-);FIC(-);FII(-);FIIK(7);FIIS(-);FIIY(-)	178563	51.5185	Klebsiella pneumoniae subsp. pneumoniae	Klebsiella pneumoniae (573)	Klebsiella (570)	Enterobacteriaceae (543)	Enterobacterales (91347)	Gammaproteobacteria (1236)	Proteobacteria (1224)	Bacteria (2)	5.84043	8.40261
NZ_MN310380.1	0.0834041	0	95	605	circular	2020-08-04								IncFIB(K)_1, JN233704, |IncFII(p14)_1, JQ418538, |IncFII(pCRY)_1, NC_005814,	IncF RST(F-:A-:B-):FIA(-);FIB(-);FIC(-);FII(-);FIIK(12?);FIIS(-);FIIY(-)	164851	52.1914	Raoultella ornithinolytica	Raoultella ornithinolytica (54291)	Raoultella (160674)	Enterobacteriaceae (543)	Enterobacterales (91347)	Gammaproteobacteria (1236)	Proteobacteria (1224)	Bacteria (2)	5.49729	7.26411
NZ_CP042546.1	0.0834041	0	95	606	circular	2019-10-13	Australia: Sydney	Australia,Sydney	-33.8548	151.216	clinical sample	Homo sapiens	Whole organism	IncFII(pKP91)_1, CP000966,	IncF RST(K17:A-:B-):FIA(-);FIB(-);FIC(-);FII(-);FIIK(17);FIIS(-);FIIY(10?)	195216	52.3384	Klebsiella michiganensis	Klebsiella michiganensis (1134687)	Klebsiella (570)	Enterobacteriaceae (543)	Enterobacterales (91347)	Gammaproteobacteria (1236)	Proteobacteria (1224)	Bacteria (2)	5.56968	7.67158
NZ_MN823999.1	0.0834041	0	95	607	circular	2020-08-04								IncFIB(K)_1, JN233704, |IncFII(K)_1, CP000648,	IncF RST(K1:A-:B-):FIA(-);FIB(-);FIC(-);FII(-);FIIK(1);FIIS(-);FIIY(-)	183189	53.3542	Klebsiella pneumoniae	Klebsiella pneumoniae (573)	Klebsiella (570)	Enterobacteriaceae (543)	Enterobacterales (91347)	Gammaproteobacteria (1236)	Proteobacteria (1224)	Bacteria (2)	6.08237	7.88274
NZ_MN423365.1	0.0834041	0	95	608	circular	2020-09-30								IncFIB(K)_1, JN233704, |pKP1433_1, JX397875,	IncF RST(F-:A-:B-):FIA(-);FIB(-);FIC(-);FII(-);FIIK(-);FIIS(-);FIIY(-)	130867	49.7291	Leclercia adecarboxylata	Leclercia adecarboxylata (83655)	Leclercia (83654)	Enterobacteriaceae (543)	Enterobacterales (91347)	Gammaproteobacteria (1236)	Proteobacteria (1224)	Bacteria (2)	5.29248	7.36712
LR890625.1	0.0834041	0	95	609	circular	2020-10-30								repB_KLEB_VIR, AP006726, |IncHI1B(pNDM-MAR)_1, JN420336,	IncHI1 MLST(-):HCM1_043(-);HCM1_064(-);HCM1_099(-);HCM1_116(-);HCM1_178ac(-);HCM1_259(-);(-)	233683	50.2578	Klebsiella pneumoniae	Klebsiella pneumoniae (573)	Klebsiella (570)	Enterobacteriaceae (543)	Enterobacterales (91347)	Gammaproteobacteria (1236)	Proteobacteria (1224)	Bacteria (2)	4.94067	7.55727
NZ_CP042513.1	0.0834041	0	95	610	circular	2019-10-13	Australia: Sydney	Australia,Sydney	-33.8548	151.216	Ensuite 7/8		Whole organism	IncFIB(K)_1, JN233704, |IncFII(K)_1, CP000648,	IncF RST(K2:A-:B-):FIA(-);FIB(-);FIC(-);FII(-);FIIK(2);FIIS(-);FIIY(-)	186249	51.9772	Serratia marcescens	Serratia marcescens (615)	Serratia (613)	Yersiniaceae (1903411)	Enterobacterales (91347)	Gammaproteobacteria (1236)	Proteobacteria (1224)	Bacteria (2)	5.67097	7.23803
CP052233.1	0.0834041	0	95	611	circular	2020-05-04	South Korea: Jeonnam		34.87	126.99	blood	Homo sapiens		IncFIB(pNDM-Mar)_1, JN420336,	IncF RST(F-:A-:B-):FIA(-);FIB(-);FIC(-);FII(-);FIIK(-);FIIS(-);FIIY(-)	215836	46.6368	Klebsiella pneumoniae	Klebsiella pneumoniae (573)	Klebsiella (570)	Enterobacteriaceae (543)	Enterobacterales (91347)	Gammaproteobacteria (1236)	Proteobacteria (1224)	Bacteria (2)	15.6441	-0.0993252
CP063866.1	0.0834041	0	95	612	circular	2020-11-08	China:Heyuan		23.73	114.7	Black-collared Starling			IncFIB(K)_1, JN233704,	IncF RST(F-:A-:B-):FIA(-);FIB(-);FIC(-);FII(-);FIIK(-);FIIS(-);FIIY(-)	150355	52.3534	Klebsiella pneumoniae	Klebsiella pneumoniae (573)	Klebsiella (570)	Enterobacteriaceae (543)	Enterobacterales (91347)	Gammaproteobacteria (1236)	Proteobacteria (1224)	Bacteria (2)	5.5187	7.48456
CP052325.1	0.0834041	0	95	613	circular	2020-05-04	South Korea: Jeonnam		34.87	126.99	blood	Homo sapiens		IncFIB(pNDM-Mar)_1, JN420336, |IncHI1B(pNDM-MAR)_1, JN420336,	IncF RST(F-:A-:B-):FIA(-);FIB(-);FIC(-);FII(-);FIIK(-);FIIS(-);FIIY(-)|IncHI1 MLST(-):HCM1_043(-);HCM1_064(-);HCM1_099(-);HCM1_116(-);HCM1_178ac(-);HCM1_259(-);(-)	212881	45.043	Klebsiella pneumoniae	Klebsiella pneumoniae (573)	Klebsiella (570)	Enterobacteriaceae (543)	Enterobacterales (91347)	Gammaproteobacteria (1236)	Proteobacteria (1224)	Bacteria (2)	15.65	-0.091
NZ_MG252894.1	0.0838645	0	94	614	circular	2020-06-03								IncFIB(K)_1, JN233704,	IncF RST(F-:A-:B-):FIA(-);FIB(-);FIC(-);FII(-);FIIK(-);FIIS(-);FIIY(-)	161324	52.0381	Klebsiella pneumoniae	Klebsiella pneumoniae (573)	Klebsiella (570)	Enterobacteriaceae (543)	Enterobacterales (91347)	Gammaproteobacteria (1236)	Proteobacteria (1224)	Bacteria (2)	6.17598	7.58006
NZ_CP054722.1	0.0838645	0	94	615	circular	2020-06-18	China: Hunan		27.72	112	telephone of Nurse station			IncR_1, DQ449578, |IncFII(pHN7A8)_1, JN232517,	IncF RST(F33:A-:B-):FIA(-);FIB(-);FIC(5?);FII(33);FIIK(-);FIIS(-);FIIY(-)	133772	53.3191	Klebsiella pneumoniae	Klebsiella pneumoniae (573)	Klebsiella (570)	Enterobacteriaceae (543)	Enterobacterales (91347)	Gammaproteobacteria (1236)	Proteobacteria (1224)	Bacteria (2)	5.95765	3.10173
NZ_CP054728.1	0.0838645	0	94	616	circular	2020-06-18	China: Hunan		27.72	112	sputum	Homo sapiens		IncR_1, DQ449578, |IncFII(pHN7A8)_1, JN232517,	IncF RST(F33:A-:B-):FIA(-);FIB(-);FIC(5?);FII(33);FIIK(-);FIIS(-);FIIY(-)	133772	53.3198	Klebsiella pneumoniae	Klebsiella pneumoniae (573)	Klebsiella (570)	Enterobacteriaceae (543)	Enterobacterales (91347)	Gammaproteobacteria (1236)	Proteobacteria (1224)	Bacteria (2)	5.96903	3.10822
NZ_CP054764.1	0.0838645	0	94	617	circular	2020-06-18	China: Hunan		27.69	111.66	sputum	Homo sapiens		IncR_1, DQ449578, |IncFII(pHN7A8)_1, JN232517,	IncF RST(F33:A-:B-):FIA(-);FIB(-);FIC(5?);FII(33);FIIK(-);FIIS(-);FIIY(-)	133772	53.3206	Klebsiella pneumoniae	Klebsiella pneumoniae (573)	Klebsiella (570)	Enterobacteriaceae (543)	Enterobacterales (91347)	Gammaproteobacteria (1236)	Proteobacteria (1224)	Bacteria (2)	5.94002	3.08257
CP052240.1	0.0838645	0	94	618	circular	2020-05-04	South Korea: Jeonnam		34.87	126.99	blood	Homo sapiens		IncFIB(pNDM-Mar)_1, JN420336, |IncHI1B(pNDM-MAR)_1, JN420336,	IncF RST(F-:A-:B-):FIA(-);FIB(-);FIC(-);FII(-);FIIK(-);FIIS(-);FIIY(-)|IncHI1 MLST(-):HCM1_043(-);HCM1_064(-);HCM1_099(-);HCM1_116(-);HCM1_178ac(-);HCM1_259(-);(-)	279075	46.8336	Klebsiella pneumoniae	Klebsiella pneumoniae (573)	Klebsiella (570)	Enterobacteriaceae (543)	Enterobacterales (91347)	Gammaproteobacteria (1236)	Proteobacteria (1224)	Bacteria (2)	15.6483	-0.0786619
NZ_CP018339.1	0.0838645	0	94	619	circular	2016-12-19	Germany: Goettingen		51.5392	9.91156	wound swab	Homo sapiens		IncFIB(pNDM-Mar)_1, JN420336,	IncF RST(F-:A-:B-):FIA(-);FIB(-);FIC(-);FII(-);FIIK(-);FIIS(-);FIIY(-)	204862	44.8194	Klebsiella pneumoniae	Klebsiella pneumoniae (573)	Klebsiella (570)	Enterobacteriaceae (543)	Enterobacterales (91347)	Gammaproteobacteria (1236)	Proteobacteria (1224)	Bacteria (2)	15.6433	-0.095779
NZ_CP054782.1	0.0838645	0	94	620	circular	2020-06-18	China: Hunan		27.69	111.66	sputum	Homo sapiens		IncR_1, DQ449578, |IncFII(pHN7A8)_1, JN232517,	IncF RST(F33:A-:B-):FIA(-);FIB(-);FIC(5?);FII(33);FIIK(-);FIIS(-);FIIY(-)	133771	53.3202	Klebsiella pneumoniae	Klebsiella pneumoniae (573)	Klebsiella (570)	Enterobacteriaceae (543)	Enterobacterales (91347)	Gammaproteobacteria (1236)	Proteobacteria (1224)	Bacteria (2)	5.9454	3.08781
NZ_CP029724.1	0.0838645	0	94	621	circular	2018-06-16	missing				missing	missing		IncFIB(K)_1, JN233704, |IncFII(K)_1, CP000648,	IncF RST(K2:A-:B-):FIA(-);FIB(-);FIC(-);FII(-);FIIK(2);FIIS(-);FIIY(-)	178561	51.3791	Klebsiella pneumoniae	Klebsiella pneumoniae (573)	Klebsiella (570)	Enterobacteriaceae (543)	Enterobacterales (91347)	Gammaproteobacteria (1236)	Proteobacteria (1224)	Bacteria (2)	5.79035	8.25393
NZ_CP036307.1	0.0838645	0	94	622	circular	2019-02-20	China: Chengdu, Sichuan	China,Chengdu,Sichuan	30.6428	104.068		Homo sapiens	Pure Culture	IncFIB(K)_1, JN233704, |IncFII(pKP91)_1, CP000966,	IncF RST(K9:A-:B-):FIA(-);FIB(-);FIC(-);FII(-);FIIK(9);FIIS(-);FIIY(-)	229483	51.4156	Klebsiella pneumoniae	Klebsiella pneumoniae (573)	Klebsiella (570)	Enterobacteriaceae (543)	Enterobacterales (91347)	Gammaproteobacteria (1236)	Proteobacteria (1224)	Bacteria (2)	5.61498	8.67945
NZ_CP031936.1	0.0838645	0	94	623	circular	2020-10-07	China	China	34.4118	86.0327		Homo sapiens	missing	IncFII(pHN7A8)_1, JN232517, |IncR_1, DQ449578,	IncF RST(F33:A-:B-):FIA(-);FIB(-);FIC(5?);FII(33);FIIK(-);FIIS(-);FIIY(-)	133770	53.3266	Klebsiella pneumoniae	Klebsiella pneumoniae (573)	Klebsiella (570)	Enterobacteriaceae (543)	Enterobacterales (91347)	Gammaproteobacteria (1236)	Proteobacteria (1224)	Bacteria (2)	5.94186	3.08732
LR890666.1	0.0838645	0	94	624	circular	2020-10-30								repB_KLEB_VIR, AP006726, |IncHI1B(pNDM-MAR)_1, JN420336,	IncHI1 MLST(-):HCM1_043(-);HCM1_064(-);HCM1_099(-);HCM1_116(-);HCM1_178ac(-);HCM1_259(-);(-)	235594	50.3111	Klebsiella pneumoniae	Klebsiella pneumoniae (573)	Klebsiella (570)	Enterobacteriaceae (543)	Enterobacterales (91347)	Gammaproteobacteria (1236)	Proteobacteria (1224)	Bacteria (2)	4.94416	7.54215
NZ_CP041375.1	0.0838645	0	94	625	circular	2019-10-07	China: Hangzhou	China,Hangzhou	30.249	120.205	urine	Homo sapiens		IncR_1, DQ449578, |IncFII(pHN7A8)_1, JN232517,	IncF RST(F33:A-:B-):FIA(-);FIB(-);FIC(5?);FII(33);FIIK(-);FIIS(-);FIIY(-)	134972	53.3288	Klebsiella pneumoniae	Klebsiella pneumoniae (573)	Klebsiella (570)	Enterobacteriaceae (543)	Enterobacterales (91347)	Gammaproteobacteria (1236)	Proteobacteria (1224)	Bacteria (2)	5.93895	3.08067
NZ_MN182746.1	0.0838645	0	94	626	circular	2020-09-24								IncFII(pHN7A8)_1, JN232517, |IncR_1, DQ449578,	IncF RST(F33:A-:B-):FIA(-);FIB(-);FIC(-);FII(33);FIIK(-);FIIS(-);FIIY(-)	133772	53.3266	Klebsiella pneumoniae	Klebsiella pneumoniae (573)	Klebsiella (570)	Enterobacteriaceae (543)	Enterobacterales (91347)	Gammaproteobacteria (1236)	Proteobacteria (1224)	Bacteria (2)	5.94034	3.08641
NZ_CP034201.1	0.0838645	0	94	627	circular	2019-06-28	United Kingdom		51.48	-0.22	blood	Homo sapiens		IncFIB(pNDM-Mar)_1, JN420336, |IncHI1B(pNDM-MAR)_1, JN420336,	IncF RST(F-:A-:B-):FIA(-);FIB(-);FIC(-);FII(-);FIIK(-);FIIS(-);FIIY(-)|IncHI1 MLST(-):HCM1_043(-);HCM1_064(-);HCM1_099(-);HCM1_116(-);HCM1_178ac(-);HCM1_259(-);(-)	372826	47.2558	Klebsiella pneumoniae subsp. pneumoniae	Klebsiella pneumoniae (573)	Klebsiella (570)	Enterobacteriaceae (543)	Enterobacterales (91347)	Gammaproteobacteria (1236)	Proteobacteria (1224)	Bacteria (2)	15.6846	-0.0180027
NC_023333.1	0.0838645	0	94	628	circular	2014-01-24								IncFIB(K)_1, JN233704, |IncFII(K)_1, CP000648,	IncF RST(K5:A-:B-):FIA(-);FIB(-);FIC(-);FII(-);FIIK(5);FIIS(-);FIIY(-)	246176	52.4324	Klebsiella pneumoniae	Klebsiella pneumoniae (573)	Klebsiella (570)	Enterobacteriaceae (543)	Enterobacterales (91347)	Gammaproteobacteria (1236)	Proteobacteria (1224)	Bacteria (2)	6.48363	7.68826
NZ_CP033956.1	0.0838645	0	94	629	circular	2019-06-29	China:Zhejiang		29.8	118.2	stool	Homo sapiens		IncR_1, DQ449578, |IncFII(pHN7A8)_1, JN232517,	IncF RST(F33:A-:B-):FIA(-);FIB(-);FIC(5?);FII(33);FIIK(-);FIIS(-);FIIY(-)	133772	53.3295	Klebsiella pneumoniae	Klebsiella pneumoniae (573)	Klebsiella (570)	Enterobacteriaceae (543)	Enterobacterales (91347)	Gammaproteobacteria (1236)	Proteobacteria (1224)	Bacteria (2)	5.94193	3.08962
NZ_MH733011.1	0.0843302	0	93	630	circular	2020-06-03								IncFIB(pNDM-Mar)_1, JN420336, |IncN_1, AY046276, |IncHI1B(pNDM-MAR)_1, JN420336,	IncF RST(F-:A-:B-):FIA(-);FIB(-);FIC(-);FII(-);FIIK(-);FIIS(-);FIIY(-)|IncN MLST(-):repN(4);traJ(-);korA(-)|IncHI1 MLST(-):HCM1_043(-);HCM1_064(-);HCM1_099(-);HCM1_116(-);HCM1_178ac(-);HCM1_259(-);(-)	313847	46.5303	Klebsiella pneumoniae	Klebsiella pneumoniae (573)	Klebsiella (570)	Enterobacteriaceae (543)	Enterobacterales (91347)	Gammaproteobacteria (1236)	Proteobacteria (1224)	Bacteria (2)	15.6475	-0.0743805
NZ_CP055317.1	0.0843302	0	93	631	linear	2020-07-30	United Kingdom	United Kingdom	54.7024	-3.27658	Freshwater sample from upstream of wastewater treatment plant		culture	IncFII(K)_1, CP000648, |IncFIB(K)_1, JN233704,	IncF RST(K5:A-:B-):FIA(-);FIB(-);FIC(-);FII(-);FIIK(5);FIIS(-);FIIY(-)	151589	51.9886	Klebsiella grimontii	Klebsiella grimontii (2058152)	Klebsiella (570)	Enterobacteriaceae (543)	Enterobacterales (91347)	Gammaproteobacteria (1236)	Proteobacteria (1224)	Bacteria (2)	6.18494	7.74879
CP052506.1	0.0843302	0	93	632	circular	2020-05-04	South Korea: Gyeonggi		37.66	126.77	blood	Homo sapiens		IncFIB(K)_1, JN233704, |IncFII(K)_1, CP000648,	IncF RST(K7:A-:B-):FIA(-);FIB(-);FIC(-);FII(-);FIIK(7);FIIS(-);FIIY(-)	192686	52.0022	Klebsiella pneumoniae	Klebsiella pneumoniae (573)	Klebsiella (570)	Enterobacteriaceae (543)	Enterobacterales (91347)	Gammaproteobacteria (1236)	Proteobacteria (1224)	Bacteria (2)	5.76407	8.36706
NZ_CP018460.1	0.0843302	0	93	633	circular	2016-12-19	Germany: Goettingen		51.5392	9.91156	tracheal secretion	Homo sapiens		IncFIB(K)_1, JN233704, |IncFII(K)_1, CP000648,	IncF RST(K1:A-:B-):FIA(-);FIB(-);FIC(-);FII(-);FIIK(1);FIIS(-);FIIY(-)	232181	50.6282	Klebsiella pneumoniae	Klebsiella pneumoniae (573)	Klebsiella (570)	Enterobacteriaceae (543)	Enterobacterales (91347)	Gammaproteobacteria (1236)	Proteobacteria (1224)	Bacteria (2)	6.04427	7.91819
CP052423.1	0.0843302	0	93	634	circular	2020-05-04	South Korea: Gangwon		37.82	128.16	blood	Homo sapiens		IncFIB(K)_1, JN233704, |IncFIB(pKPHS1)_1, CP003223,	IncF RST(F-:A-:B-):FIA(-);FIB(-);FIC(-);FII(-);FIIK(-);FIIS(-);FIIY(-)	242308	49.8952	Klebsiella pneumoniae	Klebsiella pneumoniae (573)	Klebsiella (570)	Enterobacteriaceae (543)	Enterobacterales (91347)	Gammaproteobacteria (1236)	Proteobacteria (1224)	Bacteria (2)	16.5068	10.9722
CP038004.1	0.0843302	0	93	635	circular	2019-03-15	China: Bazhong, Sichuan	China,Bazhong,Sichuan	31.859	106.755		Homo sapiens	Pure Culture	IncFIB(K)_1, JN233704, |IncFII(pKP91)_1, CP000966,	IncF RST(K9:A-:B-):FIA(-);FIB(-);FIC(-);FII(-);FIIK(9);FIIS(-);FIIY(-)	228706	51.4114	Klebsiella pneumoniae	Klebsiella pneumoniae (573)	Klebsiella (570)	Enterobacteriaceae (543)	Enterobacterales (91347)	Gammaproteobacteria (1236)	Proteobacteria (1224)	Bacteria (2)	5.62939	8.65488
CP052148.1	0.0843302	0	93	636	circular	2020-05-04	South Korea: Busan		35.18	129.08	blood	Homo sapiens		IncFIB(K)_1, JN233704, |IncFII(K)_1, CP000648,	IncF RST(K7:A-:B-):FIA(-);FIB(-);FIC(-);FII(-);FIIK(7);FIIS(-);FIIY(-)	192772	52.0065	Klebsiella pneumoniae	Klebsiella pneumoniae (573)	Klebsiella (570)	Enterobacteriaceae (543)	Enterobacterales (91347)	Gammaproteobacteria (1236)	Proteobacteria (1224)	Bacteria (2)	5.75853	8.36993
NZ_MT232812.1	0.0843302	0	93	637	circular	2020-08-04								IncR_1, DQ449578, |IncFII(pHN7A8)_1, JN232517,	IncF RST(F33:A-:B-):FIA(-);FIB(-);FIC(5?);FII(33);FIIK(-);FIIS(-);FIIY(-)	130717	53.2264	Klebsiella pneumoniae	Klebsiella pneumoniae (573)	Klebsiella (570)	Enterobacteriaceae (543)	Enterobacterales (91347)	Gammaproteobacteria (1236)	Proteobacteria (1224)	Bacteria (2)	5.94252	3.08302
NZ_CP053738.1	0.0843302	0	93	638	circular	2020-06-02	China: Sichuan	China,Sichuan	30.5	102.5	slaughterhouse	pig	cell culture	IncFIB(K)_1, JN233704, |IncFIA(HI1)_1, AF250878, |IncN_1, AY046276,	IncF RST(F-:A18:B-):FIA(18);FIB(-);FIC(-);FII(-);FIIK(-);FIIS(-);FIIY(-)|IncN MLST(-):repN(1);traJ(-);korA(-)	75733	52.6006	Escherichia coli	Escherichia coli (562)	Escherichia (561)	Enterobacteriaceae (543)	Enterobacterales (91347)	Gammaproteobacteria (1236)	Proteobacteria (1224)	Bacteria (2)	4.92225	5.08633
NZ_CP018675.1	0.0848014	0	92	639	circular	2018-02-15	USA:Virginia		38.14	-78.45	urine	Homo sapiens		IncFIB(K)_1, JN233704, |IncFII(K)_1, CP000648,	IncF RST(K1:A-:B-):FIA(-);FIB(-);FIC(-);FII(-);FIIK(1);FIIS(-);FIIY(-)	181436	52.9338	Klebsiella pneumoniae	Klebsiella pneumoniae (573)	Klebsiella (570)	Enterobacteriaceae (543)	Enterobacterales (91347)	Gammaproteobacteria (1236)	Proteobacteria (1224)	Bacteria (2)	6.09478	7.89334
NZ_KY495890.1	0.0848014	0	92	640	circular	2020-06-03								IncFII(K)_1, CP000648, |IncFIB(K)_1, JN233704,	IncF RST(K7:A-:B-):FIA(-);FIB(-);FIC(-);FII(-);FIIK(7);FIIS(-);FIIY(-)	147442	50.7773	Klebsiella pneumoniae	Klebsiella pneumoniae (573)	Klebsiella (570)	Enterobacteriaceae (543)	Enterobacterales (91347)	Gammaproteobacteria (1236)	Proteobacteria (1224)	Bacteria (2)	5.85249	8.38616
NZ_MK191024.1	0.0848014	0	92	641	circular	2020-06-03								IncFIB(pNDM-Mar)_1, JN420336, |IncHI1B(pNDM-MAR)_1, JN420336,	IncF RST(F-:A-:B-):FIA(-);FIB(-);FIC(-);FII(-);FIIK(-);FIIS(-);FIIY(-)|IncHI1 MLST(-):HCM1_043(-);HCM1_064(-);HCM1_099(-);HCM1_116(-);HCM1_178ac(-);HCM1_259(-);(-)	290451	46.9098	Klebsiella pneumoniae	Klebsiella pneumoniae (573)	Klebsiella (570)	Enterobacteriaceae (543)	Enterobacterales (91347)	Gammaproteobacteria (1236)	Proteobacteria (1224)	Bacteria (2)	15.6529	-0.0626648
CP052538.1	0.0848014	0	92	642	circular	2020-05-04	South Korea: Gyeonggi		37.66	126.77	blood	Homo sapiens		IncFIB(K)_1, JN233704, |IncFIA(HI1)_1, AF250878, |IncFII(pKP91)_1, CP000966, |IncFII(K)_1, CP000648,	IncF RST(K-:A-:B-):FIA(~21);FIB(-);FIC(-);FII(-);FIIK(4,7);FIIS(-);FIIY(-)	308167	51.7781	Klebsiella pneumoniae	Klebsiella pneumoniae (573)	Klebsiella (570)	Enterobacteriaceae (543)	Enterobacterales (91347)	Gammaproteobacteria (1236)	Proteobacteria (1224)	Bacteria (2)	5.8321	8.34264
NZ_CP047337.1	0.0848014	0	92	643	circular	2020-03-04	China: Sichuan province		30.41	104.11	a feces sample of chicken origin			IncFIB(K)_1, JN233704, |IncFII(pKP91)_1, CP000966, |IncFIA(HI1)_1, AF250878, |IncFII(K)_1, CP000648,	IncF RST(K-:A-:B-):FIA(~21);FIB(-);FIC(-);FII(-);FIIK(1,7);FIIS(-);FIIY(-)	345655	52.2793	Klebsiella pneumoniae	Klebsiella pneumoniae (573)	Klebsiella (570)	Enterobacteriaceae (543)	Enterobacterales (91347)	Gammaproteobacteria (1236)	Proteobacteria (1224)	Bacteria (2)	6.02648	7.89659
LR890699.1	0.0848014	0	92	644	circular	2020-10-30								IncFIB(K)(pCAV1099-114)_1, CP011596, |IncFII(pKP91)_1, CP000966, |IncFIA(HI1)_1, AF250878,	IncF RST(K17:A-:B-):FIA(21?);FIB(-);FIC(-);FII(-);FIIK(17);FIIS(-);FIIY(10?)	196764	52.3876	Klebsiella pneumoniae	Klebsiella pneumoniae (573)	Klebsiella (570)	Enterobacteriaceae (543)	Enterobacterales (91347)	Gammaproteobacteria (1236)	Proteobacteria (1224)	Bacteria (2)	5.47414	7.64019
NZ_CP034282.1	0.0848014	0	92	645	circular	2018-12-13	not applicable				not applicable	not applicable		IncFIB(K)_1, JN233704, |IncFII(K)_1, CP000648,	IncF RST(K7:A-:B-):FIA(-);FIB(-);FIC(-);FII(-);FIIK(7);FIIS(-);FIIY(-)	193222	52.0096	Klebsiella pneumoniae	Klebsiella pneumoniae (573)	Klebsiella (570)	Enterobacteriaceae (543)	Enterobacterales (91347)	Gammaproteobacteria (1236)	Proteobacteria (1224)	Bacteria (2)	5.76338	8.36478
NZ_CP011600.1	0.0848014	0	92	646	circular	2015-06-10	USA:Virginia		38.14	-78.45	Perirectal	Homo sapiens		FII(pBK30683)_1, KF954760, |IncFII(pCRY)_1, NC_005814, |IncFIB(K)_1, JN233704,	IncF RST(F-:A-:B-):FIA(-);FIB(-);FIC(-);FII(-);FIIK(-);FIIS(-);FIIY(-)	215092	53.0931	Phytobacter ursingii	Phytobacter ursingii (1972431)	Phytobacter (447792)	Enterobacteriaceae (543)	Enterobacterales (91347)	Gammaproteobacteria (1236)	Proteobacteria (1224)	Bacteria (2)	5.35316	7.34055
NZ_CP061386.1	0.0852783	0	91	647	circular	2020-09-11	USA: Chicago, IL		41.8945	-87.6208	unknown	Homo sapiens		IncFIB(K)_1, JN233704, |IncX3_1, JN247852,	IncF RST(F-:A-:B-):FIA(-);FIB(-);FIC(-);FII(-);FIIK(-);FIIS(-);FIIY(-)	186866	51.3486	Klebsiella pneumoniae	Klebsiella pneumoniae (573)	Klebsiella (570)	Enterobacteriaceae (543)	Enterobacterales (91347)	Gammaproteobacteria (1236)	Proteobacteria (1224)	Bacteria (2)	6.07754	7.90846
NZ_CP022923.1	0.0852783	0	91	648	circular	2018-10-04	South Korea: Seoul		37.56	126.98	sputum	Homo sapiens		IncFIB(pQil)_1, JN233705, |IncFII(K)_1, CP000648, |IncFIB(K)_1, JN233704,	IncF RST(K2:A-:B-):FIA(-);FIB(-);FIC(-);FII(-);FIIK(2);FIIS(-);FIIY(-)	246577	52.9798	Klebsiella pneumoniae	Klebsiella pneumoniae (573)	Klebsiella (570)	Enterobacteriaceae (543)	Enterobacterales (91347)	Gammaproteobacteria (1236)	Proteobacteria (1224)	Bacteria (2)	5.85012	8.31111
NZ_CP042975.1	0.0852783	0	91	649	circular	2020-04-10	China: Anhui	China,Anhui	32	117	blood	Homo sapiens	single cell	repB_KLEB_VIR, AP006726, |IncHI1B(pNDM-MAR)_1, JN420336,	IncHI1 MLST(-):HCM1_043(-);HCM1_064(-);HCM1_099(-);HCM1_116(-);HCM1_178ac(-);HCM1_259(-);(-)	270776	50.9369	Klebsiella pneumoniae	Klebsiella pneumoniae (573)	Klebsiella (570)	Enterobacteriaceae (543)	Enterobacterales (91347)	Gammaproteobacteria (1236)	Proteobacteria (1224)	Bacteria (2)	15.265	1.03609
NZ_AP022006.1	0.0852783	0	91	650	circular	2020-08-13	Japan:Tokyo		35.6684	139.428				IncFIA(HI1)_1, AF250878,	IncF RST(F-:A10:B-):FIA(10);FIB(-);FIC(-);FII(-);FIIK(-);FIIS(-);FIIY(-)	143641	52.084	Klebsiella quasipneumoniae	Klebsiella quasipneumoniae (1463165)	Klebsiella (570)	Enterobacteriaceae (543)	Enterobacterales (91347)	Gammaproteobacteria (1236)	Proteobacteria (1224)	Bacteria (2)	5.62072	7.30218
NZ_CP022917.1	0.0852783	0	91	651	circular	2018-10-04	South Korea: Seoul		37.57	126.98	Rectal swab	Homo sapiens		IncFIB(pQil)_1, JN233705, |IncFII(K)_1, CP000648, |IncFIB(K)_1, JN233704,	IncF RST(K2:A-:B-):FIA(-);FIB(-);FIC(-);FII(-);FIIK(2);FIIS(-);FIIY(-)	246577	52.9798	Klebsiella pneumoniae	Klebsiella pneumoniae (573)	Klebsiella (570)	Enterobacteriaceae (543)	Enterobacterales (91347)	Gammaproteobacteria (1236)	Proteobacteria (1224)	Bacteria (2)	5.81079	8.33215
NZ_CP024551.1	0.0852783	0	91	652	circular	2017-11-08	not collected				not collected	not collected		IncFIB(K)_1, JN233704, |IncFII(K)_1, CP000648,	IncF RST(K1:A-:B-):FIA(-);FIB(-);FIC(-);FII(-);FIIK(1);FIIS(-);FIIY(-)	147932	52.2808	Klebsiella pneumoniae	Klebsiella pneumoniae (573)	Klebsiella (570)	Enterobacteriaceae (543)	Enterobacterales (91347)	Gammaproteobacteria (1236)	Proteobacteria (1224)	Bacteria (2)	6.06205	7.88244
NZ_CP024537.1	0.0852783	0	91	653	circular	2017-11-09	not collected				not collected	not collected		IncFIB(K)_1, JN233704, |IncFII(K)_1, CP000648,	IncF RST(K1:A-:B-):FIA(-);FIB(-);FIC(-);FII(-);FIIK(1);FIIS(-);FIIY(-)	147932	52.2821	Klebsiella pneumoniae	Klebsiella pneumoniae (573)	Klebsiella (570)	Enterobacteriaceae (543)	Enterobacterales (91347)	Gammaproteobacteria (1236)	Proteobacteria (1224)	Bacteria (2)	6.03446	7.86862
NZ_CP032180.1	0.0852783	0	91	654	circular	2018-09-19	missing				missing	missing		IncFIA(HI1)_1, AF250878,	IncF RST(F-:A-:B-):FIA(-);FIB(-);FIC(-);FII(-);FIIK(-);FIIS(-);FIIY(-)	137578	51.2219	Citrobacter freundii	Citrobacter freundii (546)	Citrobacter (544)	Enterobacteriaceae (543)	Enterobacterales (91347)	Gammaproteobacteria (1236)	Proteobacteria (1224)	Bacteria (2)	5.21319	7.37596
NZ_MN182750.1	0.0852783	0	91	655	circular	2020-09-24								IncFII(K)_1, CP000648, |repB_KLEB_VIR, AP006726, |IncHI1B(pNDM-MAR)_1, JN420336, |IncFIA(HI1)_1, AF250878,	IncF RST(K3:A-:B-):FIA(~21);FIB(-);FIC(-);FII(-);FIIK(3);FIIS(-);FIIY(-)|IncHI1 MLST(-):HCM1_043(-);HCM1_064(-);HCM1_099(-);HCM1_116(-);HCM1_178ac(-);HCM1_259(-);(-)	265165	49.1735	Escherichia coli	Escherichia coli (562)	Escherichia (561)	Enterobacteriaceae (543)	Enterobacterales (91347)	Gammaproteobacteria (1236)	Proteobacteria (1224)	Bacteria (2)	4.80446	8.7034
NZ_AP018757.1	0.0852783	0	91	656	circular	2018-12-11	Japan	Japan	36.5748	139.239		Homo sapiens		IncFIB(K)_1, JN233704, |FII(pBK30683)_1, KF954760,	IncF RST(F-:A-:B-):FIA(-);FIB(-);FIC(-);FII(-);FIIK(-);FIIS(-);FIIY(-)	224544	52.762	Metakosakonia sp. MRY16-398	Metakosakonia sp. MRY16-398 (2487150)	Metakosakonia (2055876)	Enterobacteriaceae (543)	Enterobacterales (91347)	Gammaproteobacteria (1236)	Proteobacteria (1224)	Bacteria (2)	5.39574	7.32978
NZ_CP041093.1	0.0852783	0	91	657	circular	2019-06-19	Thailand: Nakhon Pathom		13.8199	100.062		Swine		IncFIB(pNDM-Mar)_1, JN420336, |IncHI1B(pNDM-MAR)_1, JN420336,	IncF RST(F-:A-:B-):FIA(-);FIB(-);FIC(-);FII(-);FIIK(-);FIIS(-);FIIY(-)|IncHI1 MLST(-):HCM1_043(-);HCM1_064(-);HCM1_099(-);HCM1_116(-);HCM1_178ac(-);HCM1_259(-);(-)	250990	45.7273	Klebsiella pneumoniae subsp. pneumoniae	Klebsiella pneumoniae (573)	Klebsiella (570)	Enterobacteriaceae (543)	Enterobacterales (91347)	Gammaproteobacteria (1236)	Proteobacteria (1224)	Bacteria (2)	15.6518	-0.0752594
NZ_CP022920.1	0.0852783	0	91	658	circular	2018-10-04	South Korea: Seoul		37.57	126.98	sputum	Homo sapiens		IncFII(K)_1, CP000648, |IncFIB(pQil)_1, JN233705, |IncFIB(K)_1, JN233704,	IncF RST(K2:A-:B-):FIA(-);FIB(-);FIC(-);FII(-);FIIK(2);FIIS(-);FIIY(-)	246577	52.9798	Klebsiella pneumoniae	Klebsiella pneumoniae (573)	Klebsiella (570)	Enterobacteriaceae (543)	Enterobacterales (91347)	Gammaproteobacteria (1236)	Proteobacteria (1224)	Bacteria (2)	5.81586	8.3347
NZ_CP024193.1	0.0852783	0	91	659	circular	2017-11-05	Australia: Melbourne		-37.8457	144.982	rectal swab	Homo sapiens		IncFIB(K)_1, JN233704, |IncFII(K)_1, CP000648,	IncF RST(K1:A-:B-):FIA(-);FIB(-);FIC(-);FII(-);FIIK(1);FIIS(-);FIIY(-)	147945	52.2802	Klebsiella pneumoniae	Klebsiella pneumoniae (573)	Klebsiella (570)	Enterobacteriaceae (543)	Enterobacterales (91347)	Gammaproteobacteria (1236)	Proteobacteria (1224)	Bacteria (2)	6.06521	7.88803
NZ_CP025142.1	0.0852783	0	91	660	circular	2017-12-14	USA: New York City	USA,New York City	40.7309	-73.9872	Pancreatic Fluid	Homo sapiens		IncFIB(K)_1, JN233704,	IncF RST(F-:A-:B-):FIA(-);FIB(-);FIC(-);FII(-);FIIK(-);FIIS(-);FIIY(-)	152230	52.8746	Klebsiella pneumoniae	Klebsiella pneumoniae (573)	Klebsiella (570)	Enterobacteriaceae (543)	Enterobacterales (91347)	Gammaproteobacteria (1236)	Proteobacteria (1224)	Bacteria (2)	6.10464	7.80032
NZ_CP050841.1	0.0852783	0	91	661	circular	2020-04-09	China: Shandong		35.14	115.26	milk			IncFII(pKP91)_1, CP000966, |IncFIB(K)_1, JN233704,	IncF RST(K27:A-:B-):FIA(-);FIB(-);FIC(-);FII(-);FIIK(27);FIIS(-);FIIY(-)	97812	49.3845	Klebsiella pneumoniae	Klebsiella pneumoniae (573)	Klebsiella (570)	Enterobacteriaceae (543)	Enterobacterales (91347)	Gammaproteobacteria (1236)	Proteobacteria (1224)	Bacteria (2)	5.54463	7.70502
MK649823.1	0.0857608	0	90	662	circular	2019-10-12								IncFIB(pQil)_1, JN233705, |IncFII(K)_1, CP000648,	IncF RST(K5:A-:B-):FIA(-);FIB(-);FIC(-);FII(-);FIIK(5);FIIS(-);FIIY(-)	226590	51.4948	Klebsiella pneumoniae	Klebsiella pneumoniae (573)	Klebsiella (570)	Enterobacteriaceae (543)	Enterobacterales (91347)	Gammaproteobacteria (1236)	Proteobacteria (1224)	Bacteria (2)	6.15654	6.57126
CP056413.1	0.0857608	0	90	663	circular	2020-07-27	United Kingdom	United Kingdom	54.7024	-3.27658	Wastewater effluent sample		culture	IncFIB(K)_1, JN233704, |IncFII_1, AY458016,	IncF RST(F100:A-:B-):FIA(-);FIB(-);FIC(-);FII(100);FIIK(-);FIIS(-);FIIY(-)	187726	52.1553	Escherichia coli	Escherichia coli (562)	Escherichia (561)	Enterobacteriaceae (543)	Enterobacterales (91347)	Gammaproteobacteria (1236)	Proteobacteria (1224)	Bacteria (2)	4.86897	6.32896
NZ_CP025148.1	0.0857608	0	90	664	circular	2017-12-14	USA: New York City	USA,New York City	40.7309	-73.9872	blood	Homo sapiens		IncFIB(K)_1, JN233704,	IncF RST(F-:A-:B-):FIA(-);FIB(-);FIC(-);FII(-);FIIK(-);FIIS(-);FIIY(-)	161986	53.4065	Klebsiella pneumoniae	Klebsiella pneumoniae (573)	Klebsiella (570)	Enterobacteriaceae (543)	Enterobacterales (91347)	Gammaproteobacteria (1236)	Proteobacteria (1224)	Bacteria (2)	6.14715	7.96474
NZ_CP061397.1	0.0857608	0	90	665	circular	2020-09-11	USA: Chicago, IL		41.8945	-87.6208	unknown	Homo sapiens		IncFIB(K)_1, JN233704, |IncFII(K)_1, CP000648,	IncF RST(K1:A-:B-):FIA(-);FIB(-);FIC(-);FII(-);FIIK(1);FIIS(-);FIIY(-)	177258	53.0893	Klebsiella pneumoniae	Klebsiella pneumoniae (573)	Klebsiella (570)	Enterobacteriaceae (543)	Enterobacterales (91347)	Gammaproteobacteria (1236)	Proteobacteria (1224)	Bacteria (2)	5.90111	7.83452
NZ_CP041629.1	0.0857608	0	90	666	circular	2020-01-24	China: Henan	China,Henan	34	114		pig	faecal sample	IncFIB(K)_1, JN233704, |IncFIA(HI1)_1, AF250878,	IncF RST(F-:A18:B-):FIA(18);FIB(-);FIC(-);FII(-);FIIK(-);FIIS(-);FIIY(-)	98476	52.3914	Escherichia coli	Escherichia coli (562)	Escherichia (561)	Enterobacteriaceae (543)	Enterobacterales (91347)	Gammaproteobacteria (1236)	Proteobacteria (1224)	Bacteria (2)	4.96929	5.14141
CP056582.1	0.0857608	0	90	667	circular	2020-07-27	United Kingdom	United Kingdom	54.7024	-3.27658	Wastewater influent sample		culture	IncFIB(K)_1, JN233704, |IncFII(pKP91)_1, CP000966,	IncF RST(K28:A-:B-):FIA(-);FIB(-);FIC(-);FII(-);FIIK(28);FIIS(-);FIIY(10?)	187988	51.898	Klebsiella oxytoca	Klebsiella oxytoca (571)	Klebsiella (570)	Enterobacteriaceae (543)	Enterobacterales (91347)	Gammaproteobacteria (1236)	Proteobacteria (1224)	Bacteria (2)	5.52538	7.50639
NC_020132.1	0.0857608	0	90	668	circular	2013-01-15								IncFIB(K)_1, JN233704, |IncFII(K)_1, CP000648,	IncF RST(K1:A-:B-):FIA(-);FIB(-);FIC(-);FII(-);FIIK(1);FIIS(-);FIIY(-)	165295	52.7191	Klebsiella pneumoniae	Klebsiella pneumoniae (573)	Klebsiella (570)	Enterobacteriaceae (543)	Enterobacterales (91347)	Gammaproteobacteria (1236)	Proteobacteria (1224)	Bacteria (2)	6.05852	7.87975
CP052263.1	0.0857608	0	90	669	circular	2020-05-04	South Korea: Jeonnam		34.87	126.99	blood	Homo sapiens		IncFIB(K)_1, JN233704, |IncFII(K)_1, CP000648,	IncF RST(K7:A-:B-):FIA(-);FIB(-);FIC(-);FII(-);FIIK(7);FIIS(-);FIIY(-)	180646	51.8594	Klebsiella pneumoniae	Klebsiella pneumoniae (573)	Klebsiella (570)	Enterobacteriaceae (543)	Enterobacterales (91347)	Gammaproteobacteria (1236)	Proteobacteria (1224)	Bacteria (2)	5.82727	8.39941
NZ_CP050343.1	0.0857608	0	90	670	circular	2020-11-05	China		39.98	116.43	bronchoalveolar lavage	Homo sapiens		IncFIB(K)_1, JN233704, |IncFII(pKP91)_1, CP000966,	IncF RST(K9:A-:B-):FIA(-);FIB(-);FIC(-);FII(-);FIIK(9);FIIS(-);FIIY(-)	205940	51.0207	Klebsiella pneumoniae	Klebsiella pneumoniae (573)	Klebsiella (570)	Enterobacteriaceae (543)	Enterobacterales (91347)	Gammaproteobacteria (1236)	Proteobacteria (1224)	Bacteria (2)	5.62063	8.64971
NZ_CP046382.1	0.0857608	0	90	671	circular	2019-12-11	Bangladesh: Dhaka	Bangladesh,Dhaka	23.7594	90.3788		Homo sapiens	Pure culture one microbial species	IncFIB(K)_1, JN233704, |IncFII(pHN7A8)_1, JN232517, |IncFII(K)_1, CP000648,	IncF RST(K7:A-:B-):FIA(-);FIB(-);FIC(-);FII(-);FIIK(7,7);FIIS(-);FIIY(-)	204070	51.6093	Klebsiella pneumoniae	Klebsiella pneumoniae (573)	Klebsiella (570)	Enterobacteriaceae (543)	Enterobacterales (91347)	Gammaproteobacteria (1236)	Proteobacteria (1224)	Bacteria (2)	5.87928	8.36711
NZ_CP024130.1	0.0857608	0	90	672	circular	2018-01-11	China	China	34.4118	86.0327	clinical patient		whole organism	IncFIB(K)_1, JN233704, |IncFIA(HI1)_1, AF250878,	IncF RST(F-:A18:B-):FIA(18);FIB(-);FIC(-);FII(-);FIIK(-);FIIS(-);FIIY(-)	88460	51.4877	Escherichia coli	Escherichia coli (562)	Escherichia (561)	Enterobacteriaceae (543)	Enterobacterales (91347)	Gammaproteobacteria (1236)	Proteobacteria (1224)	Bacteria (2)	4.93329	5.07675
NZ_CP006927.1	0.0857608	0	90	673	circular	2015-01-21								IncFIB(K)_1, JN233704, |IncFII(K)_1, CP000648,	IncF RST(K1:A-:B-):FIA(-);FIB(-);FIC(-);FII(-);FIIK(1);FIIS(-);FIIY(-)	142788	51.7761	Klebsiella pneumoniae 30660/NJST258_1	Klebsiella pneumoniae (573)	Klebsiella (570)	Enterobacteriaceae (543)	Enterobacterales (91347)	Gammaproteobacteria (1236)	Proteobacteria (1224)	Bacteria (2)	6.04239	7.86097
NZ_CP046950.1	0.0857608	0	90	674	circular	2020-01-02	Bangladesh: Dhaka	Bangladesh,Dhaka	23.7594	90.3788		Homo sapiens	Pure culture one microbial species	IncFIB(K)_1, JN233704, |IncFII(pHN7A8)_1, JN232517, |IncFII(K)_1, CP000648,	IncF RST(K7:A-:B-):FIA(-);FIB(-);FIC(-);FII(-);FIIK(7,7);FIIS(-);FIIY(-)	204047	51.5915	Klebsiella pneumoniae	Klebsiella pneumoniae (573)	Klebsiella (570)	Enterobacteriaceae (543)	Enterobacterales (91347)	Gammaproteobacteria (1236)	Proteobacteria (1224)	Bacteria (2)	5.83601	8.38452
NZ_CP056884.1	0.0862491	0	89	675	circular	2020-08-03	United Kingdom	United Kingdom	54.7024	-3.27658	Wastewater influent sample		culture	IncFIB(K)_1, JN233704, |IncFII(pKP91)_1, CP000966,	IncF RST(K9:A-:B-):FIA(-);FIB(-);FIC(-);FII(-);FIIK(9);FIIS(-);FIIY(-)	198658	52.6166	Klebsiella pneumoniae	Klebsiella pneumoniae (573)	Klebsiella (570)	Enterobacteriaceae (543)	Enterobacterales (91347)	Gammaproteobacteria (1236)	Proteobacteria (1224)	Bacteria (2)	6.43013	7.71747
NZ_LT009688.1	0.0862491	0	89	676	circular	2016-06-07								IncFIB(K)_1, JN233704, |IncFII(K)_1, CP000648,	IncF RST(K2:A-:B-):FIA(-);FIB(-);FIC(-);FII(-);FIIK(2);FIIS(-);FIIY(-)	166484	52.8321	Klebsiella pneumoniae	Klebsiella pneumoniae (573)	Klebsiella (570)	Enterobacteriaceae (543)	Enterobacterales (91347)	Gammaproteobacteria (1236)	Proteobacteria (1224)	Bacteria (2)	6.09402	7.94766
NZ_CP056879.1	0.0862491	0	89	677	circular	2020-08-03	United Kingdom	United Kingdom	54.7024	-3.27658	Wastewater influent sample		culture	IncFIB(K)_1, JN233704, |IncFII(pKP91)_1, CP000966,	IncF RST(K9:A-:B-):FIA(-);FIB(-);FIC(-);FII(-);FIIK(9);FIIS(-);FIIY(-)	199477	52.6903	Klebsiella pneumoniae	Klebsiella pneumoniae (573)	Klebsiella (570)	Enterobacteriaceae (543)	Enterobacterales (91347)	Gammaproteobacteria (1236)	Proteobacteria (1224)	Bacteria (2)	6.47307	7.72295
NZ_CP018361.1	0.0862491	0	89	678	circular	2017-02-03	USA:Virginia		38.14	-78.45	Perirectal	Homo sapiens		FIA(pBK30683)_1, KF954760, |IncFII(p14)_1, JQ418538, |IncFIB(K)_1, JN233704,	IncF RST(F-:A-:B-):FIA(~21);FIB(-);FIC(-);FII(-);FIIK(12?);FIIS(-);FIIY(-)	277616	53.1587	Klebsiella oxytoca	Klebsiella oxytoca (571)	Klebsiella (570)	Enterobacteriaceae (543)	Enterobacterales (91347)	Gammaproteobacteria (1236)	Proteobacteria (1224)	Bacteria (2)	5.48015	7.23481
NZ_CP032915.1	0.0862491	0	89	679	circular	2019-02-15	China:Wenzhou	China,Wenzhou	28.0153	120.656			single culture	IncHI1B(pNDM-MAR)_1, JN420336, |IncFIB(K)(pCAV1099-114)_1, CP011596,	IncHI1 MLST(-):HCM1_043(-);HCM1_064(-);HCM1_099(-);HCM1_116(-);HCM1_178ac(-);HCM1_259(-);(-)|IncF RST(F-:A-:B-):FIA(-);FIB(-);FIC(-);FII(-);FIIK(-);FIIS(-);FIIY(-)	208740	52.6291	Enterobacter roggenkampii	Enterobacter roggenkampii (1812935)	Enterobacter (547)	Enterobacteriaceae (543)	Enterobacterales (91347)	Gammaproteobacteria (1236)	Proteobacteria (1224)	Bacteria (2)	5.18793	7.84291
NZ_CP040894.1	0.0862491	0	89	680	circular	2019-06-22	China: Hangzhou	China,Hangzhou	30.249	120.205	stool	Homo sapiens	cell culture	pKP1433_1, JX397875,		75205	50.5778	Leclercia adecarboxylata	Leclercia adecarboxylata (83655)	Leclercia (83654)	Enterobacteriaceae (543)	Enterobacterales (91347)	Gammaproteobacteria (1236)	Proteobacteria (1224)	Bacteria (2)	5.21585	7.38298
NZ_CP061833.1	0.0862491	0	89	681	circular	2020-09-29	Chile	Chile	-31.7613	-71.3188	blood	Homo sapiens		IncFIB(K)_1, JN233704, |IncFII(K)_1, CP000648,	IncF RST(K7:A-:B-):FIA(-);FIB(-);FIC(-);FII(-);FIIK(7);FIIS(-);FIIY(-)	193300	51.6327	Klebsiella pneumoniae	Klebsiella pneumoniae (573)	Klebsiella (570)	Enterobacteriaceae (543)	Enterobacterales (91347)	Gammaproteobacteria (1236)	Proteobacteria (1224)	Bacteria (2)	5.83691	8.40876
CP052176.1	0.0862491	0	89	682	circular	2020-05-04	South Korea: Busan		35.18	129.08	blood	Homo sapiens		IncFIB(K)_1, JN233704, |IncFII(K)_1, CP000648,	IncF RST(K7:A-:B-):FIA(-);FIB(-);FIC(-);FII(-);FIIK(7);FIIS(-);FIIY(-)	217996	51.8532	Klebsiella pneumoniae	Klebsiella pneumoniae (573)	Klebsiella (570)	Enterobacteriaceae (543)	Enterobacterales (91347)	Gammaproteobacteria (1236)	Proteobacteria (1224)	Bacteria (2)	5.7393	8.41784
NZ_CP014649.1	0.0862491	0	89	683	circular	2016-06-23	USA		38.9847	-77.0947				IncFIB(K)_1, JN233704,	IncF RST(F-:A-:B-):FIA(-);FIB(-);FIC(-);FII(-);FIIK(-);FIIS(-);FIIY(-)	133484	52.5014	Klebsiella pneumoniae	Klebsiella pneumoniae (573)	Klebsiella (570)	Enterobacteriaceae (543)	Enterobacterales (91347)	Gammaproteobacteria (1236)	Proteobacteria (1224)	Bacteria (2)	5.99696	7.9046
NZ_CP054286.1	0.0862491	0	89	684	circular	2020-08-13	USA:Maine		45	-69	Rectal swab	Homo sapiens		IncFIB(K)_1, JN233704,	IncF RST(F-:A-:B-):FIA(-);FIB(-);FIC(-);FII(-);FIIK(-);FIIS(-);FIIY(-)	176330	51.863	Klebsiella pneumoniae	Klebsiella pneumoniae (573)	Klebsiella (570)	Enterobacteriaceae (543)	Enterobacterales (91347)	Gammaproteobacteria (1236)	Proteobacteria (1224)	Bacteria (2)	5.84036	7.76156
NZ_MH909329.1	0.0867434	0	88	685	circular	2020-06-03								IncFII(pECLA)_1, CP001919,	IncF RST(F-:A-:B-):FIA(-);FIB(-);FIC(-);FII(-);FIIK(-);FIIS(-);FIIY(-)	120182	51.4245	Leclercia adecarboxylata	Leclercia adecarboxylata (83655)	Leclercia (83654)	Enterobacteriaceae (543)	Enterobacterales (91347)	Gammaproteobacteria (1236)	Proteobacteria (1224)	Bacteria (2)	5.20366	7.38324
NZ_CP011623.1	0.0867434	0	88	686	circular	2015-06-18	USA:Virginia		38.14	-78.45	urine	Homo sapiens		IncFIB(K)_1, JN233704, |IncFII(K)_1, CP000648,	IncF RST(K15:A-:B-):FIA(-);FIB(-);FIC(-);FII(-);FIIK(15);FIIS(-);FIIY(-)	250396	52.6654	Klebsiella pneumoniae	Klebsiella pneumoniae (573)	Klebsiella (570)	Enterobacteriaceae (543)	Enterobacterales (91347)	Gammaproteobacteria (1236)	Proteobacteria (1224)	Bacteria (2)	5.73673	7.25675
NZ_CP050349.1	0.0867434	0	88	687	circular	2020-11-05	China		39.98	116.43	sputum	Homo sapiens		IncFIB(K)_1, JN233704, |IncFII(pKP91)_1, CP000966,	IncF RST(K9:A-:B-):FIA(-);FIB(-);FIC(-);FII(-);FIIK(9);FIIS(-);FIIY(-)	220761	51.3501	Klebsiella pneumoniae	Klebsiella pneumoniae (573)	Klebsiella (570)	Enterobacteriaceae (543)	Enterobacterales (91347)	Gammaproteobacteria (1236)	Proteobacteria (1224)	Bacteria (2)	5.64016	8.66636
CP052214.1	0.0867434	0	88	688	circular	2020-05-04	South Korea: Jeonnam		34.87	126.99	blood	Homo sapiens		IncFIB(K)_1, JN233704, |IncFII(K)_1, CP000648,	IncF RST(K7:A-:B-):FIA(-);FIB(-);FIC(-);FII(-);FIIK(7);FIIS(-);FIIY(-)	186907	51.5781	Klebsiella pneumoniae	Klebsiella pneumoniae (573)	Klebsiella (570)	Enterobacteriaceae (543)	Enterobacterales (91347)	Gammaproteobacteria (1236)	Proteobacteria (1224)	Bacteria (2)	5.82849	8.3946
NZ_CP011641.1	0.0867434	0	88	689	circular	2015-06-18	USA:Virginia		38.14	-78.45	respiratory	Homo sapiens		IncFII(K)_1, CP000648, |IncFII(pCRY)_1, NC_005814, |IncFIB(K)_1, JN233704,	IncF RST(K5:A-:B-):FIA(-);FIB(-);FIC(-);FII(-);FIIK(5);FIIS(-);FIIY(-)	199444	51.1266	Serratia marcescens	Serratia marcescens (615)	Serratia (613)	Yersiniaceae (1903411)	Enterobacterales (91347)	Gammaproteobacteria (1236)	Proteobacteria (1224)	Bacteria (2)	5.53421	7.2334
NZ_CP056685.1	0.0867434	0	88	690	circular	2020-08-03	United Kingdom	United Kingdom	54.7024	-3.27658	Wastewater influent sample		culture	FIA(pBK30683)_1, KF954760, |IncFII(pKP91)_1, CP000966,	IncF RST(K4:A-:B-):FIA(21?);FIB(-);FIC(-);FII(-);FIIK(4);FIIS(-);FIIY(-)	128344	52.0429	Klebsiella grimontii	Klebsiella grimontii (2058152)	Klebsiella (570)	Enterobacteriaceae (543)	Enterobacterales (91347)	Gammaproteobacteria (1236)	Proteobacteria (1224)	Bacteria (2)	5.98465	7.04226
NZ_CP056149.1	0.0867434	0	88	691	circular	2020-08-03	United Kingdom	United Kingdom	54.7024	-3.27658	Wastewater effluent sample		culture	IncFII(pECLA)_1, CP001919, |IncFIB(pECLA)_1, CP001919,	IncF RST(F-:A-:B-):FIA(-);FIB(-);FIC(-);FII(-);FIIK(-);FIIS(-);FIIY(-)	142158	51.0094	Enterobacter roggenkampii	Enterobacter roggenkampii (1812935)	Enterobacter (547)	Enterobacteriaceae (543)	Enterobacterales (91347)	Gammaproteobacteria (1236)	Proteobacteria (1224)	Bacteria (2)	5.00181	7.18643
CP052298.1	0.0867434	0	88	692	circular	2020-05-04	South Korea: Jeonnam		34.87	126.99	blood	Homo sapiens		IncFIB(K)_1, JN233704, |IncFII(K)_1, CP000648,	IncF RST(K7:A-:B-):FIA(-);FIB(-);FIC(-);FII(-);FIIK(7);FIIS(-);FIIY(-)	195752	51.7103	Klebsiella pneumoniae	Klebsiella pneumoniae (573)	Klebsiella (570)	Enterobacteriaceae (543)	Enterobacterales (91347)	Gammaproteobacteria (1236)	Proteobacteria (1224)	Bacteria (2)	5.8116	8.39065
CP052276.1	0.0867434	0	88	693	circular	2020-05-04	South Korea: Jeonnam		34.87	126.99	blood	Homo sapiens		IncFIB(K)_1, JN233704, |IncFII(K)_1, CP000648,	IncF RST(K7:A-:B-):FIA(-);FIB(-);FIC(-);FII(-);FIIK(7);FIIS(-);FIIY(-)	193678	51.7059	Klebsiella pneumoniae	Klebsiella pneumoniae (573)	Klebsiella (570)	Enterobacteriaceae (543)	Enterobacterales (91347)	Gammaproteobacteria (1236)	Proteobacteria (1224)	Bacteria (2)	5.81207	8.38925
CP044386.1	0.0867434	0	88	694	circular	2019-12-11	Taiwan	Taiwan	23.5983	120.835	missing	Homo sapiens		IncHI1B(pNDM-MAR)_1, JN420336, |IncN_1, AY046276, |IncFIB(pNDM-Mar)_1, JN420336,	IncHI1 MLST(-):HCM1_043(-);HCM1_064(-);HCM1_099(-);HCM1_116(-);HCM1_178ac(-);HCM1_259(-);(-)|IncN MLST(-):repN(1);traJ(-);korA(-)|IncF RST(F-:A-:B-):FIA(-);FIB(-);FIC(-);FII(-);FIIK(-);FIIS(-);FIIY(-)	317839	46.7715	Klebsiella pneumoniae	Klebsiella pneumoniae (573)	Klebsiella (570)	Enterobacteriaceae (543)	Enterobacterales (91347)	Gammaproteobacteria (1236)	Proteobacteria (1224)	Bacteria (2)	15.6469	-0.0785793
NZ_CP040726.1	0.0867434	0	88	695	circular	2019-06-07	United Kingdom		51.38	-0.18	rectal swab	Homo sapiens		IncHI1B(pNDM-MAR)_1, JN420336, |IncFIB(pNDM-Mar)_1, JN420336,	IncHI1 MLST(-):HCM1_043(-);HCM1_064(-);HCM1_099(-);HCM1_116(-);HCM1_178ac(-);HCM1_259(-);(-)|IncF RST(F-:A-:B-):FIA(-);FIB(-);FIC(-);FII(-);FIIK(-);FIIS(-);FIIY(-)	339117	46.8299	Klebsiella pneumoniae	Klebsiella pneumoniae (573)	Klebsiella (570)	Enterobacteriaceae (543)	Enterobacterales (91347)	Gammaproteobacteria (1236)	Proteobacteria (1224)	Bacteria (2)	15.6314	-0.0734007
NZ_CP022926.1	0.0867434	0	88	696	circular	2018-10-04	South Korea: Seoul		37.57	126.98	sputum	Homo sapiens		IncFIB(K)_1, JN233704, |IncFIB(pQil)_1, JN233705, |IncFII(K)_1, CP000648,	IncF RST(K2:A-:B-):FIA(-);FIB(-);FIC(-);FII(-);FIIK(2);FIIS(-);FIIY(-)	258210	52.9352	Klebsiella pneumoniae	Klebsiella pneumoniae (573)	Klebsiella (570)	Enterobacteriaceae (543)	Enterobacterales (91347)	Gammaproteobacteria (1236)	Proteobacteria (1224)	Bacteria (2)	5.78419	8.33491
NZ_KT896504.1	0.0867434	0	88	697	circular	2020-06-29								IncFII(K)_1, CP000648, |IncFIB(K)_1, JN233704,	IncF RST(K7:A-:B-):FIA(-);FIB(-);FIC(-);FII(-);FIIK(7);FIIS(-);FIIY(-)	186474	51.4828	Klebsiella pneumoniae	Klebsiella pneumoniae (573)	Klebsiella (570)	Enterobacteriaceae (543)	Enterobacterales (91347)	Gammaproteobacteria (1236)	Proteobacteria (1224)	Bacteria (2)	5.8403	8.4159
NZ_CP039809.1	0.0867434	0	88	698	circular	2020-02-07	China:Beijing	China,Beijing	39.906	116.391	pus	Homo sapiens	culture	IncFIB(K)_1, JN233704, |IncFII(K)_1, CP000648,	IncF RST(K5:A-:B-):FIA(-);FIB(-);FIC(-);FII(-);FIIK(5);FIIS(-);FIIY(-)	205652	52.6117	Klebsiella pneumoniae	Klebsiella pneumoniae (573)	Klebsiella (570)	Enterobacteriaceae (543)	Enterobacterales (91347)	Gammaproteobacteria (1236)	Proteobacteria (1224)	Bacteria (2)	6.55456	7.66086
NZ_CP033402.1	0.0867434	0	88	699	circular	2018-11-08	China: Chengdu, Sichuan	China,Chengdu,Sichuan	30.6428	104.068		Homo sapiens	Pure Culture	IncFIB(K)_1, JN233704, |IncFII(K)_1, CP000648,	IncF RST(K5:A-:B-):FIA(-);FIB(-);FIC(-);FII(-);FIIK(5);FIIS(-);FIIY(-)	208288	52.5657	Klebsiella pneumoniae	Klebsiella pneumoniae (573)	Klebsiella (570)	Enterobacteriaceae (543)	Enterobacterales (91347)	Gammaproteobacteria (1236)	Proteobacteria (1224)	Bacteria (2)	6.53481	7.66988
NZ_CP060751.1	0.0867434	0	88	700	circular	2020-09-03	China:Shanghai		31.22	121.46	bile	Homo sapiens		IncFIB(K)_1, JN233704, |IncFIA(HI1)_1, AF250878, |IncN_1, AY046276,	IncF RST(F-:A18:B-):FIA(18);FIB(-);FIC(-);FII(-);FIIK(-);FIIS(-);FIIY(-)|IncN MLST(-):repN(1);traJ(-);korA(-)	93922	51.4736	Escherichia coli	Escherichia coli (562)	Escherichia (561)	Enterobacteriaceae (543)	Enterobacterales (91347)	Gammaproteobacteria (1236)	Proteobacteria (1224)	Bacteria (2)	4.92067	5.08506
NZ_CP036302.1	0.0867434	0	88	701	circular	2019-02-20	China: Sichuan, Chengdu	China,Sichuan,Chengdu	30.6766	104.061		Homo sapiens	Culture	IncFIB(K)_1, JN233704, |IncFII(K)_1, CP000648,	IncF RST(K5:A-:B-):FIA(-);FIB(-);FIC(-);FII(-);FIIK(5);FIIS(-);FIIY(-)	205652	52.6107	Klebsiella pneumoniae subsp. pneumoniae	Klebsiella pneumoniae (573)	Klebsiella (570)	Enterobacteriaceae (543)	Enterobacterales (91347)	Gammaproteobacteria (1236)	Proteobacteria (1224)	Bacteria (2)	6.52789	7.66882
NZ_CP025145.1	0.0872439	0	87	702	circular	2017-12-14	USA: New York City	USA,New York City	40.7309	-73.9872	bronchoalveolar lavage	Homo sapiens		IncFIB(K)_1, JN233704,	IncF RST(F-:A-:B-):FIA(-);FIB(-);FIC(-);FII(-);FIIK(-);FIIS(-);FIIY(-)	149158	52.9425	Klebsiella pneumoniae	Klebsiella pneumoniae (573)	Klebsiella (570)	Enterobacteriaceae (543)	Enterobacterales (91347)	Gammaproteobacteria (1236)	Proteobacteria (1224)	Bacteria (2)	6.05321	7.89539
NZ_CP025009.1	0.0872439	0	87	703	circular	2017-12-08	Australia: Victoria		-37.81	144.96	urine	Homo sapiens		IncFIB(K)_1, JN233704, |ColRNAI_1, DQ298019, |IncFII(K)_1, CP000648,	IncF RST(K2:A-:B-):FIA(-);FIB(-);FIC(-);FII(-);FIIK(2);FIIS(-);FIIY(-)	176049	52.9137	Klebsiella pneumoniae	Klebsiella pneumoniae (573)	Klebsiella (570)	Enterobacteriaceae (543)	Enterobacterales (91347)	Gammaproteobacteria (1236)	Proteobacteria (1224)	Bacteria (2)	6.07919	7.8796
NZ_CP027049.1	0.0872439	0	87	704	circular	2018-12-06	Greece: Athens		38.03	23.79	stool	Homo sapiens		IncFIB(K)_1, JN233704, |IncFII(K)_1, CP000648,	IncF RST(K2:A-:B-):FIA(-);FIB(-);FIC(-);FII(-);FIIK(2);FIIS(-);FIIY(-)	170467	52.7287	Klebsiella pneumoniae	Klebsiella pneumoniae (573)	Klebsiella (570)	Enterobacteriaceae (543)	Enterobacterales (91347)	Gammaproteobacteria (1236)	Proteobacteria (1224)	Bacteria (2)	6.09485	7.85443
NZ_CP056692.1	0.0872439	0	87	705	circular	2020-08-03	United Kingdom	United Kingdom	54.7024	-3.27658	Wastewater influent sample		culture	IncFII(pECLA)_1, CP001919, |IncFIB(pECLA)_1, CP001919,	IncF RST(F-:A-:B-):FIA(-);FIB(-);FIC(-);FII(-);FIIK(-);FIIS(-);FIIY(-)	109281	53.033	Enterobacter hormaechei	Enterobacter hormaechei (158836)	Enterobacter (547)	Enterobacteriaceae (543)	Enterobacterales (91347)	Gammaproteobacteria (1236)	Proteobacteria (1224)	Bacteria (2)	5.0046	7.20393
NZ_CP022574.1	0.0872439	0	87	706	circular	2017-08-10	France: Kremlin-Bicetre	France,Kremlin-Bicetre	48.8089	2.35683		Homo sapiens	rectal swab	IncFII(K)_1, CP000648, |IncFIB(K)_1, JN233704,	IncF RST(K2:A-:B-):FIA(-);FIB(-);FIC(-);FII(-);FIIK(2);FIIS(-);FIIY(-)	170415	52.7272	Klebsiella pneumoniae	Klebsiella pneumoniae (573)	Klebsiella (570)	Enterobacteriaceae (543)	Enterobacterales (91347)	Gammaproteobacteria (1236)	Proteobacteria (1224)	Bacteria (2)	6.06749	7.88537
NZ_CP050380.1	0.0872439	0	87	707	circular	2020-04-01	Czech Republic: Prague		50.07	14.43	Rectal swab	Homo sapiens		IncHI1B(pNDM-MAR)_1, JN420336, |IncFIB(pNDM-Mar)_1, JN420336,	IncHI1 MLST(-):HCM1_043(-);HCM1_064(-);HCM1_099(-);HCM1_116(-);HCM1_178ac(-);HCM1_259(-);(-)|IncF RST(F-:A-:B-):FIA(-);FIB(-);FIC(-);FII(-);FIIK(-);FIIS(-);FIIY(-)	353810	47.0238	Klebsiella pneumoniae	Klebsiella pneumoniae (573)	Klebsiella (570)	Enterobacteriaceae (543)	Enterobacterales (91347)	Gammaproteobacteria (1236)	Proteobacteria (1224)	Bacteria (2)	15.6299	-0.0245631
CP052288.1	0.0872439	0	87	708	circular	2020-05-04	South Korea: Jeonnam		34.87	126.99	blood	Homo sapiens		IncFIB(K)_1, JN233704, |IncFII(K)_1, CP000648,	IncF RST(K21:A-:B-):FIA(-);FIB(-);FIC(-);FII(-);FIIK(21);FIIS(-);FIIY(-)	181124	50.376	Klebsiella pneumoniae	Klebsiella pneumoniae (573)	Klebsiella (570)	Enterobacteriaceae (543)	Enterobacterales (91347)	Gammaproteobacteria (1236)	Proteobacteria (1224)	Bacteria (2)	5.83969	8.40861
NZ_CP022149.1	0.0872439	0	87	709	circular	2017-07-03	Switzerland:Basel	Switzerland,Basel	47.5581	7.58783	wastewater		water	IncFII(pECLA)_1, CP001919, |IncFIB(pECLA)_1, CP001919,	IncF RST(F-:A-:B-):FIA(-);FIB(-);FIC(-);FII(-);FIIK(-);FIIS(-);FIIY(-)	111184	50.9237	Enterobacter roggenkampii	Enterobacter roggenkampii (1812935)	Enterobacter (547)	Enterobacteriaceae (543)	Enterobacterales (91347)	Gammaproteobacteria (1236)	Proteobacteria (1224)	Bacteria (2)	5.04387	7.2034
NZ_CP040123.1	0.0872439	0	87	710	circular	2020-01-23	China	China	34.4118	86.0327	sputum	Homo sapiens		IncFIB(K)_1, JN233704, |IncR_1, DQ449578,	IncF RST(F-:A-:B-):FIA(-);FIB(-);FIC(-);FII(-);FIIK(-);FIIS(-);FIIY(-)	227415	52.7186	Klebsiella pneumoniae	Klebsiella pneumoniae (573)	Klebsiella (570)	Enterobacteriaceae (543)	Enterobacterales (91347)	Gammaproteobacteria (1236)	Proteobacteria (1224)	Bacteria (2)	6.22155	7.53441
NZ_MG252895.1	0.0877506	0	86	711	circular	2020-06-03								IncC_1, JN157804, |IncR_1, DQ449578,		300958	51.6251	Escherichia coli	Escherichia coli (562)	Escherichia (561)	Enterobacteriaceae (543)	Enterobacterales (91347)	Gammaproteobacteria (1236)	Proteobacteria (1224)	Bacteria (2)	1.39631	9.60066
CP052307.1	0.0877506	0	86	712	circular	2020-05-04	South Korea: Jeonnam		34.87	126.99	blood	Homo sapiens		IncFIB(K)_1, JN233704, |IncFII(K)_1, CP000648,	IncF RST(K7:A-:B-):FIA(-);FIB(-);FIC(-);FII(-);FIIK(7);FIIS(-);FIIY(-)	193527	51.6481	Klebsiella pneumoniae	Klebsiella pneumoniae (573)	Klebsiella (570)	Enterobacteriaceae (543)	Enterobacterales (91347)	Gammaproteobacteria (1236)	Proteobacteria (1224)	Bacteria (2)	5.82707	8.4137
NZ_CP025006.1	0.0877506	0	86	713	circular	2017-12-08	Australia: Victoria		-37.81	144.96	Sacral swab	Homo sapiens		IncFIB(K)_1, JN233704, |IncFII(K)_1, CP000648,	IncF RST(K2:A-:B-):FIA(-);FIB(-);FIC(-);FII(-);FIIK(2);FIIS(-);FIIY(-)	167373	52.9882	Klebsiella pneumoniae	Klebsiella pneumoniae (573)	Klebsiella (570)	Enterobacteriaceae (543)	Enterobacterales (91347)	Gammaproteobacteria (1236)	Proteobacteria (1224)	Bacteria (2)	6.10596	7.92841
NZ_CP029441.1	0.0877506	0	86	714	circular	2018-05-24	USA:Virginia		38.14	-78.45	Hospital waste water			IncFIB(K)_1, JN233704,	IncF RST(F-:A-:B-):FIA(-);FIB(-);FIC(-);FII(-);FIIK(-);FIIS(-);FIIY(-)	172839	52.5599	Klebsiella quasipneumoniae	Klebsiella quasipneumoniae (1463165)	Klebsiella (570)	Enterobacteriaceae (543)	Enterobacterales (91347)	Gammaproteobacteria (1236)	Proteobacteria (1224)	Bacteria (2)	5.86801	7.84901
NZ_CP020903.1	0.0877506	0	86	715	circular	2017-05-03	Norway	Norway	64.5732	11.528	urine	Homo sapiens		IncFII(K)_1, CP000648, |IncFIB(K)_1, JN233704,	IncF RST(K5:A-:B-):FIA(-);FIB(-);FIC(-);FII(-);FIIK(5);FIIS(-);FIIY(-)	200365	52.3924	Klebsiella pneumoniae	Klebsiella pneumoniae (573)	Klebsiella (570)	Enterobacteriaceae (543)	Enterobacterales (91347)	Gammaproteobacteria (1236)	Proteobacteria (1224)	Bacteria (2)	6.51635	7.67008
AP022521.1	0.0877506	0	86	716	circular	2020-10-09	Japan:Tokyo	Japan,Tokyo	34.6969	139.405				IncFII(pECLA)_1, CP001919, |IncFIB(pECLA)_1, CP001919,	IncF RST(F-:A-:B-):FIA(-);FIB(-);FIC(-);FII(-);FIIK(-);FIIS(-);FIIY(-)	159851	52.4201	Enterobacter cloacae	Enterobacter cloacae (550)	Enterobacter (547)	Enterobacteriaceae (543)	Enterobacterales (91347)	Gammaproteobacteria (1236)	Proteobacteria (1224)	Bacteria (2)	4.91519	7.13934
NZ_CP025516.1	0.0877506	0	86	717	circular	2019-04-03	Switzerland: Basel		47.5	7.6				IncFIB(K)_1, JN233704,	IncF RST(F-:A-:B-):FIA(-);FIB(-);FIC(-);FII(-);FIIK(-);FIIS(-);FIIY(-)	159714	52.5208	Klebsiella pneumoniae	Klebsiella pneumoniae (573)	Klebsiella (570)	Enterobacteriaceae (543)	Enterobacterales (91347)	Gammaproteobacteria (1236)	Proteobacteria (1224)	Bacteria (2)	5.86394	7.77986
NZ_CP024144.1	0.0877506	0	86	718	circular	2018-01-11	China	China	34.4118	86.0327	clinical patient		single cell	IncFIA(HI1)_1, AF250878, |IncFIB(K)_1, JN233704,	IncF RST(F-:A18:B-):FIA(18);FIB(-);FIC(-);FII(-);FIIK(-);FIIS(-);FIIY(-)	96973	51.4628	Escherichia coli	Escherichia coli (562)	Escherichia (561)	Enterobacteriaceae (543)	Enterobacterales (91347)	Gammaproteobacteria (1236)	Proteobacteria (1224)	Bacteria (2)	4.94672	5.09665
CP056795.1	0.0877506	0	86	719	circular	2020-07-28	United Kingdom	United Kingdom	54.7024	-3.27658	Freshwater sample from upstream of wastewater treatment plant		culture	IncFIB(pNDM-Mar)_1, JN420336, |IncHI1B(pNDM-MAR)_1, JN420336,	IncF RST(F-:A-:B-):FIA(-);FIB(-);FIC(-);FII(-);FIIK(-);FIIS(-);FIIY(-)|IncHI1 MLST(-):HCM1_043(-);HCM1_064(-);HCM1_099(-);HCM1_116(-);HCM1_178ac(-);HCM1_259(-);(-)	201308	44.5491	Escherichia coli	Escherichia coli (562)	Escherichia (561)	Enterobacteriaceae (543)	Enterobacterales (91347)	Gammaproteobacteria (1236)	Proteobacteria (1224)	Bacteria (2)	15.6597	-0.10673
NZ_KX023259.1	0.0877506	0	86	720	circular	2020-08-04								IncFIA(HI1)_1, AF250878, |IncFIB(K)_1, JN233704,	IncF RST(F-:A18:B-):FIA(18);FIB(-);FIC(-);FII(-);FIIK(-);FIIS(-);FIIY(-)	124259	51.5134	Escherichia coli	Escherichia coli (562)	Escherichia (561)	Enterobacteriaceae (543)	Enterobacterales (91347)	Gammaproteobacteria (1236)	Proteobacteria (1224)	Bacteria (2)	4.90396	5.08183
LR890226.1	0.0877506	0	86	721	circular	2020-10-30								repB_KLEB_VIR, AP006726, |IncHI1B(pNDM-MAR)_1, JN420336,	IncHI1 MLST(-):HCM1_043(-);HCM1_064(-);HCM1_099(-);HCM1_116(-);HCM1_178ac(-);HCM1_259(-);(-)	307989	49.7096	Klebsiella pneumoniae	Klebsiella pneumoniae (573)	Klebsiella (570)	Enterobacteriaceae (543)	Enterobacterales (91347)	Gammaproteobacteria (1236)	Proteobacteria (1224)	Bacteria (2)	4.91927	7.58163
CP052321.1	0.0877506	0	86	722	circular	2020-05-04	South Korea: Jeonnam		34.87	126.99	blood	Homo sapiens		IncFIB(K)_1, JN233704, |IncFIA(HI1)_1, AF250878, |IncFII(K)_1, CP000648,	IncF RST(K3:A-:B-):FIA(~21);FIB(-);FIC(-);FII(-);FIIK(3);FIIS(-);FIIY(-)	184184	50.2823	Klebsiella pneumoniae	Klebsiella pneumoniae (573)	Klebsiella (570)	Enterobacteriaceae (543)	Enterobacterales (91347)	Gammaproteobacteria (1236)	Proteobacteria (1224)	Bacteria (2)	5.68494	8.12947
NZ_CP024882.1	0.0877506	0	86	723	circular	2017-11-29	missing				missing	missing				115736	48.3964	Citrobacter freundii	Citrobacter freundii (546)	Citrobacter (544)	Enterobacteriaceae (543)	Enterobacterales (91347)	Gammaproteobacteria (1236)	Proteobacteria (1224)	Bacteria (2)	5.21432	7.36874
NZ_CP013323.1	0.0877506	0	86	724	circular	2016-01-27	USA:Virginia		38.14	-78.45	respiratory	Homo sapiens		IncFIB(K)_1, JN233704, |IncFII(K)_1, CP000648,	IncF RST(K15:A-:B-):FIA(-);FIB(-);FIC(-);FII(-);FIIK(15);FIIS(-);FIIY(-)	257944	52.7246	Klebsiella pneumoniae	Klebsiella pneumoniae (573)	Klebsiella (570)	Enterobacteriaceae (543)	Enterobacterales (91347)	Gammaproteobacteria (1236)	Proteobacteria (1224)	Bacteria (2)	5.68158	7.25518
NZ_CP034054.1	0.0882637	0	85	725	circular	2018-12-04					blood			IncHI1B(pNDM-MAR)_1, JN420336, |IncFIB(pNDM-Mar)_1, JN420336,	IncHI1 MLST(-):HCM1_043(-);HCM1_064(-);HCM1_099(-);HCM1_116(-);HCM1_178ac(-);HCM1_259(-);(-)|IncF RST(F-:A-:B-):FIA(-);FIB(-);FIC(-);FII(-);FIIK(-);FIIS(-);FIIY(-)	299188	47.3782	Klebsiella pneumoniae	Klebsiella pneumoniae (573)	Klebsiella (570)	Enterobacteriaceae (543)	Enterobacterales (91347)	Gammaproteobacteria (1236)	Proteobacteria (1224)	Bacteria (2)	15.6392	-0.0455937
NZ_CP031884.1	0.0882637	0	85	726	circular	2018-08-28	China: Sichuan		30.6416	104.061	sputum	Homo sapiens		IncX3_1, JN247852, |IncFII(K)_1, CP000648,	IncF RST(K1:A-:B-):FIA(-);FIB(-);FIC(-);FII(-);FIIK(1);FIIS(-);FIIY(-)	105259	51.0493	Klebsiella pneumoniae	Klebsiella pneumoniae (573)	Klebsiella (570)	Enterobacteriaceae (543)	Enterobacterales (91347)	Gammaproteobacteria (1236)	Proteobacteria (1224)	Bacteria (2)	-7.33465	5.88765
NZ_CP029430.1	0.0882637	0	85	727	circular	2018-05-24	USA:Virginia		38.14	-78.45	Hospital waste water			IncFIB(K)_1, JN233704,	IncF RST(F-:A-:B-):FIA(-);FIB(-);FIC(-);FII(-);FIIK(-);FIIS(-);FIIY(-)	177029	51.635	Klebsiella quasipneumoniae	Klebsiella quasipneumoniae (1463165)	Klebsiella (570)	Enterobacteriaceae (543)	Enterobacterales (91347)	Gammaproteobacteria (1236)	Proteobacteria (1224)	Bacteria (2)	5.82736	7.7987
NZ_MN891675.1	0.0882637	0	85	728	circular	2020-08-04								IncFII(K)_1, CP000648, |IncFIB(K)_1, JN233704,	IncF RST(K7:A-:B-):FIA(-);FIB(-);FIC(-);FII(-);FIIK(7);FIIS(-);FIIY(-)	201841	51.9037	Klebsiella pneumoniae	Klebsiella pneumoniae (573)	Klebsiella (570)	Enterobacteriaceae (543)	Enterobacterales (91347)	Gammaproteobacteria (1236)	Proteobacteria (1224)	Bacteria (2)	5.82619	8.43348
CP052491.1	0.0882637	0	85	729	circular	2020-05-04	South Korea: Gyeonggi		37.66	126.77	blood	Homo sapiens		IncFIB(K)_1, JN233704, |IncFII(pKP91)_1, CP000966,	IncF RST(K9:A-:B-):FIA(-);FIB(-);FIC(-);FII(-);FIIK(9);FIIS(-);FIIY(-)	247408	51.6325	Klebsiella pneumoniae	Klebsiella pneumoniae (573)	Klebsiella (570)	Enterobacteriaceae (543)	Enterobacterales (91347)	Gammaproteobacteria (1236)	Proteobacteria (1224)	Bacteria (2)	5.72079	8.42559
NZ_CP036337.1	0.0882637	0	85	730	circular	2019-03-02	India		12.9165	79.1325	blood	Homo sapiens		IncFII(pKP91)_1, CP000966, |IncFIB(K)_1, JN233704,	IncF RST(F-:A-:B-):FIA(-);FIB(-);FIC(-);FII(-);FIIK(~25);FIIS(-);FIIY(-)	225575	52.3963	Klebsiella pneumoniae	Klebsiella pneumoniae (573)	Klebsiella (570)	Enterobacteriaceae (543)	Enterobacterales (91347)	Gammaproteobacteria (1236)	Proteobacteria (1224)	Bacteria (2)	6.56586	7.66963
NZ_CP036336.1	0.0882637	0	85	731	circular	2019-03-02	India		12.9165	79.1325	blood	Homo sapiens		IncHI1B(pNDM-MAR)_1, JN420336,	IncHI1 MLST(-):HCM1_043(-);HCM1_064(-);HCM1_099(-);HCM1_116(-);HCM1_178ac(-);HCM1_259(-);(-)	242563	45.4282	Klebsiella pneumoniae	Klebsiella pneumoniae (573)	Klebsiella (570)	Enterobacteriaceae (543)	Enterobacterales (91347)	Gammaproteobacteria (1236)	Proteobacteria (1224)	Bacteria (2)	15.659	-0.0759831
NZ_CP055884.1	0.0882637	0	85	732	circular	2020-07-30	United Kingdom	United Kingdom	54.7024	-3.27658	Wastewater influent sample		culture	IncFII(pECLA)_1, CP001919, |IncFIA(HI1)_1, AF250878,	IncF RST(F-:A-:B-):FIA(-);FIB(-);FIC(-);FII(-);FIIK(-);FIIS(-);FIIY(-)	137954	52.387	Enterobacter sp. RHBSTW-00975	Enterobacter sp. RHBSTW-00975 (2742673)	Enterobacter (547)	Enterobacteriaceae (543)	Enterobacterales (91347)	Gammaproteobacteria (1236)	Proteobacteria (1224)	Bacteria (2)	4.98361	7.15728
NZ_CP020506.1	0.0882637	0	85	733	circular	2019-08-25	USA:Boston	USA,Boston	42.3603	-71.0583	sputum	Homo sapiens		IncFIB(pB171)_1, AB024946, |IncR_1, DQ449578, |IncFII(K)_1, CP000648,	IncF RST(K5:A-:B70):FIA(-);FIB(70);FIC(-);FII(-);FIIK(5);FIIS(-);FIIY(-)	219979	51.5754	Serratia marcescens	Serratia marcescens (615)	Serratia (613)	Yersiniaceae (1903411)	Enterobacterales (91347)	Gammaproteobacteria (1236)	Proteobacteria (1224)	Bacteria (2)	5.74572	7.40069
NZ_MK036889.1	0.0887833	0	84	734	circular	2020-06-03								IncFIB(K)_1, JN233704, |IncFII(K)_1, CP000648,	IncF RST(K2:A-:B-):FIA(-);FIB(-);FIC(-);FII(-);FIIK(2);FIIS(-);FIIY(-)	242356	52.1819	Klebsiella pneumoniae	Klebsiella pneumoniae (573)	Klebsiella (570)	Enterobacteriaceae (543)	Enterobacterales (91347)	Gammaproteobacteria (1236)	Proteobacteria (1224)	Bacteria (2)	5.64281	8.58317
NZ_CP036188.1	0.0887833	0	84	735	circular	2019-02-27	India		12.9246	79.1348	blood	Homo sapiens		IncFIB(K)_1, JN233704, |IncFII(pKP91)_1, CP000966,	IncF RST(F-:A-:B-):FIA(-);FIB(-);FIC(-);FII(-);FIIK(~25);FIIS(-);FIIY(-)	251327	52.2674	Klebsiella pneumoniae	Klebsiella pneumoniae (573)	Klebsiella (570)	Enterobacteriaceae (543)	Enterobacterales (91347)	Gammaproteobacteria (1236)	Proteobacteria (1224)	Bacteria (2)	6.56505	7.65618
NZ_CP024543.1	0.0887833	0	84	736	circular	2017-11-08								FIA(pBK30683)_1, KF954760, |IncFII(pKP91)_1, CP000966,	IncF RST(K4:A-:B-):FIA(~21);FIB(-);FIC(-);FII(-);FIIK(4);FIIS(-);FIIY(-)	110374	52.2306	Klebsiella pneumoniae	Klebsiella pneumoniae (573)	Klebsiella (570)	Enterobacteriaceae (543)	Enterobacterales (91347)	Gammaproteobacteria (1236)	Proteobacteria (1224)	Bacteria (2)	5.9049	7.12677
CP044377.1	0.0887833	0	84	737	circular	2019-12-11	Taiwan	Taiwan	23.5983	120.835	missing	Homo sapiens		IncFIB(pNDM-Mar)_1, JN420336, |IncN_1, AY046276, |IncHI1B(pNDM-MAR)_1, JN420336,	IncF RST(F-:A-:B-):FIA(-);FIB(-);FIC(-);FII(-);FIIK(-);FIIS(-);FIIY(-)|IncN MLST(-):repN(1);traJ(-);korA(-)|IncHI1 MLST(-):HCM1_043(-);HCM1_064(-);HCM1_099(-);HCM1_116(-);HCM1_178ac(-);HCM1_259(-);(-)	310104	46.8391	Klebsiella pneumoniae	Klebsiella pneumoniae (573)	Klebsiella (570)	Enterobacteriaceae (543)	Enterobacterales (91347)	Gammaproteobacteria (1236)	Proteobacteria (1224)	Bacteria (2)	15.647	-0.0771407
NZ_CP012567.1	0.0887833	0	84	738	circular	2016-11-27	USA: California		34.0561	-118.43	abdominal drainage	Homo sapiens		IncFIB(K)_1, JN233704, |IncFII(K)_1, CP000648,	IncF RST(K5:A-:B-):FIA(-);FIB(-);FIC(-);FII(-);FIIK(5);FIIS(-);FIIY(-)	196706	52.4148	Klebsiella pneumoniae	Klebsiella pneumoniae (573)	Klebsiella (570)	Enterobacteriaceae (543)	Enterobacterales (91347)	Gammaproteobacteria (1236)	Proteobacteria (1224)	Bacteria (2)	6.52559	7.68274
CP056540.1	0.0887833	0	84	739	circular	2020-07-27	United Kingdom	United Kingdom	54.7024	-3.27658	Freshwater sample from downstream of wastewater treatment plant		culture	IncFIB(K)_1, JN233704, |Col440I_1, CP023920, |IncFII(pKP91)_1, CP000966,	IncF RST(K28:A-:B-):FIA(-);FIB(-);FIC(-);FII(-);FIIK(28);FIIS(-);FIIY(10?)	235311	52.7855	Klebsiella oxytoca	Klebsiella oxytoca (571)	Klebsiella (570)	Enterobacteriaceae (543)	Enterobacterales (91347)	Gammaproteobacteria (1236)	Proteobacteria (1224)	Bacteria (2)	5.56599	7.52721
LR890628.1	0.0887833	0	84	740	circular	2020-10-30	Australia: Melbourne		-37.8457	144.982	rectal swab	Homo sapiens		repB_KLEB_VIR, AP006726, |IncHI1B(pNDM-MAR)_1, JN420336,	IncHI1 MLST(-):HCM1_043(-);HCM1_064(-);HCM1_099(-);HCM1_116(-);HCM1_178ac(-);HCM1_259(-);(-)	231763	49.9329	Klebsiella pneumoniae	Klebsiella pneumoniae (573)	Klebsiella (570)	Enterobacteriaceae (543)	Enterobacterales (91347)	Gammaproteobacteria (1236)	Proteobacteria (1224)	Bacteria (2)	4.87914	7.54364
LR890599.1	0.0887833	0	84	741	circular	2020-10-30								IncFIB(K)(pCAV1099-114)_1, CP011596, |IncFII(pKP91)_1, CP000966,	IncF RST(K12:A-:B-):FIA(-);FIB(-);FIC(-);FII(-);FIIK(12);FIIS(-);FIIY(-)	128438	50.5956	Klebsiella pneumoniae	Klebsiella pneumoniae (573)	Klebsiella (570)	Enterobacteriaceae (543)	Enterobacterales (91347)	Gammaproteobacteria (1236)	Proteobacteria (1224)	Bacteria (2)	5.99663	7.73841
NZ_CP023978.1	0.0893096	0	83	742	circular	2018-09-02	China:Beijing		39.56	116.2	sputum	Homo sapiens		IncR_1, DQ449578, |IncFIB(K)(pCAV1099-114)_1, CP011596,	IncF RST(F-:A-:B-):FIA(-);FIB(-);FIC(-);FII(-);FIIK(-);FIIS(-);FIIY(-)	213341	51.0272	Klebsiella variicola	Klebsiella variicola (244366)	Klebsiella (570)	Enterobacteriaceae (543)	Enterobacterales (91347)	Gammaproteobacteria (1236)	Proteobacteria (1224)	Bacteria (2)	5.14837	7.99975
NZ_CP056665.1	0.0893096	0	83	743	circular	2020-08-03	United Kingdom	United Kingdom	54.7024	-3.27658	Wastewater influent sample		culture	IncFII(pECLA)_1, CP001919, |IncFIB(pECLA)_1, CP001919,	IncF RST(F-:A-:B-):FIA(-);FIB(-);FIC(-);FII(-);FIIK(-);FIIS(-);FIIY(-)	83283	52.2195	Enterobacter hormaechei	Enterobacter hormaechei (158836)	Enterobacter (547)	Enterobacteriaceae (543)	Enterobacterales (91347)	Gammaproteobacteria (1236)	Proteobacteria (1224)	Bacteria (2)	5.00103	7.19402
CP056497.1	0.0893096	0	83	744	circular	2020-07-27	United Kingdom	United Kingdom	54.7024	-3.27658	Wastewater influent sample		culture	IncFIB(K)_1, JN233704, |IncFII(p14)_1, JQ418538,	IncF RST(F-:A-:B-):FIA(-);FIB(-);FIC(-);FII(-);FIIK(12?);FIIS(-);FIIY(-)	164815	51.9783	Klebsiella oxytoca	Klebsiella oxytoca (571)	Klebsiella (570)	Enterobacteriaceae (543)	Enterobacterales (91347)	Gammaproteobacteria (1236)	Proteobacteria (1224)	Bacteria (2)	5.52028	7.48077
CP052327.1	0.0893096	0	83	745	circular	2020-05-04	South Korea: Jeonnam		34.87	126.99	blood	Homo sapiens		IncFIB(pNDM-Mar)_1, JN420336, |IncHI1B(pNDM-MAR)_1, JN420336,	IncF RST(F-:A-:B-):FIA(-);FIB(-);FIC(-);FII(-);FIIK(-);FIIS(-);FIIY(-)|IncHI1 MLST(-):HCM1_043(-);HCM1_064(-);HCM1_099(-);HCM1_116(-);HCM1_178ac(-);HCM1_259(-);(-)	273060	46.7161	Klebsiella pneumoniae	Klebsiella pneumoniae (573)	Klebsiella (570)	Enterobacteriaceae (543)	Enterobacterales (91347)	Gammaproteobacteria (1236)	Proteobacteria (1224)	Bacteria (2)	15.6438	-0.0808066
NZ_CP034679.1	0.0893096	0	83	746	circular	2019-01-06	China: Sichuan	China,Sichuan	30.5	102.5	feces	swine	single cell	IncFIB(K)_1, JN233704, |IncFII(K)_1, CP000648,	IncF RST(K20:A-:B-):FIA(-);FIB(-);FIC(-);FII(-);FIIK(20);FIIS(-);FIIY(-)	83909	49.9291	Klebsiella quasipneumoniae	Klebsiella quasipneumoniae (1463165)	Klebsiella (570)	Enterobacteriaceae (543)	Enterobacterales (91347)	Gammaproteobacteria (1236)	Proteobacteria (1224)	Bacteria (2)	5.77638	7.64687
LR890179.1	0.0893096	0	83	747	circular	2020-10-30								repB_KLEB_VIR, AP006726, |IncHI1B(pNDM-MAR)_1, JN420336,	IncHI1 MLST(-):HCM1_043(-);HCM1_064(-);HCM1_099(-);HCM1_116(-);HCM1_178ac(-);HCM1_259(-);(-)	303850	49.6686	Klebsiella pneumoniae	Klebsiella pneumoniae (573)	Klebsiella (570)	Enterobacteriaceae (543)	Enterobacterales (91347)	Gammaproteobacteria (1236)	Proteobacteria (1224)	Bacteria (2)	4.92778	7.56653
NZ_CP052873.1	0.0893096	0	83	748	circular	2020-05-06	Italy: Milan		45.46	9.19	blood	Homo sapiens				190697	52.1487	Enterobacter cloacae	Enterobacter cloacae (550)	Enterobacter (547)	Enterobacteriaceae (543)	Enterobacterales (91347)	Gammaproteobacteria (1236)	Proteobacteria (1224)	Bacteria (2)	5.07275	7.21871
NZ_CP058129.1	0.0893096	0	83	749	circular	2020-07-30	United Kingdom	United Kingdom	54.7024	-3.27658	Wastewater influent sample		culture	IncFII(pECLA)_1, CP001919, |IncFIB(pECLA)_1, CP001919,	IncF RST(F-:A-:B-):FIA(-);FIB(-);FIC(-);FII(-);FIIK(-);FIIS(-);FIIY(-)	87112	52.1226	Enterobacter hormaechei	Enterobacter hormaechei (158836)	Enterobacter (547)	Enterobacteriaceae (543)	Enterobacterales (91347)	Gammaproteobacteria (1236)	Proteobacteria (1224)	Bacteria (2)	5.03265	7.21109
NZ_CP042507.1	0.0893096	0	83	750	circular	2020-06-04	Australia: Sydney	Australia,Sydney	-33.8548	151.216	Shower 3		Whole organism			200529	52.5236	Leclercia adecarboxylata	Leclercia adecarboxylata (83655)	Leclercia (83654)	Enterobacteriaceae (543)	Enterobacterales (91347)	Gammaproteobacteria (1236)	Proteobacteria (1224)	Bacteria (2)	5.10889	7.23774
MN543575.1	0.0893096	0	83	751	circular	2020-06-12								IncR_1, DQ449578, |IncFIB(pNDM-Mar)_1, JN420336,	IncF RST(F-:A-:B-):FIA(-);FIB(-);FIC(-);FII(-);FIIK(-);FIIS(-);FIIY(-)	327581	46.9142	Klebsiella pneumoniae	Klebsiella pneumoniae (573)	Klebsiella (570)	Enterobacteriaceae (543)	Enterobacterales (91347)	Gammaproteobacteria (1236)	Proteobacteria (1224)	Bacteria (2)	15.4787	0.420966
NZ_CP059891.1	0.0898429	0	82	752	circular	2020-08-12								IncFIB(K)_1, JN233704, |FII(pBK30683)_1, KF954760,	IncF RST(F-:A-:B-):FIA(-);FIB(-);FIC(-);FII(-);FIIK(21?);FIIS(-);FIIY(-)	189307	52.9251	Klebsiella pneumoniae subsp. pneumoniae	Klebsiella pneumoniae (573)	Klebsiella (570)	Enterobacteriaceae (543)	Enterobacterales (91347)	Gammaproteobacteria (1236)	Proteobacteria (1224)	Bacteria (2)	6.54045	7.65088
NZ_CP056712.1	0.0898429	0	82	753	circular	2020-08-03	United Kingdom	United Kingdom	54.7024	-3.27658	Freshwater sample from upstream of wastewater treatment plant		culture	IncFII(pECLA)_1, CP001919, |IncFIB(K)_1, JN233704, |IncR_1, DQ449578,	IncF RST(F-:A-:B-):FIA(-);FIB(-);FIC(-);FII(-);FIIK(-);FIIS(-);FIIY(-)	240613	52.7611	Enterobacter asburiae	Enterobacter asburiae (61645)	Enterobacter (547)	Enterobacteriaceae (543)	Enterobacterales (91347)	Gammaproteobacteria (1236)	Proteobacteria (1224)	Bacteria (2)	5.07206	7.27668
NZ_CP008907.1	0.0898429	0	82	754	circular	2015-01-21	USA	USA	39.7837	-100.446	urine		missing	IncFII(pECLA)_1, CP001919, |IncFIB(pECLA)_1, CP001919,	IncF RST(F-:A-:B-):FIA(-);FIB(-);FIC(-);FII(-);FIIK(-);FIIS(-);FIIY(-)	111227	53.0168	Enterobacter hormaechei subsp. hoffmannii ECR091	Enterobacter hormaechei (158836)	Enterobacter (547)	Enterobacteriaceae (543)	Enterobacterales (91347)	Gammaproteobacteria (1236)	Proteobacteria (1224)	Bacteria (2)	4.96847	7.17788
NZ_CP041514.1	0.0898429	0	82	755	circular	2019-07-30	South Korea	South Korea	36.5582	127.941	soil		cell culture	IncFII(pKP91)_1, CP000966, |IncFIB(K)_1, JN233704,	IncF RST(F-:A-:B-):FIA(-);FIB(-);FIC(-);FII(-);FIIK(17?);FIIS(-);FIIY(10?)	203764	52.0637	Klebsiella michiganensis	Klebsiella michiganensis (1134687)	Klebsiella (570)	Enterobacteriaceae (543)	Enterobacterales (91347)	Gammaproteobacteria (1236)	Proteobacteria (1224)	Bacteria (2)	5.675	7.27512
CP009855.1	0.0898429	0	82	756	circular	2014-11-17	USA	USA	39.7837	-100.446	sink drain		missing	IncFIB(pECLA)_1, CP001919, |IncFII(pECLA)_1, CP001919,	IncF RST(F-:A-:B-):FIA(-);FIB(-);FIC(-);FII(-);FIIK(-);FIIS(-);FIIY(-)	111232	53.0189	Enterobacter cloacae	Enterobacter cloacae (550)	Enterobacter (547)	Enterobacteriaceae (543)	Enterobacterales (91347)	Gammaproteobacteria (1236)	Proteobacteria (1224)	Bacteria (2)	4.98795	7.19064
CP052218.1	0.0898429	0	82	757	circular	2020-05-04	South Korea: Jeonnam		34.87	126.99	blood	Homo sapiens		IncFIB(K)_1, JN233704, |IncFII(K)_1, CP000648,	IncF RST(K5:A-:B-):FIA(-);FIB(-);FIC(-);FII(-);FIIK(5);FIIS(-);FIIY(-)	203220	52.3261	Klebsiella pneumoniae	Klebsiella pneumoniae (573)	Klebsiella (570)	Enterobacteriaceae (543)	Enterobacterales (91347)	Gammaproteobacteria (1236)	Proteobacteria (1224)	Bacteria (2)	6.51691	7.67525
NZ_CP029448.1	0.0898429	0	82	758	circular	2019-11-27	USA:Virginia		38.14	-78.45	Peri-rectal	Homo sapiens		IncFII(pCRY)_1, NC_005814, |IncFII(K)_1, CP000648, |IncFIB(K)_1, JN233704,	IncF RST(K5:A-:B-):FIA(-);FIB(-);FIC(-);FII(-);FIIK(5);FIIS(-);FIIY(-)	204825	51.4981	Serratia marcescens	Serratia marcescens (615)	Serratia (613)	Yersiniaceae (1903411)	Enterobacterales (91347)	Gammaproteobacteria (1236)	Proteobacteria (1224)	Bacteria (2)	5.55553	7.32665
NZ_CP032223.1	0.0903831	0	81	759	circular	2018-09-19	missing				missing	missing		IncFIB(pNDM-Mar)_1, JN420336, |IncHI1B(pNDM-MAR)_1, JN420336,	IncF RST(F-:A-:B-):FIA(-);FIB(-);FIC(-);FII(-);FIIK(-);FIIS(-);FIIY(-)|IncHI1 MLST(-):HCM1_043(-);HCM1_064(-);HCM1_099(-);HCM1_116(-);HCM1_178ac(-);HCM1_259(-);(-)	201149	44.829	Klebsiella pneumoniae	Klebsiella pneumoniae (573)	Klebsiella (570)	Enterobacteriaceae (543)	Enterobacterales (91347)	Gammaproteobacteria (1236)	Proteobacteria (1224)	Bacteria (2)	15.6482	-0.0799067
CP056561.1	0.0903831	0	81	760	circular	2020-07-27	United Kingdom	United Kingdom	54.7024	-3.27658	Wastewater effluent sample		culture	IncFII(pECLA)_1, CP001919, |IncFIA(HI1)_1, AF250878,	IncF RST(F-:A-:B-):FIA(-);FIB(-);FIC(-);FII(-);FIIK(-);FIIS(-);FIIY(-)	137623	53.4809	Enterobacter cloacae	Enterobacter cloacae (550)	Enterobacter (547)	Enterobacteriaceae (543)	Enterobacterales (91347)	Gammaproteobacteria (1236)	Proteobacteria (1224)	Bacteria (2)	4.92489	7.16558
NZ_MK036891.1	0.0903831	0	81	761	circular	2020-06-03										138399	52.5098	Leclercia adecarboxylata	Leclercia adecarboxylata (83655)	Leclercia (83654)	Enterobacteriaceae (543)	Enterobacterales (91347)	Gammaproteobacteria (1236)	Proteobacteria (1224)	Bacteria (2)	5.22615	7.28492
CP052435.1	0.0903831	0	81	762	circular	2020-05-04	South Korea: Gangwon		37.82	128.16	blood	Homo sapiens		IncFIB(K)_1, JN233704,	IncF RST(F-:A-:B-):FIA(-);FIB(-);FIC(-);FII(-);FIIK(-);FIIS(-);FIIY(-)	150477	52.1894	Klebsiella pneumoniae	Klebsiella pneumoniae (573)	Klebsiella (570)	Enterobacteriaceae (543)	Enterobacterales (91347)	Gammaproteobacteria (1236)	Proteobacteria (1224)	Bacteria (2)	6.54943	7.69523
CP056462.1	0.0903831	0	81	763	circular	2020-07-27	United Kingdom	United Kingdom	54.7024	-3.27658	Freshwater sample from downstream of wastewater treatment plant		culture	IncFII(pECLA)_1, CP001919, |IncFIB(pECLA)_1, CP001919,	IncF RST(F-:A-:B-):FIA(-);FIB(-);FIC(-);FII(-);FIIK(-);FIIS(-);FIIY(-)	80796	52.0756	Enterobacter cloacae	Enterobacter cloacae (550)	Enterobacter (547)	Enterobacteriaceae (543)	Enterobacterales (91347)	Gammaproteobacteria (1236)	Proteobacteria (1224)	Bacteria (2)	4.95112	7.13534
NZ_CP057067.1	0.0903831	0	81	764	circular	2020-08-03	United Kingdom	United Kingdom	54.7024	-3.27658	Pooled cattle faecal samples collected from floor of farm		culture	IncFIB(pNDM-Mar)_1, JN420336, |IncHI1B(pNDM-MAR)_1, JN420336,	IncF RST(F-:A-:B-):FIA(-);FIB(-);FIC(-);FII(-);FIIK(-);FIIS(-);FIIY(-)|IncHI1 MLST(-):HCM1_043(-);HCM1_064(-);HCM1_099(-);HCM1_116(-);HCM1_178ac(-);HCM1_259(-);(-)	242087	45.5398	Klebsiella pneumoniae	Klebsiella pneumoniae (573)	Klebsiella (570)	Enterobacteriaceae (543)	Enterobacterales (91347)	Gammaproteobacteria (1236)	Proteobacteria (1224)	Bacteria (2)	15.6544	-0.0774725
NZ_CP056728.1	0.0903831	0	81	765	circular	2020-08-03	United Kingdom	United Kingdom	54.7024	-3.27658	Wastewater influent sample		culture	IncFII(pECLA)_1, CP001919, |IncFIB(pECLA)_1, CP001919,	IncF RST(F-:A-:B-):FIA(-);FIB(-);FIC(-);FII(-);FIIK(-);FIIS(-);FIIY(-)	96235	51.766	Enterobacter hormaechei	Enterobacter hormaechei (158836)	Enterobacter (547)	Enterobacteriaceae (543)	Enterobacterales (91347)	Gammaproteobacteria (1236)	Proteobacteria (1224)	Bacteria (2)	4.98266	7.20741
NZ_CP056677.1	0.0903831	0	81	766	circular	2020-08-03	United Kingdom	United Kingdom	54.7024	-3.27658	Wastewater effluent sample		culture	IncFII(pECLA)_1, CP001919, |IncFIB(pECLA)_1, CP001919,	IncF RST(F-:A-:B-):FIA(-);FIB(-);FIC(-);FII(-);FIIK(-);FIIS(-);FIIY(-)	93159	52.6025	Enterobacter hormaechei	Enterobacter hormaechei (158836)	Enterobacter (547)	Enterobacteriaceae (543)	Enterobacterales (91347)	Gammaproteobacteria (1236)	Proteobacteria (1224)	Bacteria (2)	4.97218	7.20288
NZ_LT991959.1	0.0903831	0	81	767	linear	2018-03-22					hospital			IncFIB(pB171)_1, AB024946,	IncF RST(F-:A-:B-):FIA(-);FIB(-);FIC(-);FII(-);FIIK(-);FIIS(-);FIIY(-)	142732	53.7574	Enterobacter cloacae complex sp.	Enterobacter cloacae complex sp. (2027919)	Enterobacter (547)	Enterobacteriaceae (543)	Enterobacterales (91347)	Gammaproteobacteria (1236)	Proteobacteria (1224)	Bacteria (2)	5.37135	7.38088
CP056176.1	0.0903831	0	81	768	circular	2020-07-27	United Kingdom	United Kingdom	54.7024	-3.27658	Wastewater effluent sample		culture	IncFII(pECLA)_1, CP001919, |IncFIB(pECLA)_1, CP001919,	IncF RST(F-:A-:B-):FIA(-);FIB(-);FIC(-);FII(-);FIIK(-);FIIS(-);FIIY(-)	80781	52.0704	Enterobacter roggenkampii	Enterobacter roggenkampii (1812935)	Enterobacter (547)	Enterobacteriaceae (543)	Enterobacterales (91347)	Gammaproteobacteria (1236)	Proteobacteria (1224)	Bacteria (2)	4.98101	7.18449
NZ_CP020508.1	0.0903831	0	81	769	circular	2019-08-25	USA:Boston	USA,Boston	42.3603	-71.0583	sputum	Homo sapiens		IncFII(K)_1, CP000648, |IncR_1, DQ449578, |IncFIB(pB171)_1, AB024946,	IncF RST(K5:A-:B70):FIA(-);FIB(70);FIC(-);FII(-);FIIK(5);FIIS(-);FIIY(-)	224208	51.4611	Serratia marcescens	Serratia marcescens (615)	Serratia (613)	Yersiniaceae (1903411)	Enterobacterales (91347)	Gammaproteobacteria (1236)	Proteobacteria (1224)	Bacteria (2)	5.71743	7.33313
NZ_CP018696.1	0.0909306	0	80	770	circular	2016-12-20	Germany: Goettingen		51.5392	9.91156	abdominal drain fluid	Homo sapiens		IncFIB(pNDM-Mar)_1, JN420336, |IncHI1B(pNDM-MAR)_1, JN420336,	IncF RST(F-:A-:B-):FIA(-);FIB(-);FIC(-);FII(-);FIIK(-);FIIS(-);FIIY(-)|IncHI1 MLST(-):HCM1_043(-);HCM1_064(-);HCM1_099(-);HCM1_116(-);HCM1_178ac(-);HCM1_259(-);(-)	246755	45.1176	Klebsiella pneumoniae	Klebsiella pneumoniae (573)	Klebsiella (570)	Enterobacteriaceae (543)	Enterobacterales (91347)	Gammaproteobacteria (1236)	Proteobacteria (1224)	Bacteria (2)	15.6288	-0.103927
NZ_CP018708.1	0.0909306	0	80	771	circular	2016-12-20	Germany: Goettingen		51.5392	9.91156	nasal swab	Homo sapiens		IncFIB(pNDM-Mar)_1, JN420336, |IncHI1B(pNDM-MAR)_1, JN420336,	IncF RST(F-:A-:B-):FIA(-);FIB(-);FIC(-);FII(-);FIIK(-);FIIS(-);FIIY(-)|IncHI1 MLST(-):HCM1_043(-);HCM1_064(-);HCM1_099(-);HCM1_116(-);HCM1_178ac(-);HCM1_259(-);(-)	246756	45.1174	Klebsiella pneumoniae	Klebsiella pneumoniae (573)	Klebsiella (570)	Enterobacteriaceae (543)	Enterobacterales (91347)	Gammaproteobacteria (1236)	Proteobacteria (1224)	Bacteria (2)	15.6303	-0.106046
NZ_CP035211.1	0.0909306	0	80	772	circular	2019-10-31	Thailand		13.7367	100.523	stool	Homo sapiens		IncFIB(K)_1, JN233704, |IncFII(K)_1, CP000648,	IncF RST(K1:A-:B-):FIA(-);FIB(-);FIC(-);FII(-);FIIK(1);FIIS(-);FIIY(-)	132160	50.7173	Klebsiella pneumoniae	Klebsiella pneumoniae (573)	Klebsiella (570)	Enterobacteriaceae (543)	Enterobacterales (91347)	Gammaproteobacteria (1236)	Proteobacteria (1224)	Bacteria (2)	6.04782	7.85318
NZ_CP018687.1	0.0909306	0	80	773	circular	2016-12-20	Germany: Goettingen		51.5392	9.91156	tracheal secretion	Homo sapiens		IncHI1B(pNDM-MAR)_1, JN420336, |IncFIB(pNDM-Mar)_1, JN420336,	IncHI1 MLST(-):HCM1_043(-);HCM1_064(-);HCM1_099(-);HCM1_116(-);HCM1_178ac(-);HCM1_259(-);(-)|IncF RST(F-:A-:B-):FIA(-);FIB(-);FIC(-);FII(-);FIIK(-);FIIS(-);FIIY(-)	246757	45.1185	Klebsiella pneumoniae	Klebsiella pneumoniae (573)	Klebsiella (570)	Enterobacteriaceae (543)	Enterobacterales (91347)	Gammaproteobacteria (1236)	Proteobacteria (1224)	Bacteria (2)	15.6301	-0.106011
NC_023025.1	0.0909306	0	80	774	circular	2013-12-12								IncFIB(pCTU3)_1, FN543096,	IncF RST(F-:A-:B-):FIA(-);FIB(-);FIC(-);FII(-);FIIK(-);FIIS(-);FIIY(-)	55913	50.3801	Cronobacter malonaticus	Cronobacter malonaticus (413503)	Cronobacter (413496)	Enterobacteriaceae (543)	Enterobacterales (91347)	Gammaproteobacteria (1236)	Proteobacteria (1224)	Bacteria (2)	5.22306	7.41779
NZ_CP029435.1	0.0909306	0	80	775	circular	2018-05-24	USA:Virginia		38.14	-78.45	Peri-rectal	Homo sapiens		IncFIB(K)_1, JN233704,	IncF RST(F-:A-:B-):FIA(-);FIB(-);FIC(-);FII(-);FIIK(-);FIIS(-);FIIY(-)	155523	52.3832	Klebsiella quasipneumoniae	Klebsiella quasipneumoniae (1463165)	Klebsiella (570)	Enterobacteriaceae (543)	Enterobacterales (91347)	Gammaproteobacteria (1236)	Proteobacteria (1224)	Bacteria (2)	5.86797	7.81823
NZ_CP026390.1	0.0909306	0	80	776	circular	2018-02-24	USA		38.9847	-77.0947						195394	52.7775	Leclercia sp. LSNIH3	Leclercia sp. LSNIH3 (1920116)	Leclercia (83654)	Enterobacteriaceae (543)	Enterobacterales (91347)	Gammaproteobacteria (1236)	Proteobacteria (1224)	Bacteria (2)	5.0728	7.20951
NZ_CP036447.1	0.0909306	0	80	777	circular	2019-02-26	USA		38.9847	-77.0947	missing	missing		IncR_1, DQ449578,		87465	53.8295	Klebsiella pneumoniae	Klebsiella pneumoniae (573)	Klebsiella (570)	Enterobacteriaceae (543)	Enterobacterales (91347)	Gammaproteobacteria (1236)	Proteobacteria (1224)	Bacteria (2)	4.44615	4.98066
NZ_MT074086.1	0.0909306	0	80	778	circular	2020-11-17								IncFII(p14)_1, JQ418538, |IncFIB(K)_1, JN233704,	IncF RST(F-:A-:B-):FIA(-);FIB(-);FIC(-);FII(-);FIIK(12?);FIIS(-);FIIY(-)	184801	51.497	Raoultella ornithinolytica	Raoultella ornithinolytica (54291)	Raoultella (160674)	Enterobacteriaceae (543)	Enterobacterales (91347)	Gammaproteobacteria (1236)	Proteobacteria (1224)	Bacteria (2)	5.38528	7.12208
NZ_CP031796.1	0.0909306	0	80	779	circular	2018-09-02								IncFIB(K)(pCAV1099-114)_1, CP011596,	IncF RST(F-:A-:B-):FIA(-);FIB(-);FIC(-);FII(-);FIIK(-);FIIS(-);FIIY(-)	169772	49.0417	Klebsiella pneumoniae	Klebsiella pneumoniae (573)	Klebsiella (570)	Enterobacteriaceae (543)	Enterobacterales (91347)	Gammaproteobacteria (1236)	Proteobacteria (1224)	Bacteria (2)	5.06079	7.96575
LR890477.1	0.0909306	0	80	780	circular	2020-10-30								IncFIB(K)_1, JN233704, |IncFII(K)_1, CP000648,	IncF RST(K15:A-:B-):FIA(-);FIB(-);FIC(-);FII(-);FIIK(15);FIIS(-);FIIY(-)	307129	51.6379	Klebsiella pneumoniae	Klebsiella pneumoniae (573)	Klebsiella (570)	Enterobacteriaceae (543)	Enterobacterales (91347)	Gammaproteobacteria (1236)	Proteobacteria (1224)	Bacteria (2)	5.6423	7.26792
NZ_CP012572.1	0.0909306	0	80	781	circular	2016-11-27	USA: California		34.0561	-118.43	Rectal	Homo sapiens		IncFIB(K)_1, JN233704, |IncFII(K)_1, CP000648,	IncF RST(K5:A-:B-):FIA(-);FIB(-);FIC(-);FII(-);FIIK(5);FIIS(-);FIIY(-)	163420	51.7483	Klebsiella pneumoniae	Klebsiella pneumoniae (573)	Klebsiella (570)	Enterobacteriaceae (543)	Enterobacterales (91347)	Gammaproteobacteria (1236)	Proteobacteria (1224)	Bacteria (2)	6.50135	7.65127
LR890687.1	0.0909306	0	80	782	circular	2020-10-30								IncFIB(K)(pCAV1099-114)_1, CP011596,	IncF RST(F-:A-:B-):FIA(-);FIB(-);FIC(-);FII(-);FIIK(-);FIIS(-);FIIY(-)	169772	49.0428	Klebsiella pneumoniae	Klebsiella pneumoniae (573)	Klebsiella (570)	Enterobacteriaceae (543)	Enterobacterales (91347)	Gammaproteobacteria (1236)	Proteobacteria (1224)	Bacteria (2)	5.01326	8.0096
NC_023332.1	0.0909306	0	80	783	circular	2014-01-24								IncFIB(K)_1, JN233704, |IncFII(K)_1, CP000648,	IncF RST(K5:A-:B-):FIA(-);FIB(-);FIC(-);FII(-);FIIK(5);FIIS(-);FIIY(-)	213019	52.5117	Klebsiella pneumoniae	Klebsiella pneumoniae (573)	Klebsiella (570)	Enterobacteriaceae (543)	Enterobacterales (91347)	Gammaproteobacteria (1236)	Proteobacteria (1224)	Bacteria (2)	6.53248	7.68655
NZ_CP046001.1	0.0909306	0	80	784	circular	2019-11-20	China:Henan	China,Henan	34	114	feces	swine	mixed culture	IncFIA(HI1)_1, AF250878, |IncFIB(K)_1, JN233704, |IncX1_1, EU370913,	IncF RST(F-:A18:B-):FIA(18);FIB(-);FIC(-);FII(-);FIIK(-);FIIS(-);FIIY(-)	73506	50.2802	Escherichia coli	Escherichia coli (562)	Escherichia (561)	Enterobacteriaceae (543)	Enterobacterales (91347)	Gammaproteobacteria (1236)	Proteobacteria (1224)	Bacteria (2)	4.9411	5.107
NZ_CP018714.1	0.0909306	0	80	785	circular	2016-12-20	Germany: Goettingen		51.5392	9.91156	abdominal drainage fluid	Homo sapiens		IncFIB(pNDM-Mar)_1, JN420336, |IncHI1B(pNDM-MAR)_1, JN420336,	IncF RST(F-:A-:B-):FIA(-);FIB(-);FIC(-);FII(-);FIIK(-);FIIS(-);FIIY(-)|IncHI1 MLST(-):HCM1_043(-);HCM1_064(-);HCM1_099(-);HCM1_116(-);HCM1_178ac(-);HCM1_259(-);(-)	246756	45.1174	Klebsiella pneumoniae	Klebsiella pneumoniae (573)	Klebsiella (570)	Enterobacteriaceae (543)	Enterobacterales (91347)	Gammaproteobacteria (1236)	Proteobacteria (1224)	Bacteria (2)	15.6249	-0.109052
NZ_CP018702.1	0.0909306	0	80	786	circular	2016-12-20	Germany: Goettingen		51.5392	9.91156	abdominal drainage fluid	Homo sapiens		IncHI1B(pNDM-MAR)_1, JN420336, |IncFIB(pNDM-Mar)_1, JN420336,	IncHI1 MLST(-):HCM1_043(-);HCM1_064(-);HCM1_099(-);HCM1_116(-);HCM1_178ac(-);HCM1_259(-);(-)|IncF RST(F-:A-:B-):FIA(-);FIB(-);FIC(-);FII(-);FIIK(-);FIIS(-);FIIY(-)	246753	45.1176	Klebsiella pneumoniae	Klebsiella pneumoniae (573)	Klebsiella (570)	Enterobacteriaceae (543)	Enterobacterales (91347)	Gammaproteobacteria (1236)	Proteobacteria (1224)	Bacteria (2)	15.6282	-0.107524
NZ_CP018720.1	0.0909306	0	80	787	circular	2016-12-20	Germany: Goettingen		51.5392	9.91156	anal swab	Homo sapiens		IncHI1B(pNDM-MAR)_1, JN420336, |IncFIB(pNDM-Mar)_1, JN420336,	IncHI1 MLST(-):HCM1_043(-);HCM1_064(-);HCM1_099(-);HCM1_116(-);HCM1_178ac(-);HCM1_259(-);(-)|IncF RST(F-:A-:B-):FIA(-);FIB(-);FIC(-);FII(-);FIIK(-);FIIS(-);FIIY(-)	246757	45.1177	Klebsiella pneumoniae	Klebsiella pneumoniae (573)	Klebsiella (570)	Enterobacteriaceae (543)	Enterobacterales (91347)	Gammaproteobacteria (1236)	Proteobacteria (1224)	Bacteria (2)	15.6291	-0.105665
NZ_CP056506.1	0.0909306	0	80	788	circular	2020-08-03	United Kingdom	United Kingdom	54.7024	-3.27658	Wastewater influent sample		culture			142000	49.7986	Citrobacter freundii	Citrobacter freundii (546)	Citrobacter (544)	Enterobacteriaceae (543)	Enterobacterales (91347)	Gammaproteobacteria (1236)	Proteobacteria (1224)	Bacteria (2)	5.20237	7.37893
NZ_CP017986.1	0.0909306	0	80	789	circular	2017-01-21	Germany: Goettingen		51.5392	9.91156	anal swab	Homo sapiens		IncHI1B(pNDM-MAR)_1, JN420336, |IncFIB(pNDM-Mar)_1, JN420336,	IncHI1 MLST(-):HCM1_043(-);HCM1_064(-);HCM1_099(-);HCM1_116(-);HCM1_178ac(-);HCM1_259(-);(-)|IncF RST(F-:A-:B-):FIA(-);FIB(-);FIC(-);FII(-);FIIK(-);FIIS(-);FIIY(-)	244706	45.1166	Klebsiella pneumoniae	Klebsiella pneumoniae (573)	Klebsiella (570)	Enterobacteriaceae (543)	Enterobacterales (91347)	Gammaproteobacteria (1236)	Proteobacteria (1224)	Bacteria (2)	15.6187	-0.114151
MK649825.1	0.0914855	0	79	790	circular	2019-10-12								IncFIB(pNDM-Mar)_1, JN420336, |IncHI1B(pNDM-MAR)_1, JN420336,	IncF RST(F-:A-:B-):FIA(-);FIB(-);FIC(-);FII(-);FIIK(-);FIIS(-);FIIY(-)|IncHI1 MLST(-):HCM1_043(-);HCM1_064(-);HCM1_099(-);HCM1_116(-);HCM1_178ac(-);HCM1_259(-);(-)	273676	46.5503	Klebsiella pneumoniae	Klebsiella pneumoniae (573)	Klebsiella (570)	Enterobacteriaceae (543)	Enterobacterales (91347)	Gammaproteobacteria (1236)	Proteobacteria (1224)	Bacteria (2)	15.6564	-0.0561726
NZ_CP062994.1	0.0914855	0	79	791	circular	2020-10-13	Russia: Moscow		55.76	37.62	sputum	Homo sapiens		IncHI1B(pNDM-MAR)_1, JN420336,	IncHI1 MLST(-):HCM1_043(-);HCM1_064(-);HCM1_099(-);HCM1_116(-);HCM1_178ac(-);HCM1_259(-);(-)	302447	47.4804	Klebsiella pneumoniae	Klebsiella pneumoniae (573)	Klebsiella (570)	Enterobacteriaceae (543)	Enterobacterales (91347)	Gammaproteobacteria (1236)	Proteobacteria (1224)	Bacteria (2)	15.6419	-0.0511357
NZ_CP059310.1	0.0914855	0	79	792	circular	2020-08-03	not applicable				not applicable	Homo sapiens		IncFIB(K)_1, JN233704, |IncFII(K)_1, CP000648,	IncF RST(K8:A-:B-):FIA(-);FIB(-);FIC(-);FII(-);FIIK(8);FIIS(-);FIIY(-)	151753	50.857	Klebsiella pneumoniae	Klebsiella pneumoniae (573)	Klebsiella (570)	Enterobacteriaceae (543)	Enterobacterales (91347)	Gammaproteobacteria (1236)	Proteobacteria (1224)	Bacteria (2)	5.96942	7.85535
NZ_CP032186.1	0.0914855	0	79	793	circular	2018-09-19	missing				missing	missing		IncFII(K)_1, CP000648, |IncFIB(K)_1, JN233704,	IncF RST(K5:A-:B-):FIA(-);FIB(-);FIC(-);FII(-);FIIK(5);FIIS(-);FIIY(-)	202373	52.7501	Klebsiella pneumoniae	Klebsiella pneumoniae (573)	Klebsiella (570)	Enterobacteriaceae (543)	Enterobacterales (91347)	Gammaproteobacteria (1236)	Proteobacteria (1224)	Bacteria (2)	6.50892	7.67246
NZ_CP018313.1	0.0914855	0	79	794	circular	2017-02-04	Germany: Goettingen		51.5392	9.9116	nose	Homo sapiens		IncFIB(pNDM-Mar)_1, JN420336, |IncHI1B(pNDM-MAR)_1, JN420336,	IncF RST(F-:A-:B-):FIA(-);FIB(-);FIC(-);FII(-);FIIK(-);FIIS(-);FIIY(-)|IncHI1 MLST(-):HCM1_043(-);HCM1_064(-);HCM1_099(-);HCM1_116(-);HCM1_178ac(-);HCM1_259(-);(-)	245975	45.0899	Klebsiella pneumoniae	Klebsiella pneumoniae (573)	Klebsiella (570)	Enterobacteriaceae (543)	Enterobacterales (91347)	Gammaproteobacteria (1236)	Proteobacteria (1224)	Bacteria (2)	15.6255	-0.105429
NZ_CP051549.1	0.0914855	0	79	795	linear	2020-05-01	United Arab Emirates: Ras Al Khaimah	United Arab Emirates,Ras Al Khaimah	25.7738	55.9382	rhizosphere	date palm	mixed culture	IncFIB(K)_1, JN233704,	IncF RST(F-:A-:B-):FIA(-);FIB(-);FIC(-);FII(-);FIIK(-);FIIS(-);FIIY(-)	104972	50.0686	Phytobacter diazotrophicus	Phytobacter diazotrophicus (395631)	Phytobacter (447792)	Enterobacteriaceae (543)	Enterobacterales (91347)	Gammaproteobacteria (1236)	Proteobacteria (1224)	Bacteria (2)	5.23215	7.3144
NZ_CP044301.1	0.0914855	0	79	796	circular	2019-12-21	Cambodia		11.5564	104.928	Pork			IncFIB(K)_1, JN233704, |IncFIA(HI1)_1, AF250878,	IncF RST(F-:A18:B-):FIA(18);FIB(-);FIC(-);FII(-);FIIK(-);FIIS(-);FIIY(-)	83169	51.7236	Escherichia coli	Escherichia coli (562)	Escherichia (561)	Enterobacteriaceae (543)	Enterobacterales (91347)	Gammaproteobacteria (1236)	Proteobacteria (1224)	Bacteria (2)	4.9231	5.08526
NZ_CP047092.1	0.0914855	0	79	797	circular	2020-01-26	China:Henan	China,Henan	34	114		pig	genomic DNA	IncFIB(K)_1, JN233704, |IncFIA(HI1)_1, AF250878,	IncF RST(F-:A18:B-):FIA(18);FIB(-);FIC(-);FII(-);FIIK(-);FIIS(-);FIIY(-)	77279	50.9802	Salmonella sp. S13	Salmonella sp. S13 (2686305)	Salmonella (590)	Enterobacteriaceae (543)	Enterobacterales (91347)	Gammaproteobacteria (1236)	Proteobacteria (1224)	Bacteria (2)	4.92629	5.08044
NZ_CP056169.1	0.0920479	0	78	798	circular	2020-08-03	United Kingdom	United Kingdom	54.7024	-3.27658	Wastewater effluent sample		culture	IncFII(pECLA)_1, CP001919, |IncFIB(pECLA)_1, CP001919,	IncF RST(F-:A-:B-):FIA(-);FIB(-);FIC(-);FII(-);FIIK(-);FIIS(-);FIIY(-)	197969	53.4912	Enterobacter roggenkampii	Enterobacter roggenkampii (1812935)	Enterobacter (547)	Enterobacteriaceae (543)	Enterobacterales (91347)	Gammaproteobacteria (1236)	Proteobacteria (1224)	Bacteria (2)	4.85654	7.14299
NZ_MG462728.1	0.0920479	0	78	799	circular	2020-06-03								IncFIB(K)_1, JN233704, |IncFII(K)_1, CP000648,	IncF RST(K1:A-:B-):FIA(-);FIB(-);FIC(-);FII(-);FIIK(1);FIIS(-);FIIY(-)	190059	51.192	Escherichia coli	Escherichia coli (562)	Escherichia (561)	Enterobacteriaceae (543)	Enterobacterales (91347)	Gammaproteobacteria (1236)	Proteobacteria (1224)	Bacteria (2)	5.99071	7.90142
NC_013285.1	0.0920479	0	78	800	circular	2009-10-02								IncFIB(pCTU3)_1, FN543096,	IncF RST(F-:A-:B-):FIA(-);FIB(-);FIC(-);FII(-);FIIK(-);FIIS(-);FIIY(-)	53842	50.039	Cronobacter turicensis z3032	Cronobacter turicensis (413502)	Cronobacter (413496)	Enterobacteriaceae (543)	Enterobacterales (91347)	Gammaproteobacteria (1236)	Proteobacteria (1224)	Bacteria (2)	5.18067	7.43432
NZ_CP011050.1	0.0920479	0	78	801	circular	2015-05-06	USA:Tennessee		36.17	-86.77	primary hospital lab	infants		IncFIB(pCTU3)_1, FN543096,	IncF RST(F-:A-:B-):FIA(-);FIB(-);FIC(-);FII(-);FIIK(-);FIIS(-);FIIY(-)	53457	50.0701	Cronobacter sakazakii	Cronobacter sakazakii (28141)	Cronobacter (413496)	Enterobacteriaceae (543)	Enterobacterales (91347)	Gammaproteobacteria (1236)	Proteobacteria (1224)	Bacteria (2)	5.21118	7.41229
NZ_MK656937.1	0.0920479	0	78	802	circular	2020-06-04								IncX1_1, EU370913, |IncFIA(HI1)_1, AF250878, |IncFIB(K)_1, JN233704,	IncF RST(F-:A18:B-):FIA(18);FIB(-);FIC(-);FII(-);FIIK(-);FIIS(-);FIIY(-)	79293	49.7307	Escherichia coli	Escherichia coli (562)	Escherichia (561)	Enterobacteriaceae (543)	Enterobacterales (91347)	Gammaproteobacteria (1236)	Proteobacteria (1224)	Bacteria (2)	4.92632	5.06111
NZ_LR025089.1	0.0920479	0	78	803	circular	2019-01-29								IncFII(K)_1, CP000648, |IncFIB(K)_1, JN233704,	IncF RST(K5:A-:B-):FIA(-);FIB(-);FIC(-);FII(-);FIIK(5);FIIS(-);FIIY(-)	220174	52.8069	Klebsiella pneumoniae	Klebsiella pneumoniae (573)	Klebsiella (570)	Enterobacteriaceae (543)	Enterobacterales (91347)	Gammaproteobacteria (1236)	Proteobacteria (1224)	Bacteria (2)	6.53706	7.67266
NZ_CP021699.1	0.0920479	0	78	804	circular	2017-06-10	missing				missing	missing		IncFIB(pNDM-Mar)_1, JN420336, |IncHI1B(pNDM-MAR)_1, JN420336,	IncF RST(F-:A-:B-):FIA(-);FIB(-);FIC(-);FII(-);FIIK(-);FIIS(-);FIIY(-)|IncHI1 MLST(-):HCM1_043(-);HCM1_064(-);HCM1_099(-);HCM1_116(-);HCM1_178ac(-);HCM1_259(-);(-)	354705	47.8519	Klebsiella pneumoniae	Klebsiella pneumoniae (573)	Klebsiella (570)	Enterobacteriaceae (543)	Enterobacterales (91347)	Gammaproteobacteria (1236)	Proteobacteria (1224)	Bacteria (2)	15.6542	-0.0741789
NZ_CP056777.1	0.0920479	0	78	805	circular	2020-06-30	unknown				unknown		bacterial culture	Col(pHAD28)_1, KU674895, |IncFII(pECLA)_1, CP001919, |IncFIB(pECLA)_1, CP001919,	IncF RST(F-:A-:B-):FIA(-);FIB(-);FIC(-);FII(-);FIIK(-);FIIS(-);FIIY(-)	199561	52.4632	Enterobacter cloacae	Enterobacter cloacae (550)	Enterobacter (547)	Enterobacteriaceae (543)	Enterobacterales (91347)	Gammaproteobacteria (1236)	Proteobacteria (1224)	Bacteria (2)	4.91181	7.17672
NZ_CP011314.1	0.0920479	0	78	806	circular	2015-05-06	Germany	Germany	51.0834	10.4234		Homo sapiens	cell culture	IncQ1_1, M28829, |IncFIB(pNDM-Mar)_1, JN420336, |IncHI1B(pNDM-MAR)_1, JN420336,	IncF RST(F-:A-:B-):FIA(-);FIB(-);FIC(-);FII(-);FIIK(-);FIIS(-);FIIY(-)|IncHI1 MLST(-):HCM1_043(-);HCM1_064(-);HCM1_099(-);HCM1_116(-);HCM1_178ac(-);HCM1_259(-);(-)	361964	47.9981	Klebsiella pneumoniae subsp. pneumoniae	Klebsiella pneumoniae (573)	Klebsiella (570)	Enterobacteriaceae (543)	Enterobacterales (91347)	Gammaproteobacteria (1236)	Proteobacteria (1224)	Bacteria (2)	15.6483	-0.0713478
NZ_LR025093.1	0.0920479	0	78	807	circular	2019-01-29								IncFIB(K)_1, JN233704, |IncFII(K)_1, CP000648,	IncF RST(K5:A-:B-):FIA(-);FIB(-);FIC(-);FII(-);FIIK(5);FIIS(-);FIIY(-)	231732	52.6466	Klebsiella pneumoniae	Klebsiella pneumoniae (573)	Klebsiella (570)	Enterobacteriaceae (543)	Enterobacterales (91347)	Gammaproteobacteria (1236)	Proteobacteria (1224)	Bacteria (2)	6.52906	7.67861
NZ_CP022824.1	0.0920479	0	78	808	circular	2017-08-27	USA: Houston		29.7107	-95.4006	wound	Homo sapiens		IncFIB(K)_1, JN233704,	IncF RST(F-:A-:B-):FIA(-);FIB(-);FIC(-);FII(-);FIIK(-);FIIS(-);FIIY(-)	240771	53.4363	Klebsiella quasivariicola	Klebsiella quasivariicola (2026240)	Klebsiella (570)	Enterobacteriaceae (543)	Enterobacterales (91347)	Gammaproteobacteria (1236)	Proteobacteria (1224)	Bacteria (2)	5.93185	7.87843
NZ_CP035380.1	0.0920479	0	78	809	circular	2019-07-17	China:Wenzhou	China,Wenzhou	28.0153	120.656			single culture			108995	50.1381	Leclercia adecarboxylata	Leclercia adecarboxylata (83655)	Leclercia (83654)	Enterobacteriaceae (543)	Enterobacterales (91347)	Gammaproteobacteria (1236)	Proteobacteria (1224)	Bacteria (2)	5.1362	7.2583
NZ_CP031735.1	0.0920479	0	78	810	circular	2018-09-02	Korea: Seoul		37.4981	127.076	blood	Homo sapiens		IncFII(K)_1, CP000648, |IncFIB(K)_1, JN233704,	IncF RST(K5:A-:B-):FIA(-);FIB(-);FIC(-);FII(-);FIIK(5);FIIS(-);FIIY(-)	253531	51.2233	Klebsiella pneumoniae subsp. pneumoniae	Klebsiella pneumoniae (573)	Klebsiella (570)	Enterobacteriaceae (543)	Enterobacterales (91347)	Gammaproteobacteria (1236)	Proteobacteria (1224)	Bacteria (2)	6.27153	7.81483
NZ_CP041640.1	0.0920479	0	78	811	circular	2019-08-12	Viet Nam: Ho Chi Minh	Viet Nam,Ho Chi Minh	10.7758	106.702		Homo sapiens	sputum	IncFIB(K)_1, JN233704, |IncFII(K)_1, CP000648,	IncF RST(K5:A-:B-):FIA(-);FIB(-);FIC(-);FII(-);FIIK(5);FIIS(-);FIIY(-)	222330	52.7108	Klebsiella pneumoniae	Klebsiella pneumoniae (573)	Klebsiella (570)	Enterobacteriaceae (543)	Enterobacterales (91347)	Gammaproteobacteria (1236)	Proteobacteria (1224)	Bacteria (2)	6.52698	7.68082
LR890313.1	0.0920479	0	78	812	circular	2020-10-30								IncFIB(pNDM-Mar)_1, JN420336, |IncHI1B(pNDM-MAR)_1, JN420336,	IncF RST(F-:A-:B-):FIA(-);FIB(-);FIC(-);FII(-);FIIK(-);FIIS(-);FIIY(-)|IncHI1 MLST(-):HCM1_043(-);HCM1_064(-);HCM1_099(-);HCM1_116(-);HCM1_178ac(-);HCM1_259(-);(-)	201460	44.4858	Klebsiella oxytoca	Klebsiella oxytoca (571)	Klebsiella (570)	Enterobacteriaceae (543)	Enterobacterales (91347)	Gammaproteobacteria (1236)	Proteobacteria (1224)	Bacteria (2)	15.6486	-0.0912298
NC_016966.1	0.0920479	0	78	813	circular	2012-03-13								IncFIB(K)_1, JN233704, |IncFII(K)_1, CP000648,	IncF RST(K5:A-:B-):FIA(-);FIB(-);FIC(-);FII(-);FIIK(5);FIIS(-);FIIY(-)	220824	52.8185	Klebsiella pneumoniae	Klebsiella pneumoniae (573)	Klebsiella (570)	Enterobacteriaceae (543)	Enterobacterales (91347)	Gammaproteobacteria (1236)	Proteobacteria (1224)	Bacteria (2)	6.56526	7.65215
NZ_CP029591.1	0.0920479	0	78	814	circular	2018-06-02	Sweden	Sweden	59.675	14.5209		Homo sapiens	unknown	IncFII(K)_1, CP000648, |IncFIB(K)_1, JN233704,	IncF RST(K5:A-:B-):FIA(-);FIB(-);FIC(-);FII(-);FIIK(5);FIIS(-);FIIY(-)	219996	52.8214	Klebsiella pneumoniae	Klebsiella pneumoniae (573)	Klebsiella (570)	Enterobacteriaceae (543)	Enterobacterales (91347)	Gammaproteobacteria (1236)	Proteobacteria (1224)	Bacteria (2)	6.52195	7.67715
NZ_CP013942.1	0.0920479	0	78	815	circular	2016-01-16	USA	USA	39.7837	-100.446	breast abscess			IncFIB(pCTU3)_1, FN543096,	IncF RST(F-:A-:B-):FIA(-);FIB(-);FIC(-);FII(-);FIIK(-);FIIS(-);FIIY(-)	52622	50.2508	Cronobacter malonaticus LMG 23826	Cronobacter malonaticus (413503)	Cronobacter (413496)	Enterobacteriaceae (543)	Enterobacterales (91347)	Gammaproteobacteria (1236)	Proteobacteria (1224)	Bacteria (2)	5.24708	7.42766
NZ_CP028954.1	0.0920479	0	78	816	circular	2018-04-28	missing				missing	missing		IncFII(K)_1, CP000648, |IncFIB(K)_1, JN233704,	IncF RST(K2:A-:B-):FIA(-);FIB(-);FIC(-);FII(-);FIIK(2);FIIS(-);FIIY(-)	214704	51.6055	Klebsiella pneumoniae	Klebsiella pneumoniae (573)	Klebsiella (570)	Enterobacteriaceae (543)	Enterobacterales (91347)	Gammaproteobacteria (1236)	Proteobacteria (1224)	Bacteria (2)	5.82652	8.23766
NC_014107.1	0.0920479	0	78	817	circular	2010-05-04								IncFII(pECLA)_1, CP001919, |IncFIB(pECLA)_1, CP001919, |Col(pHAD28)_1, KU674895,	IncF RST(F-:A-:B-):FIA(-);FIB(-);FIC(-);FII(-);FIIK(-);FIIS(-);FIIY(-)	199562	52.4669	Enterobacter cloacae subsp. cloacae ATCC 13047	Enterobacter cloacae (550)	Enterobacter (547)	Enterobacteriaceae (543)	Enterobacterales (91347)	Gammaproteobacteria (1236)	Proteobacteria (1224)	Bacteria (2)	4.87204	7.14016
MN543576.1	0.0920479	0	78	818	circular	2020-06-12								IncFIB(pNDM-Mar)_1, JN420336,	IncF RST(F-:A-:B-):FIA(-);FIB(-);FIC(-);FII(-);FIIK(-);FIIS(-);FIIY(-)	284388	45.8332	Klebsiella pneumoniae	Klebsiella pneumoniae (573)	Klebsiella (570)	Enterobacteriaceae (543)	Enterobacterales (91347)	Gammaproteobacteria (1236)	Proteobacteria (1224)	Bacteria (2)	15.5014	0.364566
NZ_CP029588.1	0.0920479	0	78	819	circular	2018-06-02	Sweden	Sweden	59.675	14.5209		Homo sapiens	unknown	IncFII(K)_1, CP000648, |IncFIB(K)_1, JN233704,	IncF RST(K5:A-:B-):FIA(-);FIB(-);FIC(-);FII(-);FIIK(5);FIIS(-);FIIY(-)	216772	52.6678	Klebsiella pneumoniae	Klebsiella pneumoniae (573)	Klebsiella (570)	Enterobacteriaceae (543)	Enterobacterales (91347)	Gammaproteobacteria (1236)	Proteobacteria (1224)	Bacteria (2)	6.51973	7.67598
NZ_LT994840.1	0.0926182	0	77	820	circular	2018-06-30					urine			IncFIB(K)_1, JN233704, |IncFII(K)_1, CP000648,	IncF RST(K5:A-:B-):FIA(-);FIB(-);FIC(-);FII(-);FIIK(5);FIIS(-);FIIY(-)	218098	52.7341	Klebsiella pneumoniae	Klebsiella pneumoniae (573)	Klebsiella (570)	Enterobacteriaceae (543)	Enterobacterales (91347)	Gammaproteobacteria (1236)	Proteobacteria (1224)	Bacteria (2)	6.53654	7.6704
NZ_CP056217.1	0.0926182	0	77	821	circular	2020-08-03	United Kingdom	United Kingdom	54.7024	-3.27658	Wastewater influent sample		culture	IncFIB(K)_1, JN233704, |IncFII(K)_1, CP000648,	IncF RST(K1:A-:B-):FIA(-);FIB(-);FIC(-);FII(-);FIIK(1);FIIS(-);FIIY(-)	144961	52.4624	Klebsiella pneumoniae	Klebsiella pneumoniae (573)	Klebsiella (570)	Enterobacteriaceae (543)	Enterobacterales (91347)	Gammaproteobacteria (1236)	Proteobacteria (1224)	Bacteria (2)	6.03107	7.80014
NZ_CP059713.1	0.0926182	0	77	822	circular	2020-08-12	China: Hangzhou		30.3	120.2	blood	Homo sapiens		IncFII(pECLA)_1, CP001919, |IncFIB(pECLA)_1, CP001919,	IncF RST(F-:A-:B-):FIA(-);FIB(-);FIC(-);FII(-);FIIK(-);FIIS(-);FIIY(-)	76436	54.9558	Enterobacter hormaechei	Enterobacter hormaechei (158836)	Enterobacter (547)	Enterobacteriaceae (543)	Enterobacterales (91347)	Gammaproteobacteria (1236)	Proteobacteria (1224)	Bacteria (2)	4.92739	7.2362
NZ_CP029143.1	0.0926182	0	77	823	circular	2018-05-02	missing				missing	missing		IncFII(pKP91)_1, CP000966, |IncFIA(HI1)_1, AF250878,	IncF RST(K28:A-:B-):FIA(21?);FIB(-);FIC(-);FII(-);FIIK(28);FIIS(-);FIIY(10?)	134879	51.5855	Klebsiella michiganensis	Klebsiella michiganensis (1134687)	Klebsiella (570)	Enterobacteriaceae (543)	Enterobacterales (91347)	Gammaproteobacteria (1236)	Proteobacteria (1224)	Bacteria (2)	5.4687	7.50899
CP056626.1	0.0926182	0	77	824	circular	2020-07-27	United Kingdom	United Kingdom	54.7024	-3.27658	Wastewater influent sample		culture	IncFIB(K)_1, JN233704,	IncF RST(F-:A-:B-):FIA(-);FIB(-);FIC(-);FII(-);FIIK(-);FIIS(-);FIIY(-)	153071	50.295	Escherichia coli	Escherichia coli (562)	Escherichia (561)	Enterobacteriaceae (543)	Enterobacterales (91347)	Gammaproteobacteria (1236)	Proteobacteria (1224)	Bacteria (2)	4.94264	6.50504
NZ_CP031818.1	0.0926182	0	77	825	circular	2018-09-26								Col440I_1, CP023920, |IncFIB(pNDM-Mar)_1, JN420336,	IncF RST(F-:A-:B-):FIA(-);FIB(-);FIC(-);FII(-);FIIK(-);FIIS(-);FIIY(-)	430829	47.9958	Klebsiella pneumoniae	Klebsiella pneumoniae (573)	Klebsiella (570)	Enterobacteriaceae (543)	Enterobacterales (91347)	Gammaproteobacteria (1236)	Proteobacteria (1224)	Bacteria (2)	15.6198	-0.0090665
NZ_CP053729.1	0.0926182	0	77	826	circular	2020-06-02	China: Sichuan	China,Sichuan	30.5	102.5	slaughterhouse	pig	cell culture	IncFIB(K)_1, JN233704, |IncN_1, AY046276,	IncF RST(F-:A-:B-):FIA(-);FIB(-);FIC(-);FII(-);FIIK(-);FIIS(-);FIIY(-)|IncN MLST(-):repN(1);traJ(-);korA(-)	92076	51.5389	Escherichia coli	Escherichia coli (562)	Escherichia (561)	Enterobacteriaceae (543)	Enterobacterales (91347)	Gammaproteobacteria (1236)	Proteobacteria (1224)	Bacteria (2)	4.92414	5.07461
NZ_CP060423.1	0.0931964	0	76	827	circular	2020-06-01	India		12.9246	79.1348	blood	Homo sapiens		IncR_1, DQ449578,		74731	50.0234	Klebsiella pneumoniae	Klebsiella pneumoniae (573)	Klebsiella (570)	Enterobacteriaceae (543)	Enterobacterales (91347)	Gammaproteobacteria (1236)	Proteobacteria (1224)	Bacteria (2)	4.42323	5.52046
NZ_CP041453.1	0.0931964	0	76	828	circular	2019-10-07	China: Yangzhou		32.24	119.26	Pork			IncFIB(K)_1, JN233704, |IncFIA(HI1)_1, AF250878, |IncX1_1, EU370913,	IncF RST(F-:A18:B-):FIA(18);FIB(-);FIC(-);FII(-);FIIK(-);FIIS(-);FIIY(-)	92973	49.3315	Escherichia coli	Escherichia coli (562)	Escherichia (561)	Enterobacteriaceae (543)	Enterobacterales (91347)	Gammaproteobacteria (1236)	Proteobacteria (1224)	Bacteria (2)	4.93569	5.06425
NZ_CP056456.1	0.0931964	0	76	829	circular	2020-08-03	United Kingdom	United Kingdom	54.7024	-3.27658	Freshwater sample from downstream of wastewater treatment plant		culture	IncFII(pECLA)_1, CP001919, |IncFIB(pECLA)_1, CP001919,	IncF RST(F-:A-:B-):FIA(-);FIB(-);FIC(-);FII(-);FIIK(-);FIIS(-);FIIY(-)	111966	52.9857	Enterobacter hormaechei	Enterobacter hormaechei (158836)	Enterobacter (547)	Enterobacteriaceae (543)	Enterobacterales (91347)	Gammaproteobacteria (1236)	Proteobacteria (1224)	Bacteria (2)	4.97745	7.17522
MF116002.1	0.0931964	0	76	830	circular	2017-07-15								IncFIB(K)_1, JN233704, |IncFII(K)_1, CP000648,	IncF RST(K7:A-:B-):FIA(-);FIB(-);FIC(-);FII(-);FIIK(7);FIIS(-);FIIY(-)	198388	51.6629	uncultured bacterium	uncultured bacterium (77133)						Bacteria (2)	5.84279	8.41253
NZ_CP050379.1	0.0931964	0	76	831	circular	2020-04-01	Czech Republic: Prague		50.07	14.43	Rectal swab	Homo sapiens		IncFIB(K)_1, JN233704, |IncFII(K)_1, CP000648,	IncF RST(K5:A-:B-):FIA(-);FIB(-);FIC(-);FII(-);FIIK(5);FIIS(-);FIIY(-)	225540	52.3583	Klebsiella pneumoniae	Klebsiella pneumoniae (573)	Klebsiella (570)	Enterobacteriaceae (543)	Enterobacterales (91347)	Gammaproteobacteria (1236)	Proteobacteria (1224)	Bacteria (2)	6.55516	7.67644
NZ_CP030920.1	0.0931964	0	76	832	circular	2018-07-11	Slovakia: Department of Urology, University Hospital, Bratislava		48.1675	17.0878	missing	Homo sapiens		IncFIB(K)_1, JN233704, |IncHI2_1, BX664015,	IncF RST(F-:A-:B-):FIA(-);FIB(-);FIC(-);FII(-);FIIK(-);FIIS(-);FIIY(-)|IncHI2 DLST(-):smr0018(-);smr0199(-);(-);(-);(-);(-);(-)	259094	52.5612	Escherichia coli	Escherichia coli (562)	Escherichia (561)	Enterobacteriaceae (543)	Enterobacterales (91347)	Gammaproteobacteria (1236)	Proteobacteria (1224)	Bacteria (2)	-3.22421	14.7624
LR890447.1	0.0931964	0	76	833	circular	2020-10-30								IncFIB(K)_1, JN233704, |IncFII(K)_1, CP000648,	IncF RST(K8:A-:B-):FIA(-);FIB(-);FIC(-);FII(-);FIIK(8);FIIS(-);FIIY(-)	158730	51.2354	Klebsiella pneumoniae	Klebsiella pneumoniae (573)	Klebsiella (570)	Enterobacteriaceae (543)	Enterobacterales (91347)	Gammaproteobacteria (1236)	Proteobacteria (1224)	Bacteria (2)	5.98743	7.77637
NZ_CP041949.1	0.0931964	0	76	834	circular	2019-12-01	USA:Houston		29.7125	-95.3977	urine	Homo sapiens		IncFIB(K)_1, JN233704, |IncFII(K)_1, CP000648,	IncF RST(K5:A-:B-):FIA(-);FIB(-);FIC(-);FII(-);FIIK(5);FIIS(-);FIIY(-)	174723	52.5981	Klebsiella pneumoniae	Klebsiella pneumoniae (573)	Klebsiella (570)	Enterobacteriaceae (543)	Enterobacterales (91347)	Gammaproteobacteria (1236)	Proteobacteria (1224)	Bacteria (2)	6.56023	7.64562
NZ_CP058150.1	0.0931964	0	76	835	circular	2020-07-30	United Kingdom	United Kingdom	54.7024	-3.27658	Freshwater sample from downstream of wastewater treatment plant		culture	IncFII(pECLA)_1, CP001919, |IncFIB(pECLA)_1, CP001919,	IncF RST(F-:A-:B-):FIA(-);FIB(-);FIC(-);FII(-);FIIK(-);FIIS(-);FIIY(-)	111966	52.9857	Enterobacter hormaechei	Enterobacter hormaechei (158836)	Enterobacter (547)	Enterobacteriaceae (543)	Enterobacterales (91347)	Gammaproteobacteria (1236)	Proteobacteria (1224)	Bacteria (2)	4.97942	7.16744
NZ_CP015135.1	0.0931964	0	76	836	circular	2017-01-08	missing							IncFII(K)_1, CP000648, |IncFIB(K)_1, JN233704,	IncF RST(K8:A-:B-):FIA(-);FIB(-);FIC(-);FII(-);FIIK(8);FIIS(-);FIIY(-)	158741	51.2426	Klebsiella pneumoniae	Klebsiella pneumoniae (573)	Klebsiella (570)	Enterobacteriaceae (543)	Enterobacterales (91347)	Gammaproteobacteria (1236)	Proteobacteria (1224)	Bacteria (2)	5.98608	7.77383
NZ_CP042500.1	0.0931964	0	76	837	circular	2019-10-13	Australia: Sydney	Australia,Sydney	-33.8548	151.216	Shower 3		Whole organism			148871	53.2327	Enterobacter sp. E76	Enterobacter sp. E76 (2596949)	Enterobacter (547)	Enterobacteriaceae (543)	Enterobacterales (91347)	Gammaproteobacteria (1236)	Proteobacteria (1224)	Bacteria (2)	5.33187	7.44263
NZ_CP056721.1	0.0937829	0	75	838	circular	2020-08-03	United Kingdom	United Kingdom	54.7024	-3.27658	Wastewater effluent sample		culture	IncFII(pECLA)_1, CP001919, |IncFIB(pECLA)_1, CP001919,	IncF RST(F-:A-:B-):FIA(-);FIB(-);FIC(-);FII(-);FIIK(-);FIIS(-);FIIY(-)	118204	52.8459	Enterobacter hormaechei	Enterobacter hormaechei (158836)	Enterobacter (547)	Enterobacteriaceae (543)	Enterobacterales (91347)	Gammaproteobacteria (1236)	Proteobacteria (1224)	Bacteria (2)	4.99983	7.20301
NZ_CP020848.1	0.0937829	0	75	839	circular	2017-05-25	USA: Houston		29.7107	-95.4006	urine	Homo sapiens		IncHI1B(pNDM-MAR)_1, JN420336, |IncFIB(pNDM-Mar)_1, JN420336,	IncHI1 MLST(-):HCM1_043(-);HCM1_064(-);HCM1_099(-);HCM1_116(-);HCM1_178ac(-);HCM1_259(-);(-)|IncF RST(F-:A-:B-):FIA(-);FIB(-);FIC(-);FII(-);FIIK(-);FIIS(-);FIIY(-)	347748	47.3024	Klebsiella variicola	Klebsiella variicola (244366)	Klebsiella (570)	Enterobacteriaceae (543)	Enterobacterales (91347)	Gammaproteobacteria (1236)	Proteobacteria (1224)	Bacteria (2)	15.6561	-0.0715526
NZ_CP012256.1	0.0937829	0	75	840	circular	2015-09-03	United Kingdom	United Kingdom	54.7024	-3.27658	milk			IncFIB(pCTU3)_1, FN543096,	IncF RST(F-:A-:B-):FIA(-);FIB(-);FIC(-);FII(-);FIIK(-);FIIS(-);FIIY(-)	53383	49.2516	Cronobacter sakazakii	Cronobacter sakazakii (28141)	Cronobacter (413496)	Enterobacteriaceae (543)	Enterobacterales (91347)	Gammaproteobacteria (1236)	Proteobacteria (1224)	Bacteria (2)	5.17999	7.38344
NZ_CP016810.1	0.0943778	0	74	841	circular	2016-08-21	USA: California	USA,California	36.7015	-118.756	urine	Homo sapiens		IncFIB(pQil)_1, JN233705, |IncFII(K)_1, CP000648, |IncFIB(K)_1, JN233704,	IncF RST(K2:A-:B-):FIA(-);FIB(-);FIC(-);FII(-);FIIK(2);FIIS(-);FIIY(-)	307743	51.7448	Klebsiella pneumoniae	Klebsiella pneumoniae (573)	Klebsiella (570)	Enterobacteriaceae (543)	Enterobacterales (91347)	Gammaproteobacteria (1236)	Proteobacteria (1224)	Bacteria (2)	5.84222	8.20059
NZ_CP032356.1	0.0943778	0	74	842	circular	2019-01-16	China	China	34.4118	86.0327		Homo sapiens	organism	IncFIB(pNDM-Mar)_1, JN420336,	IncF RST(F-:A-:B-):FIA(-);FIB(-);FIC(-);FII(-);FIIK(-);FIIS(-);FIIY(-)	282290	45.7406	Klebsiella variicola	Klebsiella variicola (244366)	Klebsiella (570)	Enterobacteriaceae (543)	Enterobacterales (91347)	Gammaproteobacteria (1236)	Proteobacteria (1224)	Bacteria (2)	15.4894	0.391885
NZ_CP042883.1	0.0943778	0	74	843	circular	2020-06-07	Norway:Aas		59.667	10.768	surface water			IncFIB(K)_1, JN233704, |IncFII(K)_1, CP000648,	IncF RST(K5:A-:B-):FIA(-);FIB(-);FIC(-);FII(-);FIIK(5);FIIS(-);FIIY(-)	194856	52.1878	Klebsiella pneumoniae	Klebsiella pneumoniae (573)	Klebsiella (570)	Enterobacteriaceae (543)	Enterobacterales (91347)	Gammaproteobacteria (1236)	Proteobacteria (1224)	Bacteria (2)	6.51612	7.68664
NZ_CP023723.1	0.0943778	0	74	844	circular	2018-06-13	Taiwan: Taipei		25.1195	121.52	intraabdominal abscess	Homo sapiens		IncHI1B(pNDM-MAR)_1, JN420336, |IncFIB(pNDM-Mar)_1, JN420336,	IncHI1 MLST(-):HCM1_043(-);HCM1_064(-);HCM1_099(-);HCM1_116(-);HCM1_178ac(-);HCM1_259(-);(-)|IncF RST(F-:A-:B-):FIA(-);FIB(-);FIC(-);FII(-);FIIK(-);FIIS(-);FIIY(-)	297984	46.4431	Klebsiella pneumoniae	Klebsiella pneumoniae (573)	Klebsiella (570)	Enterobacteriaceae (543)	Enterobacterales (91347)	Gammaproteobacteria (1236)	Proteobacteria (1224)	Bacteria (2)	15.6449	-0.0310476
NZ_CP057314.1	0.0943778	0	74	845	circular	2020-08-04	United Kingdom	United Kingdom	54.7024	-3.27658	Pooled pig faecal samples collected from floor of farm		culture	IncFIB(pNDM-Mar)_1, JN420336, |IncHI1B(pNDM-MAR)_1, JN420336,	IncF RST(F-:A-:B-):FIA(-);FIB(-);FIC(-);FII(-);FIIK(-);FIIS(-);FIIY(-)|IncHI1 MLST(-):HCM1_043(-);HCM1_064(-);HCM1_099(-);HCM1_116(-);HCM1_178ac(-);HCM1_259(-);(-)	194082	44.6687	Klebsiella pneumoniae	Klebsiella pneumoniae (573)	Klebsiella (570)	Enterobacteriaceae (543)	Enterobacterales (91347)	Gammaproteobacteria (1236)	Proteobacteria (1224)	Bacteria (2)	15.6491	-0.0848398
NZ_LR134252.1	0.0943778	0	74	846	circular	2018-12-19								IncFII(pKP91)_1, CP000966, |IncFIB(K)_1, JN233704,	IncF RST(F-:A-:B-):FIA(-);FIB(-);FIC(-);FII(-);FIIK(28?);FIIS(-);FIIY(-)	276068	51.6271	Raoultella terrigena	Raoultella terrigena (577)	Raoultella (160674)	Enterobacteriaceae (543)	Enterobacterales (91347)	Gammaproteobacteria (1236)	Proteobacteria (1224)	Bacteria (2)	5.56508	7.3508
NZ_CP011990.1	0.0943778	0	74	847	circular	2015-08-13								IncFII(K)_1, CP000648, |IncR_1, DQ449578,	IncF RST(K1:A-:B-):FIA(-);FIB(-);FIC(-);FII(-);FIIK(1);FIIS(-);FIIY(-)	162533	53.73	Klebsiella pneumoniae UHKPC33	Klebsiella pneumoniae (573)	Klebsiella (570)	Enterobacteriaceae (543)	Enterobacterales (91347)	Gammaproteobacteria (1236)	Proteobacteria (1224)	Bacteria (2)	5.95652	7.90386
NZ_CP032995.1	0.0949813	0	73	848	circular	2018-10-23	China: Chengdu		30.6289	104.089	Jin River water W5		cell culture	IncN_1, AY046276, |IncFIA(HI1)_1, AF250878, |IncFIB(K)_1, JN233704,	IncN MLST(-):repN(1);traJ(-);korA(-)|IncF RST(F-:A18:B-):FIA(18);FIB(-);FIC(-);FII(-);FIIK(-);FIIS(-);FIIY(-)	72717	51.5189	Escherichia coli	Escherichia coli (562)	Escherichia (561)	Enterobacteriaceae (543)	Enterobacterales (91347)	Gammaproteobacteria (1236)	Proteobacteria (1224)	Bacteria (2)	4.95372	5.10966
CP052479.1	0.0949813	0	73	849	circular	2020-05-04	South Korea: Gangwon		37.82	128.16	blood	Homo sapiens		IncR_1, DQ449578, |IncFIA(HI1)_1, AF250878,	IncF RST(F-:A13:B-):FIA(13);FIB(-);FIC(-);FII(-);FIIK(-);FIIS(-);FIIY(-)	62715	52.0418	Klebsiella pneumoniae	Klebsiella pneumoniae (573)	Klebsiella (570)	Enterobacteriaceae (543)	Enterobacterales (91347)	Gammaproteobacteria (1236)	Proteobacteria (1224)	Bacteria (2)	4.43301	5.57813
NZ_CP043516.1	0.0949813	0	73	850	circular	2019-09-14	United Kingdom:London	United Kingdom,London	51.5073	-0.127647	screening swab	Homo sapiens	pure culture	IncN3_1, EF219134,	IncN MLST(-):repN(-);traJ(-);korA(-);(-);(-);(-);(-)	56515	52.8709	Enterobacter kobei	Enterobacter kobei (208224)	Enterobacter (547)	Enterobacteriaceae (543)	Enterobacterales (91347)	Gammaproteobacteria (1236)	Proteobacteria (1224)	Bacteria (2)	3.30804	6.31896
NZ_CP056276.1	0.0949813	0	73	851	circular	2020-08-03	United Kingdom	United Kingdom	54.7024	-3.27658	Wastewater effluent sample		culture	IncFIB(pNDM-Mar)_1, JN420336,	IncF RST(F-:A-:B-):FIA(-);FIB(-);FIC(-);FII(-);FIIK(-);FIIS(-);FIIY(-)	248629	45.9987	Klebsiella pneumoniae	Klebsiella pneumoniae (573)	Klebsiella (570)	Enterobacteriaceae (543)	Enterobacterales (91347)	Gammaproteobacteria (1236)	Proteobacteria (1224)	Bacteria (2)	15.6169	-0.115275
CP056767.1	0.0949813	0	73	852	circular	2020-07-27	United Kingdom	United Kingdom	54.7024	-3.27658	Wastewater influent sample		culture	IncFII(pECLA)_1, CP001919, |IncFIB(pENTE01)_1, CP000654,	IncF RST(F-:A-:B-):FIA(-);FIB(-);FIC(-);FII(-);FIIK(-);FIIS(-);FIIY(-)	160042	53.9933	Enterobacter cloacae	Enterobacter cloacae (550)	Enterobacter (547)	Enterobacteriaceae (543)	Enterobacterales (91347)	Gammaproteobacteria (1236)	Proteobacteria (1224)	Bacteria (2)	5.00313	7.1805
CP028804.2	0.0949813	0	73	853	circular	2018-04-09	China: Sichuan, Chengdu	China,Sichuan,Chengdu	30.6766	104.061		Homo sapiens	culture	IncC_1, JN157804, |IncFIB(K)_1, JN233704, |IncFII(K)_1, CP000648,	IncF RST(K1:A-:B-):FIA(-);FIB(-);FIC(-);FII(-);FIIK(1);FIIS(-);FIIY(-)	323935	52.6081	Klebsiella pneumoniae	Klebsiella pneumoniae (573)	Klebsiella (570)	Enterobacteriaceae (543)	Enterobacterales (91347)	Gammaproteobacteria (1236)	Proteobacteria (1224)	Bacteria (2)	1.35611	9.53576
NZ_CP009116.1	0.0949813	0	73	854	circular	2015-01-21	USA: HHS Region 5		41	-81	clinical urine culture	Homo sapiens		IncR_1, DQ449578, |IncFIA(HI1)_1, AF250878,	IncF RST(F-:A13:B-):FIA(13);FIB(-);FIC(-);FII(-);FIIK(-);FIIS(-);FIIY(-)	94760	51.2906	Klebsiella pneumoniae	Klebsiella pneumoniae (573)	Klebsiella (570)	Enterobacteriaceae (543)	Enterobacterales (91347)	Gammaproteobacteria (1236)	Proteobacteria (1224)	Bacteria (2)	4.37843	5.59279
CP026198.1	0.0949813	0	73	855	circular	2018-01-29	USA		38.9847	-77.0947				IncN_1, AY046276,	IncN MLST(6):repN(2);traJ(4);korA(2)	174695	52.3301	Enterobacteriaceae bacterium ENNIH3	Enterobacteriaceae bacterium ENNIH3 (1920128)		Enterobacteriaceae (543)	Enterobacterales (91347)	Gammaproteobacteria (1236)	Proteobacteria (1224)	Bacteria (2)	3.56632	5.61055
NZ_CP058158.1	0.0949813	0	73	856	circular	2020-07-30	United Kingdom	United Kingdom	54.7024	-3.27658	Wastewater effluent sample		culture	IncFII(pECLA)_1, CP001919, |IncFIB(pECLA)_1, CP001919,	IncF RST(F-:A-:B-):FIA(-);FIB(-);FIC(-);FII(-);FIIK(-);FIIS(-);FIIY(-)	113610	53.1643	Enterobacter hormaechei	Enterobacter hormaechei (158836)	Enterobacter (547)	Enterobacteriaceae (543)	Enterobacterales (91347)	Gammaproteobacteria (1236)	Proteobacteria (1224)	Bacteria (2)	4.99489	7.17114
NZ_CP006642.1	0.0949813	0	73	857	circular	2015-06-22								IncFIB(K)_1, JN233704, |IncN_1, AY046276, |IncX1_1, EU370913,	IncF RST(F-:A-:B-):FIA(-);FIB(-);FIC(-);FII(-);FIIK(-);FIIS(-);FIIY(-)|IncN MLST(-):repN(1);traJ(-);korA(-)	145722	51.0184	Escherichia coli PCN061	Escherichia coli (562)	Escherichia (561)	Enterobacteriaceae (543)	Enterobacterales (91347)	Gammaproteobacteria (1236)	Proteobacteria (1224)	Bacteria (2)	4.11616	6.03257
NZ_CP041928.1	0.0949813	0	73	858	circular	2019-08-23	South Korea: Seoul		37.56	126.98	missing	Homo sapiens		IncFII(K)_1, CP000648, |IncFIB(K)_1, JN233704,	IncF RST(K5:A-:B-):FIA(-);FIB(-);FIC(-);FII(-);FIIK(5);FIIS(-);FIIY(-)	202623	52.4551	Klebsiella pneumoniae	Klebsiella pneumoniae (573)	Klebsiella (570)	Enterobacteriaceae (543)	Enterobacterales (91347)	Gammaproteobacteria (1236)	Proteobacteria (1224)	Bacteria (2)	6.52138	7.67133
CP052410.1	0.0949813	0	73	859	circular	2020-05-04	South Korea: Gangwon		37.82	128.16	blood	Homo sapiens		IncR_1, DQ449578, |IncFIA(HI1)_1, AF250878,	IncF RST(F-:A13:B-):FIA(13);FIB(-);FIC(-);FII(-);FIIK(-);FIIS(-);FIIY(-)	63010	52.0346	Klebsiella pneumoniae	Klebsiella pneumoniae (573)	Klebsiella (570)	Enterobacteriaceae (543)	Enterobacterales (91347)	Gammaproteobacteria (1236)	Proteobacteria (1224)	Bacteria (2)	4.44858	5.60719
NZ_CP063685.1	0.0955937	0	72	860	circular	2020-11-04	India: Vellore		12.9255	79.1338	feces	Homo sapiens		IncC_1, JN157804,		241988	49.8793	Salmonella enterica subsp. enterica serovar Bareilly	Salmonella enterica (28901)	Salmonella (590)	Enterobacteriaceae (543)	Enterobacterales (91347)	Gammaproteobacteria (1236)	Proteobacteria (1224)	Bacteria (2)	1.73834	10.2466
NZ_CP017451.1	0.0955937	0	72	861	circular	2016-10-07	China: Xinjiang Province	China,Xinjiang	41.5	85.5		Alhagi sparsifolia Shap.	Whole organism	IncFIB(pNDM-Mar)_1, JN420336, |IncHI1B(pNDM-MAR)_1, JN420336, |Col440I_1, CP023920,	IncF RST(F-:A-:B-):FIA(-);FIB(-);FIC(-);FII(-);FIIK(-);FIIS(-);FIIY(-)|IncHI1 MLST(-):HCM1_043(-);HCM1_064(-);HCM1_099(-);HCM1_116(-);HCM1_178ac(-);HCM1_259(-);(-)	526446	49.0466	Klebsiella sp. LTGPAF-6F	Klebsiella sp. LTGPAF-6F (1905288)	Klebsiella (570)	Enterobacteriaceae (543)	Enterobacterales (91347)	Gammaproteobacteria (1236)	Proteobacteria (1224)	Bacteria (2)	15.6331	-0.139771
NZ_CP032988.1	0.0955937	0	72	862	circular	2018-10-23	China: Chengdu		30.6306	104.09	Bird (Egret) feces BE2	egret	cell culture	IncR_1, DQ449578, |IncX1_1, EU370913,		84688	50.7404	Escherichia coli	Escherichia coli (562)	Escherichia (561)	Enterobacteriaceae (543)	Enterobacterales (91347)	Gammaproteobacteria (1236)	Proteobacteria (1224)	Bacteria (2)	4.79789	5.06077
NZ_CP021166.1	0.0955937	0	72	863	circular	2018-06-07	USA:Boston	USA,Boston	42.3603	-71.0583	urine	Homo sapiens		IncFIB(K)_1, JN233704,	IncF RST(F-:A-:B-):FIA(-);FIB(-);FIC(-);FII(-);FIIK(-);FIIS(-);FIIY(-)	177145	51.3506	Klebsiella pneumoniae	Klebsiella pneumoniae (573)	Klebsiella (570)	Enterobacteriaceae (543)	Enterobacterales (91347)	Gammaproteobacteria (1236)	Proteobacteria (1224)	Bacteria (2)	5.81139	8.32374
NZ_CP026276.1	0.0955937	0	72	864	circular	2018-02-01	USA		38.9847	-77.0947				IncFIA(HI1)_1, AF250878, |IncFII(pKP91)_1, CP000966, |IncFIB(K)_1, JN233704, |IncFII(K)_1, CP000648,	IncF RST(K-:A-:B-):FIA(~21);FIB(-);FIC(-);FII(-);FIIK(3,28);FIIS(-);FIIY(10?)	282476	51.3445	Klebsiella oxytoca	Klebsiella oxytoca (571)	Klebsiella (570)	Enterobacteriaceae (543)	Enterobacterales (91347)	Gammaproteobacteria (1236)	Proteobacteria (1224)	Bacteria (2)	5.59895	7.43729
NZ_CP050174.1	0.0962153	0	71	865	circular	2020-03-27	China: Jiangsu		31.45	119.18	feces	pig		IncFIB(K)_1, JN233704, |IncFIA(HI1)_1, AF250878, |IncX1_1, EU370913,	IncF RST(F-:A18:B-):FIA(18);FIB(-);FIC(-);FII(-);FIIK(-);FIIS(-);FIIY(-)	97366	50.1828	Escherichia coli	Escherichia coli (562)	Escherichia (561)	Enterobacteriaceae (543)	Enterobacterales (91347)	Gammaproteobacteria (1236)	Proteobacteria (1224)	Bacteria (2)	4.91584	5.07497
NZ_MT219820.1	0.0962153	0	71	866	circular	2020-08-04								IncFIB(K)_1, JN233704, |IncFIA(HI1)_1, AF250878, |IncX1_1, EU370913,	IncF RST(F-:A18:B-):FIA(18);FIB(-);FIC(-);FII(-);FIIK(-);FIIS(-);FIIY(-)	97526	50.2205	Escherichia coli	Escherichia coli (562)	Escherichia (561)	Enterobacteriaceae (543)	Enterobacterales (91347)	Gammaproteobacteria (1236)	Proteobacteria (1224)	Bacteria (2)	4.98033	5.07126
NZ_MT219817.1	0.0962153	0	71	867	circular	2020-09-22								IncFIA(HI1)_1, AF250878, |IncFIB(K)_1, JN233704, |IncX1_1, EU370913,	IncF RST(F-:A18:B-):FIA(18);FIB(-);FIC(-);FII(-);FIIK(-);FIIS(-);FIIY(-)	101373	49.8397	Escherichia coli	Escherichia coli (562)	Escherichia (561)	Enterobacteriaceae (543)	Enterobacterales (91347)	Gammaproteobacteria (1236)	Proteobacteria (1224)	Bacteria (2)	4.9592	5.1409
NC_023334.1	0.0962153	0	71	868	circular	2014-01-24								IncFIB(K)_1, JN233704, |IncFII(K)_1, CP000648,	IncF RST(K5:A-:B-):FIA(-);FIB(-);FIC(-);FII(-);FIIK(5);FIIS(-);FIIY(-)	203577	51.829	Klebsiella pneumoniae	Klebsiella pneumoniae (573)	Klebsiella (570)	Enterobacteriaceae (543)	Enterobacterales (91347)	Gammaproteobacteria (1236)	Proteobacteria (1224)	Bacteria (2)	6.53029	7.67178
NZ_CP041286.1	0.0962153	0	71	869	circular	2020-04-16	China	China	34.4118	86.0327		cow	feces	IncFIB(K)_1, JN233704, |IncFIA(HI1)_1, AF250878, |IncX1_1, EU370913,	IncF RST(F-:A18:B-):FIA(18);FIB(-);FIC(-);FII(-);FIIK(-);FIIS(-);FIIY(-)	102347	49.8647	Escherichia coli	Escherichia coli (562)	Escherichia (561)	Enterobacteriaceae (543)	Enterobacterales (91347)	Gammaproteobacteria (1236)	Proteobacteria (1224)	Bacteria (2)	4.91968	5.10209
NZ_MK413720.1	0.0968463	0	70	870	circular	2020-06-04								IncHI2A_1, BX664015, |IncHI2_1, BX664015,	IncHI2 DLST(-):smr0018(~4);smr0199(1)	304702	46.641	Enterobacter cloacae	Enterobacter cloacae (550)	Enterobacter (547)	Enterobacteriaceae (543)	Enterobacterales (91347)	Gammaproteobacteria (1236)	Proteobacteria (1224)	Bacteria (2)	-2.37394	12.0216
NZ_CP041443.1	0.0968463	0	70	871	circular	2019-10-07	China: Yangzhou		32.24	119.26	Pork			IncFIB(K)_1, JN233704, |IncFIA(HI1)_1, AF250878, |IncX1_1, EU370913,	IncF RST(F-:A18:B-):FIA(18);FIB(-);FIC(-);FII(-);FIIK(-);FIIS(-);FIIY(-)	101987	50.0025	Escherichia coli	Escherichia coli (562)	Escherichia (561)	Enterobacteriaceae (543)	Enterobacterales (91347)	Gammaproteobacteria (1236)	Proteobacteria (1224)	Bacteria (2)	4.94742	5.11867
NZ_CP024507.1	0.0968463	0	70	872	circular	2017-11-08								IncFIB(pNDM-Mar)_1, JN420336,	IncF RST(F-:A-:B-):FIA(-);FIB(-);FIC(-);FII(-);FIIK(-);FIIS(-);FIIY(-)	310025	47.3933	Klebsiella pneumoniae	Klebsiella pneumoniae (573)	Klebsiella (570)	Enterobacteriaceae (543)	Enterobacterales (91347)	Gammaproteobacteria (1236)	Proteobacteria (1224)	Bacteria (2)	15.6455	-0.065496
NZ_CP051271.1	0.0968463	0	70	873	circular	2020-08-04	Canada: British Columbia	Canada,British Columbia	55.0013	-125.002		Quail	Cell culture	IncHI2_1, BX664015, |IncHI2A_1, BX664015,	IncHI2 DLST(1):smr0018(1);smr0199(1)	267356	45.4331	Salmonella enterica subsp. enterica serovar Worthington	Salmonella enterica (28901)	Salmonella (590)	Enterobacteriaceae (543)	Enterobacterales (91347)	Gammaproteobacteria (1236)	Proteobacteria (1224)	Bacteria (2)	-2.38047	12.0183
NZ_CP024153.1	0.0968463	0	70	874	circular	2018-01-11	China	China	34.4118	86.0327	clinical patient		single cell	IncFIA(HI1)_1, AF250878, |IncN_1, AY046276, |IncFIB(K)_1, JN233704,	IncF RST(F-:A18:B-):FIA(18);FIB(-);FIC(-);FII(-);FIIK(-);FIIS(-);FIIY(-)|IncN MLST(-):repN(1);traJ(-);korA(-)	98181	51.7768	Escherichia coli	Escherichia coli (562)	Escherichia (561)	Enterobacteriaceae (543)	Enterobacterales (91347)	Gammaproteobacteria (1236)	Proteobacteria (1224)	Bacteria (2)	4.91937	5.09002
CP043751.1	0.0968463	0	70	875	circular	2019-09-15	USA:GA	USA,GA	32.3294	-83.1137	ground turkey			IncX1_4, JN935898, |IncR_1, DQ449578,		81916	50.5274	Escherichia coli	Escherichia coli (562)	Escherichia (561)	Enterobacteriaceae (543)	Enterobacterales (91347)	Gammaproteobacteria (1236)	Proteobacteria (1224)	Bacteria (2)	4.76459	5.08265
CP052471.1	0.0974869	0	69	876	circular	2020-05-04	South Korea: Gangwon		37.82	128.16	blood	Homo sapiens		IncR_1, DQ449578, |IncFIA(HI1)_1, AF250878,	IncF RST(F-:A13:B-):FIA(13);FIB(-);FIC(-);FII(-);FIIK(-);FIIS(-);FIIY(-)	89703	52.4999	Klebsiella pneumoniae	Klebsiella pneumoniae (573)	Klebsiella (570)	Enterobacteriaceae (543)	Enterobacterales (91347)	Gammaproteobacteria (1236)	Proteobacteria (1224)	Bacteria (2)	4.42454	5.54038
NZ_CP032176.1	0.0974869	0	69	877	circular	2018-09-19	missing				missing	missing		IncFIA(HI1)_1, AF250878, |IncR_1, DQ449578,	IncF RST(F-:A13:B-):FIA(13);FIB(-);FIC(-);FII(-);FIIK(-);FIIS(-);FIIY(-)	90682	53.4748	Klebsiella pneumoniae	Klebsiella pneumoniae (573)	Klebsiella (570)	Enterobacteriaceae (543)	Enterobacterales (91347)	Gammaproteobacteria (1236)	Proteobacteria (1224)	Bacteria (2)	4.42499	5.52655
CP056986.1	0.0974869	0	69	878	circular	2020-07-28	United Kingdom	United Kingdom	54.7024	-3.27658	Pooled pig faecal samples collected from floor of farm		culture	IncHI2A_1, BX664015, |IncQ1_1, M28829, |IncHI2_1, BX664015,	IncHI2 DLST(-):smr0018(4);smr0199(-)	211919	46.4229	Escherichia coli	Escherichia coli (562)	Escherichia (561)	Enterobacteriaceae (543)	Enterobacterales (91347)	Gammaproteobacteria (1236)	Proteobacteria (1224)	Bacteria (2)	-3.26558	14.7032
NZ_CP059289.1	0.0974869	0	69	879	circular	2020-08-03	China: Hangzhou	China,Hangzhou	30.249	120.205	Missing	Homo sapiens		IncY_1, K02380,		99778	50.3989	Escherichia coli	Escherichia coli (562)	Escherichia (561)	Enterobacteriaceae (543)	Enterobacterales (91347)	Gammaproteobacteria (1236)	Proteobacteria (1224)	Bacteria (2)	4.88184	5.05573
NZ_MT090958.1	0.0974869	0	69	880	circular	2020-08-04								IncR_1, DQ449578, |IncFII(pHN7A8)_1, JN232517,	IncF RST(F33:A-:B-):FIA(-);FIB(-);FIC(5?);FII(33);FIIK(-);FIIS(-);FIIY(-)	182326	50.5984	Klebsiella pneumoniae	Klebsiella pneumoniae (573)	Klebsiella (570)	Enterobacteriaceae (543)	Enterobacterales (91347)	Gammaproteobacteria (1236)	Proteobacteria (1224)	Bacteria (2)	15.2018	1.08429
CP052554.1	0.0974869	0	69	881	circular	2020-05-04	South Korea: Seoul		37.57	126.98	blood	Homo sapiens		IncR_1, DQ449578, |IncFIA(HI1)_1, AF250878,	IncF RST(F-:A13:B-):FIA(13);FIB(-);FIC(-);FII(-);FIIK(-);FIIS(-);FIIY(-)	87818	52.7147	Klebsiella pneumoniae	Klebsiella pneumoniae (573)	Klebsiella (570)	Enterobacteriaceae (543)	Enterobacterales (91347)	Gammaproteobacteria (1236)	Proteobacteria (1224)	Bacteria (2)	4.39385	5.52353
NZ_CP017182.1	0.0974869	0	69	882	circular	2016-09-19	Japan		36	138	blood	Homo sapiens		IncFIB(pECLA)_1, CP001919,	IncF RST(F-:A-:B-):FIA(-);FIB(-);FIC(-);FII(-);FIIK(-);FIIS(-);FIIY(-)	47221	50.0244	Enterobacter kobei	Enterobacter kobei (208224)	Enterobacter (547)	Enterobacteriaceae (543)	Enterobacterales (91347)	Gammaproteobacteria (1236)	Proteobacteria (1224)	Bacteria (2)	5.01218	7.21802
NZ_CP025277.1	0.0974869	0	69	883	circular	2019-03-12	USA: BIFSCo Region 5	USA	39.7837	-100.446	Swine Final Chilled Carcass			IncHI2A_1, BX664015, |IncHI2_1, BX664015,	IncHI2 DLST(-):smr0018(1);smr0199(~1)	266480	45.4931	Salmonella enterica subsp. enterica	Salmonella enterica (28901)	Salmonella (590)	Enterobacteriaceae (543)	Enterobacterales (91347)	Gammaproteobacteria (1236)	Proteobacteria (1224)	Bacteria (2)	-2.37874	12.0205
NZ_CP012682.1	0.0974869	0	69	884	circular	2015-09-22	Mexico: Mexico City		19.43	-99.13	blood-culture	Homo sapiens; female		IncC_1, JN157804, |IncFIB(K)_1, JN233704,	IncF RST(F-:A-:B-):FIA(-);FIB(-);FIC(-);FII(-);FIIK(-);FIIS(-);FIIY(-)	161461	52.6536	Salmonella enterica subsp. enterica serovar Typhimurium	Salmonella enterica (28901)	Salmonella (590)	Enterobacteriaceae (543)	Enterobacterales (91347)	Gammaproteobacteria (1236)	Proteobacteria (1224)	Bacteria (2)	1.32372	9.25199
NZ_CP056131.1	0.0974869	0	69	885	circular	2020-08-03	United Kingdom	United Kingdom	54.7024	-3.27658	Freshwater sample from upstream of wastewater treatment plant		culture	IncR_1, DQ449578,		78977	51.6745	Enterobacter roggenkampii	Enterobacter roggenkampii (1812935)	Enterobacter (547)	Enterobacteriaceae (543)	Enterobacterales (91347)	Gammaproteobacteria (1236)	Proteobacteria (1224)	Bacteria (2)	4.72837	5.5337
NZ_CP019561.1	0.0974869	0	69	886	circular	2017-06-05	USA	USA	39.7837	-100.446	porcine		fecal	IncFII_1, AY458016,	IncF RST(F2:A-:B-):FIA(-);FIB(-);FIC(-);FII(2);FIIK(-);FIIS(-);FIIY(-)	148529	51.5818	Escherichia coli	Escherichia coli (562)	Escherichia (561)	Enterobacteriaceae (543)	Enterobacterales (91347)	Gammaproteobacteria (1236)	Proteobacteria (1224)	Bacteria (2)	-0.410613	6.10761
NZ_CP063903.1	0.0981375	0	68	887	circular	2020-11-10	China:Tangshan		39.36	118.11	Human fecal samples			IncFIB(K)_1, JN233704,	IncF RST(F-:A-:B-):FIA(-);FIB(-);FIC(-);FII(-);FIIK(-);FIIS(-);FIIY(-)	163712	53.1036	Klebsiella quasipneumoniae	Klebsiella quasipneumoniae (1463165)	Klebsiella (570)	Enterobacteriaceae (543)	Enterobacterales (91347)	Gammaproteobacteria (1236)	Proteobacteria (1224)	Bacteria (2)	17.8387	16.0209
NZ_CP051274.1	0.0981375	0	68	888	circular	2020-08-04	Canada: British Columbia	Canada,British Columbia	55.0013	-125.002		Partridge	Cell culture	IncHI2_1, BX664015, |IncHI2A_1, BX664015,	IncHI2 DLST(1):smr0018(1);smr0199(1)	267333	45.4991	Salmonella enterica subsp. enterica serovar Worthington	Salmonella enterica (28901)	Salmonella (590)	Enterobacteriaceae (543)	Enterobacterales (91347)	Gammaproteobacteria (1236)	Proteobacteria (1224)	Bacteria (2)	-2.38277	12.0165
NZ_CP033823.1	0.0981375	0	68	889	circular	2018-11-26	not applicable				Endotracheal aspirate	Homo sapiens		IncFII(Yp)_1, CP000670, |IncFIB(K)_1, JN233704,	IncF RST(Y7:A-:B-):FIA(-);FIB(-);FIC(-);FII(-);FIIK(-);FIIS(-);FIIY(7)	186836	52.2415	Klebsiella sp. FDAARGOS_511	Klebsiella sp. FDAARGOS_511 (2488567)	Klebsiella (570)	Enterobacteriaceae (543)	Enterobacterales (91347)	Gammaproteobacteria (1236)	Proteobacteria (1224)	Bacteria (2)	5.77523	7.78198
NZ_CP045188.1	0.0981375	0	68	890	circular	2019-12-11	China: NanTong		32.01	120.86	pig manure			IncX1_1, EU370913, |IncFIB(K)_1, JN233704, |IncFIA(HI1)_1, AF250878,	IncF RST(F-:A18:B-):FIA(18);FIB(-);FIC(-);FII(-);FIIK(-);FIIS(-);FIIY(-)	115253	48.692	Escherichia coli	Escherichia coli (562)	Escherichia (561)	Enterobacteriaceae (543)	Enterobacterales (91347)	Gammaproteobacteria (1236)	Proteobacteria (1224)	Bacteria (2)	4.92667	5.09307
NZ_CP019559.1	0.0981375	0	68	891	circular	2017-06-05	USA	USA	39.7837	-100.446	porcine		fecal	IncHI2A_1, BX664015, |IncHI2_1, BX664015,	IncHI2 DLST(1):smr0018(1);smr0199(1)	277790	45.3256	Escherichia coli	Escherichia coli (562)	Escherichia (561)	Enterobacteriaceae (543)	Enterobacterales (91347)	Gammaproteobacteria (1236)	Proteobacteria (1224)	Bacteria (2)	-2.3693	12.0294
NZ_CP064045.1	0.0981375	0	68	892	circular	2020-11-11	China:Tangshan		39.36	118.11	Human fecal samples			IncFIB(K)_1, JN233704,	IncF RST(F-:A-:B-):FIA(-);FIB(-);FIC(-);FII(-);FIIK(-);FIIS(-);FIIY(-)	163717	53.1038	Klebsiella quasipneumoniae	Klebsiella quasipneumoniae (1463165)	Klebsiella (570)	Enterobacteriaceae (543)	Enterobacterales (91347)	Gammaproteobacteria (1236)	Proteobacteria (1224)	Bacteria (2)	17.8498	16.0514
NZ_CP063888.1	0.0981375	0	68	893	circular	2020-11-10	China:Tangshan		39.36	118.11	Human fecal samples			IncFIB(K)_1, JN233704,	IncF RST(F-:A-:B-):FIA(-);FIB(-);FIC(-);FII(-);FIIK(-);FIIS(-);FIIY(-)	163716	53.1035	Klebsiella quasipneumoniae	Klebsiella quasipneumoniae (1463165)	Klebsiella (570)	Enterobacteriaceae (543)	Enterobacterales (91347)	Gammaproteobacteria (1236)	Proteobacteria (1224)	Bacteria (2)	17.8289	16.0378
NZ_AP021930.1	0.0987984	0	67	894	circular	2020-08-13	Japan:Tokyo		35.664	139.438				IncFII(pKP91)_1, CP000966, |IncFIB(K)_1, JN233704,	IncF RST(K9:A-:B-):FIA(-);FIB(-);FIC(-);FII(-);FIIK(9);FIIS(-);FIIY(-)	140912	51.6812	Klebsiella pneumoniae	Klebsiella pneumoniae (573)	Klebsiella (570)	Enterobacteriaceae (543)	Enterobacterales (91347)	Gammaproteobacteria (1236)	Proteobacteria (1224)	Bacteria (2)	5.77377	7.7551
NZ_CP063897.1	0.0987984	0	67	895	circular	2020-11-10	China:Tangshan		39.36	118.11	Human fecal samples			IncFIB(K)_1, JN233704,	IncF RST(F-:A-:B-):FIA(-);FIB(-);FIC(-);FII(-);FIIK(-);FIIS(-);FIIY(-)	163257	53.0954	Klebsiella quasipneumoniae	Klebsiella quasipneumoniae (1463165)	Klebsiella (570)	Enterobacteriaceae (543)	Enterobacterales (91347)	Gammaproteobacteria (1236)	Proteobacteria (1224)	Bacteria (2)	17.839	16.0233
[truncated: 20 more rows]
